# Supplementary material for: Development of Methodology to Investigate the Surface SMALPome of Mammalian Cells
Source: Front Mol Biosci. 2021 Nov 18;8:780033. doi: 10.3389/fmolb.2021.780033 (PMC8637157; doi:10.3389/fmolb.2021.780033)
Supplement: Supplementary file 1 [file Table2.XLSX]

## Sheet: Sheet1
Table S3 Mitochondrial membrane proteins found in SMA and RIPA datasets - wash protocol 3 The final datasets from SMA and RIPA (wash protocol 3) were subjected to filtering using the following conditions: Uniprot mitochondrial membrane protein list Parameter definitions: Accession: Uniprot accession number Protein names: Name of the protein Gene names: Gene names of associated protein
	SMA mitochondrial MPs					RIPA mitochondrial MPs
	Accession	Protein names	Gene names			Accession	Protein names	Gene names
1	A0A0R4J0B6	ATP-binding cassette sub-family G member 2 (EC 7.6.2.2) (Broad substrate specificity ATP-binding cassette transporter ABCG2) (Urate exporter)	Abcg2		1	Q8VCF0	Mitochondrial antiviral-signaling protein (MAVS) (CARD adapter inducing interferon beta) (Cardif) (Interferon beta promoter stimulator protein 1) (IPS-1) (Virus-induced-signaling adapter) (VISA)	Mavs Ips1 Visa
2	P97333	Neuropilin-1 (A5 protein) (CD antigen CD304)	Nrp1 Nrp		2	Q791T5	Mitochondrial carrier homolog 1 (Mitochondrial carrier-like protein 1)	Mtch1
					3	Q9CQB5	CDGSH iron-sulfur domain-containing protein 2 (MitoNEET-related 1 protein) (Miner1) (Nervous system overexpressed protein 70)	Cisd2 Cdgsh2 Noxp70 Zcd2
					4	Q9D880	Mitochondrial import inner membrane translocase subunit TIM50	Timm50 Tim50
					5	Q9DCZ4	MICOS complex subunit Mic26 (Apolipoprotein O) (MICOS complex subunit Mic23) (Protein FAM121B)	Apoo Fam121b Mic23 Mic26
					6	Q8R404	MICOS complex subunit MIC13	Micos13 Mic13 Qil1
					7	Q8BMD8	Calcium-binding mitochondrial carrier protein SCaMC-1 (Small calcium-binding mitochondrial carrier protein 1) (Solute carrier family 25 member 24)	Slc25a24 Scamc1
					8	Q9QXX4	Calcium-binding mitochondrial carrier protein Aralar2 (Citrin) (Mitochondrial aspartate glutamate carrier 2) (Solute carrier family 25 member 13)	Slc25a13 Aralar2
					9	Q9CR68	Cytochrome b-c1 complex subunit Rieske, mitochondrial (EC 7.1.1.8) (Complex III subunit 5) (Cytochrome b-c1 complex subunit 5) (Rieske iron-sulfur protein) (RISP) (Rieske protein UQCRFS1) (Ubiquinol-cytochrome c reductase iron-sulfur subunit) [Cleaved into: Cytochrome b-c1 complex subunit 9 (Su9) (Subunit 9) (8 kDa subunit 9) (Complex III subunit IX) (Cytochrome b-c1 complex subunit 11) (UQCRFS1 …	Uqcrfs1
					10	A0A075DC90	Cytochrome c oxidase subunit 2	COX2
					11	Q3UBW3	Mitochondrial import receptor subunit TOM22 homolog (Translocase of outer membrane 22 kDa subunit homolog)	Tomm22
					12	P19783	Cytochrome c oxidase subunit 4 isoform 1, mitochondrial (Cytochrome c oxidase polypeptide IV) (Cytochrome c oxidase subunit IV isoform 1) (COX IV-1)	Cox4i1 Cox4 Cox4a
					13	Q62425	Cytochrome c oxidase subunit NDUFA4	Ndufa4
					14	A8ASF5	Carnitine O-palmitoyltransferase (EC 2.3.1.21)	Cpt1a CPT I
					15	Q91V61	Sideroflexin-3	Sfxn3
					16	P48962	ADP/ATP translocase 1 (ADP,ATP carrier protein 1) (ADP,ATP carrier protein, heart/skeletal muscle isoform T1) (Adenine nucleotide translocator 1) (ANT 1) (Solute carrier family 25 member 4) (mANC1)	Slc25a4 Anc1 Ant1
					17	Q8BH59	Calcium-binding mitochondrial carrier protein Aralar1 (Mitochondrial aspartate glutamate carrier 1) (Solute carrier family 25 member 12)	Slc25a12 Aralar1
					18	O35465	Peptidyl-prolyl cis-trans isomerase FKBP8 (PPIase FKBP8) (EC 5.2.1.8) (38 kDa FK506-binding protein) (38 kDa FKBP) (FKBP-38) (mFKBP38) (FK506-binding protein 8) (FKBP-8) (FKBPR38) (Rotamase)	Fkbp8 Fkbp38 Sam11
					19	Q8JZU2	Tricarboxylate transport protein, mitochondrial (Citrate transport protein) (CTP) (Solute carrier family 25 member 1) (Tricarboxylate carrier protein)	Slc25a1
					20	Q9QYB1	Chloride intracellular channel protein 4 (mc3s5/mtCLIC)	Clic4
					21	Q61941	NAD(P) transhydrogenase, mitochondrial (EC 7.1.1.1) (Nicotinamide nucleotide transhydrogenase) (Pyridine nucleotide transhydrogenase)	Nnt
					22	P97333	Neuropilin-1 (A5 protein) (CD antigen CD304)	Nrp1 Nrp
