# Supplementary material for: Development of Methodology to Investigate the Surface SMALPome of Mammalian Cells
Source: Front Mol Biosci. 2021 Nov 18;8:780033. doi: 10.3389/fmolb.2021.780033 (PMC8637157; doi:10.3389/fmolb.2021.780033)
Supplement: Supplementary file 2 [file Table3.XLSX]

## Sheet: Sheet1
Table S2 GPI anchor proteins found in SMA and RIPA datasets - wash protocol 3 The final datasets from SMA and RIPA (wash protocol 3) were subjected to filtering using the following conditions: Uniprot GPI anchor protein list Parameter definitions: Accession: Uniprot accession number Protein names: Name of the protein Gene names: Gene names of associated protein
	SMA GPI anchor proteins						RIPA GPI anchor proteins
	Accession	Protein names	Gene names				Accession	Protein names	Gene names
1	P35456	Urokinase plasminogen activator surface receptor (U-PAR) (uPAR) (CD antigen CD87)	Plaur			1	Q7TQ33	Repulsive guidance molecule B (DRG11-responsive axonal guidance and outgrowth of neurite) (DRAGON)	Rgmb
2	P31428	Dipeptidase 1 (DPEP-1) (EC 3.4.13.19) (Beta-lactamase) (EC 3.5.2.6) (Membrane-bound dipeptidase 1) (MBD-1) (Microsomal dipeptidase) (Renal dipeptidase)	Dpep1 Mbd1 Rdp			2	Q80Z24	Neuronal growth regulator 1 (Kindred of IgLON) (Kilon) (Neurotractin)	Negr1 Kiaa3001 Ntra
3	Q3TZI7	Major prion protein	Prnp			3	Q8R2Q8	Bone marrow stromal antigen 2 (BST-2) (HM1.24 antigen) (CD antigen CD317)	Bst2
4	P01831	Thy-1 membrane glycoprotein (Thy-1 antigen) (CD antigen CD90)	Thy1 Thy-1			4	P35456	Urokinase plasminogen activator surface receptor (U-PAR) (uPAR) (CD antigen CD87)	Plaur
5	Q8R3X6	Glypican-6	Gpc6			5	Q8VDK4	Cadherin-13	Cdh13
6	P13595	Neural cell adhesion molecule 1 (N-CAM-1) (NCAM-1) (CD antigen CD56)	Ncam1 Ncam			6	Q3TZI7	Major prion protein	Prnp
7	Q9QZF2	Glypican-1 [Cleaved into: Secreted glypican-1]	Gpc1			7	O08604	Retinoic acid early-inducible protein 1-gamma (RAE-1-gamma)	Raet1c
8	P29533	Vascular cell adhesion protein 1 (V-CAM 1) (VCAM-1) (CD antigen CD106)	Vcam1 Vcam-1			8	O35632	Hyaluronidase-2 (Hyal-2) (EC 3.2.1.35) (Hyaluronoglucosaminidase-2)	Hyal2
9	Q8VDK4	Cadherin-13	Cdh13			9	P01831	Thy-1 membrane glycoprotein (Thy-1 antigen) (CD antigen CD90)	Thy1 Thy-1
10	P51655	Glypican-4 (K-glypican) [Cleaved into: Secreted glypican-4]	Gpc4			10	Q6PCX7	Repulsive guidance molecule A (RGM domain family member A)	Rgma
						11	P31428	Dipeptidase 1 (DPEP-1) (EC 3.4.13.19) (Beta-lactamase) (EC 3.5.2.6) (Membrane-bound dipeptidase 1) (MBD-1) (Microsomal dipeptidase) (Renal dipeptidase)	Dpep1 Mbd1 Rdp
						12	Q8R3X6	Glypican-6	Gpc6
						13	Q9QZF2	Glypican-1 [Cleaved into: Secreted glypican-1]	Gpc1
						14	P29533	Vascular cell adhesion protein 1 (V-CAM 1) (VCAM-1) (CD antigen CD106)	Vcam1 Vcam-1
						15	P51655	Glypican-4 (K-glypican) [Cleaved into: Secreted glypican-4]	Gpc4
