# Supplementary material for: Development of Methodology to Investigate the Surface SMALPome of Mammalian Cells
Source: Front Mol Biosci. 2021 Nov 18;8:780033. doi: 10.3389/fmolb.2021.780033 (PMC8637157; doi:10.3389/fmolb.2021.780033)
Supplement: Supplementary file 3 [file Table1.XLSX]

## Sheet: Contents
Table S1: MS comparisons of biotinylated cell surface proteins from 3T3L1 mouse fibroblasts, extracted with either SMA or RIPA. Subsequent filtered lists also present.
Tab	Data
Table S1, Tab A	Raw protein dataset for SMA - wash protocol 1
Table S1, Tab B	Raw protein dataset for RIPA - wash protocol 1
Table S1, Tab C	Initial filters for protein dataset for SMA - wash protocol 1
Table S1, Tab D	Initial filters for protein dataset for RIPA - wash protocol 1
Table S1, Tab E	Membrane protein and signal peptide filtered lists for protein dataset for SMA - wash protocol 1
Table S1, Tab F	Membrane protein and signal peptide filtered lists for protein dataset for RIPA - wash protocol 1
Table S1, Tab G	Raw protein dataset for SMA - wash protocol 2
Table S1, Tab H	Raw protein dataset for RIPA - wash protocol 2
Table S1, Tab I	Initial filters for protein dataset for SMA - wash protocol 2
Table S1, Tab J	Initial filters for protein dataset for RIPA - wash protocol 2
Table S1, Tab K	Membrane protein and signal peptide filtered lists for protein dataset for SMA - wash protocol 2
Table S1, Tab L	Membrane protein and signal peptide filtered lists for protein dataset for RIPA - wash protocol 2
Table S1, Tab M	Raw protein dataset for SMA - wash protocol 3
Table S1, Tab N	Raw protein dataset for RIPA - wash protocol 3
Table S1, Tab O	Initial filters for protein dataset for SMA - wash protocol 3
Table S1, Tab P	Initial filters for protein dataset for RIPA - wash protocol 3
Table S1, Tab Q	Membrane protein and signal peptide filtered lists for protein dataset for SMA - wash protocol 3
Table S1, Tab R	Membrane protein and signal peptide filtered lists for protein dataset for RIPA - wash protocol 3
Table S1, Tab S	Membrane protein abundance for SMA and RIPA extracts - wash protocol 3

## Sheet: Tab A
Table S1, Tab A Raw protein dataset for SMA - wash protocol 1 To generate these datasets mouse 3T3L1 fibroblasts underwent surface biotinylation of membrane proteins prior to extraction using SMA. Samples were separated using ultracentrifugation to remove insoluble membranous material. The resulting supernatant was purified using affinity chromatography with NeutAvidin beads. The beads were then …
Protein FDR Confidence	Accession	Description	Contaminant	Mouse	Coverage	# Peptides	# PSMs	# Unique Peptides	Area: F4: Sample	Score Sequest HT
High	P04264	Keratin, type II cytoskeletal 1 OS=Homo sapiens GN=KRT1 PE=1 SV=6	TRUE	FALSE	63.354	44	483	33	11601187737	1343.41
High	P35527	Keratin, type I cytoskeletal 9 OS=Homo sapiens GN=KRT9 PE=1 SV=3	TRUE	FALSE	81.3804	38	323	37	1.14466e+10	827.28
High	P13645	Keratin, type I cytoskeletal 10 OS=Homo sapiens GN=KRT10 PE=1 SV=6	TRUE	FALSE	58.5616	36	257	31	1.41666e+10	656.48
High	P35908	Keratin, type II cytoskeletal 2 epidermal OS=Homo sapiens GN=KRT2 PE=1 SV=2	TRUE	FALSE	74.0219	45	212	34	9.8049e+09	564.92
High	P02533	Keratin, type I cytoskeletal 14 OS=Homo sapiens GN=KRT14 PE=1 SV=4	TRUE	FALSE	68.2203	37	203	8	1.71326e+09	493.46
High	P08779	Keratin, type I cytoskeletal 16 OS=Homo sapiens GN=KRT16 PE=1 SV=4	TRUE	FALSE	71.0359	38	229	19	1.74845e+09	555.05
High	P02538	Keratin, type II cytoskeletal 6A OS=Homo sapiens GN=KRT6A PE=1 SV=3	TRUE	FALSE	55.8511	39	155	2	2.33615e+08	390.47
High	P04259	Keratin, type II cytoskeletal 6B OS=Homo sapiens GN=KRT6B PE=1 SV=5	TRUE	FALSE	53.5461	37	151	2	3.9724e+07	374.62
High	P13647	Keratin, type II cytoskeletal 5 OS=Homo sapiens GN=KRT5 PE=1 SV=3	TRUE	FALSE	53.5593	38	153	23	3.13957e+09	361.16
High	B2RRX1	Actin, beta OS=Mus musculus OX=10090 GN=Actb PE=2 SV=1	TRUE	TRUE	55.7333	21	106	1	5.22264e+07	264.63
High	P48668	Keratin, type II cytoskeletal 6C OS=Homo sapiens GN=KRT6C PE=1 SV=3	TRUE	FALSE	53.7234	38	152	2	5.95458e+06	374.79
High	P63260	Actin, cytoplasmic 2 OS=Mus musculus OX=10090 GN=Actg1 PE=1 SV=1	FALSE	TRUE	55.7333	21	105	1	3.72284e+07	261.05
High	P01012	Ovalbumin OS=Gallus gallus GN=SERPINB14 PE=1 SV=2	TRUE	FALSE	57.513	16	180	16	2.72707e+09	486
High	P63017	Heat shock cognate 71 kDa protein OS=Mus musculus OX=10090 GN=Hspa8 PE=1 SV=1	FALSE	TRUE	35.6037	21	57	17	5.28754e+08	137.37
High	Q04695	Keratin, type I cytoskeletal 17 OS=Homo sapiens GN=KRT17 PE=1 SV=2	TRUE	FALSE	57.8704	29	132	12	4.44521e+08	298.48
High	P02769	Serum albumin OS=Bos taurus GN=ALB PE=1 SV=4	TRUE	FALSE	56.5074	31	69	27	4.37994e+08	174.78
High	Q71LX8	Heat shock protein 84b OS=Mus musculus OX=10090 GN=Hsp90ab1 PE=1 SV=1	FALSE	TRUE	45.9945	29	73	18	9.09023e+08	172.99
High	E9Q557	Desmoplakin OS=Mus musculus OX=10090 GN=Dsp PE=1 SV=1	FALSE	TRUE	12.2789	36	54	36	2.87067e+08	110.97
High	P52480	Pyruvate kinase PKM OS=Mus musculus OX=10090 GN=Pkm PE=1 SV=4	FALSE	TRUE	48.5876	22	68	22	1.69112e+09	192.66
High	P58252	Elongation factor 2 OS=Mus musculus OX=10090 GN=Eef2 PE=1 SV=2	FALSE	TRUE	34.965	29	54	16	4.00885e+08	134.91
High	Q02257	Junction plakoglobin OS=Mus musculus OX=10090 GN=Jup PE=1 SV=3	FALSE	TRUE	34.3624	20	42	20	3.88327e+08	99.31
High	Q6IFX2	Keratin, type I cytoskeletal 42 OS=Mus musculus OX=10090 GN=Krt42 PE=1 SV=1	TRUE	TRUE	33.4071	20	100	1		241.53
High	P68033	Actin, alpha cardiac muscle 1 OS=Mus musculus OX=10090 GN=Actc1 PE=1 SV=1	FALSE	TRUE	42.1751	17	89	4	4.85465e+08	195.4
High	Q5FW97	Enolase 1, alpha non-neuron OS=Mus musculus OX=10090 GN=EG433182 PE=1 SV=1	FALSE	TRUE	46.7742	19	60	19	1.33977e+09	131.19
High	Q542G9	Annexin OS=Mus musculus OX=10090 GN=Anxa2 PE=1 SV=1	FALSE	TRUE	57.2271	19	36	19	8.94071e+08	98.32
High	Q86YZ3	Hornerin OS=Homo sapiens GN=HRNR PE=1 SV=2	TRUE	FALSE	13.9649	14	23	14	3.42601e+07	65.88
High	P10126	Elongation factor 1-alpha 1 OS=Mus musculus OX=10090 GN=Eef1a1 PE=1 SV=3	FALSE	TRUE	35.0649	14	107	14	6.59138e+09	272.02
High	P09411	Phosphoglycerate kinase 1 OS=Mus musculus OX=10090 GN=Pgk1 PE=1 SV=4	FALSE	TRUE	38.8489	14	50	14	4.46195e+08	127.01
High	O88569	Heterogeneous nuclear ribonucleoproteins A2/B1 OS=Mus musculus OX=10090 GN=Hnrnpa2b1 PE=1 SV=2	FALSE	TRUE	43.6261	13	35	11	3.4578e+08	93.15
High	Q64727	Vinculin OS=Mus musculus OX=10090 GN=Vcl PE=1 SV=4	FALSE	TRUE	22.7017	21	31	21	1.72218e+08	67.83
High	P99024	Tubulin beta-5 chain OS=Mus musculus OX=10090 GN=Tubb5 PE=1 SV=1	FALSE	TRUE	38.7387	14	57	3	3.59376e+08	147.64
High	P56480	ATP synthase subunit beta, mitochondrial OS=Mus musculus OX=10090 GN=Atp5f1b PE=1 SV=2	FALSE	TRUE	32.5142	12	33	12	1.89315e+08	97.73
High	P07901	Heat shock protein HSP 90-alpha OS=Mus musculus OX=10090 GN=Hsp90aa1 PE=1 SV=4	FALSE	TRUE	30.1501	21	44	11	2.12242e+08	105.44
High	Q99JX6	Annexin OS=Mus musculus OX=10090 GN=Anxa6 PE=2 SV=1	FALSE	TRUE	27.5862	17	31	17	1.24049e+08	75.9
High	Q4FK88	Annexin OS=Mus musculus OX=10090 GN=Anxa1 PE=2 SV=1	FALSE	TRUE	63.0058	20	37	20	1.07434e+09	86.59
High	P38647	Stress-70 protein, mitochondrial OS=Mus musculus OX=10090 GN=Hspa9 PE=1 SV=3	FALSE	TRUE	31.0751	18	30	17	1.47296e+08	78.68
High	P68372	Tubulin beta-4B chain OS=Mus musculus OX=10090 GN=Tubb4b PE=1 SV=1	FALSE	TRUE	38.6517	14	53	2	2.47617e+08	135.74
High	O08553	Dihydropyrimidinase-related protein 2 OS=Mus musculus OX=10090 GN=Dpysl2 PE=1 SV=2	FALSE	TRUE	29.7203	13	34	11	294725375	76.59
High	Q8VDD5	Myosin-9 OS=Mus musculus OX=10090 GN=Myh9 PE=1 SV=4	FALSE	TRUE	13.3673	24	29	21	4.17921e+07	67.15
High	Q3TIZ0	Tubulin alpha chain OS=Mus musculus OX=10090 GN=Tuba1c PE=2 SV=1	FALSE	TRUE	41.6481	16	41	4	2.80126e+08	106.2
High	Q8BTM8	Filamin-A OS=Mus musculus OX=10090 GN=Flna PE=1 SV=5	FALSE	TRUE	11.5603	22	26	20	4.4779e+07	64.97
High	P27773	Protein disulfide-isomerase A3 OS=Mus musculus OX=10090 GN=Pdia3 PE=1 SV=2	FALSE	TRUE	38.2178	18	38	18	3.3515e+08	79.73
High	Q3TFG3	Uncharacterized protein OS=Mus musculus OX=10090 GN=Eif4a1 PE=2 SV=1	FALSE	TRUE	37.931	14	36	5	1.65823e+08	63.28
High	P20029	Endoplasmic reticulum chaperone BiP OS=Mus musculus OX=10090 GN=Hspa5 PE=1 SV=3	FALSE	TRUE	31.145	15	24	13	2.07621e+08	57.55
High	P68040	Receptor of activated protein C kinase 1 OS=Mus musculus OX=10090 GN=Rack1 PE=1 SV=3	FALSE	TRUE	52.6814	15	25	15	2.55172e+08	72.32
High	Q99PT1	Rho GDP-dissociation inhibitor 1 OS=Mus musculus OX=10090 GN=Arhgdia PE=1 SV=3	FALSE	TRUE	53.4314	9	27	9	4.1173e+08	75.71
High	P63038	60 kDa heat shock protein, mitochondrial OS=Mus musculus OX=10090 GN=Hspd1 PE=1 SV=1	FALSE	TRUE	32.8098	14	26	14	3.55865e+08	72.76
High	F8WID5	Tropomyosin alpha-1 chain OS=Mus musculus OX=10090 GN=Tpm1 PE=1 SV=1	FALSE	TRUE	31.2883	14	28	3	3.90953e+07	70.54
High	Q6ZQK2	MKIAA0051 protein (Fragment) OS=Mus musculus OX=10090 GN=Iqgap1 PE=2 SV=1	FALSE	TRUE	12.0761	17	20	17	4.23317e+07	50.29
High	A0A0A0MQF6	Glyceraldehyde-3-phosphate dehydrogenase OS=Mus musculus OX=10090 GN=Gapdh PE=1 SV=1	FALSE	TRUE	32.8691	10	31	10	8.75736e+08	70.76
High	Q3TW51	Staphylococcal nuclease domain-containing protein OS=Mus musculus OX=10090 GN=Snd1 PE=2 SV=1	FALSE	TRUE	23.8462	18	23	18	76757606	50.37
High	P08113	Endoplasmin OS=Mus musculus OX=10090 GN=Hsp90b1 PE=1 SV=2	FALSE	TRUE	22.4439	15	25	14	1.3553e+08	62.34
High	Q80TM2	MKIAA1027 protein (Fragment) OS=Mus musculus OX=10090 GN=Tln1 PE=2 SV=4	FALSE	TRUE	9.36037	17	19	17	4.14531e+07	46.31
High	P19324	Serpin H1 OS=Mus musculus OX=10090 GN=Serpinh1 PE=1 SV=3	FALSE	TRUE	35.012	13	45	13	2.09585e+08	80.15
High	P26645	Myristoylated alanine-rich C-kinase substrate OS=Mus musculus OX=10090 GN=Marcks PE=1 SV=2	FALSE	TRUE	54.6926	9	15	9	1.41054e+08	49.18
High	Q80ZI9	WD repeat domain 1 (Fragment) OS=Mus musculus OX=10090 GN=Wdr1 PE=2 SV=1	FALSE	TRUE	20.6687	12	19	12	1.35658e+08	52.95
High	P47962	60S ribosomal protein L5 OS=Mus musculus OX=10090 GN=Rpl5 PE=1 SV=3	FALSE	TRUE	37.037	13	29	13	7.82989e+07	59.11
High	P26041	Moesin OS=Mus musculus OX=10090 GN=Msn PE=1 SV=3	FALSE	TRUE	29.9827	19	32	13	1.72351e+07	73.2
High	Q0VG47	Heterogeneous nuclear ribonucleoprotein A3 OS=Mus musculus OX=10090 GN=Hnrnpa3 PE=2 SV=1	FALSE	TRUE	32.493	9	22	8	297572051	58.33
High	Q571M2	MKIAA4025 protein (Fragment) OS=Mus musculus OX=10090 GN=Hspa4 PE=2 SV=1	FALSE	TRUE	25.2688	16	18	15	7.63615e+07	45.3
High	Q3UPA3	Rab GDP dissociation inhibitor (Fragment) OS=Mus musculus OX=10090 GN=Gdi2 PE=2 SV=1	FALSE	TRUE	25.9766	11	15	10	1.11188e+08	39.9
High	E9QA16	Caldesmon 1 OS=Mus musculus OX=10090 GN=Cald1 PE=1 SV=1	FALSE	TRUE	33.0224	17	25	17	1.57607e+08	50.65
High	Q544Y7	Cofilin 1, non-muscle OS=Mus musculus OX=10090 GN=Cfl1 PE=2 SV=1	FALSE	TRUE	68.0723	12	24	9	835256200	62.03
High	Q01853	Transitional endoplasmic reticulum ATPase OS=Mus musculus OX=10090 GN=Vcp PE=1 SV=4	FALSE	TRUE	23.6973	15	23	15	1.53297e+08	58.67
High	A0A0A0MQA5	Tubulin alpha chain (Fragment) OS=Mus musculus OX=10090 GN=Tuba4a PE=1 SV=1	FALSE	TRUE	31.8658	14	32	2	1.97782e+07	76.28
High	P17751	Triosephosphate isomerase OS=Mus musculus OX=10090 GN=Tpi1 PE=1 SV=4	FALSE	TRUE	32.7759	9	24	9	2.379e+08	77.69
High	P00698	Lysozyme C OS=Gallus gallus GN=LYZ PE=1 SV=1	TRUE	FALSE	74.1497	9	62	9	2.56723e+09	147.55
High	Q3TPG2	Uncharacterized protein (Fragment) OS=Mus musculus OX=10090 GN=Eef2 PE=2 SV=1	FALSE	TRUE	40.8719	14	27	1	3.57763e+07	78.76
High	Q5YLW3	Ribosomal protein S3 OS=Mus musculus OX=10090 GN=Rps3 PE=1 SV=1	FALSE	TRUE	60.4938	14	31	14	6.38907e+08	78.75
High	Q03265	ATP synthase subunit alpha, mitochondrial OS=Mus musculus OX=10090 GN=Atp5f1a PE=1 SV=1	FALSE	TRUE	24.5931	11	21	11	4.59007e+08	56.05
High	Q3UK83	Uncharacterized protein OS=Mus musculus OX=10090 GN=Hnrnpa1 PE=2 SV=1	FALSE	TRUE	32.9759	10	21	8	1.2478e+08	55.24
High	P62983	Ubiquitin-40S ribosomal protein S27a OS=Mus musculus OX=10090 GN=Rps27a PE=1 SV=2	FALSE	TRUE	59.6154	8	26	2	1.68133e+08	61.18
High	A0A1S6GWH5	UBA_e1_C domain-containing protein OS=Mus musculus OX=10090 GN=Uba1 PE=2 SV=1	FALSE	TRUE	13.6852	13	18	13	1.14953e+08	44.34
High	Q80X90	Filamin-B OS=Mus musculus OX=10090 GN=Flnb PE=1 SV=3	FALSE	TRUE	8.14758	15	17	13	2.25058e+07	47.16
High	Q58E70	Tpm3 protein OS=Mus musculus OX=10090 GN=Tpm3 PE=2 SV=1	FALSE	TRUE	42.7419	13	24	8	1.1392e+08	58.74
High	Q9D8N0	Elongation factor 1-gamma OS=Mus musculus OX=10090 GN=Eef1g PE=1 SV=3	FALSE	TRUE	29.0618	12	22	12	2.85884e+08	55.23
High	Q9WVA4	Transgelin-2 OS=Mus musculus OX=10090 GN=Tagln2 PE=1 SV=4	FALSE	TRUE	48.7437	9	45	9	3.41536e+08	90.56
High	E9PZF0	Nucleoside diphosphate kinase OS=Mus musculus OX=10090 GN=Gm20390 PE=3 SV=1	FALSE	TRUE	48.6891	8	41	2	3.60098e+07	98.38
High	P97350	Plakophilin-1 OS=Mus musculus OX=10090 GN=Pkp1 PE=1 SV=1	FALSE	TRUE	18.956	10	16	10	1.51538e+08	42.11
High	P19096	Fatty acid synthase OS=Mus musculus OX=10090 GN=Fasn PE=1 SV=2	FALSE	TRUE	7.54792	15	18	15	4.57798e+07	41.89
High	A0A0R4J0Z1	Protein disulfide-isomerase A4 OS=Mus musculus OX=10090 GN=Pdia4 PE=1 SV=1	FALSE	TRUE	23.5569	13	20	13	5.68958e+07	42.17
High	P16045	Galectin-1 OS=Mus musculus OX=10090 GN=Lgals1 PE=1 SV=3	FALSE	TRUE	57.7778	6	27	6	2.11164e+09	79.8
High	Q9DCN2	NADH-cytochrome b5 reductase 3 OS=Mus musculus OX=10090 GN=Cyb5r3 PE=1 SV=3	FALSE	TRUE	36.2126	10	20	10	2.88551e+08	45.76
High	Q3THQ5	Uncharacterized protein OS=Mus musculus OX=10090 GN=Stip1 PE=2 SV=1	FALSE	TRUE	27.256	14	19	14	1.21754e+08	46.53
High	Q3UBK2	Uncharacterized protein OS=Mus musculus OX=10090 PE=2 SV=1	FALSE	TRUE	36.2791	8	26	7	5.16763e+08	70.21
High	P48678	Prelamin-A/C OS=Mus musculus OX=10090 GN=Lmna PE=1 SV=2	FALSE	TRUE	22.406	14	19	14	1.06581e+08	39.62
High	Q9CQ65	S-methyl-5'-thioadenosine phosphorylase OS=Mus musculus OX=10090 GN=Mtap PE=1 SV=1	FALSE	TRUE	31.4488	7	13	7	100337577	39.64
High	Q3U7Z6	Phosphoglycerate mutase OS=Mus musculus OX=10090 GN=Pgam1 PE=1 SV=1	FALSE	TRUE	51.1811	10	19	10	5.01317e+07	38.87
High	Q80Y09	Pdcd6ip protein OS=Mus musculus OX=10090 GN=Pdcd6ip PE=2 SV=1	FALSE	TRUE	19.7248	13	17	13	6.01928e+07	40.74
High	P13020	Gelsolin OS=Mus musculus OX=10090 GN=Gsn PE=1 SV=3	FALSE	TRUE	18.9744	12	20	12	1.24003e+08	38.82
High	Q7Z794	Keratin, type II cytoskeletal 1b OS=Homo sapiens GN=KRT77 PE=2 SV=3	TRUE	FALSE	21.4533	12	54	9	3.77483e+07	136.64
High	Q5NC81	Nucleoside diphosphate kinase OS=Mus musculus OX=10090 GN=Nme1 PE=1 SV=1	FALSE	TRUE	48.0263	7	39	1	5.62054e+06	94.92
High	Q61753	D-3-phosphoglycerate dehydrogenase OS=Mus musculus OX=10090 GN=Phgdh PE=1 SV=3	FALSE	TRUE	15.7598	7	13	7	2.72253e+08	42.56
High	Q923G3	F-actin-capping protein subunit beta OS=Mus musculus OX=10090 GN=Capzb PE=2 SV=1	FALSE	TRUE	40.8088	9	14	9	5.56215e+07	33.33
High	P16110	Galectin-3 OS=Mus musculus OX=10090 GN=Lgals3 PE=1 SV=3	FALSE	TRUE	26.8939	7	18	7	1.7105e+08	41.83
High	Q3U561	Ribosomal protein OS=Mus musculus OX=10090 GN=Rpl10a PE=2 SV=1	FALSE	TRUE	33.1797	7	20	7	1.89338e+08	59.17
High	Q91XV3	Brain acid soluble protein 1 OS=Mus musculus OX=10090 GN=Basp1 PE=1 SV=3	FALSE	TRUE	57.9646	8	13	8	1.38458e+08	44.51
High	Q6IRU2	Tropomyosin alpha-4 chain OS=Mus musculus OX=10090 GN=Tpm4 PE=1 SV=3	FALSE	TRUE	51.6129	15	20	14	4.97131e+07	49.99
High	Q29443	Serotransferrin OS=Bos taurus GN=TF PE=2 SV=1	TRUE	FALSE	19.1761	11	14	10	7.27707e+07	36.35
High	P97351	40S ribosomal protein S3a OS=Mus musculus OX=10090 GN=Rps3a PE=1 SV=3	FALSE	TRUE	31.4394	9	19	9	5.61738e+07	37.47
High	P09405	Nucleolin OS=Mus musculus OX=10090 GN=Ncl PE=1 SV=2	FALSE	TRUE	21.2164	16	20	16	100291025	40.33
High	P08249	Malate dehydrogenase, mitochondrial OS=Mus musculus OX=10090 GN=Mdh2 PE=1 SV=3	FALSE	TRUE	39.3491	11	14	11	1.67231e+08	35.09
High	Q3ULZ3	Phosphoserine aminotransferase OS=Mus musculus OX=10090 GN=Psat1 PE=2 SV=1	FALSE	TRUE	30.8108	11	21	11	2.46082e+08	51.14
High	P63242	Eukaryotic translation initiation factor 5A-1 OS=Mus musculus OX=10090 GN=Eif5a PE=1 SV=2	FALSE	TRUE	22.7273	4	14	4	2.48725e+08	46.45
High	O70569	Ribosomal protein S14 OS=Mus musculus OX=10090 GN=rps14 PE=3 SV=1	FALSE	TRUE	36.4238	5	11	5	9.33166e+07	34.06
High	P24369	Peptidyl-prolyl cis-trans isomerase B OS=Mus musculus OX=10090 GN=Ppib PE=1 SV=2	FALSE	TRUE	33.7963	8	19	8	2.22665e+08	45.24
High	Q99KI0	Aconitate hydratase, mitochondrial OS=Mus musculus OX=10090 GN=Aco2 PE=1 SV=1	FALSE	TRUE	17.9487	11	13	11	63977363	38.1
High	A6ZI44	Fructose-bisphosphate aldolase OS=Mus musculus OX=10090 GN=Aldoa PE=1 SV=1	FALSE	TRUE	32.0574	12	20	12	3.65873e+08	44.55
High	P08752	Guanine nucleotide-binding protein G(i) subunit alpha-2 OS=Mus musculus OX=10090 GN=Gnai2 PE=1 SV=5	FALSE	TRUE	27.3239	8	15	7	3.82603e+07	36.11
High	E9Q455	Tropomyosin alpha-1 chain OS=Mus musculus OX=10090 GN=Tpm1 PE=1 SV=1	FALSE	TRUE	36.255	11	22	2	5248304	51.71
High	F8WIV2	Serine (or cysteine) peptidase inhibitor, clade B, member 6a OS=Mus musculus OX=10090 GN=Serpinb6a PE=1 SV=1	FALSE	TRUE	24.0602	9	22	9	7.08944e+07	28.63
High	P10630	Eukaryotic initiation factor 4A-II OS=Mus musculus OX=10090 GN=Eif4a2 PE=1 SV=2	FALSE	TRUE	29.484	11	23	2	4.76664e+06	34.34
High	Q6A0F1	MKIAA0002 protein (Fragment) OS=Mus musculus OX=10090 GN=Cct8 PE=2 SV=1	FALSE	TRUE	27.027	13	14	13	7.08719e+07	34.66
High	P19012	Keratin, type I cytoskeletal 15 OS=Homo sapiens GN=KRT15 PE=1 SV=3	TRUE	FALSE	14.9123	10	83	2	1.84482e+07	184.49
High	Q8K411	Presequence protease, mitochondrial OS=Mus musculus OX=10090 GN=Pitrm1 PE=1 SV=1	FALSE	TRUE	9.55598	8	14	8	3.27348e+07	36.5
High	Q11011	Puromycin-sensitive aminopeptidase OS=Mus musculus OX=10090 GN=Npepps PE=1 SV=2	FALSE	TRUE	13.587	11	17	11	6.47711e+07	42.48
High	P08727	Keratin, type I cytoskeletal 19 OS=Homo sapiens GN=KRT19 PE=1 SV=4	TRUE	FALSE	19	11	66	1	6.33296e+07	128.99
High	Q1A602	Non-muscle alpha-actinin 4 OS=Mus musculus OX=10090 GN=Actn4 PE=2 SV=1	FALSE	TRUE	14.4896	12	14	7	3.49674e+07	30.51
High	ENSEMBL:ENSBTAP00000007350	(Bos taurus) similar to Complement C4-A precursor [OS=Bos taurus]	TRUE	FALSE	7.92193	12	15	12	5.06008e+07	31.64
High	Q3TE63	Peptidyl-prolyl cis-trans isomerase OS=Mus musculus OX=10090 GN=Ppia PE=2 SV=1	FALSE	TRUE	37.8049	7	31	7	1.51145e+09	72.62
High	Q3TXF9	Sodium/potassium-transporting ATPase subunit alpha OS=Mus musculus OX=10090 GN=Atp1a1 PE=2 SV=1	FALSE	TRUE	14.956	12	17	12	7.79108e+07	41.4
High	P40142	Transketolase OS=Mus musculus OX=10090 GN=Tkt PE=1 SV=1	FALSE	TRUE	25.8427	12	15	12	5.07207e+07	37.5
High	Q8VHX6	Filamin-C OS=Mus musculus OX=10090 GN=Flnc PE=1 SV=3	FALSE	TRUE	6.60308	13	13	9	1.30323e+07	34.99
High	P09103	Protein disulfide-isomerase OS=Mus musculus OX=10090 GN=P4hb PE=1 SV=2	FALSE	TRUE	22.5933	12	16	12	1.48001e+08	36.48
High	Q8BFZ3	Beta-actin-like protein 2 OS=Mus musculus OX=10090 GN=Actbl2 PE=1 SV=1	FALSE	TRUE	14.3617	5	22	1	9.78708e+07	44.12
High	Q3TL71	Uncharacterized protein OS=Mus musculus OX=10090 GN=Hnrnpk PE=2 SV=1	FALSE	TRUE	24.7845	9	18	9	1.09061e+08	38.56
High	P70168	Importin subunit beta-1 OS=Mus musculus OX=10090 GN=Kpnb1 PE=1 SV=2	FALSE	TRUE	12.4429	9	15	9	1.19802e+08	26.91
High	P35700	Peroxiredoxin-1 OS=Mus musculus OX=10090 GN=Prdx1 PE=1 SV=1	FALSE	TRUE	45.2261	8	23	7	1.14253e+09	61.13
High	Q61990	Poly(rC)-binding protein 2 OS=Mus musculus OX=10090 GN=Pcbp2 PE=1 SV=1	FALSE	TRUE	30.3867	9	15	4	8.75718e+07	41.77
High	P62259	14-3-3 protein epsilon OS=Mus musculus OX=10090 GN=Ywhae PE=1 SV=1	FALSE	TRUE	52.1569	11	20	10	1.3707e+08	44.73
High	P48962	ADP/ATP translocase 1 OS=Mus musculus OX=10090 GN=Slc25a4 PE=1 SV=4	FALSE	TRUE	44.6309	14	24	8	4.66806e+08	44.18
High	P54071	Isocitrate dehydrogenase [NADP], mitochondrial OS=Mus musculus OX=10090 GN=Idh2 PE=1 SV=3	FALSE	TRUE	26.9912	10	14	9	66289979	30.9
High	A2AIM4	Tropomyosin beta chain OS=Mus musculus OX=10090 GN=Tpm2 PE=1 SV=1	FALSE	TRUE	22.5352	8	12	3	8.77834e+06	37.36
High	B2MWM9	Calreticulin OS=Mus musculus OX=10090 GN=Calr PE=1 SV=1	FALSE	TRUE	20.4327	8	12	8	1.10649e+08	23.91
High	Q99P72	Reticulon-4 OS=Mus musculus OX=10090 GN=Rtn4 PE=1 SV=2	FALSE	TRUE	10.4991	8	13	8	1.26558e+08	33.64
High	P57776	Elongation factor 1-delta OS=Mus musculus OX=10090 GN=Eef1d PE=1 SV=3	FALSE	TRUE	32.7402	8	12	1	7.28473e+06	31.04
High	Q497I3	Fatty acid binding protein 5, epidermal OS=Mus musculus OX=10090 GN=Fabp5 PE=1 SV=1	FALSE	TRUE	57.037	6	14	6	1.11866e+08	40.01
High	P63101	14-3-3 protein zeta/delta OS=Mus musculus OX=10090 GN=Ywhaz PE=1 SV=1	FALSE	TRUE	37.551	7	15	6	1.88683e+08	28.84
High	Q3T9S3	SET translocation OS=Mus musculus OX=10090 GN=Set PE=2 SV=1	FALSE	TRUE	24.9135	7	9	7	3.14047e+08	25.89
High	Q3TIU8	Uncharacterized protein OS=Mus musculus OX=10090 GN=Abce1 PE=2 SV=1	FALSE	TRUE	20.2003	10	14	10	5.6729e+07	34.44
High	Q3UAG2	6-phosphogluconate dehydrogenase, decarboxylating OS=Mus musculus OX=10090 GN=Pgd PE=2 SV=1	FALSE	TRUE	24.6377	10	17	10	1.39898e+08	41.02
High	Q3UIJ2	Tr-type G domain-containing protein OS=Mus musculus OX=10090 GN=Eif2s3x PE=2 SV=1	FALSE	TRUE	19.9153	7	9	7	7.53168e+07	22.78
High	P62242	40S ribosomal protein S8 OS=Mus musculus OX=10090 GN=Rps8 PE=1 SV=2	FALSE	TRUE	32.2115	6	12	6	3.47584e+08	34.26
High	P62702	40S ribosomal protein S4, X isoform OS=Mus musculus OX=10090 GN=Rps4x PE=1 SV=2	FALSE	TRUE	38.7833	9	20	9	1.62343e+08	34.06
High	Q9CWJ9	Bifunctional purine biosynthesis protein PURH OS=Mus musculus OX=10090 GN=Atic PE=1 SV=2	FALSE	TRUE	18.0743	7	9	7	6.45879e+07	24.52
High	P60335	Poly(rC)-binding protein 1 OS=Mus musculus OX=10090 GN=Pcbp1 PE=1 SV=1	FALSE	TRUE	30.0562	9	13	4	1.47375e+08	35.86
High	A0A1W2P7Q9	Myosin light polypeptide 6 OS=Mus musculus OX=10090 GN=Myl6 PE=1 SV=1	FALSE	TRUE	43.038	7	20	7	9.56147e+07	47.99
High	E9PWE8	Dihydropyrimidinase-related protein 3 OS=Mus musculus OX=10090 GN=Dpysl3 PE=1 SV=1	FALSE	TRUE	13.6164	6	13	4	3.5837e+07	29.61
High	Q3UIG8	Methyltransf_25 domain-containing protein OS=Mus musculus OX=10090 GN=Prmt1 PE=1 SV=1	FALSE	TRUE	35.1275	11	15	11	135831259	35.54
High	Q3TGU7	Peptidase_M24 domain-containing protein OS=Mus musculus OX=10090 GN=Pa2g4 PE=1 SV=1	FALSE	TRUE	27.1574	9	16	9	2.83321e+08	31.31
High	A1A4T2	Alpha glucosidase 2 alpha neutral subunit OS=Mus musculus OX=10090 GN=Ganab PE=2 SV=1	FALSE	TRUE	14.4928	14	17	14	6.90217e+07	27.85
High	A0A1B0GSX0	L-lactate dehydrogenase OS=Mus musculus OX=10090 GN=Ldha PE=1 SV=1	FALSE	TRUE	24.9307	9	16	8	3.94435e+08	38.4
High	A0A0A6YY47	Neural cell adhesion molecule 1 OS=Mus musculus OX=10090 GN=Ncam1 PE=1 SV=1	FALSE	TRUE	12.6179	8	10	1	46936020	23.49
High	E9QB01	Neural cell adhesion molecule 1 OS=Mus musculus OX=10090 GN=Ncam1 PE=1 SV=2	FALSE	TRUE	12.4853	8	10	1	2.03143e+07	20.85
High	B2CY77	Laminin receptor (Fragment) OS=Mus musculus OX=10090 GN=Rpsa PE=2 SV=1	FALSE	TRUE	33.5593	8	14	8	1.70279e+08	44.62
High	P97315	Cysteine and glycine-rich protein 1 OS=Mus musculus OX=10090 GN=Csrp1 PE=1 SV=3	FALSE	TRUE	37.3057	6	9	6	7.37762e+07	26.48
High	Q9CZN7	Serine hydroxymethyltransferase, mitochondrial OS=Mus musculus OX=10090 GN=Shmt2 PE=1 SV=1	FALSE	TRUE	24.6032	12	16	11	2.18461e+08	34.57
High	P40124	Adenylyl cyclase-associated protein 1 OS=Mus musculus OX=10090 GN=Cap1 PE=1 SV=4	FALSE	TRUE	30.3797	11	15	11	5.67558e+07	34.81
High	Q61553	Fascin OS=Mus musculus OX=10090 GN=Fscn1 PE=1 SV=4	FALSE	TRUE	24.5436	11	14	11	5.08813e+07	18.29
High	Q545A2	Uncharacterized protein OS=Mus musculus OX=10090 GN=Slc25a5 PE=1 SV=1	FALSE	TRUE	35.2349	11	22	5	2.30802e+08	36.97
High	Q3U7V7	Profilin OS=Mus musculus OX=10090 GN=Pfn1 PE=2 SV=1	FALSE	TRUE	54.2857	6	24	6	4.29324e+08	44.27
High	P02768	Serum albumin OS=Homo sapiens GN=ALB PE=1 SV=2	TRUE	FALSE	20.8539	12	20	8	1.01927e+08	41.09
High	B6ZHD0	Erythrocyte protein band 4.1-like 2 OS=Mus musculus OX=10090 GN=Epb41l2 PE=2 SV=1	FALSE	TRUE	12.247	7	9	5	5.69423e+07	26.26
High	P09055	Integrin beta-1 OS=Mus musculus OX=10090 GN=Itgb1 PE=1 SV=1	FALSE	TRUE	11.5288	8	10	8	4.6614e+07	23.94
High	Q80U89	MKIAA0034 protein (Fragment) OS=Mus musculus OX=10090 GN=mKIAA0034 PE=4 SV=2	FALSE	TRUE	6.71021	11	12	11	2.1679e+07	25.12
High	Q3U0V1	Far upstream element-binding protein 2 OS=Mus musculus OX=10090 GN=Khsrp PE=1 SV=2	FALSE	TRUE	18.8503	9	10	8	6.16702e+07	26.54
High	A0A345IT93	Envelope polyprotein (Fragment) OS=Mus musculus OX=10090 GN=env PE=4 SV=1	FALSE	TRUE	17.9673	7	9	7	3.95338e+07	23.48
High	Q8BMK4	Cytoskeleton-associated protein 4 OS=Mus musculus OX=10090 GN=Ckap4 PE=1 SV=2	FALSE	TRUE	12.3478	6	8	6	4.26093e+07	24.19
High	P04104	Keratin, type II cytoskeletal 1 OS=Mus musculus OX=10090 GN=Krt1 PE=1 SV=4	FALSE	TRUE	6.90738	7	66	1	8.40861e+06	183.32
High	P97429	Annexin A4 OS=Mus musculus OX=10090 GN=Anxa4 PE=1 SV=4	FALSE	TRUE	23.1975	6	8	6	9.01167e+07	23.01
High	Q3UMM1	Tubulin beta chain OS=Mus musculus OX=10090 GN=Tubb6 PE=1 SV=1	FALSE	TRUE	27.9642	10	19	5	1.88124e+07	42.6
High	Q5DTI2	MKIAA4195 protein (Fragment) OS=Mus musculus OX=10090 GN=Atp2a2 PE=2 SV=1	FALSE	TRUE	7.0688	6	10	6	1.11701e+07	23.1
High	Q99LC5	Electron transfer flavoprotein subunit alpha, mitochondrial OS=Mus musculus OX=10090 GN=Etfa PE=1 SV=2	FALSE	TRUE	28.5285	7	9	7	3.85512e+07	24.95
High	Q9Z2X1	Heterogeneous nuclear ribonucleoprotein F OS=Mus musculus OX=10090 GN=Hnrnpf PE=1 SV=3	FALSE	TRUE	19.0361	5	10	5	1.87936e+07	29.3
High	E1B991	Uncharacterized protein OS=Bos taurus GN=KRT2 PE=3 SV=2	TRUE	FALSE	9.72447	8	50	1	8.15077e+06	137.66
High	Q9DB79	Ribosomal_S17_N domain-containing protein OS=Mus musculus OX=10090 GN=Rps11 PE=2 SV=1	FALSE	TRUE	43.9759	8	21	8	162157163	46.82
High	Q8C338	Isocitrate dehydrogenase [NADP] OS=Mus musculus OX=10090 GN=Idh1 PE=2 SV=1	FALSE	TRUE	20.6161	9	13	8	1.75214e+07	29.23
High	P20930	Filaggrin OS=Homo sapiens GN=FLG PE=1 SV=3	TRUE	FALSE	3.49668	6	10	6	4.78389e+07	19.59
High	O35639	Annexin A3 OS=Mus musculus OX=10090 GN=Anxa3 PE=1 SV=4	FALSE	TRUE	31.5789	9	9	9	8.30649e+07	23.86
High	Q9CPY7	Cytosol aminopeptidase OS=Mus musculus OX=10090 GN=Lap3 PE=1 SV=3	FALSE	TRUE	24.8555	10	13	10	4.188e+07	22.15
High	Q7TPR4	Alpha-actinin-1 OS=Mus musculus OX=10090 GN=Actn1 PE=1 SV=1	FALSE	TRUE	12.2197	9	10	4	1.43752e+07	24.52
High	Q9DB05	Alpha-soluble NSF attachment protein OS=Mus musculus OX=10090 GN=Napa PE=1 SV=1	FALSE	TRUE	38.9831	9	9	9	1.9229e+07	24.65
High	P30416	Peptidyl-prolyl cis-trans isomerase FKBP4 OS=Mus musculus OX=10090 GN=Fkbp4 PE=1 SV=5	FALSE	TRUE	28.821	11	17	11	3.24682e+07	30.4
High	B2RUC7	Serine/threonine kinase receptor associated protein OS=Mus musculus OX=10090 GN=Strap PE=1 SV=1	FALSE	TRUE	24	6	7	6	6.92849e+07	18.29
High	P05202	Aspartate aminotransferase, mitochondrial OS=Mus musculus OX=10090 GN=Got2 PE=1 SV=1	FALSE	TRUE	23.2558	9	16	9	1.47975e+08	33.58
High	Q8K2B3	Succinate dehydrogenase [ubiquinone] flavoprotein subunit, mitochondrial OS=Mus musculus OX=10090 GN=Sdha PE=1 SV=1	FALSE	TRUE	17.7711	8	10	8	3.2339e+07	29.14
High	A0A0R4J1L2	Elongation factor 1-delta OS=Mus musculus OX=10090 GN=Eef1d PE=1 SV=1	FALSE	TRUE	34.6304	8	12	1	5.60318e+06	29.78
High	Q8BK67	Protein RCC2 OS=Mus musculus OX=10090 GN=Rcc2 PE=1 SV=1	FALSE	TRUE	16.7308	7	11	7	5.97458e+07	28.01
High	Q3U111	FERM domain-containing protein (Fragment) OS=Mus musculus OX=10090 GN=Rdx PE=2 SV=1	FALSE	TRUE	12.9909	10	14	4	9.23157e+06	32.35
High	Q9CQR2	40S ribosomal protein S21 OS=Mus musculus OX=10090 GN=Rps21 PE=1 SV=1	FALSE	TRUE	57.8313	4	12	4	1.93687e+08	33.12
High	ENSEMBL:ENSBTAP00000024146	(Bos taurus) similar to alpha-2-macroglobulin isoform 1 [OS=Bos taurus]	TRUE	FALSE	5.34868	6	7	6	2.73857e+08	20.62
High	P62827	GTP-binding nuclear protein Ran OS=Mus musculus OX=10090 GN=Ran PE=1 SV=3	FALSE	TRUE	25.463	6	14	6	7.45695e+08	36.45
High	Q8BFR5	Elongation factor Tu, mitochondrial OS=Mus musculus OX=10090 GN=Tufm PE=1 SV=1	FALSE	TRUE	21.9027	8	12	8	6.70554e+07	30.61
High	B1AX58	Plastin-3 OS=Mus musculus OX=10090 GN=Pls3 PE=1 SV=1	FALSE	TRUE	13.302	7	8	7	2.92508e+07	20.61
High	P30681	High mobility group protein B2 OS=Mus musculus OX=10090 GN=Hmgb2 PE=1 SV=3	FALSE	TRUE	19.5238	3	9	2	1.6017e+08	27.42
High	Q3THH1	Uncharacterized protein OS=Mus musculus OX=10090 GN=Pdia6 PE=2 SV=1	FALSE	TRUE	19.5506	6	7	6	2.3318e+07	22.47
High	P80315	T-complex protein 1 subunit delta OS=Mus musculus OX=10090 GN=Cct4 PE=1 SV=3	FALSE	TRUE	14.1002	6	11	5	4.73625e+07	26.65
High	A8IP69	14-3-3 protein gamma subtype OS=Mus musculus OX=10090 GN=Ywhag PE=1 SV=1	FALSE	TRUE	27.9352	7	13	3	1.76321e+08	26.46
High	P62806	Histone H4 OS=Mus musculus OX=10090 GN=H4c1 PE=1 SV=2	FALSE	TRUE	51.4563	6	19	6	8.1736e+08	42.1
High	P15626	Glutathione S-transferase Mu 2 OS=Mus musculus OX=10090 GN=Gstm2 PE=1 SV=2	FALSE	TRUE	28.4404	8	14	6	4.41815e+07	25.86
High	G5E902	Phosphate carrier protein, mitochondrial OS=Mus musculus OX=10090 GN=Slc25a3 PE=1 SV=1	FALSE	TRUE	15.6425	6	13	6	5.29138e+07	32.61
High	P42227	Signal transducer and activator of transcription 3 OS=Mus musculus OX=10090 GN=Stat3 PE=1 SV=2	FALSE	TRUE	8.18182	4	6	4	3.04433e+07	15.57
High	B2RRE0	A kinase (PRKA) anchor protein (Gravin) 12 OS=Mus musculus OX=10090 GN=Akap12 PE=2 SV=1	FALSE	TRUE	3.74109	3	6	3	1.22989e+07	22.99
High	Q3TF14	Adenosylhomocysteinase OS=Mus musculus OX=10090 GN=Ahcy PE=1 SV=1	FALSE	TRUE	17.8241	6	12	5	1.43896e+08	32.07
High	Q8CI51	PDZ and LIM domain protein 5 OS=Mus musculus OX=10090 GN=Pdlim5 PE=1 SV=4	FALSE	TRUE	19.4585	7	8	7	5.38345e+07	19.4
High	Q61699	Heat shock protein 105 kDa OS=Mus musculus OX=10090 GN=Hsph1 PE=1 SV=2	FALSE	TRUE	12.4709	9	11	8	3.61217e+07	23.14
High	Q5FWB6	60S acidic ribosomal protein P0 OS=Mus musculus OX=10090 GN=Rplp0 PE=2 SV=1	FALSE	TRUE	26.183	5	10	5	1.25861e+08	29.12
High	ENSEMBL:ENSBTAP00000024466	(Bos taurus) 44 kDa protein [OS=Bos taurus]	TRUE	FALSE	18.7032	5	10	1	1.12597e+07	25.4
High	Q8BT90	Uncharacterized protein (Fragment) OS=Mus musculus OX=10090 GN=Rps17 PE=2 SV=1	FALSE	TRUE	16.3121	4	12	4	1.81908e+08	23.54
High	P26883	Peptidyl-prolyl cis-trans isomerase FKBP1A OS=Mus musculus OX=10090 GN=Fkbp1a PE=1 SV=2	FALSE	TRUE	29.6296	3	7	3	6.35954e+07	21.93
High	Q64737	Trifunctional purine biosynthetic protein adenosine-3 OS=Mus musculus OX=10090 GN=Gart PE=1 SV=3	FALSE	TRUE	7.52475	5	6	5	1.01634e+07	15.07
High	A0A1B0GSG5	Ribonuclease inhibitor OS=Mus musculus OX=10090 GN=Rnh1 PE=1 SV=1	FALSE	TRUE	17.8862	7	10	7	6.32024e+07	28.12
High	ENSEMBL:ENSBTAP00000024462	(Bos taurus) 47 kDa protein [OS=Bos taurus]	TRUE	FALSE	19.0931	5	10	1		25.83
High	A2A7S7	Tyrosine--tRNA ligase OS=Mus musculus OX=10090 GN=Yars PE=1 SV=1	FALSE	TRUE	19.1489	10	11	10	2.68596e+07	21.6
High	Q3V1M8	Uncharacterized protein OS=Mus musculus OX=10090 GN=Hdlbp PE=2 SV=1	FALSE	TRUE	9.14826	9	10	9	3.60534e+07	19.15
High	Q3U900	Dolichyl-diphosphooligosaccharide--protein glycosyltransferase subunit 1 OS=Mus musculus OX=10090 GN=Rpn1 PE=2 SV=1	FALSE	TRUE	13.3224	8	9	8	8.07794e+07	15.98
High	Q3TIQ2	Uncharacterized protein OS=Mus musculus OX=10090 GN=Rpl12 PE=2 SV=1	FALSE	TRUE	40	4	10	4	2.62885e+08	33.09
High	Q9CQK2	40S ribosomal protein S24 OS=Mus musculus OX=10090 GN=Rps24 PE=2 SV=1	FALSE	TRUE	20.1493	3	12	3	7.91109e+07	28.8
High	A2AE89	Glutathione S-transferase Mu 1 OS=Mus musculus OX=10090 GN=Gstm1 PE=1 SV=2	FALSE	TRUE	25.4098	7	13	5	1.56511e+08	22.72
High	Q3TXE5	Uncharacterized protein OS=Mus musculus OX=10090 GN=Canx PE=2 SV=1	FALSE	TRUE	12.6904	6	10	6	48574204	24.59
High	Q3TIA9	Glutamine amidotransferase type-2 domain-containing protein OS=Mus musculus OX=10090 GN=Asns PE=2 SV=1	FALSE	TRUE	18.1818	8	10	8	3.30837e+07	23.18
High	Q61599	Rho GDP-dissociation inhibitor 2 OS=Mus musculus OX=10090 GN=Arhgdib PE=1 SV=3	FALSE	TRUE	25.5	3	9	3	1.49617e+08	25.8
High	P55264	Adenosine kinase OS=Mus musculus OX=10090 GN=Adk PE=1 SV=2	FALSE	TRUE	18.0055	7	9	7	1.44537e+07	17.66
High	Q4FJQ0	Rab7 OS=Mus musculus OX=10090 GN=Rab7 PE=1 SV=1	FALSE	TRUE	44.9275	8	11	8	1.46345e+08	22.65
High	Q3TQX5	Uncharacterized protein OS=Mus musculus OX=10090 GN=Ddx3x PE=1 SV=1	FALSE	TRUE	15.5589	9	11	8	6.29704e+07	26.39
High	Q3TLP8	Ras-related C3 botulinum toxin substrate 1 OS=Mus musculus OX=10090 GN=Rac1 PE=1 SV=1	FALSE	TRUE	31.7536	7	12	6	1.91756e+08	29.87
High	Q3UXN3	tRNA-synt_1e domain-containing protein OS=Mus musculus OX=10090 GN=Cars PE=2 SV=1	FALSE	TRUE	7.58123	5	6	5	1.23088e+07	17.17
High	P61205	ADP-ribosylation factor 3 OS=Mus musculus OX=10090 GN=Arf3 PE=2 SV=2	FALSE	TRUE	22.6519	4	11	3	5.49772e+07	21.91
High	Q6PB66	Leucine-rich PPR motif-containing protein, mitochondrial OS=Mus musculus OX=10090 GN=Lrpprc PE=1 SV=2	FALSE	TRUE	6.03448	7	7	7	1.2814e+07	15.79
High	Q6ZQ38	Cullin-associated NEDD8-dissociated protein 1 OS=Mus musculus OX=10090 GN=Cand1 PE=1 SV=2	FALSE	TRUE	7.23577	8	10	8	6.81699e+07	23.1
High	Q9R0H5	Keratin, type II cytoskeletal 71 OS=Mus musculus OX=10090 GN=Krt71 PE=1 SV=1	TRUE	TRUE	11.2595	6	44	3	1.45029e+07	122.01
High	Q8BKC5	Importin-5 OS=Mus musculus OX=10090 GN=Ipo5 PE=1 SV=3	FALSE	TRUE	7.01914	7	8	7	2.38238e+07	20.23
High	Q5CZY9	Rps16 protein OS=Mus musculus OX=10090 GN=Rps16 PE=2 SV=1	FALSE	TRUE	34.3023	7	17	7	3.50858e+08	31.67
High	A0A5F8MPR1	Band 4.1-like protein 3 OS=Mus musculus OX=10090 GN=Epb41l3 PE=4 SV=1	FALSE	TRUE	9.35857	6	8	4	1.29968e+07	20.65
High	Q3U3N7	TPR_REGION domain-containing protein OS=Mus musculus OX=10090 GN=St13 PE=2 SV=1	FALSE	TRUE	15.903	6	7	6	1.11088e+08	19.4
High	Q80UT7	Rpl7a protein (Fragment) OS=Mus musculus OX=10090 GN=Rpl7a PE=2 SV=1	FALSE	TRUE	25.1852	6	9	6	6.93228e+07	24.05
High	Q3TZ32	AA_TRNA_LIGASE_II_ALA domain-containing protein OS=Mus musculus OX=10090 GN=Aars PE=2 SV=1	FALSE	TRUE	8.16116	6	6	6	2.70926e+07	14.47
High	Q3TNN6	Uncharacterized protein OS=Mus musculus OX=10090 GN=Capg PE=2 SV=1	FALSE	TRUE	17.4785	4	6	4	9.44828e+07	18.68
High	Q4FJN9	Fdps protein OS=Mus musculus OX=10090 GN=Fdps PE=1 SV=1	FALSE	TRUE	13.5977	5	9	5	1.47135e+08	21.55
High	P17710	Hexokinase-1 OS=Mus musculus OX=10090 GN=Hk1 PE=1 SV=3	FALSE	TRUE	7.3922	7	8	7	2.43799e+07	18.68
High	Q3V0Z8	Uncharacterized protein (Fragment) OS=Mus musculus OX=10090 GN=Ddx5 PE=2 SV=1	FALSE	TRUE	12.3188	8	11	6	1.69923e+07	28.07
High	P17879	Heat shock 70 kDa protein 1B OS=Mus musculus OX=10090 GN=Hspa1b PE=1 SV=3	FALSE	TRUE	13.2399	6	10	4	3.44967e+07	25.03
High	P56395	Cytochrome b5 OS=Mus musculus OX=10090 GN=Cyb5a PE=1 SV=2	FALSE	TRUE	41.0448	4	6	4	1.15339e+08	18.84
High	Q9DB77	Cytochrome b-c1 complex subunit 2, mitochondrial OS=Mus musculus OX=10090 GN=Uqcrc2 PE=1 SV=1	FALSE	TRUE	15.2318	5	6	5	5.1586e+07	14.77
High	P19013	Keratin, type II cytoskeletal 4 OS=Homo sapiens GN=KRT4 PE=1 SV=4	TRUE	FALSE	14.9813	7	14	3	2.05654e+07	33.18
High	Q9CQV8	14-3-3 protein beta/alpha OS=Mus musculus OX=10090 GN=Ywhab PE=1 SV=3	FALSE	TRUE	28.4553	6	12	3	7.3431e+07	25.98
High	O08529	Calpain-2 catalytic subunit OS=Mus musculus OX=10090 GN=Capn2 PE=1 SV=4	FALSE	TRUE	9.28571	5	7	5	1.42698e+08	18.61
High	Q3US15	NAD(P)-dependent steroid dehydrogenase-like protein OS=Mus musculus OX=10090 GN=Nsdhl PE=1 SV=1	FALSE	TRUE	16.0221	5	8	5	1.68533e+07	15.83
High	Q9CY58	Plasminogen activator inhibitor 1 RNA-binding protein OS=Mus musculus OX=10090 GN=Serbp1 PE=1 SV=2	FALSE	TRUE	17.4447	6	9	6	2.85482e+07	18.31
High	Q60930	Voltage-dependent anion-selective channel protein 2 OS=Mus musculus OX=10090 GN=Vdac2 PE=1 SV=2	FALSE	TRUE	24.0678	6	8	6	1.05721e+08	21.12
High	P01831	Thy-1 membrane glycoprotein OS=Mus musculus OX=10090 GN=Thy1 PE=1 SV=1	FALSE	TRUE	31.4815	4	10	4	1.64717e+08	27.88
High	Q3UPL0	Protein transport protein Sec31A OS=Mus musculus OX=10090 GN=Sec31a PE=1 SV=2	FALSE	TRUE	7.39837	7	9	7	2.31188e+07	21.4
High	P43276	Histone H1.5 OS=Mus musculus OX=10090 GN=H1-5 PE=1 SV=2	FALSE	TRUE	18.8341	5	9	4	1.953e+08	21.19
High	A0A2I3BRT4	Epiplakin OS=Mus musculus OX=10090 GN=Eppk1 PE=1 SV=1	FALSE	TRUE	4.30885	4	5	4		14.21
High	P42208	Septin-2 OS=Mus musculus OX=10090 GN=Septin2 PE=1 SV=2	FALSE	TRUE	16.6205	5	8	5	6.33818e+07	20.93
High	P80316	T-complex protein 1 subunit epsilon OS=Mus musculus OX=10090 GN=Cct5 PE=1 SV=1	FALSE	TRUE	9.24214	5	12	4	1.94002e+07	21.99
High	Q3TJ71	UDP-glucose 6-dehydrogenase OS=Mus musculus OX=10090 GN=Ugdh PE=2 SV=1	FALSE	TRUE	15.6187	7	8	7	4.90396e+07	16.56
High	P99027	60S acidic ribosomal protein P2 OS=Mus musculus OX=10090 GN=Rplp2 PE=1 SV=3	FALSE	TRUE	53.0435	4	8	4	281965660	22.85
High	Q8C243	Peptidase A1 domain-containing protein OS=Mus musculus OX=10090 GN=Ctsd PE=2 SV=1	FALSE	TRUE	12.5843	4	5	3	4.90316e+07	13.32
High	A3KML3	Tyrosine 3-monooxygenase/tryptophan 5-monooxygenase activation protein, theta polypeptide OS=Mus musculus OX=10090 GN=Ywhaq PE=2 SV=1	FALSE	TRUE	24.898	6	10	4	4.29249e+06	21.71
High	P62984	Ubiquitin-60S ribosomal protein L40 OS=Mus musculus OX=10090 GN=Uba52 PE=1 SV=2	FALSE	TRUE	55.4688	7	18	1	5.32411e+06	32.85
High	Q8C2Q7	Heterogeneous nuclear ribonucleoprotein H OS=Mus musculus OX=10090 GN=Hnrnph1 PE=1 SV=1	FALSE	TRUE	14.6186	6	9	6	3.21354e+07	16.21
High	P29341	Polyadenylate-binding protein 1 OS=Mus musculus OX=10090 GN=Pabpc1 PE=1 SV=2	FALSE	TRUE	13.0503	7	8	7	3.00795e+07	19.47
High	Q9CPN8	Insulin-like growth factor 2 mRNA-binding protein 3 OS=Mus musculus OX=10090 GN=Igf2bp3 PE=1 SV=1	FALSE	TRUE	13.1261	6	7	6	1.78515e+07	18.39
High	Q61543	Golgi apparatus protein 1 OS=Mus musculus OX=10090 GN=Glg1 PE=1 SV=1	FALSE	TRUE	4.76596	5	6	5	2.20173e+07	14.03
High	B2RXS4	Plexin-B2 OS=Mus musculus OX=10090 GN=Plxnb2 PE=1 SV=1	FALSE	TRUE	3.90879	7	7	7	8.2598e+06	18.22
High	Q91YR1	Twinfilin-1 OS=Mus musculus OX=10090 GN=Twf1 PE=1 SV=2	FALSE	TRUE	19.1429	5	8	5	4.57511e+06	21.55
High	P62880	Guanine nucleotide-binding protein G(I)/G(S)/G(T) subunit beta-2 OS=Mus musculus OX=10090 GN=Gnb2 PE=1 SV=3	FALSE	TRUE	18.2353	6	10	4	6.24993e+07	17.24
High	P11679	Keratin, type II cytoskeletal 8 OS=Mus musculus OX=10090 GN=Krt8 PE=1 SV=4	FALSE	TRUE	6.32653	6	43	1	2.21113e+07	89.24
High	Q3U630	AA_TRNA_LIGASE_II domain-containing protein OS=Mus musculus OX=10090 GN=Tars PE=2 SV=1	FALSE	TRUE	12.7424	8	10	8	6.09774e+07	20.4
High	Q3TVZ1	Catalase OS=Mus musculus OX=10090 GN=Cat PE=2 SV=1	FALSE	TRUE	13.852	5	6	4	2.78343e+07	17.14
High	E9Q8Z8	Catenin delta-1 OS=Mus musculus OX=10090 GN=Ctnnd1 PE=1 SV=1	FALSE	TRUE	6.92865	5	7	5	1.38297e+07	16.33
High	B2RRH9	Guanine monphosphate synthetase OS=Mus musculus OX=10090 GN=Gmps PE=1 SV=1	FALSE	TRUE	8.51371	5	7	5	1.97483e+07	17.57
High	Q9CVB6	Actin-related protein 2/3 complex subunit 2 OS=Mus musculus OX=10090 GN=Arpc2 PE=1 SV=3	FALSE	TRUE	23.3333	8	9	8	2.06664e+07	19.1
High	A0A0N4SW28	Guanine nucleotide-binding protein subunit gamma OS=Mus musculus OX=10090 GN=Gng12 PE=1 SV=1	FALSE	TRUE	30.1205	2	12	2	3.47794e+07	14.21
High	Q3TCP5	FERM domain-containing protein OS=Mus musculus OX=10090 GN=Ezr PE=2 SV=1	FALSE	TRUE	11.6041	8	12	3	5.71052e+06	26.61
High	Q9DB20	ATP synthase subunit O, mitochondrial OS=Mus musculus OX=10090 GN=Atp5po PE=1 SV=1	FALSE	TRUE	27.6995	4	6	4	3.44263e+07	15.69
High	Q4FK36	Destrin OS=Mus musculus OX=10090 GN=Dstn PE=1 SV=1	FALSE	TRUE	40.6061	7	9	6	112210672	16.26
High	Q9DCL9	Multifunctional protein ADE2 OS=Mus musculus OX=10090 GN=Paics PE=1 SV=4	FALSE	TRUE	13.6471	5	7	5	3.72182e+07	14.22
High	Q5XKE5	Keratin, type II cytoskeletal 79 OS=Homo sapiens GN=KRT79 PE=1 SV=2	TRUE	FALSE	13.6449	8	35	1	2.60203e+06	73.62
High	P63028	Translationally-controlled tumor protein OS=Mus musculus OX=10090 GN=Tpt1 PE=1 SV=1	FALSE	TRUE	15.1163	2	10	2	1.27936e+08	20.36
High	Q3TK29	HATPase_c domain-containing protein OS=Mus musculus OX=10090 GN=Trap1 PE=2 SV=1	FALSE	TRUE	10.6232	6	6	5	2.22345e+08	14.34
High	Q3TNL1	Glucose-6-phosphate 1-dehydrogenase OS=Mus musculus OX=10090 GN=G6pdx PE=2 SV=1	FALSE	TRUE	14.5631	7	7	7	52512863	10.44
High	A0A1W2P7A1	40S ribosomal protein S12 OS=Mus musculus OX=10090 GN=Rps12 PE=1 SV=1	FALSE	TRUE	35.1351	4	8	4	6.22011e+07	25.39
High	P62830	60S ribosomal protein L23 OS=Mus musculus OX=10090 GN=Rpl23 PE=1 SV=1	FALSE	TRUE	43.5714	5	13	5	1.41382e+08	31.25
High	P46935	E3 ubiquitin-protein ligase NEDD4 OS=Mus musculus OX=10090 GN=Nedd4 PE=1 SV=3	FALSE	TRUE	9.35738	6	8	6	2.4347e+07	19.09
High	Q3UDY1	Aldo_ket_red domain-containing protein OS=Mus musculus OX=10090 GN=Akr1b3 PE=1 SV=1	FALSE	TRUE	25	7	11	7	1.57094e+08	13.7
High	Q3TUF3	Uncharacterized protein OS=Mus musculus OX=10090 GN=Calu PE=1 SV=1	FALSE	TRUE	21.9048	7	10	1		23.23
High	Q5BLK2	Ribosomal protein S20 OS=Mus musculus OX=10090 GN=Rps20 PE=1 SV=1	FALSE	TRUE	25.2101	3	10	3	180247067	25.42
High	Q5M9P3	Rps19 protein (Fragment) OS=Mus musculus OX=10090 GN=Rps19 PE=2 SV=1	FALSE	TRUE	37.0861	7	12	7	2.8405e+08	24.86
High	P50544	Very long-chain specific acyl-CoA dehydrogenase, mitochondrial OS=Mus musculus OX=10090 GN=Acadvl PE=1 SV=3	FALSE	TRUE	11.4329	6	6	6	3.99019e+07	16.19
High	P11440	Cyclin-dependent kinase 1 OS=Mus musculus OX=10090 GN=Cdk1 PE=1 SV=3	FALSE	TRUE	19.8653	5	7	5	3.96985e+07	18.81
High	O08807	Peroxiredoxin-4 OS=Mus musculus OX=10090 GN=Prdx4 PE=1 SV=1	FALSE	TRUE	25.1825	6	9	5	2.71595e+08	23.35
High	A0A2R8VHP3	Predicted pseudogene 5478 OS=Mus musculus OX=10090 GN=Gm5478 PE=1 SV=1	FALSE	TRUE	9.34579	7	18	1		36.24
High	Q5U438	Nucleophosmin 1 OS=Mus musculus OX=10090 GN=Npm1 PE=2 SV=1	FALSE	TRUE	27.3973	5	6	5	3.65265e+07	14.62
High	Q5D862	Filaggrin-2 OS=Homo sapiens GN=FLG2 PE=1 SV=1	TRUE	FALSE	5.26976	6	6	6	4.6609e+06	17.08
High	Q76MZ3	Serine/threonine-protein phosphatase 2A 65 kDa regulatory subunit A alpha isoform OS=Mus musculus OX=10090 GN=Ppp2r1a PE=1 SV=3	FALSE	TRUE	6.96095	4	6	4	2.2232e+07	12.7
High	P62137	Serine/threonine-protein phosphatase PP1-alpha catalytic subunit OS=Mus musculus OX=10090 GN=Ppp1ca PE=1 SV=1	FALSE	TRUE	19.0909	7	10	7	3.66997e+07	14.39
High	P27659	60S ribosomal protein L3 OS=Mus musculus OX=10090 GN=Rpl3 PE=1 SV=3	FALSE	TRUE	9.67742	4	13	4	9.8139e+07	27.44
High	G5E924	Heterogeneous nuclear ribonucleoprotein L (Fragment) OS=Mus musculus OX=10090 GN=Hnrnpl PE=1 SV=1	FALSE	TRUE	13.3333	5	7	5	1.29998e+07	20.03
High	Q3TL20	S5 DRBM domain-containing protein OS=Mus musculus OX=10090 GN=Rps2 PE=2 SV=1	FALSE	TRUE	26.2799	8	12	8	1.34445e+08	16.34
High	A0A2C9F2D2	Annexin OS=Mus musculus OX=10090 GN=Anxa7 PE=1 SV=1	FALSE	TRUE	14.2268	6	6	6	2.77903e+07	13.47
High	P56959	RNA-binding protein FUS OS=Mus musculus OX=10090 GN=Fus PE=1 SV=1	FALSE	TRUE	10.0386	4	6	4	1.52424e+08	18.76
High	O55023	Inositol monophosphatase 1 OS=Mus musculus OX=10090 GN=Impa1 PE=1 SV=1	FALSE	TRUE	18.4116	5	7	5	1.0775e+08	15.64
High	P19157	Glutathione S-transferase P 1 OS=Mus musculus OX=10090 GN=Gstp1 PE=1 SV=2	FALSE	TRUE	20.4762	3	6	2	5.7472e+07	18.37
High	A2AEX6	Four and a half LIM domains protein 1 OS=Mus musculus OX=10090 GN=Fhl1 PE=1 SV=1	FALSE	TRUE	17.1521	4	7	4	1.55551e+07	19.03
High	P68871	Hemoglobin subunit beta OS=Homo sapiens GN=HBB PE=1 SV=2	TRUE	FALSE	46.2585	6	6	6	8.46659e+07	12.16
High	P43274	Histone H1.4 OS=Mus musculus OX=10090 GN=H1-4 PE=1 SV=2	FALSE	TRUE	19.6347	6	9	2	3.42686e+08	22.31
High	P27612	Phospholipase A-2-activating protein OS=Mus musculus OX=10090 GN=Plaa PE=1 SV=4	FALSE	TRUE	6.42317	4	6	4	1.12381e+07	16.56
High	Q3TQ70	Beta1 subnuit of GTP-binding protein OS=Mus musculus OX=10090 GN=Gnb1 PE=1 SV=1	FALSE	TRUE	13.5294	4	9	2	1.0888e+07	13.8
High	Q5BLK1	40S ribosomal protein S6 OS=Mus musculus OX=10090 GN=Rps6 PE=1 SV=1	FALSE	TRUE	18.8755	4	8	4	2.21858e+08	23.56
High	P43275	Histone H1.1 OS=Mus musculus OX=10090 GN=H1-1 PE=1 SV=2	FALSE	TRUE	14.554	2	3	1	18259471	9.56
High	Q9DCW4	Electron transfer flavoprotein subunit beta OS=Mus musculus OX=10090 GN=Etfb PE=1 SV=3	FALSE	TRUE	29.0196	7	9	7	8.87396e+07	20.26
High	F8WHL2	Coatomer subunit alpha OS=Mus musculus OX=10090 GN=Copa PE=1 SV=1	FALSE	TRUE	4.54177	5	6	5	1.8021e+07	11.98
High	O35286	Pre-mRNA-splicing factor ATP-dependent RNA helicase DHX15 OS=Mus musculus OX=10090 GN=Dhx15 PE=1 SV=2	FALSE	TRUE	9.93711	7	7	7	2.5094e+07	15.49
High	E9PYH2	Cytosolic acyl coenzyme A thioester hydrolase OS=Mus musculus OX=10090 GN=Acot7 PE=1 SV=1	FALSE	TRUE	11.4583	3	8	3	5.66682e+07	23.14
High	P50396	Rab GDP dissociation inhibitor alpha OS=Mus musculus OX=10090 GN=Gdi1 PE=1 SV=3	FALSE	TRUE	8.94855	3	4	2	6.42204e+06	12.47
High	Q9D2R0	Acetoacetyl-CoA synthetase OS=Mus musculus OX=10090 GN=Aacs PE=1 SV=1	FALSE	TRUE	12.3512	8	10	8	1.50688e+07	20.2
High	Q3TVK3	Aspartyl aminopeptidase OS=Mus musculus OX=10090 GN=Dnpep PE=1 SV=1	FALSE	TRUE	9.68421	4	6	4	9.95062e+06	15.37
High	Q50HX0	RAB14 protein OS=Mus musculus OX=10090 GN=Rab14 PE=2 SV=1	FALSE	TRUE	40	6	8	1		22.85
High	Q542X7	Uncharacterized protein OS=Mus musculus OX=10090 GN=Cct2 PE=1 SV=1	FALSE	TRUE	14.3925	6	6	6	4.10593e+07	16.4
High	Q3TH64	Cytochrome b5 heme-binding domain-containing protein OS=Mus musculus OX=10090 GN=Cyb5b PE=2 SV=1	FALSE	TRUE	27.3973	3	5	3	1.56986e+07	14.75
High	Q3TIK0	Platelet-activating factor acetylhydrolase IB subunit alpha OS=Mus musculus OX=10090 GN=Pafah1b1 PE=2 SV=1	FALSE	TRUE	18.0488	5	6	5	4.51063e+07	16.17
High	Q7TSF1	Desmoglein-1-beta OS=Mus musculus OX=10090 GN=Dsg1b PE=1 SV=1	FALSE	TRUE	2.83019	4	8	4	2.56499e+07	19.02
High	Q8C483	Serine--tRNA ligase, cytoplasmic OS=Mus musculus OX=10090 GN=Sars PE=1 SV=1	FALSE	TRUE	11.194	5	6	5	3.83932e+07	13.11
High	Q9JIF7	Coatomer subunit beta OS=Mus musculus OX=10090 GN=Copb1 PE=1 SV=1	FALSE	TRUE	6.19098	4	4	4	1.32257e+07	10.92
High	Q8C1W9	Uncharacterized protein OS=Mus musculus OX=10090 GN=Nap1l4 PE=2 SV=1	FALSE	TRUE	9.47867	3	8	2	3.49902e+06	15.31
High	P97314	Cysteine and glycine-rich protein 2 OS=Mus musculus OX=10090 GN=Csrp2 PE=1 SV=3	FALSE	TRUE	36.2694	5	7	5	4.62021e+07	15.09
High	Q0PD67	Rab1A OS=Mus musculus OX=10090 GN=Rab1a PE=1 SV=1	FALSE	TRUE	34.6341	8	11	7	2.91123e+07	22.01
High	Q8BJY1	26S proteasome non-ATPase regulatory subunit 5 OS=Mus musculus OX=10090 GN=Psmd5 PE=1 SV=4	FALSE	TRUE	10.5159	5	5	5	20241250	13.33
High	Q6ZWY3	40S ribosomal protein S27-like OS=Mus musculus OX=10090 GN=Rps27l PE=1 SV=3	FALSE	TRUE	38.0952	3	7	1	256432209	17.52
High	Q3TL33	Uncharacterized protein OS=Mus musculus OX=10090 GN=Calu PE=2 SV=1	FALSE	TRUE	21.9048	7	9	1	78077005	19.63
High	Q8BMS1	Trifunctional enzyme subunit alpha, mitochondrial OS=Mus musculus OX=10090 GN=Hadha PE=1 SV=1	FALSE	TRUE	4.58716	3	5	3	6.07988e+07	13.53
High	Q3U741	Probable ATP-dependent RNA helicase DDX17 OS=Mus musculus OX=10090 GN=Ddx17 PE=1 SV=1	FALSE	TRUE	8.74233	5	7	3	8.43016e+06	17.23
High	P62751	60S ribosomal protein L23a OS=Mus musculus OX=10090 GN=Rpl23a PE=1 SV=1	FALSE	TRUE	27.5641	5	10	5	1.2235e+08	22.49
High	A0A0J9YUL3	Septin 11 OS=Mus musculus OX=10090 GN=Sept11 PE=1 SV=1	FALSE	TRUE	17.3611	6	7	3	4.63933e+07	14.78
High	P08228	Superoxide dismutase [Cu-Zn] OS=Mus musculus OX=10090 GN=Sod1 PE=1 SV=2	FALSE	TRUE	25.3247	3	6	3	3.38503e+07	15.82
High	A0A1S6GWH2	Uncharacterized protein OS=Mus musculus OX=10090 GN=Ddx39b PE=2 SV=1	FALSE	TRUE	11.3872	5	7	2	1.91881e+07	11.66
High	Q60865	Caprin-1 OS=Mus musculus OX=10090 GN=Caprin1 PE=1 SV=2	FALSE	TRUE	12.3055	5	6	5	2.65947e+07	17.48
High	Q5M9N9	Prdx2 protein OS=Mus musculus OX=10090 GN=Prdx2 PE=2 SV=1	FALSE	TRUE	31.3131	6	8	6	2.46693e+08	15.57
High	Q9WTI7	Unconventional myosin-Ic OS=Mus musculus OX=10090 GN=Myo1c PE=1 SV=2	FALSE	TRUE	6.96143	6	7	6	1.39482e+07	18.78
High	Q3U5U6	Heme oxygenase OS=Mus musculus OX=10090 GN=Hmox1 PE=1 SV=1	FALSE	TRUE	14.8789	3	5	3	2.3095e+07	10.58
High	Q91V41	Ras-related protein Rab-14 OS=Mus musculus OX=10090 GN=Rab14 PE=1 SV=3	FALSE	TRUE	30.2326	6	8	1	2.39514e+06	21.46
High	Q60932	Voltage-dependent anion-selective channel protein 1 OS=Mus musculus OX=10090 GN=Vdac1 PE=1 SV=3	FALSE	TRUE	21.9595	5	6	5	1.4752e+08	16.26
High	A0A286YD87	Growth arrest-specific protein 1 OS=Mus musculus OX=10090 GN=Gas1 PE=1 SV=1	FALSE	TRUE	18.2292	3	4	3	1.56178e+07	13.32
High	P47856	Glutamine--fructose-6-phosphate aminotransferase [isomerizing] 1 OS=Mus musculus OX=10090 GN=Gfpt1 PE=1 SV=3	FALSE	TRUE	9.32568	5	5	5	1.91672e+07	13.42
High	Q62446	Peptidyl-prolyl cis-trans isomerase FKBP3 OS=Mus musculus OX=10090 GN=Fkbp3 PE=1 SV=2	FALSE	TRUE	11.6071	2	3	2	3.4695e+07	8.89
High	Q9DCX2	ATP synthase subunit d, mitochondrial OS=Mus musculus OX=10090 GN=Atp5pd PE=1 SV=3	FALSE	TRUE	16.7702	3	6	3	1.84845e+07	18.24
High	Q9WVA3	Mitotic checkpoint protein BUB3 OS=Mus musculus OX=10090 GN=Bub3 PE=1 SV=2	FALSE	TRUE	20.8589	5	5	5	1.96206e+07	13.61
High	Q66JR7	Pgm2 protein (Fragment) OS=Mus musculus OX=10090 GN=Pgm1 PE=2 SV=1	FALSE	TRUE	13.7288	6	6	6	2.3719e+07	11.58
High	P47963	60S ribosomal protein L13 OS=Mus musculus OX=10090 GN=Rpl13 PE=1 SV=3	FALSE	TRUE	26.0664	6	8	6	1.12978e+08	14.82
High	Q8R050	Eukaryotic peptide chain release factor GTP-binding subunit ERF3A OS=Mus musculus OX=10090 GN=Gspt1 PE=1 SV=2	FALSE	TRUE	10.2201	6	10	6	2.05523e+07	20.46
High	Q3TE45	Succinate dehydrogenase [ubiquinone] iron-sulfur subunit, mitochondrial OS=Mus musculus OX=10090 GN=Sdhb PE=2 SV=1	FALSE	TRUE	11.3475	4	7	4	3.11978e+07	13.58
High	Q9ET54	Palladin OS=Mus musculus OX=10090 GN=Palld PE=1 SV=2	FALSE	TRUE	4.97159	6	6	6	2.70023e+07	13.45
High	O70251	Elongation factor 1-beta OS=Mus musculus OX=10090 GN=Eef1b PE=1 SV=5	FALSE	TRUE	15.1111	4	6	2	9.27365e+06	17.79
High	P63325	40S ribosomal protein S10 OS=Mus musculus OX=10090 GN=Rps10 PE=1 SV=1	FALSE	TRUE	13.3333	3	9	3	2.40939e+08	29.92
High	Q8BZY3	DEAD (Asp-Glu-Ala-Asp) box polypeptide 19b OS=Mus musculus OX=10090 GN=Ddx19b PE=1 SV=1	FALSE	TRUE	7.28745	3	4	3	1.3045e+07	10.5
High	P47758	Signal recognition particle receptor subunit beta OS=Mus musculus OX=10090 GN=Srprb PE=1 SV=1	FALSE	TRUE	17.1004	3	3	3	1.32522e+07	8.58
High	P48036	Annexin A5 OS=Mus musculus OX=10090 GN=Anxa5 PE=1 SV=1	FALSE	TRUE	17.2414	6	11	6	241016974	21.7
High	Q9CXW3	Calcyclin-binding protein OS=Mus musculus OX=10090 GN=Cacybp PE=1 SV=1	FALSE	TRUE	31.441	6	6	6	1.10586e+08	13.28
High	Q3UZH3	Uncharacterized protein (Fragment) OS=Mus musculus OX=10090 GN=Mthfd1 PE=2 SV=1	FALSE	TRUE	6.72359	6	6	6	3.62656e+07	12.44
High	Q3U4H0	Uncharacterized protein OS=Mus musculus OX=10090 GN=Mapre1 PE=1 SV=1	FALSE	TRUE	20.8955	4	4	3	8.2443e+06	11.28
High	Q3U2X5	Amine oxidase OS=Mus musculus OX=10090 GN=Maoa PE=2 SV=1	FALSE	TRUE	12.1673	6	8	6	5.35506e+06	10.26
High	P60766	Cell division control protein 42 homolog OS=Mus musculus OX=10090 GN=Cdc42 PE=1 SV=2	FALSE	TRUE	26.7016	5	7	4	3.4117e+07	10.92
High	Q3UJI2	WD_REPEATS_REGION domain-containing protein OS=Mus musculus OX=10090 GN=Rbbp7 PE=2 SV=1	FALSE	TRUE	13.6471	4	6	4	4.24806e+06	14.15
High	Q9CXW4	60S ribosomal protein L11 OS=Mus musculus OX=10090 GN=Rpl11 PE=1 SV=4	FALSE	TRUE	36.5169	6	8	6	3.07695e+08	15
High	Q9JMA1	Ubiquitin carboxyl-terminal hydrolase 14 OS=Mus musculus OX=10090 GN=Usp14 PE=1 SV=3	FALSE	TRUE	9.93915	3	5	3	1.29651e+07	12.6
High	Q9CQW9	Interferon-induced transmembrane protein 3 OS=Mus musculus OX=10090 GN=Ifitm3 PE=1 SV=1	FALSE	TRUE	26.2774	2	5	2	2.06508e+07	13.07
High	Q3TJF2	Obg-like ATPase 1 OS=Mus musculus OX=10090 GN=Ola1 PE=2 SV=1	FALSE	TRUE	16.9192	6	7	6	15966334	11.37
High	Q3T9L0	Uncharacterized protein OS=Mus musculus OX=10090 GN=Ddx39 PE=2 SV=1	FALSE	TRUE	10.7728	4	6	1	45569479	10.1
High	Q3TVV6	Uncharacterized protein OS=Mus musculus OX=10090 GN=Hnrnpu PE=2 SV=1	FALSE	TRUE	6	4	4	4	2.11985e+07	8.38
High	Q8R509	Polypirimidine tract binding protein OS=Mus musculus OX=10090 GN=Ptbp1 PE=2 SV=1	FALSE	TRUE	8.71212	4	6	1	5.02043e+06	8.74
High	Q8C266	Ras-related protein Rab-5C OS=Mus musculus OX=10090 GN=Rab5c PE=1 SV=1	FALSE	TRUE	23.9316	5	7	5	4.60595e+07	12.2
High	P70670	Nascent polypeptide-associated complex subunit alpha, muscle-specific form OS=Mus musculus OX=10090 GN=Naca PE=1 SV=2	FALSE	TRUE	1.92044	3	4	3	1.15875e+08	11.51
High	Q3TGE1	Uncharacterized protein OS=Mus musculus OX=10090 GN=Actr3 PE=2 SV=1	FALSE	TRUE	6.2201	3	4	3	5.72373e+07	12.58
High	A2A432	Cullin-4B OS=Mus musculus OX=10090 GN=Cul4b PE=1 SV=1	FALSE	TRUE	4.63918	4	4	4	9.52415e+06	10.64
High	Q544R5	TDP-43 variant 1 OS=Mus musculus OX=10090 GN=Tardbp PE=1 SV=1	FALSE	TRUE	14.4928	5	5	5	3.5309e+07	11.11
High	Q3U5L3	PX domain-containing protein OS=Mus musculus OX=10090 GN=Snx2 PE=2 SV=1	FALSE	TRUE	9.24855	4	4	3	10236038	10.95
High	Q91Z25	Actin-related protein 2/3 complex subunit OS=Mus musculus OX=10090 GN=Arpc1b PE=1 SV=1	FALSE	TRUE	16.7553	4	4	4	1.38079e+07	12.77
High	A2AUD5	Tumor protein D54 OS=Mus musculus OX=10090 GN=Tpd52l2 PE=1 SV=1	FALSE	TRUE	21.8341	4	5	4	1.68519e+07	14.49
High	Q8BFW7	Lipoma-preferred partner homolog OS=Mus musculus OX=10090 GN=Lpp PE=1 SV=1	FALSE	TRUE	12.398	4	4	4	1.00497e+07	13.6
High	P70677	Caspase-3 OS=Mus musculus OX=10090 GN=Casp3 PE=1 SV=1	FALSE	TRUE	22.0217	5	6	4	5.00702e+07	14.37
High	Q3TIC8	Uncharacterized protein OS=Mus musculus OX=10090 GN=Uqcrc1 PE=2 SV=1	FALSE	TRUE	11.0417	5	5	5	6.70691e+06	8.53
High	Q3UF16	Uncharacterized protein OS=Mus musculus OX=10090 GN=P4ha1 PE=2 SV=1	FALSE	TRUE	11.943	6	7	6	1.47058e+07	17.81
High	A2AM97	Ribosomal protein 10 OS=Mus musculus OX=10090 GN=RP23-436K3.4-001 PE=4 SV=1	FALSE	TRUE	25.2336	5	6	5	1.8403e+07	11.63
High	P61161	Actin-related protein 2 OS=Mus musculus OX=10090 GN=Actr2 PE=1 SV=1	FALSE	TRUE	9.39086	3	5	3	3.41106e+07	13.74
High	Q68FL4	Putative adenosylhomocysteinase 3 OS=Mus musculus OX=10090 GN=Ahcyl2 PE=1 SV=1	FALSE	TRUE	10.4405	6	8	5	2.20158e+07	17.7
High	P26443	Glutamate dehydrogenase 1, mitochondrial OS=Mus musculus OX=10090 GN=Glud1 PE=1 SV=1	FALSE	TRUE	10.3943	5	5	5	2.18504e+07	12.91
High	Q80V08	Rpl17 protein (Fragment) OS=Mus musculus OX=10090 GN=Rpl17 PE=2 SV=1	FALSE	TRUE	27.8351	5	6	5	7.59264e+07	10.33
High	P0C0S6	Histone H2A.Z OS=Mus musculus OX=10090 GN=H2az1 PE=1 SV=2	FALSE	TRUE	31.25	4	12	2	9.48831e+07	26.91
High	Q9Z2I8	Succinate--CoA ligase [GDP-forming] subunit beta, mitochondrial OS=Mus musculus OX=10090 GN=Suclg2 PE=1 SV=3	FALSE	TRUE	11.5473	4	5	4	3.23074e+07	12.11
High	P12763	Alpha-2-HS-glycoprotein OS=Bos taurus GN=AHSG PE=1 SV=2	TRUE	FALSE	16.9916	4	7	4	8.40295e+07	16.65
High	Q7Z3Y8	Keratin, type I cytoskeletal 27 OS=Homo sapiens GN=KRT27 PE=1 SV=2	TRUE	FALSE	8.49673	4	30	2	2.4047e+07	69.83
High	Q3TWH2	Uncharacterized protein OS=Mus musculus OX=10090 GN=Nnt PE=2 SV=1	FALSE	TRUE	4.05157	5	6	5	1.36729e+07	14.3
High	Q3THB0	RRM domain-containing protein OS=Mus musculus OX=10090 GN=Eif4b PE=2 SV=1	FALSE	TRUE	7.36498	3	7	3	2.14238e+07	17.89
High	Q3V122	DNA replication licensing factor MCM7 OS=Mus musculus OX=10090 GN=Mcm7 PE=2 SV=1	FALSE	TRUE	6.25	3	5	3	2.69398e+07	12.04
High	Q7RTS7	Keratin, type II cytoskeletal 74 OS=Homo sapiens GN=KRT74 PE=1 SV=2	TRUE	TRUE	7.18336	5	16	1	3063887944	35.56
High	P07339	Cathepsin D OS=Homo sapiens GN=CTSD PE=1 SV=1	TRUE	FALSE	17.4757	6	6	5	1.75224e+07	15.48
High	Q3TN61	Uncharacterized protein OS=Mus musculus OX=10090 GN=Rhoa PE=2 SV=1	FALSE	TRUE	23.8342	5	12	1	7.04304e+07	18.98
High	A0A0R4J083	Long-chain-specific acyl-CoA dehydrogenase, mitochondrial OS=Mus musculus OX=10090 GN=Acadl PE=1 SV=1	FALSE	TRUE	8.83721	3	4	3	8.71501e+07	10.76
High	Q3U8W9	Uncharacterized protein OS=Mus musculus OX=10090 GN=Hnrnpr PE=2 SV=1	FALSE	TRUE	9.17722	5	7	2	3.07332e+06	12.28
High	P28658	Ataxin-10 OS=Mus musculus OX=10090 GN=Atxn10 PE=1 SV=2	FALSE	TRUE	6.31579	2	3	2	3.82917e+07	9.87
High	A0A0N4SVP8	Eukaryotic translation initiation factor 4A3-like 2 OS=Mus musculus OX=10090 GN=Eif4a3l2 PE=3 SV=1	FALSE	TRUE	8.51582	3	6	1	1.23685e+07	12.88
High	Q9ER67	Maged2 protein OS=Mus musculus OX=10090 GN=Maged2 PE=1 SV=1	FALSE	TRUE	12.3377	5	5	5	7.30318e+06	9.14
High	Q3TN31	Proteasome subunit alpha type OS=Mus musculus OX=10090 GN=Psma7 PE=2 SV=1	FALSE	TRUE	19.3548	4	4	4	2.86609e+07	9.8
High	Q3U5I2	Uncharacterized protein OS=Mus musculus OX=10090 GN=Ptbp1 PE=2 SV=1	FALSE	TRUE	8.28829	4	5	1	26209188	8.53
High	P62075	Mitochondrial import inner membrane translocase subunit Tim13 OS=Mus musculus OX=10090 GN=Timm13 PE=1 SV=1	FALSE	TRUE	52.6316	4	4	4	3.59466e+07	10.65
High	Q3TQP7	Uncharacterized protein OS=Mus musculus OX=10090 GN=Acat1 PE=2 SV=1	FALSE	TRUE	11.7925	4	5	4	1.53179e+07	16.65
High	Q69ZN1	MKIAA1252 protein (Fragment) OS=Mus musculus OX=10090 GN=Sgpl1 PE=2 SV=1	FALSE	TRUE	5.29915	2	3	2	5.58451e+07	9.95
High	Q8K1X5	EH-domain containing 1 (Fragment) OS=Mus musculus OX=10090 GN=Ehd1 PE=2 SV=2	FALSE	TRUE	9.85401	5	9	4	1.18023e+07	20.72
High	Q3UJS6	Uncharacterized protein OS=Mus musculus OX=10090 GN=Cpne3 PE=2 SV=1	FALSE	TRUE	8.25516	5	6	5	1.33371e+07	10.97
High	A0A3Q4EI12	Ras-related protein Rab-18 OS=Mus musculus OX=10090 GN=Rab18 PE=1 SV=1	FALSE	TRUE	23.5849	4	4	4	3.78586e+07	11.38
High	O70456	14-3-3 protein sigma OS=Mus musculus OX=10090 GN=Sfn PE=1 SV=2	FALSE	TRUE	18.9516	5	17	3	1.18264e+08	27.07
High	Q9CZD3	Glycine--tRNA ligase OS=Mus musculus OX=10090 GN=Gars1 PE=1 SV=1	FALSE	TRUE	9.0535	7	8	7	49216476	12.17
High	P43277	Histone H1.3 OS=Mus musculus OX=10090 GN=H1-3 PE=1 SV=2	FALSE	TRUE	26.6968	6	6	1	342512682	15.02
High	Q3TJ43	Vacuolar protein sorting-associated protein 35 OS=Mus musculus OX=10090 GN=Vps35 PE=2 SV=1	FALSE	TRUE	6.40704	4	4	4	4.05386e+07	11.29
High	Q8CAY6	Acetyl-CoA acetyltransferase, cytosolic OS=Mus musculus OX=10090 GN=Acat2 PE=1 SV=2	FALSE	TRUE	10.8312	3	5	3	8.06477e+06	15.71
High	Q9D050	Mitochondrial carrier homolog 2 OS=Mus musculus OX=10090 GN=Mtch2 PE=1 SV=1	FALSE	TRUE	18.9103	6	8	6	5.93878e+07	12.86
High	A0A1Y7VKY1	Ribosomal protein S18, pseudogene 5 OS=Mus musculus OX=10090 GN=Rps18-ps5 PE=3 SV=1	FALSE	TRUE	26.9737	5	16	5	4.61024e+07	21.6
High	Q9DBS1	Transmembrane protein 43 OS=Mus musculus OX=10090 GN=Tmem43 PE=1 SV=1	FALSE	TRUE	11.25	4	5	4	8.34961e+07	9.64
High	Q9JMG1	Endothelial differentiation-related factor 1 OS=Mus musculus OX=10090 GN=Edf1 PE=1 SV=1	FALSE	TRUE	15.5405	2	3	2	3.66979e+07	9.33
High	P07742	Ribonucleoside-diphosphate reductase large subunit OS=Mus musculus OX=10090 GN=Rrm1 PE=1 SV=2	FALSE	TRUE	5.93434	4	4	4	1.55441e+07	10.33
High	Q5SUS9	RNA-binding protein EWS OS=Mus musculus OX=10090 GN=Ewsr1 PE=1 SV=1	FALSE	TRUE	4.99244	2	3	2	2.37357e+07	9.83
High	P28656	Nucleosome assembly protein 1-like 1 OS=Mus musculus OX=10090 GN=Nap1l1 PE=1 SV=2	FALSE	TRUE	6.90537	2	7	1	9945642	13.24
High	Q3UJ70	3-hydroxy-3-methylglutaryl coenzyme A synthase OS=Mus musculus OX=10090 GN=Hmgcs1 PE=2 SV=1	FALSE	TRUE	10.5769	5	7	5	7.18484e+07	15.71
High	P35492	Histidine ammonia-lyase OS=Mus musculus OX=10090 GN=Hal PE=1 SV=1	FALSE	TRUE	7.30594	4	7	4	1.0339e+07	15.2
High	Q8K354	Carbonyl reductase [NADPH] 3 OS=Mus musculus OX=10090 GN=Cbr3 PE=1 SV=1	FALSE	TRUE	14.8014	3	5	3	5.34703e+07	14.14
High	Q3TIP8	Chloride intracellular channel protein OS=Mus musculus OX=10090 GN=Clic1 PE=2 SV=1	FALSE	TRUE	16.1826	3	3	3	2.13574e+07	8.79
High	Q3UBZ3	F-actin-capping protein subunit alpha OS=Mus musculus OX=10090 GN=Capza2 PE=2 SV=1	FALSE	TRUE	19.5804	4	4	3	1.90564e+07	9.66
High	Q3TXD3	PKS_ER domain-containing protein OS=Mus musculus OX=10090 GN=Vat1 PE=2 SV=1	FALSE	TRUE	17.2414	4	6	4	2.36655e+07	13.57
High	Q8R038	Melanocyte proliferating gene 1 OS=Mus musculus OX=10090 GN=Myg1 PE=2 SV=1	FALSE	TRUE	13.4211	4	5	4	4.78941e+07	13.45
High	Q3UUU2	Far upstream element-binding protein 1 OS=Mus musculus OX=10090 GN=Fubp1 PE=1 SV=1	FALSE	TRUE	10.4286	6	7	5	1.36481e+07	13.08
High	Q61686	Chromobox protein homolog 5 OS=Mus musculus OX=10090 GN=Cbx5 PE=1 SV=1	FALSE	TRUE	18.8482	4	6	4	1.15146e+07	16.15
High	P42125	Enoyl-CoA delta isomerase 1, mitochondrial OS=Mus musculus OX=10090 GN=Eci1 PE=1 SV=2	FALSE	TRUE	17.301	4	4	4	2.12929e+07	11.65
High	P97371	Proteasome activator complex subunit 1 OS=Mus musculus OX=10090 GN=Psme1 PE=1 SV=2	FALSE	TRUE	15.6627	3	4	3	3.04582e+07	12.83
High	Q3U505	Dolichyl-diphosphooligosaccharide--protein glycosyltransferase subunit 2 (Fragment) OS=Mus musculus OX=10090 GN=Rpn2 PE=2 SV=1	FALSE	TRUE	6.0698	3	3	3	2.5126e+07	9.74
High	Q8CHG1	MKIAA0369 protein (Fragment) OS=Mus musculus OX=10090 GN=Dclk1 PE=2 SV=1	FALSE	TRUE	6.44753	4	4	4	31258629	11.2
High	A0A1L1STE6	Isocitrate dehydrogenase [NAD] subunit, mitochondrial OS=Mus musculus OX=10090 GN=Idh3a PE=1 SV=1	FALSE	TRUE	14.0625	5	5	5	1.68905e+07	13.18
High	Q91XH5	Sepiapterin reductase OS=Mus musculus OX=10090 GN=Spr PE=1 SV=1	FALSE	TRUE	20.9924	4	5	4	2.40993e+07	14.28
High	Q3TYJ0	Uncharacterized protein OS=Mus musculus OX=10090 GN=Stub1 PE=2 SV=1	FALSE	TRUE	19.0789	5	8	5	1.72847e+07	19.94
High	P54823	Probable ATP-dependent RNA helicase DDX6 OS=Mus musculus OX=10090 GN=Ddx6 PE=1 SV=1	FALSE	TRUE	11.5942	4	5	4	1.98525e+07	13.23
High	Q02013	Aquaporin-1 OS=Mus musculus OX=10090 GN=Aqp1 PE=1 SV=3	FALSE	TRUE	10.7807	2	5	2	8.91061e+07	14.99
High	Q3TCR9	Uncharacterized protein OS=Mus musculus OX=10090 GN=Zyx PE=2 SV=1	FALSE	TRUE	10.1064	4	5	4	3.48334e+06	13.38
High	Q3TJ21	Pyrroline-5-carboxylate reductase OS=Mus musculus OX=10090 GN=Pycr2 PE=2 SV=1	FALSE	TRUE	12.8125	3	5	2	8.96634e+06	11.4
High	Q6ZWX6	Eukaryotic translation initiation factor 2 subunit 1 OS=Mus musculus OX=10090 GN=Eif2s1 PE=1 SV=3	FALSE	TRUE	16.8254	5	6	5	1.17337e+07	12.14
High	Q3TTN3	Uncharacterized protein OS=Mus musculus OX=10090 GN=Vdac3 PE=2 SV=1	FALSE	TRUE	17.6678	4	5	4	1.98699e+07	12.4
High	P61358	60S ribosomal protein L27 OS=Mus musculus OX=10090 GN=Rpl27 PE=1 SV=2	FALSE	TRUE	30.1471	3	4	3	9.23057e+07	9.94
High	B2RPU8	SCAN domain containing 3 OS=Mus musculus OX=10090 GN=Zbed5 PE=1 SV=1	FALSE	TRUE	4.49735	2	3	2	6.12741e+07	11.84
High	P62858	40S ribosomal protein S28 OS=Mus musculus OX=10090 GN=Rps28 PE=1 SV=1	FALSE	TRUE	46.3768	3	9	3	1.01115e+07	17.59
High	Q99L45	Eukaryotic translation initiation factor 2 subunit 2 OS=Mus musculus OX=10090 GN=Eif2s2 PE=1 SV=1	FALSE	TRUE	17.5227	5	6	5	6.90322e+06	11.46
High	Q3UB60	Uncharacterized protein OS=Mus musculus OX=10090 GN=Ppid PE=2 SV=1	FALSE	TRUE	15.1351	7	8	7	4.59261e+07	17.21
High	Q9CZU6	Citrate synthase, mitochondrial OS=Mus musculus OX=10090 GN=Cs PE=1 SV=1	FALSE	TRUE	8.18966	4	9	4	6.16486e+07	17.92
High	P53994	Ras-related protein Rab-2A OS=Mus musculus OX=10090 GN=Rab2a PE=1 SV=1	FALSE	TRUE	24.5283	4	5	4	2.37613e+07	12.57
High	Q91V55	40S ribosomal protein S5 OS=Mus musculus OX=10090 GN=Rps5 PE=1 SV=1	FALSE	TRUE	26.9608	4	6	4	3.78882e+07	14.99
High	P70460	Vasodilator-stimulated phosphoprotein OS=Mus musculus OX=10090 GN=Vasp PE=1 SV=4	FALSE	TRUE	13.3333	3	4	3	7.30804e+06	11.04
High	P12382	ATP-dependent 6-phosphofructokinase, liver type OS=Mus musculus OX=10090 GN=Pfkl PE=1 SV=4	FALSE	TRUE	5.64103	3	3	3	2.09542e+07	9.11
High	A0A097PUG4	Anti-lox-1 15C4 light chain OS=Mus musculus OX=10090 PE=2 SV=1	FALSE	TRUE	7.14286	1	2	1		7.2
High	Q7TNC4	Putative RNA-binding protein Luc7-like 2 OS=Mus musculus OX=10090 GN=Luc7l2 PE=1 SV=1	FALSE	TRUE	11.7347	3	4	3	3.01201e+07	9.26
High	Q544Z7	DNA-(apurinic or apyrimidinic site) lyase OS=Mus musculus OX=10090 GN=Apex1 PE=1 SV=1	FALSE	TRUE	16.4038	4	6	4	5.1158e+07	7.33
High	Q3U1J4	DNA damage-binding protein 1 OS=Mus musculus OX=10090 GN=Ddb1 PE=1 SV=2	FALSE	TRUE	5.17544	4	4	4	1.3509e+07	10.68
High	P32067	Lupus La protein homolog OS=Mus musculus OX=10090 GN=Ssb PE=1 SV=1	FALSE	TRUE	9.15663	4	4	4	1.63073e+07	9.15
High	P62301	40S ribosomal protein S13 OS=Mus musculus OX=10090 GN=Rps13 PE=1 SV=2	FALSE	TRUE	32.4503	5	12	5	2.03305e+08	20.39
High	Q6ZWN5	40S ribosomal protein S9 OS=Mus musculus OX=10090 GN=Rps9 PE=1 SV=3	FALSE	TRUE	25.7732	7	14	7	4.32543e+08	26.65
High	Q62159	Rho-related GTP-binding protein RhoC OS=Mus musculus OX=10090 GN=Rhoc PE=1 SV=2	FALSE	TRUE	23.8342	5	12	1	5.26537e+06	18.93
High	Q0PD54	Rab6A OS=Mus musculus OX=10090 GN=Rab6a PE=2 SV=1	FALSE	TRUE	17.3077	3	7	1	5.39091e+06	14.66
High	P63168	Dynein light chain 1, cytoplasmic OS=Mus musculus OX=10090 GN=Dynll1 PE=1 SV=1	FALSE	TRUE	49.4382	3	5	3	2.65374e+07	7.81
High	P29533	Vascular cell adhesion protein 1 OS=Mus musculus OX=10090 GN=Vcam1 PE=1 SV=1	FALSE	TRUE	5.54804	4	4	4	1.78453e+07	10.73
High	Q3TDF8	eRF1_1 domain-containing protein OS=Mus musculus OX=10090 GN=Etf1 PE=2 SV=1	FALSE	TRUE	8.00915	3	3	3	2.42619e+07	7.8
High	P15864	Histone H1.2 OS=Mus musculus OX=10090 GN=H1-2 PE=1 SV=2	FALSE	TRUE	27.8302	6	7	1	1.05377e+07	17.53
High	Q3UI57	DNA helicase OS=Mus musculus OX=10090 GN=Mcm3 PE=1 SV=1	FALSE	TRUE	6.89655	4	4	4	8.65588e+06	11.57
High	Q3SZV7	Hemopexin OS=Bos taurus GN=HPX PE=2 SV=1	TRUE	FALSE	6.97168	2	3	2	5.18549e+07	9.79
High	Q7TMK9	Heterogeneous nuclear ribonucleoprotein Q OS=Mus musculus OX=10090 GN=Syncrip PE=1 SV=2	FALSE	TRUE	6.74157	4	6	1	1.33063e+07	12.12
High	E9Q1G8	Septin 7 OS=Mus musculus OX=10090 GN=Sept7 PE=1 SV=2	FALSE	TRUE	10.5263	4	5	4	6.45898e+07	10.41
High	O35646	Calpain-6 OS=Mus musculus OX=10090 GN=Capn6 PE=1 SV=2	FALSE	TRUE	3.74415	2	3	2	6.6661e+07	8.09
High	Q8K1L5	E3 ubiquitin-protein ligase PPP1R11 OS=Mus musculus OX=10090 GN=Ppp1r11 PE=1 SV=1	FALSE	TRUE	33.5878	3	6	3	1.09263e+07	21.65
High	P47791	Glutathione reductase, mitochondrial OS=Mus musculus OX=10090 GN=Gsr PE=1 SV=3	FALSE	TRUE	10	4	5	4	2.95172e+07	12.88
High	Q678L1	Keratin 1b (Fragment) OS=Mus musculus OX=10090 GN=Krt77 PE=2 SV=1	FALSE	TRUE	9.375	4	15	1	848193	25.11
High	Q9QYF1	Retinol dehydrogenase 11 OS=Mus musculus OX=10090 GN=Rdh11 PE=1 SV=2	FALSE	TRUE	17.0886	4	5	4	7.44955e+06	12.39
High	G5E829	Plasma membrane calcium-transporting ATPase 1 OS=Mus musculus OX=10090 GN=Atp2b1 PE=1 SV=1	FALSE	TRUE	3.77049	3	3	3		8.65
High	A0A140T8T4	Ribosomal protein L9, pseudogene 6 OS=Mus musculus OX=10090 GN=Rpl9-ps6 PE=4 SV=1	FALSE	TRUE	11.4583	2	6	2	1.19672e+08	10.87
High	Q3UD06	ATP synthase subunit gamma OS=Mus musculus OX=10090 GN=Atp5c1 PE=1 SV=1	FALSE	TRUE	16.7785	5	6	5	53933537	13.65
High	Q9CYL5	Golgi-associated plant pathogenesis-related protein 1 OS=Mus musculus OX=10090 GN=Glipr2 PE=1 SV=3	FALSE	TRUE	33.1169	4	4	4	6.34124e+06	10.67
High	A7E215	Rps6ka3 protein (Fragment) OS=Mus musculus OX=10090 GN=Rps6ka3 PE=2 SV=1	FALSE	TRUE	5.80297	4	4	4	5.30736e+06	5.84
High	G3UY93	Valine--tRNA ligase (Fragment) OS=Mus musculus OX=10090 GN=Vars PE=1 SV=1	FALSE	TRUE	2.42567	2	3	2	1.43625e+07	8.51
High	Q9DAW9	Calponin-3 OS=Mus musculus OX=10090 GN=Cnn3 PE=1 SV=1	FALSE	TRUE	13.9394	4	4	3	2.12594e+07	10.36
High	Q8VCT3	Aminopeptidase B OS=Mus musculus OX=10090 GN=Rnpep PE=1 SV=2	FALSE	TRUE	7.23077	3	4	3	8.12605e+06	10.25
High	Q9Z1K5	E3 ubiquitin-protein ligase ARIH1 OS=Mus musculus OX=10090 GN=Arih1 PE=1 SV=3	FALSE	TRUE	4.68468	2	3	2	1.12446e+07	5.18
High	B1AT82	Phosphoribosyl pyrophosphate synthase-associated protein 1 OS=Mus musculus OX=10090 GN=Prpsap1 PE=1 SV=1	FALSE	TRUE	7.53247	2	3	2	1.38425e+07	9.02
High	Q3TI05	Chaperonin containing Tcp1, subunit 6a (Zeta) OS=Mus musculus OX=10090 GN=Cct6a PE=2 SV=1	FALSE	TRUE	9.79284	4	4	4	2.11682e+07	11.08
High	Q9DD04	Uncharacterized protein OS=Mus musculus OX=10090 GN=Arf4 PE=2 SV=1	FALSE	TRUE	14.3646	2	6	1	3.22414e+06	15.57
High	Q3TI63	PX domain-containing protein OS=Mus musculus OX=10090 GN=Snx1 PE=2 SV=1	FALSE	TRUE	9.1954	4	5	3	8.135e+06	11.52
High	Q9WV55	Vesicle-associated membrane protein-associated protein A OS=Mus musculus OX=10090 GN=Vapa PE=1 SV=2	FALSE	TRUE	12.4498	2	4	1	5.6368e+06	11.92
High	Q6ZWU9	40S ribosomal protein S27 OS=Mus musculus OX=10090 GN=Rps27 PE=1 SV=3	FALSE	TRUE	38.0952	3	6	1		14.55
High	A0A3B2WBC6	DNA-directed RNA polymerase II subunit GRINL1A OS=Mus musculus OX=10090 GN=Polr2m PE=4 SV=1	FALSE	TRUE	28.5714	1	2	1	2.79378e+07	6.98
High	Q3V117	ATP-citrate synthase OS=Mus musculus OX=10090 GN=Acly PE=1 SV=1	FALSE	TRUE	4.26885	4	5	4	1.88888e+07	10.18
High	P48722	Heat shock 70 kDa protein 4L OS=Mus musculus OX=10090 GN=Hspa4l PE=1 SV=2	FALSE	TRUE	6.32458	4	5	3		13.41
High	Q8BP48	Methionine aminopeptidase 1 OS=Mus musculus OX=10090 GN=Metap1 PE=1 SV=1	FALSE	TRUE	10.6218	3	3	3	2.12789e+07	9.61
High	P15497	Apolipoprotein A-I OS=Bos taurus GN=APOA1 PE=1 SV=3	TRUE	FALSE	14.717	4	5	4	35658270	12.19
High	P62960	Y-box-binding protein 1 OS=Mus musculus OX=10090 GN=Ybx1 PE=1 SV=3	FALSE	TRUE	25.7764	4	4	4	4.25125e+06	11.89
High	P84084	ADP-ribosylation factor 5 OS=Mus musculus OX=10090 GN=Arf5 PE=1 SV=2	FALSE	TRUE	20	4	8	3	2.27466e+06	16.28
High	Q6P542	ATP-binding cassette sub-family F member 1 OS=Mus musculus OX=10090 GN=Abcf1 PE=1 SV=1	FALSE	TRUE	4.54002	3	4	3	7.29326e+06	13.73
High	P0DP27	Calmodulin-2 OS=Mus musculus OX=10090 GN=Calm2 PE=1 SV=1	FALSE	TRUE	20.8054	2	3	2	3.46228e+07	11.12
High	Q3UJN1	DNA helicase OS=Mus musculus OX=10090 GN=Mcm2 PE=2 SV=1	FALSE	TRUE	5.69551	4	4	4	1.56781e+07	11.81
High	Q3TK95	Uncharacterized protein OS=Mus musculus OX=10090 GN=Eif4e PE=1 SV=1	FALSE	TRUE	15.6682	3	4	3	2.41403e+07	7.02
High	Q9QZE5	Coatomer subunit gamma-1 OS=Mus musculus OX=10090 GN=Copg1 PE=1 SV=1	FALSE	TRUE	7.09382	5	6	5	1.64755e+07	10.74
High	Q3TGC5	Uncharacterized protein OS=Mus musculus OX=10090 GN=Pebp1 PE=2 SV=1	FALSE	TRUE	20.8556	2	3	2	6.48013e+07	10.01
High	Q3TUI9	Proteasome subunit alpha type OS=Mus musculus OX=10090 GN=Psma5 PE=2 SV=1	FALSE	TRUE	16.5975	3	3	3	10970106	10.2
High	Q60598	Src substrate cortactin OS=Mus musculus OX=10090 GN=Cttn PE=1 SV=2	FALSE	TRUE	8.24176	4	4	4	1.46917e+07	10.69
High	P68510	14-3-3 protein eta OS=Mus musculus OX=10090 GN=Ywhah PE=1 SV=2	FALSE	TRUE	21.9512	6	9	3	3.2708e+06	15.06
High	Q921L4	Histone H2B OS=Mus musculus OX=10090 GN=LOC665622 PE=2 SV=1	FALSE	TRUE	22.2222	4	11	2	3.51945e+08	25.19
High	Q9QZN4	F-box only protein 6 OS=Mus musculus OX=10090 GN=Fbxo6 PE=1 SV=1	FALSE	TRUE	12.8814	3	4	3	2.36051e+07	6.41
High	Q6ZPH4	MKIAA1835 protein (Fragment) OS=Mus musculus OX=10090 GN=Rangap1 PE=2 SV=1	FALSE	TRUE	7.58514	4	5	4	1.08015e+07	15.14
High	Q09163	Protein delta homolog 1 OS=Mus musculus OX=10090 GN=Dlk1 PE=1 SV=1	FALSE	TRUE	9.09091	4	6	4	2.49022e+07	9.91
High	P21460	Cystatin-C OS=Mus musculus OX=10090 GN=Cst3 PE=1 SV=2	FALSE	TRUE	19.2857	2	3	2	1.42532e+07	8.43
High	Q15843	NEDD8 OS=Homo sapiens GN=NEDD8 PE=1 SV=1	TRUE	TRUE	17.284	2	4	2	3.36088e+07	13.5
High	Q3TAH3	Nucleoplasmin domain-containing protein OS=Mus musculus OX=10090 GN=Npm3 PE=2 SV=1	FALSE	TRUE	18.2857	2	2	2	6.3924e+06	7.37
High	A0A3B2WCL5	Ran-binding protein 3 OS=Mus musculus OX=10090 GN=Ranbp3 PE=1 SV=1	FALSE	TRUE	7.34767	3	4	3	7.64778e+06	9.41
High	Q20BD0	Heterogeneous nuclear ribonucleoprotein A/B OS=Mus musculus OX=10090 GN=Hnrnpab PE=1 SV=1	FALSE	TRUE	13.5542	4	7	3	1.39319e+08	17.47
High	Q0PD53	Rab6B OS=Mus musculus OX=10090 GN=Rab6b PE=1 SV=1	FALSE	TRUE	17.3077	3	5	1	4.98659e+06	14.54
High	Q9ERG0	LIM domain and actin-binding protein 1 OS=Mus musculus OX=10090 GN=Lima1 PE=1 SV=3	FALSE	TRUE	7.03851	5	5	5	2.87023e+07	7.2
High	P62315	Small nuclear ribonucleoprotein Sm D1 OS=Mus musculus OX=10090 GN=Snrpd1 PE=1 SV=1	FALSE	TRUE	20.1681	2	3	2	4.13628e+07	8.61
High	A0A068BFR3	RAS oncogene family protein OS=Mus musculus OX=10090 GN=Rab11b PE=2 SV=1	FALSE	TRUE	24.7706	6	6	6	7.2573e+07	8.73
High	Q3U890	Uncharacterized protein OS=Mus musculus OX=10090 GN=Hars PE=2 SV=1	FALSE	TRUE	10.2161	5	5	5	3.14864e+07	9.92
High	Q9WUM3	Coronin-1B OS=Mus musculus OX=10090 GN=Coro1b PE=1 SV=1	FALSE	TRUE	12.8099	5	5	5	1.15982e+07	8.88
High	Q3URM4	Thioredoxin domain-containing protein OS=Mus musculus OX=10090 GN=Erp44 PE=2 SV=1	FALSE	TRUE	9.35961	3	3	3	5.58557e+06	8.05
High	Q3TWG2	EF-hand domain-containing protein OS=Mus musculus OX=10090 GN=Prkcsh PE=2 SV=1	FALSE	TRUE	4.41459	3	3	3	2.85792e+07	7.97
High	Q9DBG5	Perilipin-3 OS=Mus musculus OX=10090 GN=Plin3 PE=1 SV=1	FALSE	TRUE	3.20366	1	3	1	38297439	9.81
High	Q9Z0X1	Apoptosis-inducing factor 1, mitochondrial OS=Mus musculus OX=10090 GN=Aifm1 PE=1 SV=1	FALSE	TRUE	6.04575	3	4	3	1.20503e+07	10
High	A2ATU9	Histone acetyltransferase type B catalytic subunit OS=Mus musculus OX=10090 GN=Hat1 PE=1 SV=1	FALSE	TRUE	6.85579	2	2	2	9.52827e+06	6.26
High	Q6A0D0	MKIAA0106 protein (Fragment) OS=Mus musculus OX=10090 GN=Prdx6 PE=2 SV=1	FALSE	TRUE	21.5859	3	3	3	3.76459e+07	9.32
High	Q8BH59	Calcium-binding mitochondrial carrier protein Aralar1 OS=Mus musculus OX=10090 GN=Slc25a12 PE=1 SV=1	FALSE	TRUE	6.79468	4	4	3	1.54876e+07	9.32
High	A6H6H4	Thymosin beta OS=Mus musculus OX=10090 GN=Tmsb10 PE=1 SV=1	FALSE	TRUE	50	2	3	1	2.92531e+08	8.8
High	Q6UL10	AHNAK (Fragment) OS=Mus musculus OX=10090 GN=Ahnak PE=4 SV=1	FALSE	TRUE	4.5584	4	5	4	7.21548e+07	7.52
High	Q99J77	Sialic acid synthase OS=Mus musculus OX=10090 GN=Nans PE=1 SV=1	FALSE	TRUE	7.24234	2	2	2	1.68868e+07	6.04
High	Q571J7	Serine/threonine-protein phosphatase 2A 55 kDa regulatory subunit B (Fragment) OS=Mus musculus OX=10090 GN=Ppp2r2a PE=2 SV=1	FALSE	TRUE	4.51866	2	2	2	3.393e+07	6.58
High	Q9DAM7	Transmembrane protein 263 OS=Mus musculus OX=10090 GN=Tmem263 PE=1 SV=1	FALSE	TRUE	39.1304	3	3	3	1.42076e+07	8.09
High	Q9CQ60	6-phosphogluconolactonase OS=Mus musculus OX=10090 GN=Pgls PE=1 SV=1	FALSE	TRUE	14.0078	3	4	3	1.67361e+06	10.67
High	A2APM2	CD44 antigen OS=Mus musculus OX=10090 GN=Cd44 PE=1 SV=1	FALSE	TRUE	4.48718	2	3	2	9.12137e+06	6.74
High	P63085	Mitogen-activated protein kinase 1 OS=Mus musculus OX=10090 GN=Mapk1 PE=1 SV=3	FALSE	TRUE	12.0112	4	6	3	2.0809e+07	14.53
High	Q1RMN8	Immunoglobulin light chain, lambda gene cluster OS=Bos taurus GN=IGL@ PE=2 SV=1	TRUE	FALSE	13.2479	2	4	2	3.25864e+07	10.39
High	P07091	Protein S100-A4 OS=Mus musculus OX=10090 GN=S100a4 PE=1 SV=1	FALSE	TRUE	25.7426	4	7	4	1.61425e+08	7.16
High	P80313	T-complex protein 1 subunit eta OS=Mus musculus OX=10090 GN=Cct7 PE=1 SV=1	FALSE	TRUE	6.43382	3	4	3	7.31328e+06	5.74
High	Q3UJV2	F-actin-capping protein subunit alpha OS=Mus musculus OX=10090 GN=Capza1 PE=2 SV=1	FALSE	TRUE	13.7931	3	3	2	1.03752e+06	8.77
High	Q571F9	MKIAA4115 protein (Fragment) OS=Mus musculus OX=10090 GN=G3bp1 PE=2 SV=1	FALSE	TRUE	11.2871	4	6	4	2.55362e+07	12.44
High	Q9QZ88	Vacuolar protein sorting-associated protein 29 OS=Mus musculus OX=10090 GN=Vps29 PE=1 SV=1	FALSE	TRUE	19.7802	3	3	3	1.56685e+07	7.69
High	O55234	Proteasome subunit beta type-5 OS=Mus musculus OX=10090 GN=Psmb5 PE=1 SV=3	FALSE	TRUE	13.6364	3	4	3	1.33312e+07	10.84
High	Q3TWT2	Uncharacterized protein OS=Mus musculus OX=10090 GN=Memo1 PE=2 SV=1	FALSE	TRUE	12.5828	4	5	4	2.40467e+07	4.73
High	Q3UNH3	PITH domain-containing protein (Fragment) OS=Mus musculus OX=10090 GN=Txnl1 PE=2 SV=1	FALSE	TRUE	11.2957	2	2	2	64682393	7.56
High	Q921J3	Dnajc5 protein OS=Mus musculus OX=10090 GN=Dnajc5 PE=2 SV=1	FALSE	TRUE	6.86275	1	2	1	29867031	6.61
High	Q8BH64	EH domain-containing protein 2 OS=Mus musculus OX=10090 GN=Ehd2 PE=1 SV=1	FALSE	TRUE	3.8674	2	6	1	5.60284e+07	13.61
High	Q9DBF1	Alpha-aminoadipic semialdehyde dehydrogenase OS=Mus musculus OX=10090 GN=Aldh7a1 PE=1 SV=4	FALSE	TRUE	5.75139	2	2	2	19847685	5.68
High	Q6PGB6	N-alpha-acetyltransferase 50 OS=Mus musculus OX=10090 GN=Naa50 PE=1 SV=1	FALSE	TRUE	13.6095	2	3	2	3.50848e+07	2.98
High	Q9CQ62	2,4-dienoyl-CoA reductase, mitochondrial OS=Mus musculus OX=10090 GN=Decr1 PE=1 SV=1	FALSE	TRUE	13.1343	3	3	3	1.30555e+06	8.28
High	Q4VAG4	Ribosomal protein L22 OS=Mus musculus OX=10090 GN=Rpl22 PE=1 SV=1	FALSE	TRUE	23.4375	3	4	3	7.75553e+07	9.69
High	P35235	Tyrosine-protein phosphatase non-receptor type 11 OS=Mus musculus OX=10090 GN=Ptpn11 PE=1 SV=3	FALSE	TRUE	7.75717	4	4	4	7.3528e+06	6.79
High	G3X928	SEC23-interacting protein OS=Mus musculus OX=10090 GN=Sec23ip PE=1 SV=1	FALSE	TRUE	3.00601	2	3	2	11843127	8
High	P62774	Myotrophin OS=Mus musculus OX=10090 GN=Mtpn PE=1 SV=2	FALSE	TRUE	14.4068	1	3	1	1.20076e+08	10.78
High	P22629	Streptavidin OS=Streptomyces avidinii PE=1 SV=1	TRUE	FALSE	10.3825	1	2	1	9.35786e+07	7.19
High	Q3THE2	Myosin regulatory light chain 12B OS=Mus musculus OX=10090 GN=Myl12b PE=1 SV=2	FALSE	TRUE	17.4419	3	4	3	1.08348e+07	10.5
High	Q6NZJ6	Eukaryotic translation initiation factor 4 gamma 1 OS=Mus musculus OX=10090 GN=Eif4g1 PE=1 SV=1	FALSE	TRUE	2.625	3	3	3	2.70677e+07	9.03
High	O09131	Glutathione S-transferase omega-1 OS=Mus musculus OX=10090 GN=Gsto1 PE=1 SV=2	FALSE	TRUE	14.5833	5	9	5	1.08839e+08	21.48
High	Q8BKG3	Inactive tyrosine-protein kinase 7 OS=Mus musculus OX=10090 GN=Ptk7 PE=1 SV=1	FALSE	TRUE	3.38983	3	3	3	2.04958e+07	7.72
High	A0A0R4J0G0	Phosphoenolpyruvate carboxykinase [GTP], mitochondrial OS=Mus musculus OX=10090 GN=Pck2 PE=1 SV=1	FALSE	TRUE	5.84708	3	4	3	6.75552e+06	10.85
High	O70503	Very-long-chain 3-oxoacyl-CoA reductase OS=Mus musculus OX=10090 GN=Hsd17b12 PE=1 SV=1	FALSE	TRUE	8.01282	2	3	2	1.02721e+08	4.41
High	P04040	Catalase OS=Homo sapiens GN=CAT PE=1 SV=3	TRUE	FALSE	8.72865	4	4	3	1.10538e+07	7.41
High	Q3TAW4	Protein transport protein SEC23 OS=Mus musculus OX=10090 GN=Sec23b PE=2 SV=1	FALSE	TRUE	4.04172	2	3	2	1.54811e+07	10.29
High	O70435	Proteasome subunit alpha type-3 OS=Mus musculus OX=10090 GN=Psma3 PE=1 SV=3	FALSE	TRUE	10.1961	3	4	3	1.95675e+07	4.88
High	Q7TPV4	Myb-binding protein 1A OS=Mus musculus OX=10090 GN=Mybbp1a PE=1 SV=2	FALSE	TRUE	1.78571	2	5	2	1.19998e+07	11.16
High	P14069	Protein S100-A6 OS=Mus musculus OX=10090 GN=S100a6 PE=1 SV=3	FALSE	TRUE	24.7191	3	7	3	4.62334e+06	10.94
High	Q8BKE6	Cytochrome P450 20A1 OS=Mus musculus OX=10090 GN=Cyp20a1 PE=1 SV=1	FALSE	TRUE	6.27706	2	3	2	1.48658e+07	9
High	Q91WS0	CDGSH iron-sulfur domain-containing protein 1 OS=Mus musculus OX=10090 GN=Cisd1 PE=1 SV=1	FALSE	TRUE	31.4815	3	3	3	8.46443e+06	6.59
High	Q9D7S7	60S ribosomal protein L22-like 1 OS=Mus musculus OX=10090 GN=Rpl22l1 PE=1 SV=1	FALSE	TRUE	19.6721	2	4	2	1.76052e+07	6.78
High	P11983	T-complex protein 1 subunit alpha OS=Mus musculus OX=10090 GN=Tcp1 PE=1 SV=3	FALSE	TRUE	7.91367	4	5	4	1.66143e+07	8.11
High	Q8BH95	Enoyl-CoA hydratase, mitochondrial OS=Mus musculus OX=10090 GN=Echs1 PE=1 SV=1	FALSE	TRUE	8.27586	2	3	2	2.55508e+07	7.91
High	Q7TQI3	Ubiquitin thioesterase OTUB1 OS=Mus musculus OX=10090 GN=Otub1 PE=1 SV=2	FALSE	TRUE	15.4982	3	3	3	4.78486e+07	7.77
High	A0A1S6GWG6	Vacuolar proton pump subunit B OS=Mus musculus OX=10090 GN=Atp6v1b2 PE=2 SV=1	FALSE	TRUE	2.22222	2	5	2	8.81546e+06	9.95
High	O08749	Dihydrolipoyl dehydrogenase, mitochondrial OS=Mus musculus OX=10090 GN=Dld PE=1 SV=2	FALSE	TRUE	8.6444	4	5	4	1.18061e+07	9.23
High	P06745	Glucose-6-phosphate isomerase OS=Mus musculus OX=10090 GN=Gpi PE=1 SV=4	TRUE	TRUE	8.78136	4	5	4	3.06891e+07	9.49
High	Q8BH80	Vesicle-associated membrane protein, associated protein B and C OS=Mus musculus OX=10090 GN=Vapb PE=1 SV=1	FALSE	TRUE	15.6379	3	5	2	1.17837e+07	11.84
High	P0C7N9	Proteasome assembly chaperone 4 OS=Mus musculus OX=10090 GN=Psmg4 PE=1 SV=1	FALSE	TRUE	12.1951	1	2	1	4.80838e+06	7.17
High	Q3TWB8	Transmembrane 9 superfamily member OS=Mus musculus OX=10090 GN=Tm9sf2 PE=2 SV=1	FALSE	TRUE	4.92537	3	4	3	9.34623e+06	7.39
High	E9PV14	Band 4.1-like protein 1 OS=Mus musculus OX=10090 GN=Epb41l1 PE=1 SV=2	FALSE	TRUE	1.41388	2	3	1	3.07361e+06	5.12
High	Q8CIJ3	Eukaryotic translation initiation factor 3 subunit B OS=Mus musculus OX=10090 GN=Eif3b PE=2 SV=1	FALSE	TRUE	6.49485	5	5	5	2.46111e+06	9.99
High	Q3TG52	Aldedh domain-containing protein OS=Mus musculus OX=10090 GN=Aldh9a1 PE=2 SV=1	FALSE	TRUE	6.56371	3	4	3	2.75612e+08	10.05
High	Q8BFY9	Transportin-1 OS=Mus musculus OX=10090 GN=Tnpo1 PE=1 SV=2	FALSE	TRUE	6.12472	4	4	4	5.76523e+06	10.06
High	P16125	L-lactate dehydrogenase B chain OS=Mus musculus OX=10090 GN=Ldhb PE=1 SV=2	FALSE	TRUE	8.38323	2	2	1	4.66431e+07	3.7
High	Q8BP47	Asparagine--tRNA ligase, cytoplasmic OS=Mus musculus OX=10090 GN=NARS1 PE=1 SV=2	FALSE	TRUE	8.40787	4	4	4	1.35678e+07	9.49
High	Q91W90	Thioredoxin domain-containing protein 5 OS=Mus musculus OX=10090 GN=Txndc5 PE=1 SV=2	FALSE	TRUE	12.9496	4	4	4	4.9939e+06	6.6
High	O08638	Myosin-11 OS=Mus musculus OX=10090 GN=Myh11 PE=1 SV=1	FALSE	TRUE	2.18053	4	5	1		11.96
High	A2AB79	Histone H2A OS=Mus musculus OX=10090 GN=H2aw PE=2 SV=1	FALSE	TRUE	32.3077	4	11	2	1.37326e+07	24.94
High	P24472	Glutathione S-transferase A4 OS=Mus musculus OX=10090 GN=Gsta4 PE=1 SV=3	FALSE	TRUE	11.2613	2	7	2	4.26267e+07	19.76
High	Q8K1M3	Protein kinase, cAMP dependent regulatory, type II alpha OS=Mus musculus OX=10090 GN=Prkar2a PE=1 SV=1	FALSE	TRUE	4.72637	2	3	2	1.21459e+07	4.64
High	A0A5F8MPK9	Phosphatidylinositide phosphatase SAC1 OS=Mus musculus OX=10090 GN=Sacm1l PE=4 SV=1	FALSE	TRUE	5.09031	3	4	3	2.44282e+07	6.84
High	Q8R1F1	Protein Niban 2 OS=Mus musculus OX=10090 GN=Niban2 PE=1 SV=2	FALSE	TRUE	3.60481	3	4	3	2.77095e+07	5.68
High	G3X9T7	Galectin-9 OS=Mus musculus OX=10090 GN=Lgals9 PE=1 SV=1	FALSE	TRUE	9.06516	3	3	3	6.46591e+06	7.58
High	Q9Z1Z0	General vesicular transport factor p115 OS=Mus musculus OX=10090 GN=Uso1 PE=1 SV=2	FALSE	TRUE	2.50261	2	2	2	1.38107e+07	5.9
High	G5DDB7	Phosphoinositide phospholipase C OS=Mus musculus OX=10090 GN=Plcd1 PE=1 SV=1	FALSE	TRUE	4.98721	3	3	3	1.18001e+07	8.53
High	Q9D8L3	Signal sequence receptor, delta OS=Mus musculus OX=10090 GN=Ssr4 PE=1 SV=1	FALSE	TRUE	7.51445	1	2	1	8.47797e+06	6.26
High	P61089	Ubiquitin-conjugating enzyme E2 N OS=Mus musculus OX=10090 GN=Ube2n PE=1 SV=1	FALSE	TRUE	20.3947	4	6	4	8.84561e+07	11.68
High	Q9CRD2	ER membrane protein complex subunit 2 OS=Mus musculus OX=10090 GN=Emc2 PE=1 SV=1	FALSE	TRUE	8.08081	2	2	2		6.02
High	Q9D1J3	SAP domain-containing ribonucleoprotein OS=Mus musculus OX=10090 GN=Sarnp PE=1 SV=3	FALSE	TRUE	11.4286	2	4	2	5.90037e+06	9.73
High	P08030	Adenine phosphoribosyltransferase OS=Mus musculus OX=10090 GN=Aprt PE=1 SV=2	FALSE	TRUE	26.1111	4	4	4	2.93455e+07	4.52
High	Q3TJ01	tRNA-splicing ligase RtcB homolog OS=Mus musculus OX=10090 GN=Rtcb PE=2 SV=1	FALSE	TRUE	9.30693	4	5	4	7.88483e+06	11.62
High	P62897	Cytochrome c, somatic OS=Mus musculus OX=10090 GN=Cycs PE=1 SV=2	FALSE	TRUE	44.7619	5	7	5	1.0379e+08	11.43
High	Q15323	Keratin, type I cuticular Ha1 OS=Homo sapiens GN=KRT31 PE=2 SV=3	TRUE	FALSE	7.45192	3	10	2	1.04752e+07	17.09
High	Q8K009	Mitochondrial 10-formyltetrahydrofolate dehydrogenase OS=Mus musculus OX=10090 GN=Aldh1l2 PE=1 SV=2	FALSE	TRUE	4.87541	3	3	3	2.01487e+07	8.69
High	Q3U4U6	T-complex protein 1 subunit gamma OS=Mus musculus OX=10090 GN=Cct3 PE=1 SV=1	FALSE	TRUE	8.07339	4	4	4	1.575e+07	10.51
High	E9PV22	Leucine-rich repeat-containing protein 47 OS=Mus musculus OX=10090 GN=Lrrc47 PE=1 SV=1	FALSE	TRUE	2.32172	1	2	1	27597744	6.19
High	Q3UDS4	Pyr_redox_2 domain-containing protein OS=Mus musculus OX=10090 GN=Sqor PE=2 SV=1	FALSE	TRUE	6.44444	2	3	2	1.99915e+07	9.45
High	Q4FZH2	Ribosomal protein L26 OS=Mus musculus OX=10090 GN=Rpl26 PE=1 SV=1	FALSE	TRUE	32.4138	6	8	6	170205598	10.55
High	P19783	Cytochrome c oxidase subunit 4 isoform 1, mitochondrial OS=Mus musculus OX=10090 GN=Cox4i1 PE=1 SV=2	FALSE	TRUE	18.9349	3	5	3	3.34716e+07	11.44
High	Q8C7R4	Ubiquitin-like modifier-activating enzyme 6 OS=Mus musculus OX=10090 GN=Uba6 PE=1 SV=1	FALSE	TRUE	2.75404	3	3	3		7.45
High	Q60668	Heterogeneous nuclear ribonucleoprotein D0 OS=Mus musculus OX=10090 GN=Hnrnpd PE=1 SV=2	FALSE	TRUE	6.76056	2	4	1	184789828	11.71
High	Q3THA0	Eukaryotic translation initiation factor 3 subunit G OS=Mus musculus OX=10090 GN=Eif3g PE=2 SV=1	FALSE	TRUE	11.875	3	3	3	3.0812e+07	8.85
High	A0A338P6F6	High mobility group protein HMG-I/HMG-Y OS=Mus musculus OX=10090 GN=Hmga1 PE=1 SV=1	FALSE	TRUE	27.9661	3	7	1	1.60299e+07	16.75
High	P32020	Non-specific lipid-transfer protein OS=Mus musculus OX=10090 GN=Scp2 PE=1 SV=3	FALSE	TRUE	5.48446	3	3	3	5.17188e+06	6.94
High	Q4KL76	Heat shock protein 1 (Chaperonin 10) OS=Mus musculus OX=10090 GN=Hspe1 PE=1 SV=1	FALSE	TRUE	33.3333	3	6	3	2.63537e+08	14.61
High	O08738	Caspase-6 OS=Mus musculus OX=10090 GN=Casp6 PE=1 SV=1	FALSE	TRUE	10.1449	3	5	2	3.48382e+07	8.52
High	Q8C5X6	Flap endonuclease 1 OS=Mus musculus OX=10090 GN=Fen1 PE=2 SV=1	FALSE	TRUE	9.24574	3	3	3	3.04257e+07	8.29
High	Q04750	DNA topoisomerase 1 OS=Mus musculus OX=10090 GN=Top1 PE=1 SV=2	FALSE	TRUE	4.30248	3	3	3	1.40705e+07	6.82
High	E9PZC3	Flavin reductase (NADPH) OS=Mus musculus OX=10090 GN=Blvrb PE=1 SV=1	FALSE	TRUE	18.6235	3	3	3	9.4195e+07	8.02
High	Q3UDE2	Tubulin--tyrosine ligase-like protein 12 OS=Mus musculus OX=10090 GN=Ttll12 PE=1 SV=1	FALSE	TRUE	7.19875	4	4	4	8.22708e+06	6.97
High	Q3TEU8	Coronin OS=Mus musculus OX=10090 GN=Coro1c PE=2 SV=1	FALSE	TRUE	6.96203	3	3	3	1.07135e+07	4.39
High	P02754	Beta-lactoglobulin OS=Bos taurus GN=LGB PE=1 SV=3	TRUE	FALSE	16.2921	4	4	4	5.35875e+06	8.82
High	Q6ZQI3	Malectin OS=Mus musculus OX=10090 GN=Mlec PE=1 SV=2	FALSE	TRUE	14.433	3	7	3	3.48216e+07	19.44
High	O08539	Myc box-dependent-interacting protein 1 OS=Mus musculus OX=10090 GN=Bin1 PE=1 SV=1	FALSE	TRUE	6.29252	2	3	2	1.75318e+07	13.59
High	A0A140T8J4	Heme-binding protein 1 OS=Mus musculus OX=10090 GN=Hebp1 PE=1 SV=1	FALSE	TRUE	15.7895	2	2	2	2.85728e+07	5.63
High	Q9CZ04	COP9 signalosome complex subunit 7a OS=Mus musculus OX=10090 GN=Cops7a PE=1 SV=2	FALSE	TRUE	15.2727	3	3	3	6.55249e+06	7.81
High	O89023	Tripeptidyl-peptidase 1 OS=Mus musculus OX=10090 GN=Tpp1 PE=1 SV=2	FALSE	TRUE	2.4911	1	2	1	1.48712e+07	6.46
High	B2RRT9	Zinc finger Ran-binding domain-containing protein 2 OS=Mus musculus OX=10090 GN=Zranb2 PE=1 SV=1	FALSE	TRUE	8.48485	2	3	2	1.89853e+07	8.69
High	Q3TVT6	Prenylcys_lyase domain-containing protein OS=Mus musculus OX=10090 GN=Pcyox1 PE=2 SV=1	FALSE	TRUE	2.37624	1	3	1	7.4146e+06	7.16
High	Q3UHW9	ADF-H domain-containing protein OS=Mus musculus OX=10090 GN=Cfl2 PE=1 SV=1	FALSE	TRUE	22.2892	4	6	1		13.08
High	Q9ERK4	Exportin-2 OS=Mus musculus OX=10090 GN=Cse1l PE=1 SV=1	FALSE	TRUE	3.8105	3	3	3	1.49421e+07	7.54
High	A2AFQ2	3-hydroxyacyl-CoA dehydrogenase type-2 OS=Mus musculus OX=10090 GN=Hsd17b10 PE=1 SV=1	FALSE	TRUE	21.4022	4	4	4	4.05852e+07	9.87
High	Q7TSV4	Phosphoglucomutase-2 OS=Mus musculus OX=10090 GN=Pgm2 PE=1 SV=1	FALSE	TRUE	5	3	3	3	2.03532e+07	7.78
High	Q3UI33	Methionine aminopeptidase 2 OS=Mus musculus OX=10090 GN=Metap2 PE=1 SV=1	FALSE	TRUE	4.5082	2	3	2	1.80879e+07	7.11
High	Q9Z1F9	SUMO-activating enzyme subunit 2 OS=Mus musculus OX=10090 GN=Uba2 PE=1 SV=1	FALSE	TRUE	5.17241	2	2	2	1.43781e+07	6.74
High	Q3UJW9	Aldo_ket_red domain-containing protein OS=Mus musculus OX=10090 GN=Akr1a1 PE=2 SV=1	FALSE	TRUE	14.1538	4	4	4	1.8573e+07	10.09
High	Q80TP8	MKIAA0885 protein (Fragment) OS=Mus musculus OX=10090 GN=Csde1 PE=2 SV=1	FALSE	TRUE	6.691	5	5	5	9.70848e+06	7.3
High	Q3TGQ3	Uncharacterized protein OS=Mus musculus OX=10090 GN=Ctnna1 PE=2 SV=1	FALSE	TRUE	3.31126	2	2	2	2.82175e+06	5.43
High	Q5I0T8	Ribosomal protein L19 OS=Mus musculus OX=10090 GN=Rpl19 PE=1 SV=1	FALSE	TRUE	13.2653	2	2	2	4.70678e+06	3.27
High	Q3TMJ8	Mitogen activated protein kinase kinase 1 OS=Mus musculus OX=10090 GN=Map2k1 PE=1 SV=1	FALSE	TRUE	3.05344	1	2	1	1.88287e+07	6.52
High	Q3U7D2	Ribosomal protein L15 OS=Mus musculus OX=10090 GN=Rpl15 PE=2 SV=1	FALSE	TRUE	14.7059	3	3	3	4.86421e+06	4.51
High	Q9R0Q3	Transmembrane emp24 domain-containing protein 2 OS=Mus musculus OX=10090 GN=Tmed2 PE=1 SV=1	FALSE	TRUE	10.4478	2	3	2	1.83567e+07	7.79
High	Q61490	CD166 antigen OS=Mus musculus OX=10090 GN=Alcam PE=1 SV=3	FALSE	TRUE	5.48885	3	3	3	1.50178e+07	7.76
High	G3X9M0	28S ribosomal protein S29, mitochondrial OS=Mus musculus OX=10090 GN=Dap3 PE=1 SV=1	FALSE	TRUE	5.80808	2	2	2	8.96261e+06	5.18
High	Q3UHJ0	AP2-associated protein kinase 1 OS=Mus musculus OX=10090 GN=Aak1 PE=1 SV=2	FALSE	TRUE	3.02398	1	1	1		6.23
High	Q3U7E0	V-type proton ATPase subunit G OS=Mus musculus OX=10090 GN=Atp6v1g1 PE=2 SV=1	FALSE	TRUE	25.4237	3	3	3	1.2945e+07	8.37
High	Q9CYD3	Cartilage-associated protein OS=Mus musculus OX=10090 GN=Crtap PE=1 SV=3	FALSE	TRUE	12	4	5	4	1.1782e+07	8.9
High	B0QZN5	Vesicle-associated membrane protein 2 OS=Mus musculus OX=10090 GN=Vamp2 PE=1 SV=1	FALSE	TRUE	10.4294	1	3	1	4.83849e+07	10.63
High	Q3U9U5	Uncharacterized protein OS=Mus musculus OX=10090 GN=Bcap31 PE=2 SV=1	FALSE	TRUE	17.551	3	5	3	4.79174e+06	10.51
High	Q3UVI9	Uncharacterized protein OS=Mus musculus OX=10090 GN=Abcf2 PE=2 SV=1	FALSE	TRUE	4.14013	2	2	2	1.51128e+07	6.02
High	Q3TED1	S-adenosylmethionine synthase OS=Mus musculus OX=10090 GN=Mat2a PE=2 SV=1	FALSE	TRUE	8.86076	3	3	3	2.77943e+06	8.56
High	P62852	40S ribosomal protein S25 OS=Mus musculus OX=10090 GN=Rps25 PE=1 SV=1	FALSE	TRUE	29.6	4	7	4	5.01687e+08	12.91
High	P23198	Chromobox protein homolog 3 OS=Mus musculus OX=10090 GN=Cbx3 PE=1 SV=2	FALSE	TRUE	21.3115	3	5	3	646892753	11.91
High	Q3TI07	Uncharacterized protein OS=Mus musculus OX=10090 GN=Capn1 PE=1 SV=1	FALSE	TRUE	5.75035	3	4	3	1.41503e+07	10.09
High	Q3UEB3	Poly(U)-binding-splicing factor PUF60 OS=Mus musculus OX=10090 GN=Puf60 PE=1 SV=2	FALSE	TRUE	2.83688	1	2	1		6.7
High	Q3UJL7	PABS domain-containing protein OS=Mus musculus OX=10090 GN=Srm PE=2 SV=1	FALSE	TRUE	15.5629	3	3	3	1.14519e+07	9.29
High	Q922J9	Fatty acyl-CoA reductase 1 OS=Mus musculus OX=10090 GN=Far1 PE=1 SV=1	FALSE	TRUE	4.85437	2	2	2	8.97691e+06	6.62
High	Q8C5R4	Uncharacterized protein OS=Mus musculus OX=10090 GN=Parva PE=2 SV=1	FALSE	TRUE	8.06452	2	3	2	2662462	9.43
High	P27546	Microtubule-associated protein 4 OS=Mus musculus OX=10090 GN=Map4 PE=1 SV=3	FALSE	TRUE	4.97778	4	4	4	1.53814e+07	9.63
High	A0A5F8MPN8	Malate dehydrogenase, cytoplasmic OS=Mus musculus OX=10090 GN=Mdh1 PE=4 SV=1	FALSE	TRUE	7.04225	2	2	2	2.9883e+07	5.64
High	Q99LB6	Methionine adenosyltransferase 2 subunit beta OS=Mus musculus OX=10090 GN=Mat2b PE=1 SV=1	FALSE	TRUE	14.9701	3	3	3	6.94003e+06	10.14
High	Q91YH5	Atlastin-3 OS=Mus musculus OX=10090 GN=Atl3 PE=1 SV=1	FALSE	TRUE	5.36044	2	2	2	2.30184e+06	3.49
High	D3YUE2	Procollagen C-endopeptidase enhancer 1 OS=Mus musculus OX=10090 GN=Pcolce PE=1 SV=1	FALSE	TRUE	6.69371	3	3	3	2.31899e+07	8.48
High	A0A4E9G461	IgG2 (Fragment) OS=Mus musculus OX=10090 GN=IGHG2 PE=4 SV=1	FALSE	TRUE	13.5385	4	4	4	2.09029e+07	7.21
High	Q66JS6	Eukaryotic translation initiation factor 3 subunit J-B OS=Mus musculus OX=10090 GN=Eif3j2 PE=1 SV=1	FALSE	TRUE	8.74525	2	2	2	9.43735e+06	5.8
High	Q4VAI2	Acid phosphatase 1, soluble OS=Mus musculus OX=10090 GN=Acp1 PE=2 SV=1	FALSE	TRUE	17.0886	2	2	2	6.1338e+07	5.14
High	P30285	Cyclin-dependent kinase 4 OS=Mus musculus OX=10090 GN=Cdk4 PE=1 SV=1	FALSE	TRUE	14.8515	3	3	3	1.55225e+07	8.74
High	Q6NSP9	High mobility group protein HMGI-C OS=Mus musculus OX=10090 GN=Hmga2 PE=1 SV=1	FALSE	TRUE	34.1085	3	7	3	1.43054e+07	16.02
High	B9EKJ7	Tankyrase 1 binding protein 1 OS=Mus musculus OX=10090 GN=Tnks1bp1 PE=2 SV=1	FALSE	TRUE	2.32558	3	3	3	7.62805e+06	8.16
High	Q9JMD0	BUB3-interacting and GLEBS motif-containing protein ZNF207 OS=Mus musculus OX=10090 GN=Znf207 PE=1 SV=1	FALSE	TRUE	2.62626	1	3	1	1.68257e+07	8.76
High	Q9CY49	WD_REPEATS_REGION domain-containing protein OS=Mus musculus OX=10090 GN=Tbl2 PE=2 SV=1	FALSE	TRUE	5.65611	2	3	2	4.69324e+06	9.72
High	E9PWB2	Casein kinase I isoform alpha OS=Mus musculus OX=10090 GN=Csnk1a1 PE=1 SV=1	FALSE	TRUE	3.74332	1	2	1	22989569	5.85
High	Q8R2P8	Lysine--tRNA ligase OS=Mus musculus OX=10090 GN=Kars PE=1 SV=1	FALSE	TRUE	3.52564	2	2	2	7.98048e+06	5.39
High	Q9QUM9	Proteasome subunit alpha type-6 OS=Mus musculus OX=10090 GN=Psma6 PE=1 SV=1	FALSE	TRUE	9.34959	2	3	2	5.50386e+07	7.76
High	P35585	AP-1 complex subunit mu-1 OS=Mus musculus OX=10090 GN=Ap1m1 PE=1 SV=3	FALSE	TRUE	2.83688	1	2	1	1.4605e+07	5.28
High	Q8C845	EF-hand domain-containing protein D2 OS=Mus musculus OX=10090 GN=Efhd2 PE=1 SV=1	FALSE	TRUE	7.5	2	2	2	1.18105e+07	6.72
High	Q01149	Collagen alpha-2(I) chain OS=Mus musculus OX=10090 GN=Col1a2 PE=1 SV=2	FALSE	TRUE	3.27988	3	3	3	11794214	5.76
High	Q9CZW4	Long-chain-fatty-acid--CoA ligase 3 OS=Mus musculus OX=10090 GN=Acsl3 PE=1 SV=2	FALSE	TRUE	3.61111	2	2	1		4.82
High	C5H0E8	Rap1A-retro1 OS=Mus musculus OX=10090 GN=Gm9392 PE=2 SV=1	FALSE	TRUE	15.2174	3	3	3	3.32783e+07	5.71
High	Q9D2Q8	Protein S100-A14 OS=Mus musculus OX=10090 GN=S100a14 PE=1 SV=1	FALSE	TRUE	21.1538	2	2	2	1.81991e+07	3.26
High	P62245	40S ribosomal protein S15a OS=Mus musculus OX=10090 GN=Rps15a PE=1 SV=2	FALSE	TRUE	13.8462	2	8	2	3.03571e+08	18.99
High	Q04857	Collagen alpha-1(VI) chain OS=Mus musculus OX=10090 GN=Col6a1 PE=1 SV=1	FALSE	TRUE	1.95122	2	3	2	2.27145e+07	7.75
High	O55029	Coatomer subunit beta' OS=Mus musculus OX=10090 GN=Copb2 PE=1 SV=2	FALSE	TRUE	3.75691	3	3	3	1.58901e+07	8.06
High	Q9JKX6	ADP-sugar pyrophosphatase OS=Mus musculus OX=10090 GN=Nudt5 PE=1 SV=1	FALSE	TRUE	12.844	2	3	2	5865925	8.26
High	A0A494BB30	Protein phosphatase 1 regulatory subunit 14B OS=Mus musculus OX=10090 GN=Ppp1r14b PE=1 SV=1	FALSE	TRUE	13.3663	1	4	1	1.41158e+07	18.32
High	Q8K2T1	NmrA-like family domain-containing protein 1 OS=Mus musculus OX=10090 GN=Nmral1 PE=1 SV=1	FALSE	TRUE	8.09061	2	2	2	1.61676e+07	5.39
High	Q99JR1	Sideroflexin-1 OS=Mus musculus OX=10090 GN=Sfxn1 PE=1 SV=3	FALSE	TRUE	7.14286	2	3	2	1.01302e+07	7.65
High	Q3TG75	Uncharacterized protein OS=Mus musculus OX=10090 GN=Oat PE=1 SV=1	FALSE	TRUE	7.0615	2	3	2	1.17353e+07	6.64
High	A6H663	BCL2-associated athanogene 3 OS=Mus musculus OX=10090 GN=Bag3 PE=2 SV=1	FALSE	TRUE	7.45234	2	4	2	5.40887e+06	11.97
High	Q3TYK4	Uncharacterized protein OS=Mus musculus OX=10090 GN=Prkar1a PE=2 SV=1	FALSE	TRUE	6.66667	3	3	3	3.42916e+07	7.21
High	Q3TFD9	IF rod domain-containing protein OS=Mus musculus OX=10090 GN=Vim PE=2 SV=1	FALSE	TRUE	8.15451	3	4	3	8.46247e+06	9.27
High	P27046	Alpha-mannosidase 2 OS=Mus musculus OX=10090 GN=Man2a1 PE=1 SV=2	FALSE	TRUE	2.08696	2	2	2	5.26324e+06	6.58
High	Q05186	Reticulocalbin-1 OS=Mus musculus OX=10090 GN=Rcn1 PE=1 SV=1	FALSE	TRUE	6.76923	2	2	2	4.57442e+07	6.05
High	O88477	Insulin-like growth factor 2 mRNA-binding protein 1 OS=Mus musculus OX=10090 GN=Igf2bp1 PE=1 SV=1	FALSE	TRUE	5.54593	4	4	4	1.04079e+07	8.74
High	Q3U026	Uncharacterized protein OS=Mus musculus OX=10090 GN=Mogs PE=2 SV=1	FALSE	TRUE	2.63789	2	4	2	2.20581e+07	6.74
High	A0A1B0GR11	Transaldolase OS=Mus musculus OX=10090 GN=Taldo1 PE=1 SV=1	FALSE	TRUE	8.11518	3	3	3	1.51899e+07	7.15
High	Q3UWL8	Prefoldin subunit 4 OS=Mus musculus OX=10090 GN=Pfdn4 PE=1 SV=1	FALSE	TRUE	19.403	2	2	2	1.3076e+07	6.99
High	G3X8R0	Receptor expression-enhancing protein OS=Mus musculus OX=10090 GN=Reep5 PE=1 SV=1	FALSE	TRUE	15.3439	3	3	3	6.10801e+06	7.04
High	Q60710	Deoxynucleoside triphosphate triphosphohydrolase SAMHD1 OS=Mus musculus OX=10090 GN=Samhd1 PE=1 SV=3	FALSE	TRUE	4.86322	3	3	3	7.62283e+07	7.26
High	Q543F3	Calponin OS=Mus musculus OX=10090 GN=Cnn2 PE=1 SV=1	FALSE	TRUE	8.19672	2	2	1		6.15
High	Q61206	Platelet-activating factor acetylhydrolase IB subunit beta OS=Mus musculus OX=10090 GN=Pafah1b2 PE=1 SV=2	FALSE	TRUE	10.0437	1	2	1	2.67737e+07	7.52
High	Q9D051	Pyruvate dehydrogenase E1 component subunit beta, mitochondrial OS=Mus musculus OX=10090 GN=Pdhb PE=1 SV=1	FALSE	TRUE	4.45682	1	3	1	3.31692e+07	8.08
High	Q64429	Cytochrome P450 1B1 OS=Mus musculus OX=10090 GN=Cyp1b1 PE=1 SV=3	FALSE	TRUE	2.20994	1	2	1	2.74588e+07	5.16
High	Q6NXL1	Sec24-related gene family, member D (S. cerevisiae) OS=Mus musculus OX=10090 GN=Sec24d PE=1 SV=1	FALSE	TRUE	1.16279	1	2	1	2.16535e+07	5.84
High	E9PY39	Predicted gene 20431 OS=Mus musculus OX=10090 GN=Gm20431 PE=4 SV=1	FALSE	TRUE	9.7035	4	4	4	1.32309e+07	6.85
High	Q91ZE0	Trimethyllysine dioxygenase, mitochondrial OS=Mus musculus OX=10090 GN=Tmlhe PE=1 SV=2	FALSE	TRUE	5.46318	2	4	2	1.29786e+07	9.95
High	Q8VI75	Importin-4 OS=Mus musculus OX=10090 GN=Ipo4 PE=1 SV=1	FALSE	TRUE	2.40296	2	2	2		5.12
High	Q91V61	Sideroflexin-3 OS=Mus musculus OX=10090 GN=Sfxn3 PE=1 SV=1	FALSE	TRUE	13.7072	3	3	3	18028915	6.84
High	O70310	Glycylpeptide N-tetradecanoyltransferase 1 OS=Mus musculus OX=10090 GN=Nmt1 PE=1 SV=1	FALSE	TRUE	5.24194	2	3	1	2.41252e+07	5.65
High	P09211	Glutathione S-transferase P OS=Homo sapiens GN=GSTP1 PE=1 SV=2	TRUE	FALSE	10	2	3	1	5.84103e+07	7.84
High	Q8K2W5	Epoxide hydrolase OS=Mus musculus OX=10090 GN=Ephx1 PE=2 SV=1	FALSE	TRUE	9.89011	4	5	4	2.24755e+07	9.09
High	Q05D44	Eukaryotic translation initiation factor 5B OS=Mus musculus OX=10090 GN=Eif5b PE=1 SV=2	FALSE	TRUE	1.80921	2	2	2	1.11351e+07	5.97
High	P10639	Thioredoxin OS=Mus musculus OX=10090 GN=Txn PE=1 SV=3	FALSE	TRUE	20.9524	2	3	1	8.57085e+08	8.88
High	A1E5T5	Tctex-1 OS=Mus musculus OX=10090 PE=2 SV=1	FALSE	TRUE	14.1593	1	2	1	12478161	6.1
High	Q7TNE3	Sperm-associated antigen 7 OS=Mus musculus OX=10090 GN=Spag7 PE=1 SV=1	FALSE	TRUE	11.4537	2	2	2		5.63
High	Q3TVU9	Uncharacterized protein OS=Mus musculus OX=10090 GN=Dhrs1 PE=2 SV=1	FALSE	TRUE	11.5016	4	4	4	6.60899e+06	6.28
High	Q9WTX2	Interferon-inducible double-stranded RNA-dependent protein kinase activator A OS=Mus musculus OX=10090 GN=Prkra PE=1 SV=1	FALSE	TRUE	7.98722	2	3	2	1.85135e+07	8.1
High	Q9CZI5	Uncharacterized protein OS=Mus musculus OX=10090 GN=Rps23 PE=2 SV=1	FALSE	TRUE	21.3793	3	4	3	1.04927e+07	10.45
High	Q921V3	Nitrogen fixation gene 1 (S. cerevisiae) OS=Mus musculus OX=10090 GN=Nfs1 PE=2 SV=1	FALSE	TRUE	5.88235	2	2	2	3.1751e+06	5.91
High	Q9R1T4	Septin-6 OS=Mus musculus OX=10090 GN=Septin6 PE=1 SV=4	FALSE	TRUE	13.1336	4	4	1	2.91046e+06	9.71
High	P47738	Aldehyde dehydrogenase, mitochondrial OS=Mus musculus OX=10090 GN=Aldh2 PE=1 SV=1	FALSE	TRUE	10.79	5	5	5	1.30298e+07	10.31
High	A0A0B4J1E7	Importin subunit alpha-3 OS=Mus musculus OX=10090 GN=Kpna4 PE=1 SV=1	FALSE	TRUE	3.69181	2	2	1	7.07053e+06	5.28
High	B2M0S2	Secretory carrier-associated membrane protein OS=Mus musculus OX=10090 GN=Gm45927 PE=2 SV=1	FALSE	TRUE	2.08877	1	2	1	22633978	6.91
High	Q9R0E1	Multifunctional procollagen lysine hydroxylase and glycosyltransferase LH3 OS=Mus musculus OX=10090 GN=Plod3 PE=1 SV=1	FALSE	TRUE	4.45344	3	3	3	2.49576e+06	6.43
High	Q9D281	Protein Noxp20 OS=Mus musculus OX=10090 GN=Fam114a1 PE=1 SV=1	FALSE	TRUE	5.9754	2	2	2	2.82815e+07	6.52
High	Q3U621	Uncharacterized protein OS=Mus musculus OX=10090 GN=Rab10 PE=2 SV=1	FALSE	TRUE	17.5	2	4	1	10692406	12.64
High	O55126	Protein NipSnap homolog 2 OS=Mus musculus OX=10090 GN=Nipsnap2 PE=1 SV=1	FALSE	TRUE	6.76157	3	3	3	2.90372e+06	5.16
High	Q8C7K6	Prenylcysteine oxidase-like OS=Mus musculus OX=10090 GN=Pcyox1l PE=1 SV=1	FALSE	TRUE	5.45455	2	3	2	9.16083e+06	8.57
High	Q3UAP1	Uncharacterized protein OS=Mus musculus OX=10090 GN=Preb PE=1 SV=1	FALSE	TRUE	3.83693	1	2	1	11181807	6.47
High	E9QN92	Metalloreductase STEAP3 OS=Mus musculus OX=10090 GN=Steap3 PE=1 SV=1	FALSE	TRUE	4.75285	2	3	2	1.09508e+07	7.76
High	Q01405	Protein transport protein Sec23A OS=Mus musculus OX=10090 GN=Sec23a PE=1 SV=2	FALSE	TRUE	3.92157	2	2	2	6.53283e+06	5.38
High	Q9QZD9	Eukaryotic translation initiation factor 3 subunit I OS=Mus musculus OX=10090 GN=Eif3i PE=1 SV=1	FALSE	TRUE	15.3846	4	4	4	2.27755e+06	7.56
High	P50431	Serine hydroxymethyltransferase, cytosolic OS=Mus musculus OX=10090 GN=Shmt1 PE=1 SV=3	FALSE	TRUE	5.23013	2	2	1	2.46702e+06	5.12
High	Q8R127	Saccharopine dehydrogenase-like oxidoreductase OS=Mus musculus OX=10090 GN=Sccpdh PE=1 SV=1	FALSE	TRUE	5.59441	2	2	2	6.39854e+06	4.83
High	Q80UG5	Septin-9 OS=Mus musculus OX=10090 GN=Septin9 PE=1 SV=1	FALSE	TRUE	5.48885	3	3	3	2.94339e+07	6.85
High	O35459	Delta(3,5)-Delta(2,4)-dienoyl-CoA isomerase, mitochondrial OS=Mus musculus OX=10090 GN=Ech1 PE=1 SV=1	FALSE	TRUE	6.42202	1	2	1	1.0886e+07	8.2
High	P10518	Delta-aminolevulinic acid dehydratase OS=Mus musculus OX=10090 GN=Alad PE=1 SV=1	FALSE	TRUE	9.69697	2	2	2	1.72165e+07	5.33
High	Q921X9	Protein disulfide-isomerase A5 OS=Mus musculus OX=10090 GN=Pdia5 PE=1 SV=1	FALSE	TRUE	5.02901	2	2	2	1.0326e+07	4.5
High	P14115	60S ribosomal protein L27a OS=Mus musculus OX=10090 GN=Rpl27a PE=1 SV=5	FALSE	TRUE	21.6216	4	5	4	1.2016e+08	10.97
High	Q9CQU3	Protein RER1 OS=Mus musculus OX=10090 GN=Rer1 PE=1 SV=1	FALSE	TRUE	19.3878	2	2	2	1.17252e+07	6.79
High	P36552	Oxygen-dependent coproporphyrinogen-III oxidase, mitochondrial OS=Mus musculus OX=10090 GN=Cpox PE=1 SV=2	FALSE	TRUE	3.386	1	2	1	2.21436e+06	6.38
High	Q9QZL0	Receptor-interacting serine/threonine-protein kinase 3 OS=Mus musculus OX=10090 GN=Ripk3 PE=1 SV=2	FALSE	TRUE	6.3786	2	3	2	1.96217e+07	8.51
High	Q810A7	ATP-dependent RNA helicase DDX42 OS=Mus musculus OX=10090 GN=Ddx42 PE=1 SV=3	FALSE	TRUE	3.76749	2	2	2	4.08246e+06	6.35
High	G3X914	Cullin-5 OS=Mus musculus OX=10090 GN=Cul5 PE=1 SV=1	FALSE	TRUE	4.32749	3	3	3	2.54509e+06	8.11
High	Q3UA54	Uncharacterized protein (Fragment) OS=Mus musculus OX=10090 GN=Ptma PE=2 SV=1	FALSE	TRUE	8.13953	2	2	2	1.4969e+06	3.23
High	Q3UYQ4	Uncharacterized protein OS=Mus musculus OX=10090 GN=Api5 PE=2 SV=1	FALSE	TRUE	6.48855	3	3	3	2.08524e+07	7.31
High	Q548K2	Alcohol dehydrogenase class 4 OS=Mus musculus OX=10090 GN=Adh7 PE=2 SV=1	FALSE	TRUE	9.62567	3	3	3	2.79335e+07	5.05
High	P28867	Protein kinase C delta type OS=Mus musculus OX=10090 GN=Prkcd PE=1 SV=3	FALSE	TRUE	6.97329	3	3	3	1.00206e+07	4.73
High	Q80X95	Ras-related GTP-binding protein A OS=Mus musculus OX=10090 GN=Rraga PE=1 SV=1	FALSE	TRUE	7.02875	2	3	2	1.42256e+07	7.74
High	E9QLZ9	Protein enabled homolog OS=Mus musculus OX=10090 GN=Enah PE=1 SV=1	FALSE	TRUE	4.35323	3	3	3	2.26677e+06	7.52
High	Q8BVI4	Dihydropteridine reductase OS=Mus musculus OX=10090 GN=Qdpr PE=1 SV=2	FALSE	TRUE	9.95851	2	2	2	4.38207e+06	6.16
High	Q6P8X1	Sorting nexin-6 OS=Mus musculus OX=10090 GN=Snx6 PE=1 SV=2	FALSE	TRUE	6.65025	2	2	2	3.52962e+06	4.72
High	Q9WUM5	Succinate--CoA ligase [ADP/GDP-forming] subunit alpha, mitochondrial OS=Mus musculus OX=10090 GN=Suclg1 PE=1 SV=4	FALSE	TRUE	7.80347	2	2	2	3.85493e+07	5.54
High	P37804	Transgelin OS=Mus musculus OX=10090 GN=Tagln PE=1 SV=3	FALSE	TRUE	22.3881	4	5	4	1.45785e+07	11.34
High	Q571A2	MKIAA4106 protein (Fragment) OS=Mus musculus OX=10090 GN=Cul2 PE=2 SV=1	FALSE	TRUE	2.94118	3	3	3	4.31178e+06	6.45
High	O08579	Emerin OS=Mus musculus OX=10090 GN=Emd PE=1 SV=1	FALSE	TRUE	10.8108	2	3	2	5.45993e+06	8.73
High	Q99LS3	Phosphoserine phosphatase OS=Mus musculus OX=10090 GN=Psph PE=1 SV=1	FALSE	TRUE	17.3333	4	5	4	1.08773e+07	2.26
High	P45952	Medium-chain specific acyl-CoA dehydrogenase, mitochondrial OS=Mus musculus OX=10090 GN=Acadm PE=1 SV=1	FALSE	TRUE	5.46318	2	2	2	1.08356e+07	3.5
High	Q61033	Lamina-associated polypeptide 2, isoforms alpha/zeta OS=Mus musculus OX=10090 GN=Tmpo PE=1 SV=4	FALSE	TRUE	4.0404	2	2	2	21431972	5.83
High	Q8BLN5	Lanosterol synthase OS=Mus musculus OX=10090 GN=Lss PE=1 SV=2	FALSE	TRUE	2.31924	1	1	1	5.54484e+06	3.73
High	P47857	ATP-dependent 6-phosphofructokinase, muscle type OS=Mus musculus OX=10090 GN=Pfkm PE=1 SV=3	FALSE	TRUE	3.20513	2	3	2	7.83438e+06	7.3
High	Q684Q9	Ubiquitin-like protein GDX (Fragment) OS=Mus musculus OX=10090 PE=2 SV=1	FALSE	TRUE	17.4419	3	3	3		5.19
High	Q9Z0R9	Acyl-CoA 6-desaturase OS=Mus musculus OX=10090 GN=Fads2 PE=1 SV=1	FALSE	TRUE	3.37838	1	2	1	2.71163e+07	5.23
High	Q8CIN4	Serine/threonine-protein kinase PAK 2 OS=Mus musculus OX=10090 GN=Pak2 PE=1 SV=1	FALSE	TRUE	3.62595	2	2	2	18829211	6.1
High	Q99JY0	Trifunctional enzyme subunit beta, mitochondrial OS=Mus musculus OX=10090 GN=Hadhb PE=1 SV=1	FALSE	TRUE	7.78947	4	6	4	1.95873e+07	9.21
High	Q3TC45	EF-hand domain-containing protein OS=Mus musculus OX=10090 GN=S100a10 PE=1 SV=1	FALSE	TRUE	20.6186	2	3	2	2.93674e+07	7.09
High	P35821	Tyrosine-protein phosphatase non-receptor type 1 OS=Mus musculus OX=10090 GN=Ptpn1 PE=1 SV=2	FALSE	TRUE	6.48148	2	3	2	8.67908e+06	5.9
High	Q9Z2T6	Keratin, type II cuticular Hb5 OS=Mus musculus OX=10090 GN=Krt85 PE=1 SV=2	TRUE	TRUE	4.33925	2	3	1		8.46
High	Q3U399	Uncharacterized protein OS=Mus musculus OX=10090 GN=Slc35b2 PE=2 SV=1	FALSE	TRUE	5.56845	2	2	2	7.05744e+06	5.48
High	Q9R1T2	SUMO-activating enzyme subunit 1 OS=Mus musculus OX=10090 GN=Sae1 PE=1 SV=1	FALSE	TRUE	6.57143	2	4	2	2.80818e+06	6.55
High	Q9DC69	NADH dehydrogenase [ubiquinone] 1 alpha subcomplex subunit 9, mitochondrial OS=Mus musculus OX=10090 GN=Ndufa9 PE=1 SV=2	FALSE	TRUE	3.44828	1	2	1	1.64458e+07	5.14
High	Q3UL54	Uncharacterized protein OS=Mus musculus OX=10090 GN=Rsl1d1 PE=2 SV=1	FALSE	TRUE	7.74194	2	2	2	4.96136e+06	6.99
High	Q3TIQ3	Uncharacterized protein (Fragment) OS=Mus musculus OX=10090 GN=Pitpna PE=2 SV=1	FALSE	TRUE	8.57143	2	2	2	1.12141e+07	2.67
High	Q9Z0H4	CUGBP Elav-like family member 2 OS=Mus musculus OX=10090 GN=Celf2 PE=1 SV=1	FALSE	TRUE	6.10236	2	3	2	4.51905e+06	6.88
High	Q91VA7	Isocitrate dehydrogenase [NAD] subunit, mitochondrial OS=Mus musculus OX=10090 GN=Idh3b PE=1 SV=1	FALSE	TRUE	7.29167	3	3	3	13002309	6.75
High	Q9CRA4	Methylsterol monooxygenase 1 OS=Mus musculus OX=10090 GN=Msmo1 PE=1 SV=1	FALSE	TRUE	8.53242	2	2	2		4.76
High	Q14C24	U2 small nuclear ribonucleoprotein auxiliary factor (U2AF) 1 OS=Mus musculus OX=10090 GN=U2af1 PE=1 SV=1	FALSE	TRUE	9.62343	2	2	2	6.41383e+06	4.96
High	P51660	Peroxisomal multifunctional enzyme type 2 OS=Mus musculus OX=10090 GN=Hsd17b4 PE=1 SV=3	FALSE	TRUE	4.4898	3	3	3	1.00267e+07	7.66
High	P59999	Actin-related protein 2/3 complex subunit 4 OS=Mus musculus OX=10090 GN=Arpc4 PE=1 SV=3	FALSE	TRUE	17.8571	3	3	3	5.91195e+07	5.45
High	Q9EPL8	Importin-7 OS=Mus musculus OX=10090 GN=Ipo7 PE=1 SV=2	FALSE	TRUE	3.27553	3	3	3	25314220	7.52
High	Q9D6U8	Protein FAM162A OS=Mus musculus OX=10090 GN=Fam162a PE=1 SV=1	FALSE	TRUE	7.74194	2	4	2	3.01554e+07	8.1
High	Q3V244	RRM domain-containing protein OS=Mus musculus OX=10090 GN=Eif4h PE=2 SV=1	FALSE	TRUE	12.0968	3	3	3	1.72852e+07	6.01
High	P49718	DNA replication licensing factor MCM5 OS=Mus musculus OX=10090 GN=Mcm5 PE=1 SV=2	FALSE	TRUE	5.58583	3	3	3	1.44098e+07	7.18
High	Q9Z2L2	Truncated hsp25 (Fragment) OS=Mus musculus OX=10090 GN=Hspb1 PE=2 SV=1	FALSE	TRUE	19.5122	1	2	1	2.55838e+07	7.22
High	Q8VEH3	ADP-ribosylation factor-like protein 8A OS=Mus musculus OX=10090 GN=Arl8a PE=1 SV=1	FALSE	TRUE	9.67742	2	5	2	2.95e+07	11.21
High	Q07417	Short-chain specific acyl-CoA dehydrogenase, mitochondrial OS=Mus musculus OX=10090 GN=Acads PE=1 SV=2	FALSE	TRUE	6.31068	2	2	2	1.13789e+07	4.8
High	Q9D7B7	Probable glutathione peroxidase 8 OS=Mus musculus OX=10090 GN=Gpx8 PE=1 SV=1	FALSE	TRUE	11.0048	2	2	2	31458569	4.93
High	Q8CB16	Uncharacterized protein OS=Mus musculus OX=10090 GN=Palm PE=2 SV=1	FALSE	TRUE	7.3107	2	2	2	5.86075e+06	5.39
High	O08583	THO complex subunit 4 OS=Mus musculus OX=10090 GN=Alyref PE=1 SV=3	FALSE	TRUE	4.31373	1	2	1	3.27572e+07	4.91
High	Q9CR09	Ubiquitin-fold modifier-conjugating enzyme 1 OS=Mus musculus OX=10090 GN=Ufc1 PE=1 SV=1	FALSE	TRUE	11.3772	2	3	2	2.41267e+07	3.84
High	Q62425	Cytochrome c oxidase subunit NDUFA4 OS=Mus musculus OX=10090 GN=Ndufa4 PE=1 SV=2	FALSE	TRUE	26.8293	2	3	2	4.16159e+08	7.59
High	Q9JHU4	Cytoplasmic dynein 1 heavy chain 1 OS=Mus musculus OX=10090 GN=Dync1h1 PE=1 SV=2	FALSE	TRUE	0.839793	3	3	3	2.65902e+06	9.54
High	P62320	Small nuclear ribonucleoprotein Sm D3 OS=Mus musculus OX=10090 GN=Snrpd3 PE=1 SV=1	FALSE	TRUE	24.6032	2	2	2	2.24544e+07	6.63
High	P61967	AP-1 complex subunit sigma-1A OS=Mus musculus OX=10090 GN=Ap1s1 PE=1 SV=1	FALSE	TRUE	10.1266	1	2	1	6.78803e+06	6.84
High	ENSEMBL:ENSBTAP00000034412	(Bos taurus) similar to C4b-binding protein alpha chain [OS=Bos taurus]	TRUE	FALSE	11.5578	2	2	2		5.53
High	P51125	Calpastatin OS=Mus musculus OX=10090 GN=Cast PE=1 SV=2	FALSE	TRUE	3.04569	1	1	1		3.54
High	Q3UW40	TRASH domain-containing protein OS=Mus musculus OX=10090 GN=Rpl24 PE=2 SV=1	FALSE	TRUE	19.375	3	4	3	9.02367e+07	9.67
High	Q64524	Histone H2B type 2-E OS=Mus musculus OX=10090 GN=Hist2h2be PE=1 SV=3	FALSE	TRUE	23.8095	3	6	1	1.28163e+07	14.01
High	P61804	Dolichyl-diphosphooligosaccharide--protein glycosyltransferase subunit DAD1 OS=Mus musculus OX=10090 GN=Dad1 PE=1 SV=3	FALSE	TRUE	26.5487	3	3	3	2.77145e+06	6.61
High	Q9Z247	Peptidyl-prolyl cis-trans isomerase FKBP9 OS=Mus musculus OX=10090 GN=Fkbp9 PE=1 SV=1	FALSE	TRUE	6.49123	4	4	4	1.02244e+06	4.73
High	Q8BYK6	YTH domain-containing family protein 3 OS=Mus musculus OX=10090 GN=Ythdf3 PE=1 SV=2	FALSE	TRUE	2.73504	1	1	1	1.35322e+07	3.43
High	O08997	Copper transport protein ATOX1 OS=Mus musculus OX=10090 GN=Atox1 PE=1 SV=1	FALSE	TRUE	38.2353	2	3	2	1.55797e+07	5.79
High	Q8BMJ3	Eukaryotic translation initiation factor 1A, X-chromosomal OS=Mus musculus OX=10090 GN=Eif1ax PE=2 SV=3	FALSE	TRUE	21.5278	3	3	1	50589045	4.88
High	P62911	60S ribosomal protein L32 OS=Mus musculus OX=10090 GN=Rpl32 PE=1 SV=2	FALSE	TRUE	17.037	2	3	2	1.35257e+07	7.35
High	P97346	Nucleoredoxin OS=Mus musculus OX=10090 GN=Nxn PE=1 SV=1	FALSE	TRUE	3.90805	1	1	1		4.4
High	Q3U6B1	Uncharacterized protein (Fragment) OS=Mus musculus OX=10090 GN=G3bp2 PE=2 SV=1	FALSE	TRUE	11.0909	4	4	4	1.89061e+07	10.6
High	A0A494BB95	Eukaryotic translation initiation factor 1A OS=Mus musculus OX=10090 GN=Eif1a PE=1 SV=1	FALSE	TRUE	12.2047	3	3	1	4.66588e+07	4.98
High	Q9R0M6	Ras-related protein Rab-9A OS=Mus musculus OX=10090 GN=Rab9a PE=1 SV=1	FALSE	TRUE	6.96517	1	1	1	1.56561e+08	3.76
High	P70349	Histidine triad nucleotide-binding protein 1 OS=Mus musculus OX=10090 GN=Hint1 PE=1 SV=3	FALSE	TRUE	16.6667	2	3	2	3.59593e+08	6.68
High	Q63739	Protein tyrosine phosphatase type IVA 1 OS=Mus musculus OX=10090 GN=Ptp4a1 PE=1 SV=1	FALSE	TRUE	8.09249	1	1	1	1.83591e+07	3.13
High	Q922Y1	UBX domain-containing protein 1 OS=Mus musculus OX=10090 GN=Ubxn1 PE=1 SV=1	FALSE	TRUE	9.76431	1	1	1	1.45922e+07	2.88
High	Q544I8	IF rod domain-containing protein OS=Mus musculus OX=10090 GN=Krt23 PE=1 SV=1	TRUE	TRUE	4.2654	2	3	1	5.68852e+06	5.91
High	A0A0R4J0U2	Serine/threonine-protein phosphatase 4 regulatory subunit 2 OS=Mus musculus OX=10090 GN=Ppp4r2 PE=1 SV=1	FALSE	TRUE	5.7554	2	3	2	1.10746e+07	6.93
High	Q8BH97	Reticulocalbin-3 OS=Mus musculus OX=10090 GN=Rcn3 PE=1 SV=1	FALSE	TRUE	10.061	3	3	3	1.20929e+07	4.68
High	P63280	SUMO-conjugating enzyme UBC9 OS=Mus musculus OX=10090 GN=Ube2i PE=1 SV=1	TRUE	TRUE	16.4557	3	6	3	8.99166e+06	17.27
High	P02662	Alpha-S1-casein OS=Bos taurus GN=CSN1S1 PE=1 SV=2	TRUE	FALSE	10.2804	2	3	2	5.59907e+06	8.54
High	Q9EPU0	Regulator of nonsense transcripts 1 OS=Mus musculus OX=10090 GN=Upf1 PE=1 SV=2	FALSE	TRUE	2.75801	2	2	2	9.42301e+06	6.01
High	O70311	Glycylpeptide N-tetradecanoyltransferase 2 OS=Mus musculus OX=10090 GN=Nmt2 PE=1 SV=1	FALSE	TRUE	7.3724	3	3	2	4.43753e+06	5.75
High	P18572	Basigin OS=Mus musculus OX=10090 GN=Bsg PE=1 SV=2	FALSE	TRUE	3.3419	1	2	1	64150434	4.92
High	Q9CPT4	Myeloid-derived growth factor OS=Mus musculus OX=10090 GN=Mydgf PE=1 SV=1	FALSE	TRUE	16.2651	2	2	2	1.25966e+07	6.81
High	Q9DBH5	Vesicular integral-membrane protein VIP36 OS=Mus musculus OX=10090 GN=Lman2 PE=1 SV=2	FALSE	TRUE	8.10056	3	3	3	2.30407e+07	7.23
High	Q922H1	Protein arginine N-methyltransferase 3 OS=Mus musculus OX=10090 GN=Prmt3 PE=1 SV=2	FALSE	TRUE	6.20301	3	3	3	4.73556e+06	4.99
High	P55288	Cadherin-11 OS=Mus musculus OX=10090 GN=Cdh11 PE=1 SV=1	FALSE	TRUE	3.26633	2	2	2		5.58
High	Q8C0E3	E3 ubiquitin-protein ligase TRIM47 OS=Mus musculus OX=10090 GN=Trim47 PE=1 SV=2	FALSE	TRUE	2.34009	1	1	1		3.74
High	Q3U9P7	Succinyl-CoA:3-ketoacid-coenzyme A transferase OS=Mus musculus OX=10090 GN=Oxct1 PE=2 SV=1	FALSE	TRUE	5.96154	3	3	3		5.6
High	Q3TVP0	Uncharacterized protein OS=Mus musculus OX=10090 PE=2 SV=1	FALSE	TRUE	22.9167	3	4	1	5.39972e+06	3.94
High	Q3TIV5	Zinc finger CCCH domain-containing protein 15 OS=Mus musculus OX=10090 GN=Zc3h15 PE=1 SV=2	FALSE	TRUE	3.28638	1	2	1		5.45
High	H3BKH6	S-formylglutathione hydrolase OS=Mus musculus OX=10090 GN=Esd PE=1 SV=1	FALSE	TRUE	7.45763	2	2	2	1.75343e+07	4.53
High	A0A2I3BQ39	Ubiquitin carboxyl-terminal hydrolase (Fragment) OS=Mus musculus OX=10090 GN=Uchl3 PE=1 SV=1	FALSE	TRUE	5.28302	2	2	2	9.03946e+06	5.65
High	Q3TJG6	CS domain-containing protein OS=Mus musculus OX=10090 GN=Ptges3 PE=2 SV=1	FALSE	TRUE	13.125	2	2	2	1.79114e+07	4.65
High	Q3U3C2	ML domain-containing protein OS=Mus musculus OX=10090 GN=Npc2 PE=2 SV=1	FALSE	TRUE	18.7919	2	3	2	1.79371e+07	9.23
High	A0A1B0GS58	Glutaredoxin-3 OS=Mus musculus OX=10090 GN=Glrx3 PE=1 SV=1	FALSE	TRUE	7.48663	2	3	2	3.30452e+06	9.11
High	Q921G7	Electron transfer flavoprotein-ubiquinone oxidoreductase, mitochondrial OS=Mus musculus OX=10090 GN=Etfdh PE=1 SV=1	FALSE	TRUE	3.73377	2	2	2	1.84763e+07	5.91
High	Q6P069	Sorcin OS=Mus musculus OX=10090 GN=Sri PE=1 SV=1	FALSE	TRUE	9.09091	2	3	2	3.33083e+07	3.69
High	P70372	ELAV-like protein 1 OS=Mus musculus OX=10090 GN=Elavl1 PE=1 SV=2	FALSE	TRUE	13.1902	4	4	4	1.84028e+07	9.26
High	A0A0R4J0I9	Prolow-density lipoprotein receptor-related protein 1 OS=Mus musculus OX=10090 GN=Lrp1 PE=1 SV=1	FALSE	TRUE	0.528053	2	2	2	4.79455e+06	4.04
High	Q3ULK8	Uncharacterized protein OS=Mus musculus OX=10090 GN=Cnbp PE=1 SV=1	FALSE	TRUE	19.209	3	3	3	1.79557e+06	1.97
High	P37040	NADPH--cytochrome P450 reductase OS=Mus musculus OX=10090 GN=Por PE=1 SV=2	FALSE	TRUE	4.86726	3	3	3	14864427	6.61
High	Q3U944	L-type lectin-like domain-containing protein OS=Mus musculus OX=10090 GN=Lman1 PE=2 SV=1	FALSE	TRUE	5.85009	2	2	2	5.52084e+06	5.55
High	Q62351	Transferrin receptor protein 1 OS=Mus musculus OX=10090 GN=Tfrc PE=1 SV=1	FALSE	TRUE	4.58716	2	3	2	1.4644e+07	8.3
High	F7AA26	Paralemmin A kinase anchor protein (Fragment) OS=Mus musculus OX=10090 GN=Pakap PE=1 SV=1	FALSE	TRUE	2.37467	2	2	2		6.92
High	ENSEMBL:ENSBTAP00000014147	(Bos taurus) 12 kDa protein [OS=Bos taurus]	TRUE	FALSE	13.2743	1	2	1	1.89969e+08	5.74
High	O89112	Glutathione S-transferase LANCL1 OS=Mus musculus OX=10090 GN=Lancl1 PE=1 SV=1	FALSE	TRUE	9.27318	3	3	3	1.42548e+07	7.33
High	B7ZNM7	Sept5 protein OS=Mus musculus OX=10090 GN=Sept5 PE=1 SV=1	FALSE	TRUE	3.14961	1	2	1	6.71767e+06	4.92
High	Q9D6N1	Carbonic anhydrase 13 OS=Mus musculus OX=10090 GN=Ca13 PE=1 SV=1	FALSE	TRUE	8.77863	2	2	2	4.2107e+07	4.82
High	P97311	DNA replication licensing factor MCM6 OS=Mus musculus OX=10090 GN=Mcm6 PE=1 SV=1	FALSE	TRUE	6.09013	3	3	3	2.1991e+06	8.67
High	P10852	4F2 cell-surface antigen heavy chain OS=Mus musculus OX=10090 GN=Slc3a2 PE=1 SV=1	FALSE	TRUE	3.9924	2	2	2	1.79931e+07	4.53
High	P00761	Trypsin OS=Sus scrofa PE=1 SV=1	TRUE	FALSE	7.79221	2	42	2	2.57698e+10	54.28
High	Q543X6	Protein kinase domain-containing protein OS=Mus musculus OX=10090 GN=Map2k4 PE=1 SV=1	FALSE	TRUE	6.80101	2	2	2	4.30632e+06	5.49
High	Q03145	Ephrin type-A receptor 2 OS=Mus musculus OX=10090 GN=Epha2 PE=1 SV=3	FALSE	TRUE	3.48004	3	3	3	1.31118e+07	8.17
High	P00918	Carbonic anhydrase 2 OS=Homo sapiens GN=CA2 PE=1 SV=2	TRUE	FALSE	8.46154	2	2	2	29135277	5.25
High	O55135	Eukaryotic translation initiation factor 6 OS=Mus musculus OX=10090 GN=Eif6 PE=1 SV=2	FALSE	TRUE	9.79592	2	2	2	1.28234e+07	4.53
High	Q5SUR0	Phosphoribosylformylglycinamidine synthase OS=Mus musculus OX=10090 GN=Pfas PE=1 SV=1	FALSE	TRUE	1.72027	2	2	2	7.49955e+06	5.11
High	P63037	DnaJ homolog subfamily A member 1 OS=Mus musculus OX=10090 GN=Dnaja1 PE=1 SV=1	FALSE	TRUE	6.54912	2	2	2	2.20258e+07	3.92
High	Q78P92	FSHD Region Gene 1 protein OS=Mus musculus OX=10090 GN=Frg1 PE=1 SV=1	FALSE	TRUE	10.4651	2	2	2	5.7711e+06	5.01
High	P47713	Cytosolic phospholipase A2 OS=Mus musculus OX=10090 GN=Pla2g4a PE=1 SV=1	FALSE	TRUE	5.61497	3	3	3	1.70459e+06	7.36
High	Q52L97	Importin subunit alpha OS=Mus musculus OX=10090 GN=Kpna2 PE=1 SV=1	FALSE	TRUE	6.42722	3	3	3	4.08253e+06	7.58
High	Q9CRC0	Vitamin K epoxide reductase complex subunit 1 OS=Mus musculus OX=10090 GN=Vkorc1 PE=1 SV=1	FALSE	TRUE	8.07453	1	1	1	3.14869e+07	3.54
High	H7BX38	Stromal cell-derived factor 1 OS=Mus musculus OX=10090 GN=Cxcl12 PE=1 SV=1	FALSE	TRUE	11.7647	1	1	1		3.21
High	P97807	Fumarate hydratase, mitochondrial OS=Mus musculus OX=10090 GN=Fh PE=1 SV=3	FALSE	TRUE	6.31164	2	2	2	8.18895e+06	4.93
High	Q8BYA0	Tubulin-specific chaperone D OS=Mus musculus OX=10090 GN=Tbcd PE=1 SV=1	FALSE	TRUE	2.7592	3	3	3	4.67176e+06	7.79
High	Q922Q8	Leucine-rich repeat-containing protein 59 OS=Mus musculus OX=10090 GN=Lrrc59 PE=1 SV=1	FALSE	TRUE	6.18893	2	2	2	8.41182e+06	3.91
High	O08528	Hexokinase-2 OS=Mus musculus OX=10090 GN=Hk2 PE=1 SV=1	FALSE	TRUE	2.39913	2	2	2	6.47808e+06	5.33
High	Q8VBZ3	Cleft lip and palate transmembrane protein 1 homolog OS=Mus musculus OX=10090 GN=Clptm1 PE=1 SV=1	FALSE	TRUE	6.77711	2	3	2	2.57694e+06	9.14
High	B1AQZ0	Septin 8 OS=Mus musculus OX=10090 GN=Sept8 PE=1 SV=1	FALSE	TRUE	4.95868	2	2	1	3.32968e+06	2.61
High	Q8BWZ3	N-alpha-acetyltransferase 25, NatB auxiliary subunit OS=Mus musculus OX=10090 GN=Naa25 PE=1 SV=1	FALSE	TRUE	2.46914	2	2	2	1.74724e+06	4.65
High	P22437	Prostaglandin G/H synthase 1 OS=Mus musculus OX=10090 GN=Ptgs1 PE=1 SV=1	FALSE	TRUE	2.32558	1	1	1	2.82155e+07	2.88
High	B1AZ39	Chromatin modifying protein 6 OS=Mus musculus OX=10090 GN=Chmp6 PE=1 SV=1	FALSE	TRUE	6.5	1	1	1		3.2
High	Q69ZW4	MKIAA0899 protein (Fragment) OS=Mus musculus OX=10090 GN=Ap2a2 PE=2 SV=1	FALSE	TRUE	2.68873	3	3	1	7.3178e+06	4.78
High	E9QP00	Transformer-2 protein homolog alpha OS=Mus musculus OX=10090 GN=Tra2a PE=1 SV=1	FALSE	TRUE	8.86525	2	2	2	4.81902e+06	2.75
High	Q8BL97	Serine/arginine-rich splicing factor 7 OS=Mus musculus OX=10090 GN=Srsf7 PE=1 SV=1	FALSE	TRUE	9.73783	2	2	1	3.74361e+06	4.99
High	Q9QXX4	Calcium-binding mitochondrial carrier protein Aralar2 OS=Mus musculus OX=10090 GN=Slc25a13 PE=1 SV=1	FALSE	TRUE	3.99408	2	2	1		5.54
High	Q922W5	Pyrroline-5-carboxylate reductase 1, mitochondrial OS=Mus musculus OX=10090 GN=Pycr1 PE=1 SV=1	FALSE	TRUE	7.44337	2	2	1	4.20319e+06	2.45
High	Q9D0T1	NHP2-like protein 1 OS=Mus musculus OX=10090 GN=Snu13 PE=1 SV=4	FALSE	TRUE	17.9688	2	2	2	6.68793e+07	5.1
High	Q9DC13	Uncharacterized protein OS=Mus musculus OX=10090 GN=Lamp1 PE=2 SV=1	FALSE	TRUE	2.9484	1	2	1	1.23184e+07	5.39
High	Q3V3R1	Monofunctional C1-tetrahydrofolate synthase, mitochondrial OS=Mus musculus OX=10090 GN=Mthfd1l PE=1 SV=2	FALSE	TRUE	3.68475	3	3	3	19297345	6.37
High	Q3UHW5	Uncharacterized protein OS=Mus musculus OX=10090 GN=Rab8a PE=2 SV=1	FALSE	TRUE	9.13462	2	4	1	2.55562e+07	10.66
High	Q14BZ3	Latexin OS=Mus musculus OX=10090 GN=Lxn PE=1 SV=1	FALSE	TRUE	10.8108	2	3	2	57891623	6.87
High	Q9QUJ7	Long-chain-fatty-acid--CoA ligase 4 OS=Mus musculus OX=10090 GN=Acsl4 PE=1 SV=2	FALSE	TRUE	2.95359	2	2	1	1.43242e+07	4.77
High	V9GX38	Predicted gene 17190 OS=Mus musculus OX=10090 GN=Gm17190 PE=1 SV=1	FALSE	TRUE	8.12325	2	2	1		6.57
High	Q9EPJ9	ADP-ribosylation factor GTPase-activating protein 1 OS=Mus musculus OX=10090 GN=Arfgap1 PE=1 SV=2	FALSE	TRUE	4.58937	1	1	1	9.21328e+06	4.11
High	Q9CPQ1	Cytochrome c oxidase subunit 6C OS=Mus musculus OX=10090 GN=Cox6c PE=1 SV=3	FALSE	TRUE	17.1053	1	2	1	45537342	5.32
High	Q3TFQ8	Alpha-1,4 glucan phosphorylase OS=Mus musculus OX=10090 GN=Pygb PE=2 SV=1	FALSE	TRUE	3.32147	2	2	2	1.25167e+07	5.35
High	P70290	55 kDa erythrocyte membrane protein OS=Mus musculus OX=10090 GN=Mpp1 PE=1 SV=1	FALSE	TRUE	4.29185	1	1	1	1.58868e+07	2.67
High	A0A140LIT2	7-dehydrocholesterol reductase OS=Mus musculus OX=10090 GN=Dhcr7 PE=1 SV=1	FALSE	TRUE	4.43038	2	2	2	4.98825e+06	4.4
High	Q9CQ75	NADH dehydrogenase [ubiquinone] 1 alpha subcomplex subunit 2 OS=Mus musculus OX=10090 GN=Ndufa2 PE=1 SV=3	FALSE	TRUE	14.1414	1	1	1	6.09645e+06	3.37
High	Q8VCG1	Deoxyuridine triphosphatase OS=Mus musculus OX=10090 GN=Dut PE=1 SV=1	FALSE	TRUE	11	2	2	2	8003864	3.59
High	Q3TSZ4	Aldose 1-epimerase OS=Mus musculus OX=10090 GN=Galm PE=2 SV=1	FALSE	TRUE	8.18713	2	2	2		5.19
High	A0A087WNU6	Leucine-rich repeat flightless-interacting protein 1 (Fragment) OS=Mus musculus OX=10090 GN=Lrrfip1 PE=1 SV=1	FALSE	TRUE	2.26087	1	1	1	8.25896e+06	3.49
High	O54946	DnaJ homolog subfamily B member 6 OS=Mus musculus OX=10090 GN=Dnajb6 PE=1 SV=4	FALSE	TRUE	3.56164	1	1	1	2.85135e+06	3.55
High	P10605	Cathepsin B OS=Mus musculus OX=10090 GN=Ctsb PE=1 SV=2	FALSE	TRUE	6.19469	2	3	2	25818838	6.19
High	Q497N1	40S ribosomal protein S26 OS=Mus musculus OX=10090 GN=Rps26 PE=1 SV=1	FALSE	TRUE	42.6087	4	4	4	1.76758e+07	9.1
High	P59108	Copine-2 OS=Mus musculus OX=10090 GN=Cpne2 PE=1 SV=1	FALSE	TRUE	4.0146	2	2	2	1.11911e+07	5.46
High	O88952	Protein lin-7 homolog C OS=Mus musculus OX=10090 GN=Lin7c PE=1 SV=2	FALSE	TRUE	10.6599	2	2	2	4.61167e+06	4.95
High	Q60692	Proteasome subunit beta type-6 OS=Mus musculus OX=10090 GN=Psmb6 PE=1 SV=3	FALSE	TRUE	9.2437	2	2	2	1.86158e+07	2.51
High	Q9CQA6	Coiled-coil-helix-coiled-coil-helix domain-containing protein 1 OS=Mus musculus OX=10090 GN=Chchd1 PE=1 SV=1	FALSE	TRUE	13.5593	1	1	1	9.34227e+06	2.46
High	Q8BVQ9	26S proteasome regulatory subunit 7 OS=Mus musculus OX=10090 GN=Psmc2 PE=1 SV=1	FALSE	TRUE	2.73684	1	1	1	1.5215e+07	3.08
High	Q8C6A3	Uncharacterized protein OS=Mus musculus OX=10090 GN=Prep PE=2 SV=1	FALSE	TRUE	4.65116	3	3	3	1.59666e+07	8.03
High	Q99JF8	PC4 and SFRS1-interacting protein OS=Mus musculus OX=10090 GN=Psip1 PE=1 SV=1	FALSE	TRUE	3.59848	1	1	1	4.08143e+06	3.83
High	P10599	Thioredoxin OS=Homo sapiens GN=TXN PE=1 SV=3	TRUE	FALSE	20.9524	2	3	1	406341864	8.23
High	Q9D6Z1	Nucleolar protein 56 OS=Mus musculus OX=10090 GN=Nop56 PE=1 SV=2	FALSE	TRUE	2.24138	1	2	1	1.10696e+07	4.81
High	Q3THP1	Dipeptidyl peptidase 3 OS=Mus musculus OX=10090 GN=Dpp3 PE=2 SV=1	FALSE	TRUE	2.57453	2	2	2	4.2637e+06	4.43
High	Q924Z4	Ceramide synthase 2 OS=Mus musculus OX=10090 GN=Cers2 PE=1 SV=1	FALSE	TRUE	4.21053	1	1	1	2.11021e+07	2.92
High	Q6ZQ58	La-related protein 1 OS=Mus musculus OX=10090 GN=Larp1 PE=1 SV=3	FALSE	TRUE	2.23881	2	2	2		4.98
High	Q8BIF0	CD99 antigen-like protein 2 OS=Mus musculus OX=10090 GN=Cd99l2 PE=1 SV=1	FALSE	TRUE	7.59494	1	1	1	2.57237e+06	3.03
High	P23116	Eukaryotic translation initiation factor 3 subunit A OS=Mus musculus OX=10090 GN=Eif3a PE=1 SV=5	FALSE	TRUE	1.5625	2	2	2		4.7
High	Q3TL79	Aha1_N domain-containing protein OS=Mus musculus OX=10090 GN=Ahsa1 PE=2 SV=1	FALSE	TRUE	9.1716	3	3	2	747082	6.01
High	Q58DZ3	Ribosomal protein L30 OS=Mus musculus OX=10090 GN=Rpl30 PE=1 SV=1	FALSE	TRUE	40.8696	3	3	3	1.34679e+07	7.37
High	Q9Z1A1	TFG protein OS=Mus musculus OX=10090 GN=Tfg PE=1 SV=1	FALSE	TRUE	6.29723	2	2	2	1.52915e+07	3.42
High	O70499	Small nuclear ribonucleoprotein-associated protein OS=Mus musculus OX=10090 GN=Snrpn PE=3 SV=1	FALSE	TRUE	6.25	1	1	1		3.04
High	A2RTC8	Membrane-associated ring finger (C3HC4) 5 OS=Mus musculus OX=10090 GN=March5 PE=1 SV=1	FALSE	TRUE	5.7554	1	1	1		3.17
High	O89086	RNA-binding protein 3 OS=Mus musculus OX=10090 GN=Rbm3 PE=1 SV=1	FALSE	TRUE	16.3399	2	2	2	2.20664e+06	3.27
High	Q9QZM0	Ubiquilin-2 OS=Mus musculus OX=10090 GN=Ubqln2 PE=1 SV=2	FALSE	TRUE	2.66458	1	1	1		4.02
High	Q9JKR6	Hypoxia up-regulated protein 1 OS=Mus musculus OX=10090 GN=Hyou1 PE=1 SV=1	FALSE	TRUE	2.3023	2	2	2	1.10226e+07	4.81
High	E9QJW0	Microsomal glutathione S-transferase 1 OS=Mus musculus OX=10090 GN=Mgst1 PE=1 SV=1	FALSE	TRUE	5.67686	1	1	1	141262300	3.18
High	Q9CVF5	Flavodoxin_2 domain-containing protein (Fragment) OS=Mus musculus OX=10090 GN=Nqo2 PE=2 SV=1	FALSE	TRUE	7.49064	2	2	2	1.99295e+06	4.69
High	A2NN81	B9-scFv OS=Mus musculus OX=10090 GN=Igh-V7183 PE=1 SV=1	FALSE	TRUE	4.83271	1	1	1	5.46505e+06	3.27
High	E9QLZ1	TSC22 domain family protein 1 OS=Mus musculus OX=10090 GN=Tsc22d1 PE=1 SV=1	FALSE	TRUE	1.76416	2	2	2	1.70962e+07	5.11
High	Q8BGS2	BolA-like protein 2 OS=Mus musculus OX=10090 GN=Bola2 PE=1 SV=1	FALSE	TRUE	30.2326	2	2	2		4.37
High	D6Q0F5	Cytoplasmic dynein intermediate chain 2 isoform 2.1 OS=Mus musculus OX=10090 GN=Dync1i2 PE=2 SV=1	FALSE	TRUE	2.1374	1	1	1	2.44179e+06	2.97
High	Q7TQD7	Myo1b protein OS=Mus musculus OX=10090 GN=Myo1b PE=1 SV=1	FALSE	TRUE	1.67254	2	2	2	1.95727e+07	4.61
High	Q791T5	Mitochondrial carrier homolog 1 OS=Mus musculus OX=10090 GN=Mtch1 PE=1 SV=1	FALSE	TRUE	2.82776	1	2	1	5.031e+06	4.86
High	Q64669	NAD(P)H dehydrogenase [quinone] 1 OS=Mus musculus OX=10090 GN=Nqo1 PE=1 SV=3	FALSE	TRUE	8.39416	2	2	2	5.41564e+06	4.12
High	A2AH25	Rho GTPase-activating protein 1 OS=Mus musculus OX=10090 GN=Arhgap1 PE=1 SV=1	FALSE	TRUE	6.26305	3	3	3	2.01474e+07	4.48
High	A0A087WQS2	Basic leucine zipper and W2 domain-containing protein 1 OS=Mus musculus OX=10090 GN=Bzw1 PE=1 SV=1	FALSE	TRUE	6.65188	3	3	3	3.01678e+07	6.44
High	P52760	2-iminobutanoate/2-iminopropanoate deaminase OS=Mus musculus OX=10090 GN=Rida PE=1 SV=3	FALSE	TRUE	26.6667	3	4	3	1.43494e+07	10.63
High	Q3TMX5	Mesencephalic astrocyte-derived neurotrophic factor OS=Mus musculus OX=10090 GN=Manf PE=1 SV=1	FALSE	TRUE	17.3184	2	3	2	1.98602e+07	8.3
High	Q8R1G6	PDZ and LIM domain protein 2 OS=Mus musculus OX=10090 GN=Pdlim2 PE=1 SV=1	FALSE	TRUE	7.44986	2	3	2	2.5245e+07	7.88
High	Q8K0C4	Lanosterol 14-alpha demethylase OS=Mus musculus OX=10090 GN=Cyp51a1 PE=1 SV=1	FALSE	TRUE	2.38569	1	1	1	16649284	3.16
High	Q69ZP5	MKIAA1181 protein (Fragment) OS=Mus musculus OX=10090 GN=Ergic1 PE=2 SV=1	FALSE	TRUE	11.25	2	3	2	1.17871e+07	6.56
High	O35685	Nuclear migration protein nudC OS=Mus musculus OX=10090 GN=Nudc PE=1 SV=1	FALSE	TRUE	9.63855	3	3	3	1.27354e+07	6.16
High	P62077	Mitochondrial import inner membrane translocase subunit Tim8 B OS=Mus musculus OX=10090 GN=Timm8b PE=1 SV=1	FALSE	TRUE	16.8675	1	1	1	1.03396e+07	3.17
High	Q3U6C7	Succinate-CoA ligase subunit beta (Fragment) OS=Mus musculus OX=10090 GN=Sucla2 PE=2 SV=1	FALSE	TRUE	4.68085	2	2	2	2.74425e+06	4.87
High	Q7TSV2	Sodium/hydrogen exchanger OS=Mus musculus OX=10090 GN=Slc9a1 PE=2 SV=1	FALSE	TRUE	1.33657	1	2	1	1.66714e+07	4.96
High	Q9DCS3	Enoyl-[acyl-carrier-protein] reductase, mitochondrial OS=Mus musculus OX=10090 GN=Mecr PE=1 SV=2	FALSE	TRUE	4.02145	1	2	1		4.26
High	P11031	Activated RNA polymerase II transcriptional coactivator p15 OS=Mus musculus OX=10090 GN=Sub1 PE=1 SV=3	FALSE	TRUE	15.748	2	2	2		5.13
High	Q3U0T9	Rab35 OS=Mus musculus OX=10090 GN=Rab35 PE=1 SV=1	FALSE	TRUE	9.95025	2	4	1		8.82
High	A0A087WSK7	Predicted gene 28778 (Fragment) OS=Mus musculus OX=10090 GN=Gm28778 PE=4 SV=1	FALSE	TRUE	6.43777	1	1	1	7.32454e+06	3.39
High	Q8R1X6	Spartin OS=Mus musculus OX=10090 GN=Spart PE=1 SV=1	FALSE	TRUE	2.3845	1	1	1	9.22089e+06	2.23
High	Q9CQW1	Synaptobrevin homolog YKT6 OS=Mus musculus OX=10090 GN=Ykt6 PE=1 SV=1	FALSE	TRUE	13.1313	2	2	2	540485	5.58
High	Q3U281	Uncharacterized protein OS=Mus musculus OX=10090 GN=Sar1b PE=2 SV=1	FALSE	TRUE	9.59596	2	2	2	30742345	2.09
High	Q571B0	Transmembrane 9 superfamily member (Fragment) OS=Mus musculus OX=10090 GN=Tm9sf3 PE=2 SV=1	FALSE	TRUE	3.02067	2	2	2	1.34316e+07	4.67
High	P55096	ATP-binding cassette sub-family D member 3 OS=Mus musculus OX=10090 GN=Abcd3 PE=1 SV=2	FALSE	TRUE	2.12443	1	1	1	8.29471e+06	2.68
High	F8WHU5	Sister chromatid cohesion protein PDS5 homolog B OS=Mus musculus OX=10090 GN=Pds5b PE=1 SV=1	FALSE	TRUE	1.79434	2	2	2	5.39495e+06	2.7
High	Q3TIX6	Far upstream element (FUSE)-binding protein 3 OS=Mus musculus OX=10090 GN=Fubp3 PE=1 SV=1	FALSE	TRUE	6.08696	3	3	3	2.1485e+07	2.39
High	P53690	Matrix metalloproteinase-14 OS=Mus musculus OX=10090 GN=Mmp14 PE=2 SV=3	FALSE	TRUE	3.95189	2	2	2	2.22541e+07	5.3
High	Q9QXB9	Developmentally-regulated GTP-binding protein 2 OS=Mus musculus OX=10090 GN=Drg2 PE=1 SV=1	FALSE	TRUE	5.76923	2	2	2	8.07058e+06	4.73
High	Q9CPU4	Microsomal glutathione S-transferase 3 OS=Mus musculus OX=10090 GN=Mgst3 PE=1 SV=1	FALSE	TRUE	9.15033	1	1	1	4.42854e+06	3.03
High	G3X956	SPT16, facilitates chromatin-remodeling subunit OS=Mus musculus OX=10090 GN=Supt16 PE=1 SV=1	FALSE	TRUE	2.19675	2	2	2	1.94823e+06	4.89
High	Q3TFU8	GOLD domain-containing protein OS=Mus musculus OX=10090 GN=Tmed9 PE=2 SV=1	FALSE	TRUE	4.08922	1	2	1	55610786	7.25
High	P17426	AP-2 complex subunit alpha-1 OS=Mus musculus OX=10090 GN=Ap2a1 PE=1 SV=1	FALSE	TRUE	3.07062	3	3	1		4.4
High	Q544G5	Uncharacterized protein OS=Mus musculus OX=10090 GN=Dag1 PE=1 SV=1	FALSE	TRUE	1.79171	1	2	1	2.08575e+07	6.3
High	Q0PD14	Rab39B OS=Mus musculus OX=10090 GN=Rab39b PE=1 SV=1	FALSE	TRUE	8.92019	2	4	1	942855	10.58
High	Q3U9N8	Inosine-5'-monophosphate dehydrogenase OS=Mus musculus OX=10090 GN=Impdh2 PE=2 SV=1	FALSE	TRUE	6.22568	2	2	2	5.70402e+06	5.67
High	A0A0R4IZY0	Thimet oligopeptidase OS=Mus musculus OX=10090 GN=Thop1 PE=1 SV=1	FALSE	TRUE	2.76565	1	1	1	1.27098e+07	4.36
High	Q63844	Mitogen-activated protein kinase 3 OS=Mus musculus OX=10090 GN=Mapk3 PE=1 SV=5	FALSE	TRUE	5.52632	2	2	1		4.22
High	P24668	Cation-dependent mannose-6-phosphate receptor OS=Mus musculus OX=10090 GN=M6pr PE=1 SV=1	FALSE	TRUE	5.03597	1	2	1	23753965	5.53
High	Q99LX0	Protein/nucleic acid deglycase DJ-1 OS=Mus musculus OX=10090 GN=Park7 PE=1 SV=1	FALSE	TRUE	8.46561	1	1	1	7.83698e+06	3.67
High	Q91YE6	Importin-9 OS=Mus musculus OX=10090 GN=Ipo9 PE=1 SV=3	FALSE	TRUE	4.22671	3	3	3	3.22663e+07	6.92
High	Q8K1J6	CCA tRNA nucleotidyltransferase 1, mitochondrial OS=Mus musculus OX=10090 GN=Trnt1 PE=1 SV=1	FALSE	TRUE	2.76498	1	2	1		5.03
High	Q80X71	Transmembrane protein 106B OS=Mus musculus OX=10090 GN=Tmem106b PE=1 SV=1	FALSE	TRUE	6.54545	2	2	2	1.10877e+06	0
High	Q91YT0	NADH dehydrogenase [ubiquinone] flavoprotein 1, mitochondrial OS=Mus musculus OX=10090 GN=Ndufv1 PE=1 SV=1	FALSE	TRUE	3.23276	1	1	1		2.29
High	Q5SUF2	Luc7-like protein 3 OS=Mus musculus OX=10090 GN=Luc7l3 PE=1 SV=1	FALSE	TRUE	3.24074	1	2	1	9.54909e+06	5.28
High	Q9ES97	Reticulon-3 OS=Mus musculus OX=10090 GN=Rtn3 PE=1 SV=2	FALSE	TRUE	1.14108	1	2	1	6.08766e+07	5.2
High	Q6P5F9	Exportin-1 OS=Mus musculus OX=10090 GN=Xpo1 PE=1 SV=1	FALSE	TRUE	3.64146	4	5	4	4.13533e+07	2.83
High	B2RSV4	Splicing factor 3b, subunit 3 OS=Mus musculus OX=10090 GN=Sf3b3 PE=2 SV=1	FALSE	TRUE	2.87592	3	3	3	6058654	7.08
High	Q5SVP3	PA28 beta subunit OS=Mus musculus OX=10090 GN=PSME2b PE=1 SV=1	FALSE	TRUE	8.78661	2	3	2	2.13543e+07	5.49
High	Q52L67	Gpsn2 protein OS=Mus musculus OX=10090 GN=Tecr PE=1 SV=1	FALSE	TRUE	6.35359	2	2	2	21776667	2.63
High	Q3TRK9	MFS domain-containing protein OS=Mus musculus OX=10090 GN=Slc16a1 PE=2 SV=1	FALSE	TRUE	4.46247	2	2	2	1.66283e+07	4.79
High	P14685	26S proteasome non-ATPase regulatory subunit 3 OS=Mus musculus OX=10090 GN=Psmd3 PE=1 SV=3	FALSE	TRUE	3.77358	2	2	2	7.83317e+06	4.9
High	Q59J78	NADH dehydrogenase [ubiquinone] 1 alpha subcomplex assembly factor 2 OS=Mus musculus OX=10090 GN=Ndufaf2 PE=1 SV=1	FALSE	TRUE	14.2857	2	2	2		4.44
High	Q7TNV0	Protein DEK OS=Mus musculus OX=10090 GN=Dek PE=1 SV=1	FALSE	TRUE	6.84211	2	2	2	8.2104e+06	6.08
High	Q6R0H7	Guanine nucleotide-binding protein G(s) subunit alpha isoforms XLas OS=Mus musculus OX=10090 GN=Gnas PE=1 SV=1	FALSE	TRUE	1.76523	2	3	1	3.09056e+06	6
High	P30412	Peptidyl-prolyl cis-trans isomerase C OS=Mus musculus OX=10090 GN=Ppic PE=1 SV=1	FALSE	TRUE	6.13208	1	1	1	9.19678e+06	2.57
High	Q3TDN2	FAS-associated factor 2 OS=Mus musculus OX=10090 GN=Faf2 PE=1 SV=2	FALSE	TRUE	3.59551	1	1	1		2.7
High	P31266	Recombining binding protein suppressor of hairless OS=Mus musculus OX=10090 GN=Rbpj PE=1 SV=1	FALSE	TRUE	2.09125	1	1	1		3.02
High	Q9D7N9	Adipocyte plasma membrane-associated protein OS=Mus musculus OX=10090 GN=Apmap PE=1 SV=1	FALSE	TRUE	7.22892	2	3	2	6.75553e+06	7.66
High	H7BX95	Serine/arginine-rich-splicing factor 1 OS=Mus musculus OX=10090 GN=Srsf1 PE=1 SV=1	FALSE	TRUE	11.4625	3	3	3	2.61221e+07	4.55
High	P67778	Prohibitin OS=Mus musculus OX=10090 GN=Phb PE=1 SV=1	FALSE	TRUE	4.41176	1	1	1	1.05746e+07	2.53
High	Q9JJ78	Lymphokine-activated killer T-cell-originated protein kinase OS=Mus musculus OX=10090 GN=Pbk PE=1 SV=1	FALSE	TRUE	6.06061	2	2	2	7.4556e+06	4.69
High	A2RT57	Spastic paraplegia 21 homolog (Human) OS=Mus musculus OX=10090 GN=Spg21 PE=2 SV=1	FALSE	TRUE	4.54545	1	1	1		2.27
High	Q9JMH6	Thioredoxin reductase 1, cytoplasmic OS=Mus musculus OX=10090 GN=Txnrd1 PE=1 SV=3	FALSE	TRUE	5.87276	3	3	3	1.6503e+06	6.84
High	Q3TL58	Uncharacterized protein OS=Mus musculus OX=10090 GN=Skp1a PE=2 SV=1	FALSE	TRUE	7.36196	1	1	1	2.70397e+07	2.93
High	P62071	Ras-related protein R-Ras2 OS=Mus musculus OX=10090 GN=Rras2 PE=1 SV=1	FALSE	TRUE	11.2745	2	2	2	1.70769e+06	3.93
High	G5E895	Aldo-keto reductase family 1, member B10 (aldose reductase) OS=Mus musculus OX=10090 GN=Akr1b10 PE=1 SV=1	FALSE	TRUE	7.27848	3	4	3	1.91368e+07	3.78
High	Q80TT4	MKIAA0719 protein (Fragment) OS=Mus musculus OX=10090 GN=Tomm70a PE=2 SV=1	FALSE	TRUE	6.86901	4	4	4	1.81398e+06	4.59
High	P63013	Paired mesoderm homeobox protein 1 OS=Mus musculus OX=10090 GN=Prrx1 PE=1 SV=1	FALSE	TRUE	5.30612	1	1	1	8.08013e+06	2.68
High	Q545R9	Cyclin-dependent kinases regulatory subunit OS=Mus musculus OX=10090 GN=Cks2 PE=1 SV=1	FALSE	TRUE	11.3924	1	2	1	14807688	2.11
High	Q5NCJ9	Uncharacterized protein OS=Mus musculus OX=10090 GN=Uqcr10 PE=1 SV=1	FALSE	TRUE	26.5625	1	1	1	7.7908e+06	3.72
High	Q9DD18	D-aminoacyl-tRNA deacylase 1 OS=Mus musculus OX=10090 GN=Dtd1 PE=1 SV=2	FALSE	TRUE	7.17703	1	1	1		3.02
High	Q9D0M3	Cytochrome c1, heme protein, mitochondrial OS=Mus musculus OX=10090 GN=Cyc1 PE=1 SV=1	FALSE	TRUE	4	1	1	1	1.75029e+06	3.32
High	Q9CRD0	OCIA domain-containing protein 1 OS=Mus musculus OX=10090 GN=Ociad1 PE=1 SV=1	FALSE	TRUE	8.90688	1	2	1		6.07
High	B1AU75	Nuclear autoantigenic sperm protein OS=Mus musculus OX=10090 GN=Nasp PE=1 SV=1	FALSE	TRUE	6.46831	3	3	3	4.86033e+06	7.82
High	Q3UPH1	Protein PRRC1 OS=Mus musculus OX=10090 GN=Prrc1 PE=1 SV=1	FALSE	TRUE	2.93454	1	1	1	3.08065e+06	2.67
High	Q99K23	Ufm1-specific protease 2 OS=Mus musculus OX=10090 GN=Ufsp2 PE=1 SV=1	FALSE	TRUE	2.60304	2	2	2	2.89322e+06	1.91
High	Q91YP2	Neurolysin, mitochondrial OS=Mus musculus OX=10090 GN=Nln PE=1 SV=1	FALSE	TRUE	2.69886	1	1	1		3.39
High	Q9D880	Mitochondrial import inner membrane translocase subunit TIM50 OS=Mus musculus OX=10090 GN=Timm50 PE=1 SV=1	FALSE	TRUE	6.23229	2	2	2	19571061	5.08
High	Q05B55	IGK protein OS=Bos taurus GN=IGK PE=2 SV=1	TRUE	FALSE	8.75	1	1	1		3.12
High	Q8C5H8	NAD kinase 2, mitochondrial OS=Mus musculus OX=10090 GN=Nadk2 PE=1 SV=2	FALSE	TRUE	5.0885	2	2	2	1.84875e+07	4.71
High	Q9WVB0	RNA-binding protein with multiple splicing OS=Mus musculus OX=10090 GN=Rbpms PE=1 SV=2	FALSE	TRUE	7.61421	1	1	1	1590420	2.64
High	B2C3G8	Signal transducer and activator of transcription OS=Mus musculus OX=10090 GN=Stat5a PE=1 SV=1	FALSE	TRUE	3.13676	2	2	2	6.18622e+06	5
High	Q8BJW6	Eukaryotic translation initiation factor 2A OS=Mus musculus OX=10090 GN=Eif2a PE=1 SV=2	FALSE	TRUE	4.81928	2	2	2	2.65343e+07	6.46
High	Q9D881	Cytochrome c oxidase subunit 5B, mitochondrial OS=Mus musculus OX=10090 GN=Cox5b-ps PE=1 SV=1	FALSE	TRUE	9.30233	1	2	1	1.4441e+08	5.1
High	A0A0A0MQ97	F-box only protein 50 OS=Mus musculus OX=10090 GN=Nccrp1 PE=1 SV=1	FALSE	TRUE	7.90378	2	2	2	14076685	4.67
High	P28653	Biglycan OS=Mus musculus OX=10090 GN=Bgn PE=1 SV=1	FALSE	TRUE	6.50407	2	3	2	2.52277e+07	6.35
High	P50516	V-type proton ATPase catalytic subunit A OS=Mus musculus OX=10090 GN=Atp6v1a PE=1 SV=2	FALSE	TRUE	2.43112	1	1	1	24678398	3.63
High	Q922Q1	Mitochondrial amidoxime reducing component 2 OS=Mus musculus OX=10090 GN=Marc2 PE=1 SV=1	FALSE	TRUE	4.43787	1	1	1		3.3
High	Q3UGS4	Mapk-regulated corepressor-interacting protein 1 OS=Mus musculus OX=10090 GN=Mcrip1 PE=1 SV=1	FALSE	TRUE	18.5567	1	3	1	1.53527e+07	7.61
High	Q9D892	Inosine triphosphate pyrophosphatase OS=Mus musculus OX=10090 GN=Itpa PE=1 SV=2	FALSE	TRUE	7.07071	1	1	1		2.57
High	A0A2R8W6P0	Leukocyte surface antigen CD47 OS=Mus musculus OX=10090 GN=Cd47 PE=1 SV=1	FALSE	TRUE	3.80117	1	1	1	1.64111e+07	2.76
High	Q8R5L1	Complement component 1 Q subcomponent-binding protein, mitochondrial OS=Mus musculus OX=10090 GN=C1qbp PE=1 SV=1	FALSE	TRUE	4.6595	1	1	1	3.40576e+07	3.02
High	O35495	Cyclin-dependent kinase 14 OS=Mus musculus OX=10090 GN=Cdk14 PE=1 SV=2	FALSE	TRUE	2.77186	1	1	1	6.2055e+06	2.86
High	Q9CQY3	Uncharacterized protein OS=Mus musculus OX=10090 GN=Atp5l PE=2 SV=1	FALSE	TRUE	11.6279	1	1	1	20260969	2.71
High	Q3TJD4	Uncharacterized protein OS=Mus musculus OX=10090 GN=Atp5pb PE=2 SV=1	FALSE	TRUE	9.375	3	4	3	2.40353e+07	6.36
High	Q9D809	RIKEN cDNA 2200002D01 gene OS=Mus musculus OX=10090 GN=2200002D01Rik PE=1 SV=1	FALSE	TRUE	12.2807	1	2	1		6.25
High	P01887	Beta-2-microglobulin OS=Mus musculus OX=10090 GN=B2m PE=1 SV=2	FALSE	TRUE	8.40336	1	2	1	729284	1.69
High	Q9DCE5	p21-activated protein kinase-interacting protein 1 OS=Mus musculus OX=10090 GN=Pak1ip1 PE=1 SV=2	FALSE	TRUE	3.40314	1	1	1	1.13117e+07	2.98
High	Q8C1Y6	Signal recognition particle 54 kDa protein OS=Mus musculus OX=10090 GN=Srp54c PE=2 SV=1	FALSE	TRUE	4.98008	2	2	2	1.18873e+06	4.81
High	P56212	cAMP-regulated phosphoprotein 19 OS=Mus musculus OX=10090 GN=Arpp19 PE=1 SV=2	FALSE	TRUE	17.8571	1	1	1	6.26913e+06	2.95
High	Q505A8	Ribosomal protein L39 OS=Mus musculus OX=10090 GN=Rpl39 PE=2 SV=1	FALSE	TRUE	19.6078	1	3	1	79372524	6.69
High	O70194	Eukaryotic translation initiation factor 3 subunit D OS=Mus musculus OX=10090 GN=Eif3d PE=1 SV=2	FALSE	TRUE	2.55474	1	1	1	1.81197e+07	2.78
High	P97384	Annexin A11 OS=Mus musculus OX=10090 GN=Anxa11 PE=1 SV=2	FALSE	TRUE	4.57256	2	2	2		4.58
High	Q9D7B2	LIM and senescent cell antigen-like-containing domain protein OS=Mus musculus OX=10090 GN=Lims1 PE=1 SV=2	FALSE	TRUE	3.0303	1	1	1	30326375	2.61
High	Q8VDC3	Cytoplasmic aconitase OS=Mus musculus OX=10090 GN=aco1 PE=3 SV=1	FALSE	TRUE	3.33704	3	4	3	7.48656e+06	4.6
High	Q9CWW6	Peptidyl-prolyl cis-trans isomerase NIMA-interacting 4 OS=Mus musculus OX=10090 GN=Pin4 PE=1 SV=1	FALSE	TRUE	16.7939	2	2	2	2.76983e+06	5.16
High	Q9EQ06	Estradiol 17-beta-dehydrogenase 11 OS=Mus musculus OX=10090 GN=Hsd17b11 PE=1 SV=1	FALSE	TRUE	8.05369	2	2	2	2.31769e+06	4.82
High	Q9WVA2	Mitochondrial import inner membrane translocase subunit Tim8 A OS=Mus musculus OX=10090 GN=Timm8a1 PE=1 SV=1	FALSE	TRUE	11.3402	1	1	1	2.18626e+07	3.07
High	P84104	Serine/arginine-rich splicing factor 3 OS=Mus musculus OX=10090 GN=Srsf3 PE=1 SV=1	FALSE	TRUE	14.0244	2	2	1	3.80897e+07	4.74
High	G3UZX4	Casein kinase II subunit beta OS=Mus musculus OX=10090 GN=Csnk2b PE=1 SV=1	FALSE	TRUE	4.28016	1	1	1	4.72333e+07	2.65
High	G3XA48	Isopentenyl-diphosphate Delta-isomerase 1 OS=Mus musculus OX=10090 GN=Idi1 PE=1 SV=1	FALSE	TRUE	4.24028	1	1	1	1.63595e+07	3.01
High	A0A087WNT1	Elongin-C OS=Mus musculus OX=10090 GN=Eloc PE=1 SV=1	FALSE	TRUE	19.403	2	2	2	10914744	5.5
High	G3UY42	Polyadenylate-binding protein 2 OS=Mus musculus OX=10090 GN=Pabpn1 PE=1 SV=1	FALSE	TRUE	5.32915	1	1	1	1.80327e+07	3.9
High	A0A0R4J034	Pyridoxal-dependent decarboxylase domain-containing protein 1 OS=Mus musculus OX=10090 GN=Pdxdc1 PE=1 SV=1	FALSE	TRUE	3.16857	2	2	2	1.6185e+07	4.85
High	Q3TJZ6	Protein FAM98A OS=Mus musculus OX=10090 GN=Fam98a PE=1 SV=1	FALSE	TRUE	2.91262	1	2	1	5.01159e+06	6.65
High	K9J7B2	UDP-glucuronosyltransferase OS=Mus musculus OX=10090 GN=Ugt1a6b PE=1 SV=1	FALSE	TRUE	3.76648	2	2	2	6.02677e+06	2.47
High	P40336	Vacuolar protein sorting-associated protein 26A OS=Mus musculus OX=10090 GN=Vps26a PE=1 SV=1	FALSE	TRUE	8.56269	2	2	2	16089252	6.13
High	E9PXY8	Ubiquitin carboxyl-terminal hydrolase 7 OS=Mus musculus OX=10090 GN=Usp7 PE=1 SV=1	FALSE	TRUE	1.5748	1	1	1		2.85
High	Q9JJI8	60S ribosomal protein L38 OS=Mus musculus OX=10090 GN=Rpl38 PE=1 SV=3	FALSE	TRUE	22.8571	2	5	1	1.36757e+07	11.18
High	O70492	Sorting nexin-3 OS=Mus musculus OX=10090 GN=Snx3 PE=1 SV=3	FALSE	TRUE	14.1975	3	3	2	2.25147e+07	1.75
High	A0A0R4J093	UMP-CMP kinase OS=Mus musculus OX=10090 GN=Cmpk1 PE=1 SV=1	FALSE	TRUE	5.72687	1	2	1	6.74135e+06	5.92
High	Q3UDM0	MOB kinase activator 1B OS=Mus musculus OX=10090 GN=Mob1b PE=1 SV=1	FALSE	TRUE	11.7647	3	3	3	7.26413e+06	6.01
High	Q4FK49	Pyp protein OS=Mus musculus OX=10090 GN=Ppa1 PE=1 SV=1	FALSE	TRUE	10.7266	3	3	3	3.12317e+07	6.49
High	Q8CJG0	Protein argonaute-2 OS=Mus musculus OX=10090 GN=Ago2 PE=1 SV=3	FALSE	TRUE	2.7907	2	2	2		4.69
High	A0A571BEC9	Perilipin-4 OS=Mus musculus OX=10090 GN=Plin4 PE=1 SV=1	FALSE	TRUE	8.43223	1	1	1	9.51696e+06	2.58
High	G3UZA7	Small ubiquitin-related modifier OS=Mus musculus OX=10090 GN=Sumo3 PE=1 SV=1	FALSE	TRUE	10.6195	1	1	1	2.58341e+07	1.93
High	Q8CCX5	Keratin-like protein KRT222 OS=Mus musculus OX=10090 GN=Krt222 PE=2 SV=1	FALSE	TRUE	6.80272	2	13	1		30.9
High	Q3ULG4	VWFA domain-containing protein OS=Mus musculus OX=10090 GN=Psmd4 PE=2 SV=1	FALSE	TRUE	3.95778	1	2	1	4.93194e+07	6.41
High	Q3UE11	Fe2OG dioxygenase domain-containing protein OS=Mus musculus OX=10090 PE=2 SV=1	FALSE	TRUE	1.51099	1	1	1		2.71
High	E9QNN1	ATP-dependent RNA helicase A OS=Mus musculus OX=10090 GN=Dhx9 PE=1 SV=1	FALSE	TRUE	1.95087	2	3	2	2.8964e+07	7.58
High	B2RTB0	PDGFA associated protein 1 OS=Mus musculus OX=10090 GN=Pdap1 PE=1 SV=1	FALSE	TRUE	13.2597	2	2	2	5.47359e+06	5.19
High	P11157	Ribonucleoside-diphosphate reductase subunit M2 OS=Mus musculus OX=10090 GN=Rrm2 PE=1 SV=1	FALSE	TRUE	3.58974	1	1	1		2.75
High	A2RTI3	Legumain OS=Mus musculus OX=10090 GN=Lgmn PE=1 SV=1	FALSE	TRUE	2.75862	1	1	1		3.16
High	Q9D6K8	FUN14 domain-containing protein 2 OS=Mus musculus OX=10090 GN=Fundc2 PE=1 SV=1	FALSE	TRUE	7.28477	1	1	1	34551987	2.74
High	P60670	Nuclear protein localization protein 4 homolog OS=Mus musculus OX=10090 GN=Nploc4 PE=1 SV=3	FALSE	TRUE	5.92105	3	3	3	4.60798e+06	4.85
High	Q3U1C2	RuvB-like helicase OS=Mus musculus OX=10090 GN=Ruvbl1 PE=1 SV=1	FALSE	TRUE	2.19298	1	2	1	6.14835e+06	4.92
High	P70441	Na(+)/H(+) exchange regulatory cofactor NHE-RF1 OS=Mus musculus OX=10090 GN=Slc9a3r1 PE=1 SV=3	FALSE	TRUE	8.73239	2	2	2	6.88424e+06	5.26
High	Q3UK27	NEDD8-activating enzyme E1 regulatory subunit OS=Mus musculus OX=10090 GN=Nae1 PE=1 SV=1	FALSE	TRUE	2.80899	1	1	1	1.93743e+07	3.01
High	Q3T9B4	Exonuclease domain-containing protein OS=Mus musculus OX=10090 GN=Rexo2 PE=2 SV=1	FALSE	TRUE	12.6582	2	2	2	36963930	5.78
High	Q8CHP8	Glycerol-3-phosphate phosphatase OS=Mus musculus OX=10090 GN=Pgp PE=1 SV=1	FALSE	TRUE	7.16511	2	2	2	2.38501e+07	4.79
High	Q9CY64	Biliverdin reductase A OS=Mus musculus OX=10090 GN=Blvra PE=1 SV=1	FALSE	TRUE	8.13559	2	2	2	6.95411e+06	4.44
High	P09671	Superoxide dismutase [Mn], mitochondrial OS=Mus musculus OX=10090 GN=Sod2 PE=1 SV=3	FALSE	TRUE	6.30631	1	1	1	1.94254e+07	2.74
High	Q3SZR3	Alpha-1-acid glycoprotein OS=Bos taurus GN=ORM1 PE=2 SV=1	TRUE	FALSE	8.91089	1	1	1	23169163	3.36
High	Q3UDZ1	Uncharacterized protein OS=Mus musculus OX=10090 GN=Rhog PE=1 SV=1	FALSE	TRUE	15.7068	2	2	1	4.79093e+07	5.15
High	P84102	Small EDRK-rich factor 2 OS=Mus musculus OX=10090 GN=Serf2 PE=1 SV=1	FALSE	TRUE	30.5085	2	2	2	3.3074e+06	5.36
High	Q9CX86	Heterogeneous nuclear ribonucleoprotein A0 OS=Mus musculus OX=10090 GN=Hnrnpa0 PE=1 SV=1	FALSE	TRUE	5.2459	1	1	1		2.96
High	Q6PFB2	Rcc1 protein OS=Mus musculus OX=10090 GN=Rcc1 PE=1 SV=1	FALSE	TRUE	4.37788	1	1	1	4.67632e+06	3.96
High	A0A1B0GSU0	Aldehyde dehydrogenase family 16 member A1 OS=Mus musculus OX=10090 GN=Aldh16a1 PE=1 SV=1	FALSE	TRUE	2.36908	1	1	1		4.11
High	Q3UZ39	Leucine-rich repeat flightless-interacting protein 1 OS=Mus musculus OX=10090 GN=Lrrfip1 PE=1 SV=2	FALSE	TRUE	2.88066	1	1	1	1.85574e+07	4.13
High	Q7TSS3	Inhibitor of kappaB kinase gamma OS=Mus musculus OX=10090 GN=Ikbkg PE=1 SV=1	FALSE	TRUE	3.48837	1	1	1		2.49
High	B7ZWC4	Insulin-like growth factor 2 receptor OS=Mus musculus OX=10090 GN=Igf2r PE=2 SV=1	FALSE	TRUE	1.00685	2	2	2	6.94614e+06	5.66
High	Q5EG47	5'-AMP-activated protein kinase catalytic subunit alpha-1 OS=Mus musculus OX=10090 GN=Prkaa1 PE=1 SV=2	FALSE	TRUE	2.50447	1	1	1		3.22
High	P69905	Hemoglobin subunit alpha OS=Homo sapiens GN=HBA1 PE=1 SV=2	TRUE	FALSE	10.5634	1	1	1	9.18752e+06	3.26
High	Q9D8B3	Charged multivesicular body protein 4b OS=Mus musculus OX=10090 GN=Chmp4b PE=1 SV=2	FALSE	TRUE	10.7143	2	2	2	3.61695e+06	5.89
High	P17439	Lysosomal acid glucosylceramidase OS=Mus musculus OX=10090 GN=Gba PE=1 SV=1	FALSE	TRUE	3.8835	2	2	2	4.33803e+06	4.31
High	Q61081	Hsp90 co-chaperone Cdc37 OS=Mus musculus OX=10090 GN=Cdc37 PE=1 SV=1	FALSE	TRUE	3.95778	1	1	1	24753273	3.9
High	A1L2Z3	C230096C10Rik protein OS=Mus musculus OX=10090 GN=Emc1 PE=2 SV=1	FALSE	TRUE	2.00602	2	2	2	5.89098e+06	4.87
High	Q3TE40	Replication protein A 32 kDa subunit OS=Mus musculus OX=10090 GN=Rpa2 PE=1 SV=1	FALSE	TRUE	8.88889	2	2	2		5.6
High	O54734	Dolichyl-diphosphooligosaccharide--protein glycosyltransferase 48 kDa subunit OS=Mus musculus OX=10090 GN=Ddost PE=1 SV=2	FALSE	TRUE	4.30839	2	2	2	9.90503e+07	3.61
High	A0A286YCG8	Translocon-associated protein subunit alpha OS=Mus musculus OX=10090 GN=Ssr1 PE=1 SV=1	FALSE	TRUE	5.97484	2	2	2	1.69771e+07	4.11
High	Q6PDI5	Proteasome adapter and scaffold protein ECM29 OS=Mus musculus OX=10090 GN=Ecpas PE=1 SV=3	FALSE	TRUE	0.652174	1	1	1	3.85931e+06	2.05
High	Q9CSH3	Exosome complex exonuclease RRP44 OS=Mus musculus OX=10090 GN=Dis3 PE=1 SV=4	FALSE	TRUE	2.71399	2	2	2	5.1944e+06	5.37
High	O35344	Importin subunit alpha-4 OS=Mus musculus OX=10090 GN=Kpna3 PE=1 SV=1	FALSE	TRUE	4.41459	2	2	1		5.18
High	Q8CEW9	Splicing factor 3B subunit 5 OS=Mus musculus OX=10090 GN=Sf3b5 PE=2 SV=1	FALSE	TRUE	15.1163	1	1	1	1.466e+07	3.31
High	Q3TXT9	PlsC domain-containing protein OS=Mus musculus OX=10090 GN=Agpat3 PE=2 SV=1	FALSE	TRUE	7.71277	2	2	2	1.55602e+07	6.47
High	G3X8Y3	N-alpha-acetyltransferase 15, NatA auxiliary subunit OS=Mus musculus OX=10090 GN=Naa15 PE=1 SV=1	FALSE	TRUE	2.31214	2	2	2	1.03825e+07	4.61
High	P02788	Lactotransferrin OS=Homo sapiens GN=LTF PE=1 SV=6	TRUE	FALSE	4.78873	3	3	2		6.71
High	F8VPN4	Amylo-1,6-glucosidase, 4-alpha-glucanotransferase OS=Mus musculus OX=10090 GN=Agl PE=1 SV=1	FALSE	TRUE	0.913838	1	1	1	1.38996e+06	2.77
High	Q6ZWV7	60S ribosomal protein L35 OS=Mus musculus OX=10090 GN=Rpl35 PE=1 SV=1	FALSE	TRUE	18.6992	2	2	2	8.00987e+06	2.64
High	Q9CYG7	Mitochondrial import receptor subunit TOM34 OS=Mus musculus OX=10090 GN=Tomm34 PE=1 SV=1	FALSE	TRUE	4.85437	1	1	1		3.29
High	P84089	Enhancer of rudimentary homolog OS=Mus musculus OX=10090 GN=Erh PE=1 SV=1	FALSE	TRUE	11.5385	1	2	1	110565657	6.31
High	A0A087WQT6	Caspase-8 OS=Mus musculus OX=10090 GN=Casp8 PE=1 SV=1	FALSE	TRUE	2.8	1	1	1	7.40031e+06	3.82
High	P01966	Hemoglobin subunit alpha OS=Bos taurus GN=HBA PE=1 SV=2	TRUE	FALSE	10.5634	1	1	1	1.31627e+07	3.25
High	A0A141CM32	ATP synthase protein 8 OS=Mus musculus OX=10090 GN=ATP8 PE=3 SV=1	FALSE	TRUE	19.403	1	1	1		1.9
High	Q9Z0H8	CAP-Gly domain-containing linker protein 2 OS=Mus musculus OX=10090 GN=Clip2 PE=1 SV=2	FALSE	TRUE	1.24164	1	1	1	5.52033e+06	2.12
High	Q9CQF3	Cleavage and polyadenylation specificity factor subunit 5 OS=Mus musculus OX=10090 GN=Nudt21 PE=1 SV=1	FALSE	TRUE	7.92952	1	1	1	4.58746e+06	3.27
High	A2AQR0	Glycerol-3-phosphate dehydrogenase OS=Mus musculus OX=10090 GN=Gpd2 PE=1 SV=1	FALSE	TRUE	3.48993	2	2	2	8.98505e+06	4.7
High	P56391	Cytochrome c oxidase subunit 6B1 OS=Mus musculus OX=10090 GN=Cox6b1 PE=1 SV=2	FALSE	TRUE	12.7907	1	1	1	1.2635e+07	2.73
High	O70401	Tetraspanin-6 OS=Mus musculus OX=10090 GN=Tspan6 PE=1 SV=1	FALSE	TRUE	4.89796	1	1	1	1.18506e+07	2.46
High	A0A1W2P768	H3 clustered histone 14 OS=Mus musculus OX=10090 GN=H3c14 PE=3 SV=1	FALSE	TRUE	7.73481	2	4	2	9.58416e+07	7.88
High	Q8BU31	Ras-related protein Rap-2c OS=Mus musculus OX=10090 GN=Rap2c PE=1 SV=1	FALSE	TRUE	10.929	2	3	2	7.77345e+06	6.28
High	Q564F6	Programmed cell death 5 OS=Mus musculus OX=10090 GN=Pdcd5 PE=1 SV=1	FALSE	TRUE	17.4603	2	2	2	7.18287e+06	2.98
High	Q923F1	Chloride channel, nucleotide-sensitive, 1A OS=Mus musculus OX=10090 GN=Clns1a PE=1 SV=1	FALSE	TRUE	5.39419	1	1	1	1.46414e+07	2.84
High	P63213	Guanine nucleotide-binding protein G(I)/G(S)/G(O) subunit gamma-2 OS=Mus musculus OX=10090 GN=Gng2 PE=1 SV=2	FALSE	TRUE	19.7183	1	1	1	4.80119e+06	3.14
High	Q9DBZ5	Eukaryotic translation initiation factor 3 subunit K OS=Mus musculus OX=10090 GN=Eif3k PE=1 SV=1	FALSE	TRUE	6.42202	1	1	1		2.68
High	Q3UMQ2	CBFD_NFYB_HMF domain-containing protein OS=Mus musculus OX=10090 GN=Dr1 PE=2 SV=1	FALSE	TRUE	8.52273	1	1	1		1.91
High	B9EIE9	Adenylosuccinate synthetase isozyme 2 OS=Mus musculus OX=10090 GN=Adss PE=1 SV=1	FALSE	TRUE	2.41228	1	1	1	15330159	2.68
High	Q8C671	RRM domain-containing protein OS=Mus musculus OX=10090 GN=Srsf2 PE=2 SV=1	FALSE	TRUE	9.84252	2	2	2	4.09752e+06	5.01
High	Q9JIX8	Apoptotic chromatin condensation inducer in the nucleus OS=Mus musculus OX=10090 GN=Acin1 PE=1 SV=3	FALSE	TRUE	0.896861	1	1	1	2.82807e+06	2.9
High	P57784	U2 small nuclear ribonucleoprotein A' OS=Mus musculus OX=10090 GN=Snrpa1 PE=1 SV=2	FALSE	TRUE	5.4902	1	1	1	5.82317e+06	2.83
High	P48771	Cytochrome c oxidase subunit 7A2, mitochondrial OS=Mus musculus OX=10090 GN=Cox7a2 PE=1 SV=2	FALSE	TRUE	27.7108	2	2	2	1.67377e+07	4.21
High	Q80VD1	Protein FAM98B OS=Mus musculus OX=10090 GN=Fam98b PE=1 SV=1	FALSE	TRUE	2.5641	1	1	1		2.87
High	Q58E35	Ribosomal protein, large, P1 OS=Mus musculus OX=10090 GN=Rplp1 PE=1 SV=1	FALSE	TRUE	37.7193	1	1	1		4.71
High	A0A1S6GWH0	Uncharacterized protein OS=Mus musculus OX=10090 GN=Gabarap PE=2 SV=1	FALSE	TRUE	11.0429	2	2	2	1.71484e+06	1.63
High	O35381	Acidic leucine-rich nuclear phosphoprotein 32 family member A OS=Mus musculus OX=10090 GN=Anp32a PE=1 SV=1	FALSE	TRUE	7.69231	2	2	2	8.70422e+06	5.07
High	P47915	60S ribosomal protein L29 OS=Mus musculus OX=10090 GN=Rpl29 PE=1 SV=2	FALSE	TRUE	6.875	1	1	1	6.25382e+06	2.11
High	Q91YR5	eEF1A lysine and N-terminal methyltransferase OS=Mus musculus OX=10090 GN=EEF1AKNMT PE=1 SV=1	FALSE	TRUE	2.149	1	1	1	1.64913e+06	2.82
High	Q3U1Q4	Uncharacterized protein OS=Mus musculus OX=10090 GN=Grb2 PE=2 SV=1	FALSE	TRUE	10.1382	2	2	2		4.19
High	Q3TC91	Uncharacterized protein OS=Mus musculus OX=10090 GN=Cpsf3 PE=2 SV=1	FALSE	TRUE	2.33918	1	1	1	3.62178e+06	0
High	A0A0A6YX26	60S ribosomal protein L31 OS=Mus musculus OX=10090 GN=Rpl31 PE=1 SV=1	FALSE	TRUE	13.1783	2	2	2	1.46239e+07	3.96
High	P70280	Vesicle-associated membrane protein 7 OS=Mus musculus OX=10090 GN=Vamp7 PE=1 SV=1	FALSE	TRUE	8.63636	2	2	2	9.06255e+06	2.44
High	P62843	40S ribosomal protein S15 OS=Mus musculus OX=10090 GN=Rps15 PE=1 SV=2	FALSE	TRUE	8.96552	2	4	2	3.26599e+06	5.24
High	Q9D0C4	tRNA (guanine(37)-N1)-methyltransferase OS=Mus musculus OX=10090 GN=Trmt5 PE=1 SV=1	FALSE	TRUE	2.99401	1	1	1		3.1
High	B1ATI0	Aldehyde dehydrogenase OS=Mus musculus OX=10090 GN=Aldh3a2 PE=1 SV=1	FALSE	TRUE	2.63158	1	1	1	8.71013e+06	2.55
High	A0A571BEK9	Squalene synthase OS=Mus musculus OX=10090 GN=Fdft1 PE=1 SV=1	FALSE	TRUE	2.6087	1	1	1		2.56
High	Q2UZW7	Microtubule-associated protein OS=Mus musculus OX=10090 GN=Mapre3 PE=1 SV=1	FALSE	TRUE	7.11744	2	2	1	5.02752e+06	4.37
High	A0A0F7IQ06	Alpha v integrin OS=Mus musculus OX=10090 GN=Itgav PE=2 SV=1	FALSE	TRUE	2.49042	2	2	2	5.43684e+06	4.99
High	P05201	Aspartate aminotransferase, cytoplasmic OS=Mus musculus OX=10090 GN=Got1 PE=1 SV=3	FALSE	TRUE	3.38983	1	1	1	2.47393e+07	2.85
High	Q9QXT0	Protein canopy homolog 2 OS=Mus musculus OX=10090 GN=Cnpy2 PE=1 SV=1	FALSE	TRUE	8.79121	1	1	1	2.84944e+07	2.93
High	Q6A0C9	MKIAA0109 protein (Fragment) OS=Mus musculus OX=10090 GN=Ap2m1 PE=2 SV=1	FALSE	TRUE	3.44037	1	1	1	6.67883e+06	2.83
High	P16460	Argininosuccinate synthase OS=Mus musculus OX=10090 GN=Ass1 PE=1 SV=1	FALSE	TRUE	4.36893	2	4	2	3.76131e+07	7.19
High	Q60737	Casein kinase II subunit alpha OS=Mus musculus OX=10090 GN=Csnk2a1 PE=1 SV=2	FALSE	TRUE	3.32481	1	1	1	6.40662e+06	2.49
High	Q3UJY1	Uncharacterized protein OS=Mus musculus OX=10090 GN=Slc29a1 PE=2 SV=1	FALSE	TRUE	2.6087	1	1	1	4.30278e+07	2.4
High	Q6PDY2	2-aminoethanethiol dioxygenase OS=Mus musculus OX=10090 GN=Ado PE=1 SV=2	FALSE	TRUE	6.25	1	1	1	16002960	0
High	Q9CQZ5	NADH dehydrogenase [ubiquinone] 1 alpha subcomplex subunit 6 OS=Mus musculus OX=10090 GN=Ndufa6 PE=1 SV=1	FALSE	TRUE	12.9771	1	1	1	1.09654e+07	2.92
High	Q9D1R9	60S ribosomal protein L34 OS=Mus musculus OX=10090 GN=Rpl34 PE=1 SV=2	FALSE	TRUE	14.5299	2	2	2	3.06499e+06	1.86
High	Q07235	Glia-derived nexin OS=Mus musculus OX=10090 GN=Serpine2 PE=1 SV=2	FALSE	TRUE	3.02267	1	1	1	3278471	2.66
High	P0DOV2	Interferon-activable protein 204 OS=Mus musculus OX=10090 GN=Ifi204 PE=1 SV=1	FALSE	TRUE	1.93861	1	1	1	5.14206e+06	2.66
High	Q8K0D5	Elongation factor G, mitochondrial OS=Mus musculus OX=10090 GN=Gfm1 PE=1 SV=1	FALSE	TRUE	2.66312	2	2	2	1.09638e+07	4.16
High	Q9D8C9	Purine nucleoside phosphorylase OS=Mus musculus OX=10090 GN=Pnp2 PE=1 SV=1	FALSE	TRUE	3.27869	1	1	1	42637301	2.53
High	Q3U7P4	Uncharacterized protein OS=Mus musculus OX=10090 GN=Jpt2 PE=2 SV=1	FALSE	TRUE	14.7368	2	2	2	7.28318e+07	2.88
High	Q3TJN6	Sorting nexin OS=Mus musculus OX=10090 GN=Snx5 PE=2 SV=1	FALSE	TRUE	2.47525	1	1	1		2.54
High	Q8JZU2	Tricarboxylate transport protein, mitochondrial OS=Mus musculus OX=10090 GN=Slc25a1 PE=1 SV=1	FALSE	TRUE	5.14469	2	2	2	2.47325e+06	3.41
High	O88456	Calpain small subunit 1 OS=Mus musculus OX=10090 GN=Capns1 PE=1 SV=1	FALSE	TRUE	9.29368	2	3	2	7.80745e+06	4.7
High	Q9D8S9	BolA-like protein 1 OS=Mus musculus OX=10090 GN=Bola1 PE=1 SV=1	FALSE	TRUE	11.6788	1	1	1	3.83938e+06	2.74
High	Q3UC67	AMP-binding domain-containing protein OS=Mus musculus OX=10090 GN=Acsl5 PE=1 SV=1	FALSE	TRUE	1.90337	1	1	1	3.52367e+06	2.42
High	Q8BME1	Phosphoacetylglucosamine mutase OS=Mus musculus OX=10090 GN=Pgm3 PE=2 SV=1	FALSE	TRUE	4.37956	2	2	2	2.02179e+07	4.89
High	Q8CDM8	Protein FAM160B1 OS=Mus musculus OX=10090 GN=Fam160b1 PE=1 SV=2	FALSE	TRUE	1.57068	1	1	1	3.93752e+06	3.18
High	Q3UYX6	RRM domain-containing protein OS=Mus musculus OX=10090 GN=Srsf10 PE=2 SV=1	FALSE	TRUE	7.91367	2	2	2	12486828	4.48
High	Q8CGB9	Insulin degrading enzyme OS=Mus musculus OX=10090 GN=Ide PE=2 SV=1	FALSE	TRUE	2.06084	2	2	2	2.50459e+07	4.74
High	E9PYD5	Transcription elongation factor A protein 1 OS=Mus musculus OX=10090 GN=Tcea1 PE=1 SV=1	FALSE	TRUE	3.84615	1	1	1	16149168	0
High	P62334	26S proteasome regulatory subunit 10B OS=Mus musculus OX=10090 GN=Psmc6 PE=1 SV=1	FALSE	TRUE	3.08483	1	1	1	1.04501e+07	3.03
High	Q920L1	Acyl-CoA (8-3)-desaturase OS=Mus musculus OX=10090 GN=Fads1 PE=1 SV=1	FALSE	TRUE	2.23714	2	3	2	8.96856e+06	4.35
High	P97370	Sodium/potassium-transporting ATPase subunit beta-3 OS=Mus musculus OX=10090 GN=Atp1b3 PE=1 SV=1	FALSE	TRUE	6.83453	2	2	2	5.80767e+06	4.36
High	Q91ZJ5	UTP--glucose-1-phosphate uridylyltransferase OS=Mus musculus OX=10090 GN=Ugp2 PE=1 SV=3	FALSE	TRUE	4.52756	2	2	2	8.88356e+06	4.34
High	A0A1S6GWJ8	Uncharacterized protein OS=Mus musculus OX=10090 GN=Hnrnpm PE=2 SV=1	FALSE	TRUE	1.3597	1	1	1		2.61
High	Q3UGB5	DAZ-associated protein 1 OS=Mus musculus OX=10090 GN=Dazap1 PE=1 SV=1	FALSE	TRUE	3.94089	1	1	1	4.44219e+06	3.04
High	Q8CC13	AP complex subunit beta OS=Mus musculus OX=10090 GN=Ap1b1 PE=2 SV=1	FALSE	TRUE	2.20357	2	2	2		4.52
High	P14602	Heat shock protein beta-1 OS=Mus musculus OX=10090 GN=Hspb1 PE=1 SV=3	FALSE	TRUE	4.78469	1	1	1	6976699	2.14
High	A0A0A0MQ90	Protein S100-A13 OS=Mus musculus OX=10090 GN=S100a13 PE=1 SV=1	FALSE	TRUE	13.75	2	2	2	4.49061e+06	4.87
High	Q9JLB0	MAGUK p55 subfamily member 6 OS=Mus musculus OX=10090 GN=Mpp6 PE=1 SV=1	FALSE	TRUE	2.71248	1	1	1		2.51
High	A0A1L1STE4	Interleukin enhancer-binding factor 3 OS=Mus musculus OX=10090 GN=Ilf3 PE=1 SV=1	FALSE	TRUE	2.20264	2	2	2	4.71299e+06	3.93
High	O54782	Epididymis-specific alpha-mannosidase OS=Mus musculus OX=10090 GN=Man2b2 PE=1 SV=2	FALSE	TRUE	1.08055	1	1	1		2.72
High	Q6ZWQ6	Uncharacterized protein OS=Mus musculus OX=10090 GN=Ube2k PE=1 SV=1	FALSE	TRUE	7.5	1	1	1	8.12844e+07	2.72
High	Q8C878	NEDD8-activating enzyme E1 catalytic subunit OS=Mus musculus OX=10090 GN=Uba3 PE=1 SV=2	FALSE	TRUE	2.5974	1	1	1	1.61774e+07	2.44
High	P02663	Alpha-S2-casein OS=Bos taurus GN=CSN1S2 PE=1 SV=2	TRUE	FALSE	4.95495	1	2	1	89606970	4.89
High	Q9D0J4	ADP-ribosylation factor-like protein 2 OS=Mus musculus OX=10090 GN=Arl2 PE=1 SV=1	FALSE	TRUE	5.43478	1	1	1	13308846	2.51
High	Q3UY05	Uncharacterized protein OS=Mus musculus OX=10090 GN=Ndufs8 PE=2 SV=1	FALSE	TRUE	5.18868	1	1	1	4.43874e+06	2.9
High	O08547	Vesicle-trafficking protein SEC22b OS=Mus musculus OX=10090 GN=Sec22b PE=1 SV=3	FALSE	TRUE	8.83721	1	1	1	4.218e+06	2.68
High	Q9ESZ8	General transcription factor II-I OS=Mus musculus OX=10090 GN=Gtf2i PE=1 SV=3	FALSE	TRUE	1.60321	1	1	1	1.03857e+06	2.13
High	O88271	Craniofacial development protein 1 OS=Mus musculus OX=10090 GN=Cfdp1 PE=1 SV=1	FALSE	TRUE	7.11864	1	1	1	8.49629e+06	2.99
High	Q545N8	Phosphomannomutase OS=Mus musculus OX=10090 GN=Pmm2 PE=1 SV=1	FALSE	TRUE	5.3719	1	1	1	2.38625e+06	2.6
High	Q6ZWX2	Thymosin beta OS=Mus musculus OX=10090 GN=Tmsb4x PE=2 SV=1	FALSE	TRUE	50	2	2	1	9.45089e+06	2.36
High	Q9R269	Periplakin OS=Mus musculus OX=10090 GN=Ppl PE=1 SV=1	FALSE	TRUE	0.569801	1	1	1	1.02405e+07	2.39
High	A0A2I3BR29	Protein FAM107B OS=Mus musculus OX=10090 GN=Fam107b PE=1 SV=1	FALSE	TRUE	4.23453	1	1	1	20418970	3.28
High	Q3UQ84	Threonine--tRNA ligase, mitochondrial OS=Mus musculus OX=10090 GN=Tars2 PE=1 SV=1	FALSE	TRUE	1.93638	1	1	1	4.44401e+06	2.76
High	P24527	Leukotriene A-4 hydrolase OS=Mus musculus OX=10090 GN=Lta4h PE=1 SV=4	FALSE	TRUE	5.07365	2	2	2		3.35
High	Q8CBY8	Dynactin subunit 4 OS=Mus musculus OX=10090 GN=Dctn4 PE=1 SV=1	FALSE	TRUE	2.99786	1	1	1		3.34
High	Q62348	Translin OS=Mus musculus OX=10090 GN=Tsn PE=1 SV=1	FALSE	TRUE	10.9649	2	2	2	3.17131e+06	4.24
High	Q5XKN4	Protein jagunal homolog 1 OS=Mus musculus OX=10090 GN=Jagn1 PE=1 SV=2	FALSE	TRUE	6.55738	1	1	1	1.56188e+06	0
High	Q91VM9	Inorganic pyrophosphatase 2, mitochondrial OS=Mus musculus OX=10090 GN=Ppa2 PE=1 SV=1	FALSE	TRUE	3.93939	1	1	1	1.15791e+07	2.67
High	P11688	Integrin alpha-5 OS=Mus musculus OX=10090 GN=Itga5 PE=1 SV=3	FALSE	TRUE	1.9943	2	3	2	25968975	4.61
High	Q99LD8	N(G),N(G)-dimethylarginine dimethylaminohydrolase 2 OS=Mus musculus OX=10090 GN=Ddah2 PE=1 SV=1	FALSE	TRUE	3.50877	1	1	1	1.52112e+07	2.6
High	A0A0R4J0R1	Vesicle-associated membrane protein 8 OS=Mus musculus OX=10090 GN=Vamp8 PE=1 SV=1	FALSE	TRUE	17.8218	2	2	2	1.19063e+07	2.12
High	Q31129	MHC class I cell surface glycoprotein OS=Mus musculus OX=10090 GN=H2-T24 PE=2 SV=2	FALSE	TRUE	3.35052	1	2	1	1.16404e+07	5.94
High	Q544F6	Cotl1 protein OS=Mus musculus OX=10090 GN=Cotl1 PE=1 SV=1	FALSE	TRUE	11.2676	2	2	2	5.88373e+06	1.78
High	Q61838	Pregnancy zone protein OS=Mus musculus OX=10090 GN=Pzp PE=1 SV=3	FALSE	TRUE	0.602007	1	2	1	2.84251e+07	5.17
High	Q80VJ3	2'-deoxynucleoside 5'-phosphate N-hydrolase 1 OS=Mus musculus OX=10090 GN=Dnph1 PE=1 SV=2	FALSE	TRUE	8.09249	1	1	1	1.6887e+06	2.12
High	P62317	Small nuclear ribonucleoprotein Sm D2 OS=Mus musculus OX=10090 GN=Snrpd2 PE=1 SV=1	FALSE	TRUE	15.2542	2	2	2	3.2174e+06	4.4
High	Q4V9X1	Ribosome biogenesis protein WDR12 OS=Mus musculus OX=10090 GN=Wdr12 PE=1 SV=1	FALSE	TRUE	2.83688	1	2	1	7.91888e+06	2.39
High	Q9CQ71	Replication protein A 14 kDa subunit OS=Mus musculus OX=10090 GN=Rpa3 PE=1 SV=1	FALSE	TRUE	8.26446	1	1	1		1.94
High	Q3UVN5	Uncharacterized protein OS=Mus musculus OX=10090 GN=Nsfl1c PE=2 SV=1	FALSE	TRUE	4.56989	1	1	1	5.47461e+06	3.71
High	A0A1N9M8A6	DCN1-like protein 5 OS=Mus musculus OX=10090 GN=Dcun1d5 PE=1 SV=1	FALSE	TRUE	6.66667	1	1	1	3.20005e+06	3.5
High	Q6ZWY7	Uncharacterized protein (Fragment) OS=Mus musculus OX=10090 GN=Pfdn5 PE=2 SV=1	FALSE	TRUE	9.375	1	1	1		2.57
High	Q3ULW8	Protein mono-ADP-ribosyltransferase PARP3 OS=Mus musculus OX=10090 GN=Parp3 PE=2 SV=1	FALSE	TRUE	2.81426	1	1	1		2.9
High	P47941	Crk-like protein OS=Mus musculus OX=10090 GN=Crkl PE=1 SV=2	FALSE	TRUE	3.9604	1	1	1	1.26074e+07	2.49
High	E9Q137	Testis-expressed gene 264 OS=Mus musculus OX=10090 GN=Tex264 PE=1 SV=1	FALSE	TRUE	3.55987	1	1	1	6.09877e+06	3.38
High	Q9QY23	Plakophilin-3 OS=Mus musculus OX=10090 GN=Pkp3 PE=1 SV=2	FALSE	TRUE	2.25847	1	1	1	6.56133e+06	4.15
High	Q4FK74	Atp5d protein OS=Mus musculus OX=10090 GN=Atp5d PE=1 SV=1	FALSE	TRUE	13.6905	2	2	2	4.24403e+06	1.96
High	Q9JMG7	Hepatoma-derived growth factor-related protein 3 OS=Mus musculus OX=10090 GN=Hdgfl3 PE=1 SV=2	FALSE	TRUE	7.42574	1	1	1	5.45918e+06	2.3
High	Q3U8B3	Replication protein A subunit OS=Mus musculus OX=10090 GN=Rpa1 PE=2 SV=1	FALSE	TRUE	3.88199	2	2	2	2.18111e+07	4.68
High	Q3TIT7	SH3 domain-containing protein OS=Mus musculus OX=10090 GN=Bcar1 PE=2 SV=1	FALSE	TRUE	1.373	1	1	1	6.53424e+06	2.3
High	P40240	CD9 antigen OS=Mus musculus OX=10090 GN=Cd9 PE=1 SV=2	FALSE	TRUE	5.30973	2	2	2	2.10564e+07	4.39
High	Q8CIG8	Protein arginine N-methyltransferase 5 OS=Mus musculus OX=10090 GN=Prmt5 PE=1 SV=3	FALSE	TRUE	4.70958	2	2	2	1.0791e+07	4.4
High	Q3U926	TYR_PHOSPHATASE_2 domain-containing protein OS=Mus musculus OX=10090 GN=Ptpmt1 PE=2 SV=1	FALSE	TRUE	4.98084	1	1	1	4.91967e+06	2.86
High	Q6DI95	Transportin 3 OS=Mus musculus OX=10090 GN=Tnpo3 PE=2 SV=1	FALSE	TRUE	1.40845	1	1	1	28026101	2.49
High	P56399	Ubiquitin carboxyl-terminal hydrolase 5 OS=Mus musculus OX=10090 GN=Usp5 PE=1 SV=1	FALSE	TRUE	1.98135	2	2	2	4.21547e+06	1.67
High	Q8BXC0	Prostacyclin synthase OS=Mus musculus OX=10090 GN=Ptgis PE=1 SV=1	FALSE	TRUE	4.91159	2	2	2	1.74574e+07	2.69
High	Q9CQX8	28S ribosomal protein S36, mitochondrial OS=Mus musculus OX=10090 GN=Mrps36 PE=1 SV=1	FALSE	TRUE	12.7451	1	2	1	2.98407e+07	2.08
High	P50543	Protein S100-A11 OS=Mus musculus OX=10090 GN=S100a11 PE=1 SV=1	FALSE	TRUE	10.2041	2	3	2	1.7837e+07	0
High	Q8BL66	Early endosome antigen 1 OS=Mus musculus OX=10090 GN=Eea1 PE=1 SV=2	FALSE	TRUE	0.992204	1	1	1	4.95585e+06	2.73
High	Q5SWR1	AP complex subunit beta OS=Mus musculus OX=10090 GN=Ap2b1 PE=2 SV=1	FALSE	TRUE	1.15668	1	1	1	8.90604e+06	2.39
High	P09528	Ferritin heavy chain OS=Mus musculus OX=10090 GN=Fth1 PE=1 SV=2	FALSE	TRUE	6.04396	1	1	1		2.14
High	Q3TZI7	Major prion protein OS=Mus musculus OX=10090 GN=Prnp PE=2 SV=1	FALSE	TRUE	4.72441	1	2	1	1.36328e+06	4.6
High	D3YZZ5	Transmembrane p24-trafficking protein 7 OS=Mus musculus OX=10090 GN=Tmed7 PE=1 SV=1	FALSE	TRUE	4.46429	1	1	1	12123657	2.15
High	Q8BVU5	ADP-ribose pyrophosphatase, mitochondrial OS=Mus musculus OX=10090 GN=Nudt9 PE=1 SV=1	FALSE	TRUE	3.71429	1	2	1	7.51848e+07	4.33
High	Q64514	Tripeptidyl-peptidase 2 OS=Mus musculus OX=10090 GN=Tpp2 PE=1 SV=3	FALSE	TRUE	1.74326	2	2	2	1.51219e+07	4.86
High	Q9QXS6	Drebrin OS=Mus musculus OX=10090 GN=Dbn1 PE=1 SV=4	FALSE	TRUE	2.54958	1	1	1	7.34601e+06	3.56
High	Q0VBK2	Keratin, type II cytoskeletal 80 OS=Mus musculus GN=Krt80 PE=2 SV=1	TRUE	TRUE	1.99115	1	1	1	1.8427e+07	2.16
High	Q9JMA2	Queuine tRNA-ribosyltransferase catalytic subunit 1 OS=Mus musculus OX=10090 GN=Qtrt1 PE=1 SV=2	FALSE	TRUE	3.22581	1	1	1	4.29969e+06	2.77
High	Q9CQT1	Methylthioribose-1-phosphate isomerase OS=Mus musculus OX=10090 GN=Mri1 PE=1 SV=1	FALSE	TRUE	6.23306	2	2	2		2.47
High	Q9DBG9	Tax1-binding protein 3 OS=Mus musculus OX=10090 GN=Tax1bp3 PE=1 SV=1	FALSE	TRUE	13.7097	1	1	1	1.7575e+07	2.11
High	P60060	Protein transport protein Sec61 subunit gamma OS=Mus musculus OX=10090 GN=Sec61g PE=3 SV=1	FALSE	TRUE	17.6471	1	1	1		2.95
High	Q9CQU0	Thioredoxin domain-containing protein 12 OS=Mus musculus OX=10090 GN=Txndc12 PE=1 SV=1	FALSE	TRUE	8.82353	1	2	1	3.71184e+07	4.74
High	Q9WUP7	Ubiquitin carboxyl-terminal hydrolase isozyme L5 OS=Mus musculus OX=10090 GN=Uchl5 PE=1 SV=2	FALSE	TRUE	3.34347	1	1	1	7.90382e+06	2.65
High	Q3TJI7	Tyrosine-protein kinase OS=Mus musculus OX=10090 GN=Yes1 PE=1 SV=1	FALSE	TRUE	3.14233	1	1	1	7.07618e+06	2.86
High	Q9D1H7	Golgi to ER traffic protein 4 homolog OS=Mus musculus OX=10090 GN=Get4 PE=1 SV=2	FALSE	TRUE	4.28135	1	1	1	5.40609e+06	2.98
High	Q99K28	ADP-ribosylation factor GTPase-activating protein 2 OS=Mus musculus OX=10090 GN=Arfgap2 PE=1 SV=1	FALSE	TRUE	1.92308	1	2	1	1.06783e+07	4.97
High	Q3TI61	26S proteasome non-ATPase regulatory subunit 2 OS=Mus musculus OX=10090 GN=Psmd2 PE=2 SV=1	FALSE	TRUE	1.10132	1	1	1	6.14594e+06	2.14
High	P61620	Protein transport protein Sec61 subunit alpha isoform 1 OS=Mus musculus OX=10090 GN=Sec61a1 PE=1 SV=2	FALSE	TRUE	6.30252	3	3	3	2.04334e+07	5.82
High	Q8BHK9	DNA excision repair protein ERCC-6-like OS=Mus musculus OX=10090 GN=Ercc6l PE=1 SV=1	FALSE	TRUE	1.20968	1	1	1		0
High	A0A1S6GWK0	Uncharacterized protein OS=Mus musculus OX=10090 GN=Stt3a PE=2 SV=1	FALSE	TRUE	1.59363	1	1	1	1.80169e+07	2.98
High	A0A5F8MPF2	Tensin-3 OS=Mus musculus OX=10090 GN=Tns3 PE=4 SV=1	FALSE	TRUE	2.20264	3	3	2	7194044	4.75
High	Q8CHW4	Translation initiation factor eIF-2B subunit epsilon OS=Mus musculus OX=10090 GN=Eif2b5 PE=1 SV=1	FALSE	TRUE	2.09205	1	2	1	1.03461e+07	2.46
High	Q5M8M3	Uncharacterized protein OS=Mus musculus OX=10090 GN=Trmt112 PE=2 SV=1	FALSE	TRUE	20.8	2	2	2	8.06423e+06	4.48
High	Q14525	Keratin, type I cuticular Ha3-II OS=Homo sapiens GN=KRT33B PE=2 SV=3	TRUE	FALSE	4.45545	2	9	1		13.45
High	Q3UA94	mRNA-capping enzyme OS=Mus musculus OX=10090 GN=Rngtt PE=1 SV=1	FALSE	TRUE	2.68007	1	1	1	3.72258e+06	2.08
High	Q3TXS7	26S proteasome non-ATPase regulatory subunit 1 OS=Mus musculus OX=10090 GN=Psmd1 PE=1 SV=1	FALSE	TRUE	2.3085	2	2	2	6.44125e+06	2.17
High	Q9WUR2	Enoyl-CoA delta isomerase 2, mitochondrial OS=Mus musculus OX=10090 GN=Eci2 PE=1 SV=2	FALSE	TRUE	3.06905	1	2	1	9.2993e+06	4.4
High	P70698	CTP synthase 1 OS=Mus musculus OX=10090 GN=Ctps1 PE=1 SV=2	FALSE	TRUE	1.69205	1	1	1	21746150	2.5
High	E9Q7L0	Oxoglutarate dehydrogenase-like OS=Mus musculus OX=10090 GN=Ogdhl PE=1 SV=1	FALSE	TRUE	0.874636	1	1	1	1.09028e+07	2.52
High	A0A4P3APB9	MK2 long isoform OS=Mus musculus OX=10090 GN=Mapkapk2 PE=2 SV=1	FALSE	TRUE	2.77136	1	1	1	4953893	2.43
High	A0A087WR52	Arf-GAP domain and FG repeat-containing protein 1 (Fragment) OS=Mus musculus OX=10090 GN=Agfg1 PE=1 SV=1	FALSE	TRUE	3.96552	1	1	1	5.6424e+06	3.41
High	P28301	Protein-lysine 6-oxidase OS=Mus musculus OX=10090 GN=Lox PE=1 SV=1	FALSE	TRUE	3.89294	1	1	1	1.3249e+07	2.9
High	Q9R0P4	Small acidic protein OS=Mus musculus OX=10090 GN=Smap PE=1 SV=1	FALSE	TRUE	8.83978	1	1	1		2.91
High	P16254	Signal recognition particle 14 kDa protein OS=Mus musculus OX=10090 GN=Srp14 PE=1 SV=1	FALSE	TRUE	9.09091	1	1	1	1.24067e+07	2.24
High	O43790	Keratin, type II cuticular Hb6 OS=Homo sapiens GN=KRT86 PE=1 SV=1	TRUE	FALSE	2.88066	1	1	1	7.24687e+06	2.76
High	Q62422	Osteoclast-stimulating factor 1 OS=Mus musculus OX=10090 GN=Ostf1 PE=1 SV=2	FALSE	TRUE	10.6977	2	2	2	800755	1.92
High	Q80WJ7	Protein LYRIC OS=Mus musculus OX=10090 GN=Mtdh PE=1 SV=1	FALSE	TRUE	4.14508	2	2	2	1.23386e+07	2.43
High	Q9CPT3	N-acylneuraminate-9-phosphatase OS=Mus musculus OX=10090 GN=Nanp PE=1 SV=1	FALSE	TRUE	4.83871	1	2	1	6.20502e+06	2.24
High	Q3U3X7	Uncharacterized protein OS=Mus musculus OX=10090 GN=Trim25 PE=2 SV=1	FALSE	TRUE	2.2082	1	1	1		3.73
High	Q5SX75	Prolyl 4-hydroxylase subunit alpha-2 OS=Mus musculus OX=10090 GN=P4ha2 PE=1 SV=1	FALSE	TRUE	4.46927	2	2	2	5.84257e+06	2.18
High	Q059T9	PRP4 pre-mRNA processing factor 4 homolog (Yeast) OS=Mus musculus OX=10090 GN=Prpf4 PE=1 SV=1	FALSE	TRUE	2.68714	1	1	1	3.51245e+06	2.58
High	Q4FZE6	40S ribosomal protein S7 OS=Mus musculus OX=10090 GN=Rps7 PE=2 SV=1	FALSE	TRUE	11.8557	3	3	3	1.67987e+07	1.65
High	Q811Q9	Choline-phosphate cytidylyltransferase B OS=Mus musculus OX=10090 GN=Pcyt1b PE=1 SV=2	FALSE	TRUE	3.25203	1	1	1	1.45536e+07	3.06
High	Q3UJQ2	HMG_CoA_synt_C domain-containing protein (Fragment) OS=Mus musculus OX=10090 GN=Hmgcs1 PE=2 SV=1	FALSE	TRUE	17.1429	1	1	1		3.65
High	Q62059	Versican core protein OS=Mus musculus OX=10090 GN=Vcan PE=1 SV=2	FALSE	TRUE	0.744713	2	2	2	6.7462e+06	4.76
High	E9Q634	Unconventional myosin-Ie OS=Mus musculus OX=10090 GN=Myo1e PE=1 SV=1	FALSE	TRUE	1.62602	2	2	2	5.66495e+06	4.21
High	Q8R464	Cell adhesion molecule 4 OS=Mus musculus OX=10090 GN=Cadm4 PE=1 SV=1	FALSE	TRUE	4.63918	1	1	1		3.32
High	Q9D7S9	Charged multivesicular body protein 5 OS=Mus musculus OX=10090 GN=Chmp5 PE=1 SV=1	FALSE	TRUE	7.30594	1	1	1	8.77765e+06	3.57
High	A2RRJ4	Exportin 5 OS=Mus musculus OX=10090 GN=Xpo5 PE=2 SV=1	FALSE	TRUE	0.913621	1	1	1		2.01
High	Q9DC23	DnaJ homolog subfamily C member 10 OS=Mus musculus OX=10090 GN=Dnajc10 PE=1 SV=2	FALSE	TRUE	1.38714	1	1	1	8014524	2.18
High	Q9CY97	RNA polymerase II subunit A C-terminal domain phosphatase SSU72 OS=Mus musculus OX=10090 GN=Ssu72 PE=1 SV=1	FALSE	TRUE	6.18557	1	1	1	200701090	1.99
High	Q4FJY5	Ltb4dh protein OS=Mus musculus OX=10090 GN=Ptgr1 PE=2 SV=1	FALSE	TRUE	3.64742	1	1	1		3.26
High	Q9DB73	NADH-cytochrome b5 reductase 1 OS=Mus musculus OX=10090 GN=Cyb5r1 PE=1 SV=1	FALSE	TRUE	3.60656	1	1	1		2.64
High	Q3TYX3	SET and MYND domain-containing protein 5 OS=Mus musculus OX=10090 GN=Smyd5 PE=1 SV=2	FALSE	TRUE	2.64423	1	1	1	4.36982e+06	1.78
High	Q3V1Z7	Uncharacterized protein OS=Mus musculus OX=10090 GN=Ddx1 PE=2 SV=1	FALSE	TRUE	3.64865	2	2	2	4.52397e+06	4.94
High	Q3U3G8	Serine hydrolase-like protein OS=Mus musculus OX=10090 GN=Serhl PE=1 SV=1	FALSE	TRUE	4.04984	1	1	1	2.71423e+06	2.82
High	Q3V2H3	Sorting nexin-12 OS=Mus musculus OX=10090 GN=Snx12 PE=1 SV=1	FALSE	TRUE	10.5882	2	2	1		1.75
High	B2RXQ8	WD repeat domain containing 82 OS=Mus musculus OX=10090 GN=Wdr82 PE=1 SV=1	FALSE	TRUE	8.6262	2	2	2	2.93802e+07	5.25
High	Q6GQT9	Nodal modulator 1 OS=Mus musculus OX=10090 GN=Nomo1 PE=1 SV=1	FALSE	TRUE	1.15321	1	1	1	5994663	1.86
High	Q9CWZ3	RNA-binding protein 8A OS=Mus musculus OX=10090 GN=Rbm8a PE=1 SV=4	FALSE	TRUE	10.9195	1	1	1	880702	2.19
High	O08919	Numb-like protein OS=Mus musculus OX=10090 GN=Numbl PE=1 SV=3	FALSE	TRUE	2.98013	1	1	1		3.03
High	P62746	Rho-related GTP-binding protein RhoB OS=Mus musculus OX=10090 GN=Rhob PE=1 SV=1	FALSE	TRUE	6.12245	1	1	1	2.20997e+06	2.82
High	A0A0R4J104	Disabled homolog 2 OS=Mus musculus OX=10090 GN=Dab2 PE=1 SV=1	FALSE	TRUE	1.56658	1	1	1		2.28
High	P43883	Perilipin-2 OS=Mus musculus OX=10090 GN=Plin2 PE=1 SV=2	FALSE	TRUE	7.29412	2	2	2		4.92
High	P62715	Serine/threonine-protein phosphatase 2A catalytic subunit beta isoform OS=Mus musculus OX=10090 GN=Ppp2cb PE=1 SV=1	FALSE	TRUE	2.589	1	1	1	2.10394e+06	2.32
High	P0DN34	NADH dehydrogenase [ubiquinone] 1 beta subcomplex subunit 1 OS=Mus musculus OX=10090 GN=Ndufb1 PE=1 SV=1	FALSE	TRUE	19.2982	1	2	1	5.90539e+06	5.12
High	Q3TE95	Uncharacterized protein OS=Mus musculus OX=10090 GN=Rcn2 PE=2 SV=1	FALSE	TRUE	3.38028	1	1	1		0
High	P47964	60S ribosomal protein L36 OS=Mus musculus OX=10090 GN=Rpl36 PE=1 SV=2	FALSE	TRUE	9.52381	1	1	1		2.36
High	Q543N3	Lasp1 protein OS=Mus musculus OX=10090 GN=Lasp1 PE=1 SV=1	FALSE	TRUE	4.94297	1	1	1		2.4
High	Q3U4S9	Coatomer subunit delta OS=Mus musculus OX=10090 GN=Arcn1 PE=2 SV=1	FALSE	TRUE	1.76125	1	1	1	5.67182e+06	2.31
High	Q8BH24	Transmembrane 9 superfamily member 4 OS=Mus musculus OX=10090 GN=Tm9sf4 PE=1 SV=1	FALSE	TRUE	1.39969	1	1	1	7.72005e+06	1.94
High	A0A0U1RQ57	CDP-diacylglycerol--inositol 3-phosphatidyltransferase OS=Mus musculus OX=10090 GN=Cdipt PE=1 SV=1	FALSE	TRUE	4.86726	1	1	1		0
High	Q60967	Bifunctional 3'-phosphoadenosine 5'-phosphosulfate synthase 1 OS=Mus musculus OX=10090 GN=Papss1 PE=1 SV=1	FALSE	TRUE	5.76923	2	2	2	3.09029e+06	4.94
High	Q7TSJ0	DNA (cytosine-5)-methyltransferase OS=Mus musculus OX=10090 GN=Dnmt1 PE=2 SV=1	FALSE	TRUE	0.860479	1	1	1	6.34617e+06	3.48
High	Q4VWZ5	Acyl-CoA-binding protein OS=Mus musculus OX=10090 GN=Dbi PE=1 SV=1	FALSE	TRUE	13.3333	1	2	1	23890413	4.69
High	Q9D708	Protein S100-A16 OS=Mus musculus OX=10090 GN=S100a16 PE=1 SV=1	FALSE	TRUE	9.67742	1	1	1	2.57779e+06	0
High	Q3USR5	Uncharacterized protein OS=Mus musculus OX=10090 GN=Fbxo2 PE=1 SV=1	FALSE	TRUE	5.05051	1	1	1	6.55334e+06	2.51
High	Q9DAU1	Protein canopy homolog 3 OS=Mus musculus OX=10090 GN=Cnpy3 PE=1 SV=1	FALSE	TRUE	3.62319	1	1	1		1.8
High	Q3U7E6	Uncharacterized protein OS=Mus musculus OX=10090 GN=Surf4 PE=2 SV=1	FALSE	TRUE	3.71747	1	2	1	1.07616e+07	4.41
High	Q8JZZ5	Phosphatidylinositol transfer protein beta isoform OS=Mus musculus OX=10090 GN=Pitpnb PE=1 SV=1	FALSE	TRUE	4.77941	1	1	1	4.11134e+06	2.37
High	Q61074	Protein phosphatase 1G OS=Mus musculus OX=10090 GN=Ppm1g PE=1 SV=3	FALSE	TRUE	7.01107	1	1	1		3.47
High	Q9EQH2	Endoplasmic reticulum aminopeptidase 1 OS=Mus musculus OX=10090 GN=Erap1 PE=1 SV=2	FALSE	TRUE	1.39785	1	1	1	5.52851e+06	3
High	Q3TN07	Uncharacterized protein OS=Mus musculus OX=10090 GN=Vps4b PE=1 SV=1	FALSE	TRUE	2.47748	1	1	1	6.771e+06	2.88
High	Q05BC3	Echinoderm microtubule-associated protein-like 1 OS=Mus musculus OX=10090 GN=Eml1 PE=1 SV=1	FALSE	TRUE	2.57985	2	2	2	5.44443e+06	2.1
High	A2ALF2	DnaJ (Hsp40) homolog, subfamily C, member 8 OS=Mus musculus OX=10090 GN=Dnajc8 PE=1 SV=1	FALSE	TRUE	6.71937	1	1	1	8.92069e+06	2.71
High	Q3UMF0	Cordon-bleu protein-like 1 OS=Mus musculus OX=10090 GN=Cobll1 PE=1 SV=2	FALSE	TRUE	1.49254	1	1	1	6.06463e+06	2.5
High	Q8N9S3	Activator of 90 kDa heat shock protein ATPase homolog 2 OS=Mus musculus OX=10090 GN=Ahsa2 PE=1 SV=2	FALSE	TRUE	8.45921	3	3	2	7.35427e+06	6.07
High	Q545C1	Uncharacterized protein OS=Mus musculus OX=10090 GN=Tial1 PE=1 SV=1	FALSE	TRUE	2.29592	1	1	1	2.22719e+06	1.77
High	Q9D1A2	Cytosolic non-specific dipeptidase OS=Mus musculus OX=10090 GN=Cndp2 PE=1 SV=1	FALSE	TRUE	2.52632	1	1	1	7.28568e+06	2.52
High	Q99LT0	Protein dpy-30 homolog OS=Mus musculus OX=10090 GN=Dpy30 PE=1 SV=1	FALSE	TRUE	9.09091	1	1	1		2.09
High	Q63932	Dual specificity mitogen-activated protein kinase kinase 2 OS=Mus musculus OX=10090 GN=Map2k2 PE=1 SV=2	FALSE	TRUE	2.99252	1	1	1		2.58
High	Q9JI48	Placenta-specific gene 8 protein OS=Mus musculus OX=10090 GN=Plac8 PE=1 SV=1	FALSE	TRUE	14.2857	1	1	1	22889767	2.64
High	Q3TAD4	Uncharacterized protein OS=Mus musculus OX=10090 GN=Uap1 PE=2 SV=1	FALSE	TRUE	2.49042	1	1	1		2.55
High	E9Q0S6	Tensin 1 OS=Mus musculus OX=10090 GN=Tns1 PE=1 SV=1	FALSE	TRUE	1.85381	2	2	1		2.45
High	A3KGU9	Spectrin alpha chain, non-erythrocytic 1 OS=Mus musculus OX=10090 GN=Sptan1 PE=1 SV=2	FALSE	TRUE	0.360288	1	1	1		2.14
High	Q570Z8	MKIAA4114 protein (Fragment) OS=Mus musculus OX=10090 GN=Picalm PE=2 SV=1	FALSE	TRUE	2.37389	2	2	2		3.38
High	P18608	Non-histone chromosomal protein HMG-14 OS=Mus musculus OX=10090 GN=Hmgn1 PE=1 SV=2	FALSE	TRUE	31.25	1	1	1	5.03973e+06	3.49
High	O70439	Syntaxin-7 OS=Mus musculus OX=10090 GN=Stx7 PE=1 SV=3	FALSE	TRUE	4.98084	1	1	1	7.03228e+06	2.4
High	P97348	Rho-related GTP-binding protein RhoD OS=Mus musculus OX=10090 GN=Rhod PE=1 SV=1	FALSE	TRUE	6.19048	1	1	1	1.58706e+06	2.83
High	Q3TKM9	Actin-related protein 2/3 complex subunit 5 OS=Mus musculus OX=10090 GN=Arpc5 PE=2 SV=1	FALSE	TRUE	7.94702	1	1	1	1.57641e+08	2.54
High	Q9D020	Cytosolic 5'-nucleotidase 3A OS=Mus musculus OX=10090 GN=Nt5c3a PE=1 SV=4	FALSE	TRUE	2.71903	1	1	1		2.38
High	A0A087WSP5	Signal transducer and activator of transcription OS=Mus musculus OX=10090 GN=Stat1 PE=1 SV=1	FALSE	TRUE	1.72185	1	1	1		3.05
High	Q9D1E6	Tubulin-folding cofactor B OS=Mus musculus OX=10090 GN=Tbcb PE=1 SV=2	FALSE	TRUE	4.09836	1	1	1	1.7371e+07	2.15
High	Q9D024	Coiled-coil domain-containing protein 47 OS=Mus musculus OX=10090 GN=Ccdc47 PE=1 SV=2	FALSE	TRUE	2.89855	1	1	1	8.35814e+06	2.82
High	Q9D1P4	Cysteine and histidine-rich domain-containing protein 1 OS=Mus musculus OX=10090 GN=Chordc1 PE=1 SV=1	FALSE	TRUE	4.22961	1	2	1	6021056	5.73
High	Q62267	Cornifin-B OS=Mus musculus OX=10090 GN=Sprr1b PE=2 SV=1	FALSE	TRUE	5.22876	1	1	1	6312034	2.18
High	P15261	Interferon gamma receptor 1 OS=Mus musculus OX=10090 GN=Ifngr1 PE=1 SV=3	FALSE	TRUE	1.88679	1	1	1	9.3398e+06	2.29
High	Q3UB06	Protein kinase domain-containing protein OS=Mus musculus OX=10090 GN=Srpk1 PE=1 SV=1	FALSE	TRUE	2.46914	1	1	1		2.97
High	O35129	Prohibitin-2 OS=Mus musculus OX=10090 GN=Phb2 PE=1 SV=1	FALSE	TRUE	6.68896	2	2	2	9.14562e+06	3.99
High	P61164	Alpha-centractin OS=Mus musculus OX=10090 GN=Actr1a PE=1 SV=1	FALSE	TRUE	7.44681	2	2	2		5.23
High	A0A0A6YVV8	Muscleblind-like protein 1 OS=Mus musculus OX=10090 GN=Mbnl1 PE=1 SV=1	FALSE	TRUE	2.32558	1	1	1	9.17462e+06	2.15
High	Q9QYA2	Mitochondrial import receptor subunit TOM40 homolog OS=Mus musculus OX=10090 GN=Tomm40 PE=1 SV=3	FALSE	TRUE	3.87812	1	1	1	1.17818e+07	2.52
High	Q922E6	FAST kinase domain-containing protein 2, mitochondrial OS=Mus musculus OX=10090 GN=Fastkd2 PE=2 SV=2	FALSE	TRUE	1.74165	1	1	1	1.76315e+06	0
High	P53702	Cytochrome c-type heme lyase OS=Mus musculus OX=10090 GN=Hccs PE=1 SV=2	FALSE	TRUE	4.77941	1	1	1	6770504	2.76
High	A0A1B0GRP7	Pyridoxal phosphate homeostasis protein (Fragment) OS=Mus musculus OX=10090 GN=Plpbp PE=1 SV=1	FALSE	TRUE	4.84848	1	1	1		2.59
High	P49443	Protein phosphatase 1A OS=Mus musculus OX=10090 GN=Ppm1a PE=1 SV=1	FALSE	TRUE	4.71204	1	1	1	1.39618e+06	3.04
High	O55125	Protein NipSnap homolog 1 OS=Mus musculus OX=10090 GN=Nipsnap1 PE=1 SV=1	FALSE	TRUE	3.16901	1	1	1	2.24685e+07	2.41
High	Q9D1M0	Protein SEC13 homolog OS=Mus musculus OX=10090 GN=Sec13 PE=1 SV=3	FALSE	TRUE	3.41615	1	1	1	1.92179e+06	2.46
High	Q3ULC7	Uncharacterized protein OS=Mus musculus OX=10090 GN=Ddx21 PE=2 SV=1	FALSE	TRUE	1.2926	1	1	1	2.24119e+07	0
High	A0A2I3BPG9	Ribosomal protein L36A, pseudogene 1 OS=Mus musculus OX=10090 GN=Rpl36a-ps1 PE=3 SV=1	FALSE	TRUE	16.9811	2	2	2	4.44912e+06	4.35
High	O35405	5'-3' exonuclease PLD3 OS=Mus musculus OX=10090 GN=Pld3 PE=1 SV=1	FALSE	TRUE	2.45902	1	1	1	1.49388e+07	2.34
High	P97300	Neuroplastin OS=Mus musculus OX=10090 GN=Nptn PE=1 SV=3	FALSE	TRUE	2.51889	1	1	1	4.74321e+07	1.87
High	Q08189	Protein-glutamine gamma-glutamyltransferase E OS=Mus musculus OX=10090 GN=Tgm3 PE=1 SV=2	FALSE	TRUE	1.8759	1	2	1	6.3346e+06	0
High	Q6A028	Switch-associated protein 70 OS=Mus musculus OX=10090 GN=Swap70 PE=1 SV=2	FALSE	TRUE	1.88034	1	1	1	8.60649e+06	0
High	Q3UCF0	Proteasome subunit alpha type OS=Mus musculus OX=10090 GN=Psma4 PE=2 SV=1	FALSE	TRUE	3.06513	1	1	1	4.08391e+06	1.8
High	E9QN99	Protein ABHD14B OS=Mus musculus OX=10090 GN=Abhd14b PE=1 SV=1	FALSE	TRUE	6.66667	1	1	1		3.6
High	A1Y9B2	Fas OS=Mus musculus OX=10090 GN=Fas PE=2 SV=1	FALSE	TRUE	2.75229	1	1	1		2.08
High	Q76I26	Methyltransferase hypoxia-inducible domain-containing 1 OS=Mus musculus OX=10090 GN=Methig1 PE=2 SV=1	FALSE	TRUE	4.54545	1	1	1	3.0451e+06	2.38
High	A0A1B0GSR7	Keratin, type I cytoskeletal 10 OS=Mus musculus OX=10090 GN=Krt10 PE=4 SV=1	FALSE	TRUE	10.3093	1	1	1	3.24887e+06	1.95
High	Q8CJ67	Double-stranded RNA-binding protein Staufen homolog 2 OS=Mus musculus OX=10090 GN=Stau2 PE=1 SV=1	FALSE	TRUE	5.61404	2	2	2		6.17
High	Q8QZY1	Eukaryotic translation initiation factor 3 subunit L OS=Mus musculus OX=10090 GN=Eif3l PE=1 SV=1	FALSE	TRUE	1.77305	1	1	1	7.65125e+06	0
High	Q66JR8	Ptms protein OS=Mus musculus OX=10090 GN=Ptms PE=2 SV=1	FALSE	TRUE	5.21327	1	1	1	1.30896e+07	2.16
High	Q32M04	Prps1l1 protein OS=Mus musculus OX=10090 GN=Prps1l1 PE=2 SV=1	FALSE	TRUE	9.0625	2	2	2		2.16
High	Q99N57	RAF proto-oncogene serine/threonine-protein kinase OS=Mus musculus OX=10090 GN=Raf1 PE=1 SV=2	FALSE	TRUE	2.62346	1	1	1	2.35703e+06	0
High	P59708	Splicing factor 3B subunit 6 OS=Mus musculus OX=10090 GN=Sf3b6 PE=1 SV=1	FALSE	TRUE	11.2	1	1	1	4.4361e+06	2.44
High	P62918	60S ribosomal protein L8 OS=Mus musculus OX=10090 GN=Rpl8 PE=1 SV=2	FALSE	TRUE	10.5058	2	2	2	7.07429e+06	4.66
High	Q8CAQ8	MICOS complex subunit Mic60 OS=Mus musculus OX=10090 GN=Immt PE=1 SV=1	FALSE	TRUE	2.24571	1	1	1		2.84
High	P05132	cAMP-dependent protein kinase catalytic subunit alpha OS=Mus musculus OX=10090 GN=Prkaca PE=1 SV=3	FALSE	TRUE	5.41311	2	3	2	4.9941e+07	4.61
High	Q62426	Cystatin-B OS=Mus musculus OX=10090 GN=Cstb PE=1 SV=1	FALSE	TRUE	11.2245	1	2	1	99097622	5.27
High	Q9CQR6	Serine/threonine-protein phosphatase 6 catalytic subunit OS=Mus musculus OX=10090 GN=Ppp6c PE=1 SV=1	FALSE	TRUE	3.93443	1	1	1	7.14608e+06	2.37
High	Q3UBW3	Uncharacterized protein OS=Mus musculus OX=10090 GN=Tomm22 PE=2 SV=1	FALSE	TRUE	15.493	1	1	1	6.68707e+06	3.08
High	P20108	Thioredoxin-dependent peroxide reductase, mitochondrial OS=Mus musculus OX=10090 GN=Prdx3 PE=1 SV=1	FALSE	TRUE	4.28016	1	1	1	100682906	2.27
High	P70122	Ribosome maturation protein SBDS OS=Mus musculus OX=10090 GN=Sbds PE=1 SV=4	FALSE	TRUE	3.6	1	1	1	29422082	1.7
High	Q3TIX9	U4/U6.U5 tri-snRNP-associated protein 2 OS=Mus musculus OX=10090 GN=Usp39 PE=1 SV=2	FALSE	TRUE	2.12766	1	1	1	8699879	2.01
High	Q8K215	LYR motif-containing protein 4 OS=Mus musculus OX=10090 GN=Lyrm4 PE=1 SV=1	FALSE	TRUE	13.1868	1	1	1		2.9
High	Q8VH51	RNA-binding protein 39 OS=Mus musculus OX=10090 GN=Rbm39 PE=1 SV=2	FALSE	TRUE	2.83019	1	1	1		2.29
High	P28667	MARCKS-related protein OS=Mus musculus OX=10090 GN=Marcksl1 PE=1 SV=2	FALSE	TRUE	14	2	2	2	1.60293e+06	3.74
High	Q4VAA2	Protein CDV3 OS=Mus musculus OX=10090 GN=Cdv3 PE=1 SV=2	FALSE	TRUE	2.84698	1	1	1	3.26701e+06	2.03
High	Q9D2Y4	Mixed lineage kinase domain-like protein OS=Mus musculus OX=10090 GN=Mlkl PE=1 SV=1	FALSE	TRUE	2.9661	1	1	1	2.40198e+06	2.5
High	Q91XU0	ATPase WRNIP1 OS=Mus musculus OX=10090 GN=Wrnip1 PE=1 SV=2	FALSE	TRUE	1.21212	1	1	1		1.65
High	Q62266	Cornifin-A OS=Mus musculus OX=10090 GN=Sprr1a PE=1 SV=1	FALSE	TRUE	16.6667	1	1	1	1.60902e+07	1.92
High	Q8CFV9	Riboflavin kinase OS=Mus musculus OX=10090 GN=Rfk PE=1 SV=2	FALSE	TRUE	5.80645	1	1	1	3327867	2.22
High	P70699	Lysosomal alpha-glucosidase OS=Mus musculus OX=10090 GN=Gaa PE=1 SV=2	FALSE	TRUE	2.51836	2	2	2	7.11759e+06	4.11
High	Q9CZ46	Uncharacterized protein OS=Mus musculus OX=10090 GN=Stmn2 PE=2 SV=1	FALSE	TRUE	4.78469	1	1	1	1.15181e+06	1.81
High	Q3TKJ1	Branched-chain-amino-acid aminotransferase OS=Mus musculus OX=10090 GN=Bcat1 PE=2 SV=1	FALSE	TRUE	2.20751	1	2	1	920579	1.84
High	Q8VCD3	Protein ERGIC-53-like OS=Mus musculus OX=10090 GN=Lman1l PE=2 SV=2	FALSE	TRUE	2.37624	2	2	1		2.26
High	A3KGJ7	Centrosome-associated protein CEP250 OS=Mus musculus OX=10090 GN=Cep250 PE=1 SV=2	FALSE	TRUE	0.698152	2	2	2	7.2566e+06	1.98
High	Q9WVJ2	26S proteasome non-ATPase regulatory subunit 13 OS=Mus musculus OX=10090 GN=Psmd13 PE=1 SV=1	FALSE	TRUE	3.45745	1	1	1	4.92734e+06	0
High	Q9WVE8	Protein kinase C and casein kinase substrate in neurons protein 2 OS=Mus musculus OX=10090 GN=Pacsin2 PE=1 SV=1	FALSE	TRUE	4.32099	2	2	2		2.37
High	Q3TV93	HORMA domain-containing protein OS=Mus musculus OX=10090 GN=Mad2l1 PE=2 SV=1	FALSE	TRUE	4.87805	1	1	1	5.46152e+07	1.92
High	Q8R3R9	Prefoldin 1 OS=Mus musculus OX=10090 GN=Pfdn1 PE=2 SV=1	FALSE	TRUE	9.01639	1	1	1	7110707	2.7
High	Q3TVM1	Uncharacterized protein OS=Mus musculus OX=10090 GN=Sf3a1 PE=2 SV=1	FALSE	TRUE	1.64349	1	1	1	3.19616e+06	2.92
High	Q9CSU0	Regulation of nuclear pre-mRNA domain-containing protein 1B OS=Mus musculus OX=10090 GN=Rprd1b PE=1 SV=2	FALSE	TRUE	4.90798	1	1	1	4.9618e+06	2.41
High	Q9D868	Peptidyl-prolyl cis-trans isomerase H OS=Mus musculus OX=10090 GN=Ppih PE=1 SV=1	FALSE	TRUE	4.78723	1	1	1	1.62448e+06	2.32
High	O88643	Serine/threonine-protein kinase PAK 1 OS=Mus musculus OX=10090 GN=Pak1 PE=1 SV=1	FALSE	TRUE	2.20183	1	1	1	1.52105e+07	2.78
High	Q99KC8	von Willebrand factor A domain-containing protein 5A OS=Mus musculus OX=10090 GN=Vwa5a PE=1 SV=2	FALSE	TRUE	3.02648	2	2	2	5.74734e+06	4.77
High	Q9D2V8	Major facilitator superfamily domain-containing protein 10 OS=Mus musculus OX=10090 GN=Mfsd10 PE=1 SV=1	FALSE	TRUE	2.41228	1	1	1	1.93937e+06	2.47
High	Q99K70	Ras-related GTP-binding protein C OS=Mus musculus OX=10090 GN=Rragc PE=1 SV=1	FALSE	TRUE	3.51759	1	1	1	9.37808e+06	2.8
High	Q3ZBS7	Uncharacterized protein OS=Bos taurus GN=VTN PE=2 SV=1	TRUE	FALSE	2.10084	1	1	1	3.22208e+07	2.17
High	Q8C570	mRNA export factor OS=Mus musculus OX=10090 GN=Rae1 PE=1 SV=1	FALSE	TRUE	3.53261	1	2	1	1.40159e+07	4.53
High	Q9D1D4	Transmembrane emp24 domain-containing protein 10 OS=Mus musculus OX=10090 GN=Tmed10 PE=1 SV=1	FALSE	TRUE	4.10959	1	1	1	4.02457e+07	0
High	Q99KI3	ER membrane protein complex subunit 3 OS=Mus musculus OX=10090 GN=Emc3 PE=1 SV=3	FALSE	TRUE	5.36398	1	1	1	3.94301e+06	2.63
High	Q3U9A8	SH3 domain-binding glutamic acid-rich-like protein OS=Mus musculus OX=10090 GN=Sh3bgrl PE=2 SV=1	FALSE	TRUE	8.77193	1	1	1	6.99243e+06	1.88
High	A0A1S6GWH4	SAM_MT_RSMB_NOP domain-containing protein OS=Mus musculus OX=10090 GN=Nsun2 PE=2 SV=1	FALSE	TRUE	1.53453	1	1	1	2.66078e+06	2.65
High	Q9Z2I0	Mitochondrial proton/calcium exchanger protein OS=Mus musculus OX=10090 GN=Letm1 PE=1 SV=1	FALSE	TRUE	1.76152	1	1	1	3.82031e+06	2.56
High	Q80XU3	Nuclear ubiquitous casein and cyclin-dependent kinase substrate 1 OS=Mus musculus OX=10090 GN=Nucks1 PE=1 SV=1	FALSE	TRUE	3.84615	1	1	1	1.22812e+06	1.81
High	Q7TSJ2	Microtubule-associated protein 6 OS=Mus musculus OX=10090 GN=Map6 PE=1 SV=2	FALSE	TRUE	2.98013	1	1	1	6721191	1.86
High	P02787	Serotransferrin OS=Homo sapiens GN=TF PE=1 SV=3	TRUE	FALSE	1.57593	1	1	1	4.43933e+06	2.7
High	P46460	Vesicle-fusing ATPase OS=Mus musculus OX=10090 GN=Nsf PE=1 SV=2	FALSE	TRUE	1.6129	1	1	1	5.04107e+06	3.18
High	Q9QXS1	Plectin OS=Mus musculus OX=10090 GN=Plec PE=1 SV=3	FALSE	TRUE	0.383713	1	1	1	2.73319e+07	1.71
High	P41241	Tyrosine-protein kinase CSK OS=Mus musculus OX=10090 GN=Csk PE=1 SV=2	FALSE	TRUE	3.11111	1	1	1		2.92
High	Q8QZY9	Splicing factor 3B subunit 4 OS=Mus musculus OX=10090 GN=Sf3b4 PE=1 SV=1	FALSE	TRUE	3.30189	1	1	1	16327797	2.46
High	Q3UIQ2	Uncharacterized protein OS=Mus musculus OX=10090 GN=Ndufs1 PE=2 SV=1	FALSE	TRUE	1.10041	1	1	1	6.28491e+06	2.3
High	O54819	Tissue factor pathway inhibitor OS=Mus musculus OX=10090 GN=Tfpi PE=2 SV=1	FALSE	TRUE	3.26797	1	1	1	1.62947e+07	2.32
High	P70398	Probable ubiquitin carboxyl-terminal hydrolase FAF-X OS=Mus musculus OX=10090 GN=Usp9x PE=1 SV=2	FALSE	TRUE	0.547089	2	2	2		1.6
High	D3YVW2	Golgi integral membrane protein 4 OS=Mus musculus OX=10090 GN=Golim4 PE=1 SV=1	FALSE	TRUE	2.04978	1	1	1	3.95516e+06	2.6
High	Q8R2Q0	Tripartite motif-containing protein 29 OS=Mus musculus OX=10090 GN=Trim29 PE=1 SV=1	FALSE	TRUE	1.36286	1	1	1		2.14
High	Q80YQ1	Thrombospondin-1 OS=Mus musculus OX=10090 GN=Thbs1 PE=1 SV=1	FALSE	TRUE	1.28096	1	1	1		2.21
High	Q3TVV7	OMPdecase domain-containing protein OS=Mus musculus OX=10090 GN=Umps PE=2 SV=1	FALSE	TRUE	3.1185	1	1	1	4.05198e+06	2.86
High	Q8BNP8	Uncharacterized protein OS=Mus musculus OX=10090 GN=Ptges PE=2 SV=1	FALSE	TRUE	6.36943	1	1	1	1.49601e+07	1.76
High	A0A1D5RMM8	Paxillin OS=Mus musculus OX=10090 GN=Pxn PE=1 SV=2	FALSE	TRUE	1.69492	1	1	1	1.75485e+07	2.84
High	Q99M08	Uncharacterized protein C4orf3 homolog OS=Mus musculus OX=10090 PE=1 SV=1	FALSE	TRUE	21.5385	1	1	1	18897029	3.29
High	E9QJS1	Tyrosine-protein kinase OS=Mus musculus OX=10090 GN=Tyk2 PE=1 SV=1	FALSE	TRUE	1.07705	2	2	2	3.52079e+06	1.8
High	Q8BT06	Tetraspanin OS=Mus musculus OX=10090 GN=Cd63 PE=2 SV=1	FALSE	TRUE	2.81124	1	1	1	8.08038e+06	0
High	Q8K2Q7	BRO1 domain-containing protein BROX OS=Mus musculus OX=10090 GN=Brox PE=1 SV=1	FALSE	TRUE	2.6764	1	1	1	1.11739e+07	2.44
High	O88545	COP9 signalosome complex subunit 6 OS=Mus musculus OX=10090 GN=Cops6 PE=1 SV=1	FALSE	TRUE	4.62963	1	1	1	2.87866e+06	0
High	P70195	Proteasome subunit beta type-7 OS=Mus musculus OX=10090 GN=Psmb7 PE=1 SV=1	FALSE	TRUE	3.2491	1	1	1	961472	1.84
High	A0A1D5RMI8	Alstrom syndrome protein 1 homolog OS=Mus musculus OX=10090 GN=Alms1 PE=1 SV=1	FALSE	TRUE	0.591398	2	2	2	2.04086e+07	2.59
High	Q9D0I9	Arginine--tRNA ligase, cytoplasmic OS=Mus musculus OX=10090 GN=Rars PE=1 SV=2	FALSE	TRUE	1.66667	1	1	1		2.19
High	E9Q912	RAP1, GTP-GDP dissociation stimulator 1 OS=Mus musculus OX=10090 GN=Rap1gds1 PE=1 SV=1	FALSE	TRUE	1.97694	1	1	1		1.8
High	Q3UHD6	Sorting nexin-27 OS=Mus musculus OX=10090 GN=Snx27 PE=1 SV=2	FALSE	TRUE	2.22635	1	1	1		2.52
High	Q0VE46	Myadm protein OS=Mus musculus OX=10090 GN=Myadm PE=1 SV=1	FALSE	TRUE	5.3125	1	1	1	2.46079e+06	2.54
High	Q80VJ2	Steroid receptor RNA activator 1 OS=Mus musculus OX=10090 GN=Sra1 PE=1 SV=3	FALSE	TRUE	4.31034	1	1	1		2.03
High	P00493	Hypoxanthine-guanine phosphoribosyltransferase OS=Mus musculus OX=10090 GN=Hprt1 PE=1 SV=3	FALSE	TRUE	5.9633	1	1	1	7.17182e+06	2.23
High	Q3TI98	B5 domain-containing protein OS=Mus musculus OX=10090 GN=Farsb PE=2 SV=1	FALSE	TRUE	4.0747	2	2	2	7.84997e+06	4.41
High	Q8BGL3	Sulfotransferase OS=Mus musculus OX=10090 GN=Sult2a8 PE=1 SV=1	FALSE	TRUE	4.25532	1	1	1		2.29
High	Q8R0E2	39S ribosomal protein L33, mitochondrial OS=Mus musculus OX=10090 GN=Mrpl33 PE=1 SV=1	FALSE	TRUE	13.0841	1	1	1	3.62599e+06	0
High	P15116	Cadherin-2 OS=Mus musculus OX=10090 GN=Cdh2 PE=1 SV=2	FALSE	TRUE	1.65563	1	1	1		2.56
High	Q8C0E2	Vacuolar protein sorting-associated protein 26B OS=Mus musculus OX=10090 GN=Vps26b PE=1 SV=1	FALSE	TRUE	2.97619	1	1	1		2.2
High	Q8CCZ4	Lipoyl synthase, mitochondrial OS=Mus musculus OX=10090 GN=Lias PE=2 SV=1	FALSE	TRUE	3.21716	1	1	1	1.85086e+06	2.08
High	Q60866	Phosphotriesterase-related protein OS=Mus musculus OX=10090 GN=Pter PE=1 SV=1	FALSE	TRUE	3.72493	1	1	1	5.8193e+06	2.44
High	Q3UM45	Protein phosphatase 1 regulatory subunit 7 OS=Mus musculus OX=10090 GN=Ppp1r7 PE=1 SV=2	FALSE	TRUE	2.49307	1	1	1		2.19
High	E9Q9H0	Disks large homolog 1 OS=Mus musculus OX=10090 GN=Dlg1 PE=1 SV=1	FALSE	TRUE	2.85088	2	2	2	2.0427e+06	1.71
High	Q569Z5	Probable ATP-dependent RNA helicase DDX46 OS=Mus musculus OX=10090 GN=Ddx46 PE=1 SV=2	FALSE	TRUE	1.25969	1	1	1	5.21064e+06	2.04
High	Q3TS44	Proteasome subunit alpha type OS=Mus musculus OX=10090 GN=Psma1 PE=1 SV=1	FALSE	TRUE	3.04183	1	1	1	3.10614e+06	0
High	P11087	Collagen alpha-1(I) chain OS=Mus musculus OX=10090 GN=Col1a1 PE=1 SV=4	FALSE	TRUE	0.619408	1	1	1	2.99547e+06	2.45
High	Q8BTK5	SET and MYND domain-containing protein 4 OS=Mus musculus OX=10090 GN=Smyd4 PE=2 SV=2	FALSE	TRUE	1.62703	1	2	1	3.71767e+08	5.07
High	Q544T5	DHFR domain-containing protein OS=Mus musculus OX=10090 GN=Dhfr PE=1 SV=1	FALSE	TRUE	5.34759	1	1	1	5.9545e+06	2.28
High	Q921W0	Charged multivesicular body protein 1a OS=Mus musculus OX=10090 GN=Chmp1a PE=1 SV=1	FALSE	TRUE	4.08163	1	1	1	447063	1.93
High	I1E4X1	Syntaxin 5A OS=Mus musculus OX=10090 GN=Stx5a PE=1 SV=1	FALSE	TRUE	3.61991	1	1	1	2.08861e+06	2.95
High	Q3TV85	Uncharacterized protein (Fragment) OS=Mus musculus OX=10090 PE=2 SV=1	FALSE	TRUE	2.24719	1	1	1	3.36083e+07	2.36
High	Q6ZWM4	U6 snRNA-associated Sm-like protein LSm8 OS=Mus musculus OX=10090 GN=Lsm8 PE=1 SV=3	FALSE	TRUE	10.4167	1	1	1	925207	0
High	A2AJQ0	[Pyruvate dehydrogenase [acetyl-transferring]]-phosphatase 1, mitochondrial OS=Mus musculus OX=10090 GN=Pdp1 PE=1 SV=2	FALSE	TRUE	2.51256	1	1	1		2.46
High	P51859	Hepatoma-derived growth factor OS=Mus musculus OX=10090 GN=Hdgf PE=1 SV=2	FALSE	TRUE	8.01688	2	3	2	2.31525e+07	5.24
High	P34955	Alpha-1-antiproteinase OS=Bos taurus GN=SERPINA1 PE=1 SV=1	TRUE	FALSE	5.28846	2	2	2	2.83655e+06	2.41
High	Q9D1M7	Peptidyl-prolyl cis-trans isomerase FKBP11 OS=Mus musculus OX=10090 GN=Fkbp11 PE=1 SV=1	FALSE	TRUE	10.4478	2	2	2	7.84432e+06	2.95
High	G3X961	Kelch domain-containing protein 4 OS=Mus musculus OX=10090 GN=Klhdc4 PE=4 SV=1	FALSE	TRUE	3.93836	2	2	2		4.61
High	A2AFQ0	E3 ubiquitin-protein ligase HUWE1 OS=Mus musculus OX=10090 GN=Huwe1 PE=1 SV=1	FALSE	TRUE	0.753769	1	1	1		3.31
High	A0A1S6GWH8	Nuclear cap-binding protein subunit 2 OS=Mus musculus OX=10090 GN=Ncbp2 PE=2 SV=1	FALSE	TRUE	5.64103	1	1	1	7.69684e+06	2.24
High	A2I7N0	Serpin A3-4 OS=Bos taurus GN=SERPINA3-4 PE=3 SV=1	TRUE	FALSE	4.13625	2	2	2	1.23095e+07	4.17
High	Q3ULU3	Branched-chain-amino-acid aminotransferase OS=Mus musculus OX=10090 GN=Bcat2 PE=1 SV=1	FALSE	TRUE	3.05344	1	1	1		2.94
High	Q91V01	Lysophospholipid acyltransferase 5 OS=Mus musculus OX=10090 GN=Lpcat3 PE=1 SV=1	FALSE	TRUE	1.84805	1	1	1	2.60512e+06	1.72
High	Q3UE92	Xaa-Pro aminopeptidase 1 OS=Mus musculus OX=10090 GN=Xpnpep1 PE=1 SV=1	FALSE	TRUE	2.7027	2	2	2	1.15222e+07	3.57
High	Q8R0F6	Integrin-linked kinase-associated serine/threonine phosphatase 2C OS=Mus musculus OX=10090 GN=Ilkap PE=1 SV=1	FALSE	TRUE	3.06122	1	1	1	9.98592e+06	2.19
High	A0A1S6GWJ3	Thymidine kinase OS=Mus musculus OX=10090 GN=Tk1 PE=2 SV=1	FALSE	TRUE	3.90625	1	1	1		2.13
High	P35505	Fumarylacetoacetase OS=Mus musculus OX=10090 GN=Fah PE=1 SV=2	FALSE	TRUE	2.86396	1	1	1		2.12
High	Q02819	Nucleobindin-1 OS=Mus musculus OX=10090 GN=Nucb1 PE=1 SV=2	FALSE	TRUE	3.48584	1	1	1	8182010	2.7
High	Q00915	Retinol-binding protein 1 OS=Mus musculus OX=10090 GN=Rbp1 PE=1 SV=2	FALSE	TRUE	6.66667	1	1	1	2.98525e+07	0
High	P02802	Metallothionein-1 OS=Mus musculus OX=10090 GN=Mt1 PE=1 SV=1	FALSE	TRUE	19.6721	1	1	1	397970	1.61
High	Q3THC1	Uncharacterized protein OS=Mus musculus OX=10090 GN=Psmd9 PE=2 SV=1	FALSE	TRUE	6.30631	1	1	1	4.58291e+06	2.28
High	P48453	Serine/threonine-protein phosphatase 2B catalytic subunit beta isoform OS=Mus musculus OX=10090 GN=Ppp3cb PE=1 SV=2	FALSE	TRUE	2.28571	1	1	1		2.43
High	Q6ZPJ0	Testis-expressed protein 2 OS=Mus musculus OX=10090 GN=Tex2 PE=1 SV=2	FALSE	TRUE	0.975177	1	1	1		2.29
High	Q91Z92	Beta-1,3-galactosyltransferase 6 OS=Mus musculus OX=10090 GN=B3galt6 PE=2 SV=1	FALSE	TRUE	4	1	1	1		2.84
High	Q5EBP9	Tripartite motif-containing 28 OS=Mus musculus OX=10090 GN=Trim28 PE=2 SV=1	FALSE	TRUE	2.39808	1	1	1	2.28464e+06	3.54
High	Q3U3B9	BSD domain-containing protein OS=Mus musculus OX=10090 GN=Syap1 PE=2 SV=1	FALSE	TRUE	3.83562	1	1	1	2.41283e+06	3.12
High	Q78XF5	Oligosaccharyltransferase complex subunit OSTC OS=Mus musculus OX=10090 GN=Ostc PE=1 SV=1	FALSE	TRUE	8.05369	1	1	1		2.43
High	O88712	C-terminal-binding protein 1 OS=Mus musculus OX=10090 GN=Ctbp1 PE=1 SV=2	FALSE	TRUE	2.49433	1	1	1	3.00761e+06	3.39
High	E9PV87	Protein TALPID3 OS=Mus musculus OX=10090 GN=Talpid3 PE=1 SV=1	FALSE	TRUE	0.921053	1	1	1		3.12
High	Q3UIA5	CULLIN_2 domain-containing protein OS=Mus musculus OX=10090 GN=Cul1 PE=2 SV=1	FALSE	TRUE	2.06186	1	1	1		3.61
High	E9Q7K1	Guanylate kinase OS=Mus musculus OX=10090 GN=Guk1 PE=1 SV=1	FALSE	TRUE	8.21256	1	1	1		2.46
High	H7BX59	tRNA pseudouridine synthase A OS=Mus musculus OX=10090 GN=Pus1 PE=1 SV=1	FALSE	TRUE	2.49433	1	1	1	980741	2.23
High	Q8BTU1	Cilia- and flagella-associated protein 20 OS=Mus musculus OX=10090 GN=Cfap20 PE=1 SV=1	FALSE	TRUE	5.69948	1	1	1		2.23
High	Q91W64	Cytochrome P450 2C70 OS=Mus musculus OX=10090 GN=Cyp2c70 PE=1 SV=2	FALSE	TRUE	3.27198	1	1	1		2.52
High	Q9D727	Uncharacterized protein C6orf226 homolog OS=Mus musculus OX=10090 PE=1 SV=1	FALSE	TRUE	14.0351	1	1	1		2.89
High	P99026	Proteasome subunit beta type-4 OS=Mus musculus OX=10090 GN=Psmb4 PE=1 SV=1	FALSE	TRUE	7.19697	2	2	2	3.43449e+06	1.65
High	Q8VDM6	Heterogeneous nuclear ribonucleoprotein U-like protein 1 OS=Mus musculus OX=10090 GN=Hnrnpul1 PE=1 SV=1	FALSE	TRUE	1.6298	1	1	1	13820892	2.52
High	Q3TXM9	Uncharacterized protein OS=Mus musculus OX=10090 GN=Srsf9 PE=2 SV=1	FALSE	TRUE	4.95495	1	1	1	19567434	2.61
High	P18155	Bifunctional methylenetetrahydrofolate dehydrogenase/cyclohydrolase, mitochondrial OS=Mus musculus OX=10090 GN=Mthfd2 PE=1 SV=1	FALSE	TRUE	3.14286	1	1	1	1.27091e+07	2.82
High	P02798	Metallothionein-2 OS=Mus musculus OX=10090 GN=Mt2 PE=1 SV=2	TRUE	TRUE	19.6721	1	1	1	179066	0
High	B2RUG4	GLI-Kruppel family member GLI3 OS=Mus musculus OX=10090 GN=Gli3 PE=2 SV=1	FALSE	TRUE	1.26342	1	1	1	988891	2.36
Medium	Q7M6Z4	Kinesin-like protein KIF27 OS=Mus musculus OX=10090 GN=Kif27 PE=1 SV=1	FALSE	TRUE	0.502152	1	1	1	6.62491e+06	1.94
Medium	G5E8L7	Glycosylphosphatidylinositol-anchored molecule-like 2 OS=Mus musculus OX=10090 GN=Gml2 PE=4 SV=1	FALSE	TRUE	8.52273	1	2	1	2.54665e+06	2.09
Medium	Q76LV0	Glutathione peroxidase OS=Mus musculus OX=10090 GN=Gpx4 PE=1 SV=2	FALSE	TRUE	7.90514	2	2	2	245114	4.29
Medium	Q0GNC1	Inverted formin-2 OS=Mus musculus OX=10090 GN=Inf2 PE=1 SV=1	FALSE	TRUE	0.942655	1	1	1	2.4314e+06	2.31
Medium	Q9R0Y5	Adenylate kinase isoenzyme 1 OS=Mus musculus OX=10090 GN=Ak1 PE=1 SV=1	FALSE	TRUE	6.18557	1	1	1	5.70659e+07	2.63
Medium	Q8C5K0	Uncharacterized protein OS=Mus musculus OX=10090 GN=Lamp2 PE=2 SV=1	FALSE	TRUE	2.16346	1	1	1	2.56597e+07	2.34
Medium	F8VQC1	Signal recognition particle subunit SRP72 OS=Mus musculus OX=10090 GN=Srp72 PE=1 SV=1	FALSE	TRUE	1.34128	1	1	1		2.24
Medium	Q8BR92	Paralemmin-2 OS=Mus musculus OX=10090 GN=Palm2 PE=1 SV=1	FALSE	TRUE	3.98936	1	1	1	5.52024e+06	0
Medium	Q8CGA0	Protein phosphatase 1F OS=Mus musculus OX=10090 GN=Ppm1f PE=1 SV=1	FALSE	TRUE	1.99115	1	1	1	6.13207e+06	1.89
Medium	P06801	NADP-dependent malic enzyme OS=Mus musculus OX=10090 GN=Me1 PE=1 SV=2	FALSE	TRUE	3.14685	2	2	2	1.90521e+07	3.75
Medium	Q8C208	Zinc finger protein Eos OS=Mus musculus OX=10090 GN=Ikzf4 PE=1 SV=2	FALSE	TRUE	3.07167	1	1	1	125187372	2.89
Medium	E9QAA1	Zinc finger protein 758 OS=Mus musculus OX=10090 GN=Zfp758 PE=4 SV=1	FALSE	TRUE	2.5729	1	1	1	3.69088e+07	2.55
Medium	Q99M71	Mammalian ependymin-related protein 1 OS=Mus musculus OX=10090 GN=Epdr1 PE=1 SV=1	FALSE	TRUE	5.80357	1	1	1	414490	2.01
Medium	D3Z4Z0	Transcriptional adapter OS=Mus musculus OX=10090 GN=Tada2b PE=4 SV=1	FALSE	TRUE	1.66667	1	1	1	1.46362e+08	2.18
Medium	Q3USZ2	Upstream-binding factor 1-like protein 1 OS=Mus musculus OX=10090 GN=Ubtfl1 PE=1 SV=1	FALSE	TRUE	1.52284	1	1	1		0
Medium	O35623	BET1 homolog OS=Mus musculus OX=10090 GN=Bet1 PE=1 SV=1	FALSE	TRUE	9.32203	1	1	1	1.73578e+07	2.65
Medium	Q542M2	Coatomer subunit zeta OS=Mus musculus OX=10090 GN=Copz1 PE=1 SV=1	FALSE	TRUE	5.64972	1	1	1	4.04797e+06	0
Medium	Q3UTB8	GrpE protein homolog OS=Mus musculus OX=10090 GN=Grpel1 PE=2 SV=1	FALSE	TRUE	4.14747	1	1	1	1.10301e+07	1.73
Medium	G5E881	Phosphatidate cytidylyltransferase, mitochondrial OS=Mus musculus OX=10090 GN=Tamm41 PE=1 SV=1	FALSE	TRUE	2.67062	1	1	1	3.29389e+06	2.32
Medium	A2A9Q2	Nardilysin, N-arginine dibasic convertase, NRD convertase 1 OS=Mus musculus OX=10090 GN=Nrd1 PE=1 SV=1	FALSE	TRUE	2.03417	2	2	2	5.87777e+06	5.52
Medium	J3QPG5	Prosaposin OS=Mus musculus OX=10090 GN=Psap PE=1 SV=1	FALSE	TRUE	1.79533	1	1	1	5.90816e+06	2.46
Medium	O08599	Syntaxin-binding protein 1 OS=Mus musculus OX=10090 GN=Stxbp1 PE=1 SV=2	FALSE	TRUE	2.18855	1	1	1	3.07448e+06	2.07
Medium	Q8BNU0	Armadillo repeat-containing protein 6 OS=Mus musculus OX=10090 GN=Armc6 PE=1 SV=1	FALSE	TRUE	2.35043	1	1	1		2.59
Medium	Q00262	Syntaxin-2 OS=Mus musculus OX=10090 GN=Stx2 PE=1 SV=1	FALSE	TRUE	4.49827	1	1	1	1.38897e+06	2.48
Medium	Q9JIH2	Nuclear pore complex protein Nup50 OS=Mus musculus OX=10090 GN=Nup50 PE=1 SV=3	FALSE	TRUE	2.7897	1	1	1	2.81932e+06	2.37
Medium	P45878	Peptidyl-prolyl cis-trans isomerase FKBP2 OS=Mus musculus OX=10090 GN=Fkbp2 PE=1 SV=1	FALSE	TRUE	8.57143	1	1	1	1.06935e+07	2.31
Medium	Q8BGI5	Peroxisome assembly protein 26 OS=Mus musculus OX=10090 GN=Pex26 PE=1 SV=2	FALSE	TRUE	4.2623	1	1	1	5.877e+06	2.07
Medium	Q80UU9	Membrane-associated progesterone receptor component 2 OS=Mus musculus OX=10090 GN=Pgrmc2 PE=1 SV=2	FALSE	TRUE	4.14747	1	1	1	15698690	2.05
Medium	E9PVW0	Major urinary protein 8 OS=Mus musculus OX=10090 GN=Mup8 PE=3 SV=2	FALSE	TRUE	3.82979	1	1	1	2.95159e+06	0
Medium	A0A0R4J187	X-ray repair cross-complementing protein 6 OS=Mus musculus OX=10090 GN=Xrcc6 PE=1 SV=1	FALSE	TRUE	2.30263	1	1	1		2.42
Medium	O08906	Reverse transcriptase (Fragment) OS=Mus musculus OX=10090 PE=4 SV=1	FALSE	TRUE	0.692308	1	1	1		2.29
Medium	O09012	Peroxisomal targeting signal 1 receptor OS=Mus musculus OX=10090 GN=Pex5 PE=1 SV=2	FALSE	TRUE	2.19092	1	1	1		2.26
Medium	O08788	Dynactin subunit 1 OS=Mus musculus OX=10090 GN=Dctn1 PE=1 SV=3	FALSE	TRUE	0.936768	1	1	1		2.84
Medium	B2RQQ7	CDC42 binding protein kinase beta OS=Mus musculus OX=10090 GN=Cdc42bpb PE=2 SV=1	FALSE	TRUE	0.758903	1	1	1	142809	2.46
Medium	E9PW43	Protein transport protein Sec61 subunit beta OS=Mus musculus OX=10090 GN=Gm10320 PE=3 SV=1	FALSE	TRUE	8.84956	1	1	1	2.19334e+07	1.99
Medium	Q9EP72	ER membrane protein complex subunit 7 OS=Mus musculus OX=10090 GN=Emc7 PE=1 SV=1	FALSE	TRUE	5.39419	1	1	1		2.89
Medium	Q91VX2	Ubiquitin-associated protein 2 OS=Mus musculus OX=10090 GN=Ubap2 PE=1 SV=1	FALSE	TRUE	1.32509	1	1	1	1.27982e+06	2.83
Medium	Q99KE1	NAD-dependent malic enzyme, mitochondrial OS=Mus musculus OX=10090 GN=Me2 PE=1 SV=1	FALSE	TRUE	3.73514	2	2	2	1.52057e+07	4.11
Medium	Q3TZU7	Sorting nexin OS=Mus musculus OX=10090 GN=Snx9 PE=2 SV=1	FALSE	TRUE	2.35294	1	1	1	9294558	2.67
Medium	P97825	Jupiter microtubule associated homolog 1 OS=Mus musculus OX=10090 GN=Jpt1 PE=1 SV=3	FALSE	TRUE	9.74026	1	1	1	1.38217e+07	2.25
Medium	Q8BM72	Heat shock 70 kDa protein 13 OS=Mus musculus OX=10090 GN=Hspa13 PE=1 SV=1	FALSE	TRUE	2.33546	1	1	1		3.06
Medium	Q8BMD8	Calcium-binding mitochondrial carrier protein SCaMC-1 OS=Mus musculus OX=10090 GN=Slc25a24 PE=1 SV=1	FALSE	TRUE	1.89474	1	1	1	1.71676e+07	2.57
Medium	A0A0G2JGL0	Ubiquitin-conjugating enzyme E2 D3 OS=Mus musculus OX=10090 GN=Ube2d3 PE=1 SV=1	FALSE	TRUE	7.43243	1	1	1	1.22452e+08	2.45
Medium	Q9JJK2	LanC-like protein 2 OS=Mus musculus OX=10090 GN=Lancl2 PE=1 SV=1	FALSE	TRUE	2.44444	1	1	1	1.29314e+07	2.63
Medium	A0A2I3BRA0	Acyl-CoA-binding domain-containing protein 7 OS=Mus musculus OX=10090 GN=Acbd7 PE=4 SV=1	FALSE	TRUE	16.8539	1	2	1	12405907877	5.16
Medium	Q3TSQ1	Sodium/potassium-transporting ATPase subunit beta OS=Mus musculus OX=10090 GN=Atp1b1 PE=2 SV=1	FALSE	TRUE	3.61842	1	1	1		0
Medium	Q5XK33	Succinate dehydrogenase complex, subunit C, integral membrane protein OS=Mus musculus OX=10090 GN=Sdhc PE=2 SV=1	FALSE	TRUE	10.0592	1	1	1	6.64127e+06	2.65
Medium	Q545G0	Proteasome subunit beta OS=Mus musculus OX=10090 GN=Psmb3 PE=1 SV=1	FALSE	TRUE	3.41463	1	1	1	1.39838e+07	1.78
Medium	P12815	Programmed cell death protein 6 OS=Mus musculus OX=10090 GN=Pdcd6 PE=1 SV=2	FALSE	TRUE	4.71204	1	1	1		2.66
Medium	Q8BXZ1	Protein disulfide-isomerase TMX3 OS=Mus musculus OX=10090 GN=Tmx3 PE=1 SV=2	FALSE	TRUE	1.75439	1	1	1	3.02878e+06	1.89
Medium	Q91ZK0	Transcription factor AP-2-delta OS=Mus musculus OX=10090 GN=Tfap2d PE=1 SV=1	FALSE	TRUE	1.54867	1	1	1	9.74686e+06	0
Medium	Q3URF5	Uncharacterized protein OS=Mus musculus OX=10090 GN=Mrpl19 PE=2 SV=1	FALSE	TRUE	3.40136	1	1	1	1.08596e+06	2.73
Medium	O88413	Tubby-related protein 3 OS=Mus musculus OX=10090 GN=Tulp3 PE=1 SV=1	FALSE	TRUE	2.6087	1	1	1	2.35909e+06	2.48
Medium	Q91VW3	SH3 domain-binding glutamic acid-rich-like protein 3 OS=Mus musculus OX=10090 GN=Sh3bgrl3 PE=1 SV=1	FALSE	TRUE	10.7527	1	1	1	2.36585e+06	0
Medium	Q6R891	Neurabin-2 OS=Mus musculus OX=10090 GN=Ppp1r9b PE=1 SV=1	FALSE	TRUE	1.83599	1	1	1	2.28601e+06	2.81
Medium	Q3U8M3	Uncharacterized protein OS=Mus musculus OX=10090 GN=Rpl37a PE=2 SV=1	FALSE	TRUE	12.3711	1	1	1		2.28
Medium	Q9D735	Telomerase RNA component interacting RNase OS=Mus musculus OX=10090 GN=Trir PE=1 SV=1	FALSE	TRUE	14.4509	1	2	1	3.85084e+06	5.92
Medium	G5E8D6	EGF-containing fibulin-like extracellular matrix protein 2 OS=Mus musculus OX=10090 GN=Efemp2 PE=4 SV=1	FALSE	TRUE	2.81385	1	1	1		2.27
Medium	Q80X85	28S ribosomal protein S7, mitochondrial OS=Mus musculus OX=10090 GN=Mrps7 PE=1 SV=1	FALSE	TRUE	4.95868	1	1	1	488866	0
Medium	H3BJZ7	Protein unc-13 homolog A OS=Mus musculus OX=10090 GN=Unc13a PE=1 SV=1	FALSE	TRUE	0.519931	1	1	1	393417	1.93
Medium	P70444	BH3-interacting domain death agonist OS=Mus musculus OX=10090 GN=Bid PE=1 SV=2	FALSE	TRUE	8.71795	1	1	1	4.41414e+06	2.3
Medium	Q80UL3	Galactokinase 1 OS=Mus musculus OX=10090 GN=Galk1 PE=2 SV=1	FALSE	TRUE	2.29592	1	1	1		1.89
Medium	E9PX89	BolA-like protein 3 OS=Mus musculus OX=10090 GN=Bola3 PE=1 SV=1	FALSE	TRUE	12.5	1	1	1	3.56316e+06	3.14
Medium	Q01730	Ras suppressor protein 1 OS=Mus musculus OX=10090 GN=Rsu1 PE=1 SV=3	FALSE	TRUE	4.33213	1	2	1	3.38552e+06	4.66
Medium	E0CYV0	Protein-L-isoaspartate O-methyltransferase OS=Mus musculus OX=10090 GN=Pcmt1 PE=1 SV=1	FALSE	TRUE	3.84615	1	1	1	2.58184e+07	2.32
Medium	E9PV66	Myosin XVIIIb OS=Mus musculus OX=10090 GN=Myo18b PE=1 SV=1	FALSE	TRUE	0.537428	1	1	1		2.57
Medium	Q3TIT6	J domain-containing protein OS=Mus musculus OX=10090 GN=Dnajb1 PE=2 SV=1	FALSE	TRUE	3.23529	1	1	1	1.32235e+07	2.34
Medium	E9PX52	Arf-GAP with SH3 domain, ANK repeat and PH domain-containing protein 2 OS=Mus musculus OX=10090 GN=Asap2 PE=1 SV=1	FALSE	TRUE	0.8	1	4	1	1.26815e+07	7.96
Medium	Q8R1S9	Sodium-coupled neutral amino acid transporter 4 OS=Mus musculus OX=10090 GN=Slc38a4 PE=1 SV=1	FALSE	TRUE	1.27971	1	1	1	3.78143e+07	1.86
Medium	Q6PET3	Signal peptidase complex catalytic subunit SEC11 (Fragment) OS=Mus musculus OX=10090 GN=Sec11a PE=2 SV=1	FALSE	TRUE	2.90909	1	1	1		1.74
Medium	Q91V98	Endosialin OS=Mus musculus OX=10090 GN=Cd248 PE=1 SV=1	FALSE	TRUE	1.30719	1	1	1	3.71538e+06	1.99
Medium	Q9D115	Zinc finger protein 706 OS=Mus musculus OX=10090 GN=Znf706 PE=1 SV=1	FALSE	TRUE	14.4737	1	1	1	5.88755e+07	2.16
Medium	Q9ES70	Serine/threonine-protein kinase Nek6 OS=Mus musculus OX=10090 GN=Nek6 PE=1 SV=1	FALSE	TRUE	2.55591	1	1	1		1.62
Medium	D3Z7P3	Glutaminase kidney isoform, mitochondrial OS=Mus musculus OX=10090 GN=Gls PE=1 SV=1	FALSE	TRUE	2.37389	1	1	1	1.5027e+06	2.62
Medium	Q6KAU4	Multivesicular body subunit 12B OS=Mus musculus OX=10090 GN=Mvb12b PE=1 SV=2	FALSE	TRUE	7.88644	1	1	1		0
Medium	F8WI88	PEST proteolytic signal-containing nuclear protein OS=Mus musculus OX=10090 GN=Pcnp PE=1 SV=1	FALSE	TRUE	5.82011	1	1	1	5.69878e+06	2.9
Medium	Q3UPA1	Uncharacterized protein OS=Mus musculus OX=10090 GN=Gna11 PE=1 SV=1	FALSE	TRUE	3.62117	1	1	1	5.71215e+06	2.11
Medium	A2AKX3	Probable helicase senataxin OS=Mus musculus OX=10090 GN=Setx PE=1 SV=1	FALSE	TRUE	0.26455	1	1	1	2.08383e+06	0
Medium	Q571F3	MFLJ00061 protein (Fragment) OS=Mus musculus OX=10090 GN=Necap1 PE=2 SV=1	FALSE	TRUE	3.21429	1	1	1	6.02305e+06	0
Medium	O88737	Protein bassoon OS=Mus musculus OX=10090 GN=Bsn PE=1 SV=4	FALSE	TRUE	0.177575	1	1	1	2.67557e+07	0
Medium	Q921F4	Heterogeneous nuclear ribonucleoprotein L-like OS=Mus musculus OX=10090 GN=Hnrnpll PE=1 SV=3	FALSE	TRUE	1.52284	1	1	1	7807744	2.48
Medium	Q3TLE2	Uncharacterized protein OS=Mus musculus OX=10090 GN=Fermt2 PE=1 SV=1	FALSE	TRUE	1.61765	1	1	1		2.89
Medium	Q1XID4	Renin/prorenin receptor OS=Mus musculus OX=10090 GN=Atp6ap2 PE=1 SV=2	FALSE	TRUE	3.71429	1	1	1		2.52
Medium	A0A0R4J293	Protein-glutamine gamma-glutamyltransferase K OS=Mus musculus OX=10090 GN=Tgm1 PE=1 SV=1	FALSE	TRUE	1.10429	1	1	1		1.8
Medium	F6ZGI7	Molybdopterin synthase sulfur carrier subunit OS=Mus musculus OX=10090 GN=Mocs2 PE=1 SV=1	FALSE	TRUE	12.5	1	1	1	2.51443e+06	2.79
Medium	G5E8S0	PHD finger protein 14 OS=Mus musculus OX=10090 GN=Phf14 PE=1 SV=1	FALSE	TRUE	0.794552	1	1	1		1.79
Medium	Q8BH79	Anoctamin-10 OS=Mus musculus OX=10090 GN=Ano10 PE=1 SV=1	FALSE	TRUE	2.27618	1	1	1		2.31
Medium	Q3TM31	TIR domain-containing protein OS=Mus musculus OX=10090 GN=Tlr3 PE=2 SV=1	FALSE	TRUE	1.10497	1	1	1	5393845	1.65
Medium	G3UWC2	N-acetylated-alpha-linked acidic dipeptidase 2 OS=Mus musculus OX=10090 GN=Naalad2 PE=1 SV=1	FALSE	TRUE	1.15681	1	1	1	4.29522e+06	2.24
Medium	Q9Z2G2	Squamous cell carcinoma antigen 2 OS=Mus musculus OX=10090 GN=Scca2 PE=3 SV=1	FALSE	TRUE	1.80412	1	2	1	2.05324e+08	1.82
Medium	F8VPV0	Pericentrin OS=Mus musculus OX=10090 GN=Pcnt PE=1 SV=1	FALSE	TRUE	0.342936	1	1	1	6580706	1.8
Medium	Q3TU66	Uncharacterized protein OS=Mus musculus OX=10090 PE=2 SV=1	FALSE	TRUE	5.6	1	1	1		0
Medium	Q5EP41	ETS related protein 71 OS=Mus musculus OX=10090 GN=Etv2 PE=3 SV=1	FALSE	TRUE	2.23464	1	1	1		0
Medium	Q8VE11	Myotubularin-related protein 6 OS=Mus musculus OX=10090 GN=Mtmr6 PE=1 SV=1	FALSE	TRUE	2.26904	1	1	1	4.68267e+06	3.1
Medium	A0A1S6GWI0	Uncharacterized protein OS=Mus musculus OX=10090 GN=Ndufa8 PE=2 SV=1	FALSE	TRUE	8.25243	1	1	1	3.18609e+06	2.23
Medium	P62192	26S proteasome regulatory subunit 4 OS=Mus musculus OX=10090 GN=Psmc1 PE=1 SV=1	FALSE	TRUE	2.72727	1	2	1		4.95
Medium	Q3THG2	PCI domain-containing protein OS=Mus musculus OX=10090 GN=Psmd11 PE=2 SV=1	FALSE	TRUE	2.8436	1	1	1	8.21767e+06	2.22
Medium	Q07797	Galectin-3-binding protein OS=Mus musculus OX=10090 GN=Lgals3bp PE=1 SV=1	FALSE	TRUE	1.38648	1	1	1		2.05
Medium	P15252	Rubber elongation factor protein OS=Hevea brasiliensis PE=1 SV=2	TRUE	FALSE	7.97101	1	1	1	3.23445e+06	2.24
Medium	Q9EST4	Proteasome assembly chaperone 2 OS=Mus musculus OX=10090 GN=Psmg2 PE=1 SV=1	FALSE	TRUE	2.65152	1	1	1	28147534	1.65
Medium	F6X1P1	RIKEN cDNA 2310061I04 gene (Fragment) OS=Mus musculus OX=10090 GN=2310061I04Rik PE=1 SV=1	FALSE	TRUE	6.13208	1	1	1		2.18
Medium	Q3UWR6	RRM domain-containing protein OS=Mus musculus OX=10090 GN=Msi2 PE=2 SV=1	FALSE	TRUE	2.89855	1	1	1		0
Medium	Q921I6	SH3 domain-binding protein 4 OS=Mus musculus OX=10090 GN=Sh3bp4 PE=1 SV=1	FALSE	TRUE	1.4553	1	1	1	844865	2.11
Medium	P97363	Serine palmitoyltransferase 2 OS=Mus musculus OX=10090 GN=Sptlc2 PE=1 SV=2	FALSE	TRUE	1.96429	1	1	1		2.64
Medium	Q9R0X4	Acyl-coenzyme A thioesterase 9, mitochondrial OS=Mus musculus OX=10090 GN=Acot9 PE=1 SV=1	FALSE	TRUE	4.7836	2	2	2	1.34415e+06	3.73
Medium	Q80U95	Ubiquitin-protein ligase E3C OS=Mus musculus OX=10090 GN=Ube3c PE=1 SV=2	FALSE	TRUE	1.10803	1	1	1		2.35
Medium	A0A140LHG8	Signal peptidase complex subunit 2 OS=Mus musculus OX=10090 GN=Spcs2 PE=1 SV=1	FALSE	TRUE	3.07692	1	1	1	4.74187e+06	0
Medium	A0A0A6YVS2	Calcium load-activated calcium channel (Fragment) OS=Mus musculus OX=10090 GN=Tmco1 PE=1 SV=1	FALSE	TRUE	4	1	1	1	3.66845e+06	1.67
Medium	A0A0B4J1F9	Trichohyalin OS=Mus musculus OX=10090 GN=Tchh PE=4 SV=1	FALSE	TRUE	0.375235	1	1	1	3.57422e+06	0
Medium	Q6NXM6	Gene model 1008, (NCBI) OS=Mus musculus OX=10090 GN=Zfp663 PE=2 SV=1	FALSE	TRUE	3.20122	1	1	1		2.72
Medium	P63089	Pleiotrophin OS=Mus musculus OX=10090 GN=Ptn PE=1 SV=1	FALSE	TRUE	5.95238	1	1	1	1.04756e+06	1.81
Medium	Q9D7J4	Cytochrome c oxidase assembly protein COX20, mitochondrial OS=Mus musculus OX=10090 GN=Cox20 PE=1 SV=1	FALSE	TRUE	10.2564	1	1	1		2.66
Medium	P62257	Ubiquitin-conjugating enzyme E2 H OS=Mus musculus OX=10090 GN=Ube2h PE=1 SV=1	FALSE	TRUE	5.46448	1	1	1		0
Medium	Q9D823	60S ribosomal protein L37 OS=Mus musculus OX=10090 GN=Rpl37 PE=3 SV=3	FALSE	TRUE	6.18557	1	1	1	62592.9	0
Medium	P35550	rRNA 2'-O-methyltransferase fibrillarin OS=Mus musculus OX=10090 GN=Fbl PE=1 SV=2	FALSE	TRUE	4.28135	1	1	1	163600	2.15
Medium	O35640	Annexin A8 OS=Mus musculus OX=10090 GN=Anxa8 PE=1 SV=2	FALSE	TRUE	4.89297	1	1	1		3.2
Medium	Q91VE0	Long-chain fatty acid transport protein 4 OS=Mus musculus OX=10090 GN=Slc27a4 PE=1 SV=1	FALSE	TRUE	2.33281	1	1	1		2.8
Medium	A0A338P6F7	Roundabout homolog 1 (Fragment) OS=Mus musculus OX=10090 GN=Robo1 PE=1 SV=1	FALSE	TRUE	0.616523	1	1	1	6.78169e+06	0
Medium	P06684	Complement C5 OS=Mus musculus OX=10090 GN=C5 PE=1 SV=2	FALSE	TRUE	0.595238	1	1	1	1.88143e+07	2.17
Medium	D3YXK0	Janus kinase and microtubule-interacting protein 2 OS=Mus musculus OX=10090 GN=Jakmip2 PE=1 SV=2	FALSE	TRUE	1.09756	1	1	1	2.76e+06	0
Medium	Q3TLY7	Uncharacterized protein OS=Mus musculus OX=10090 GN=Mrps11 PE=2 SV=1	FALSE	TRUE	8.90052	1	1	1		2.6
Medium	Q9CQ48	NudC domain-containing protein 2 OS=Mus musculus OX=10090 GN=Nudcd2 PE=1 SV=1	FALSE	TRUE	7.00637	1	1	1	368324	2.15
Medium	Q8CIW5	Twinkle protein, mitochondrial OS=Mus musculus OX=10090 GN=Twnk PE=2 SV=1	FALSE	TRUE	0.875912	1	1	1	930987	0
Medium	H3BJQ7	Peroxiredoxin OS=Mus musculus OX=10090 GN=Prdx5 PE=1 SV=1	FALSE	TRUE	5.16432	1	1	1	1.12691e+08	2.25
Medium	E9Q6A6	Collagen alpha-6(VI) chain OS=Mus musculus OX=10090 GN=Col6a6 PE=1 SV=2	FALSE	TRUE	0.750552	1	1	1		2.64
Medium	E9PYS0	Vomeronasal 2, receptor 108 OS=Mus musculus OX=10090 GN=Vmn2r108 PE=3 SV=2	FALSE	TRUE	1.75439	1	2	1		5.57
Medium	A0A0R4J0F6	Cyclin-G-associated kinase OS=Mus musculus OX=10090 GN=Gak PE=1 SV=1	FALSE	TRUE	0.996169	1	1	1		2.49
Medium	Q28065	C4b-binding protein alpha chain OS=Bos taurus GN=C4BPA PE=2 SV=1	TRUE	FALSE	1.96721	1	1	1		0
Medium	A0A1B0GR17	Iroquois-class homeodomain protein IRX-5 OS=Mus musculus OX=10090 GN=Irx5 PE=4 SV=1	FALSE	TRUE	1.74419	1	1	1	9.40667e+07	0
Medium	A0A286YDB8	Elongator complex protein 3 OS=Mus musculus OX=10090 GN=Elp3 PE=1 SV=1	FALSE	TRUE	1.80832	1	1	1	4.65459e+06	2.06
Medium	Q3TAL2	Secretory carrier-associated membrane protein OS=Mus musculus OX=10090 GN=Scamp2 PE=1 SV=1	FALSE	TRUE	3.64742	1	1	1	720697	0
Medium	Q8C5N3	Pre-mRNA-splicing factor CWC22 homolog OS=Mus musculus OX=10090 GN=Cwc22 PE=1 SV=1	FALSE	TRUE	0.991189	1	2	1		0
Medium	Q9D0K3	AAA domain-containing protein OS=Mus musculus OX=10090 GN=Rfc2 PE=2 SV=1	FALSE	TRUE	2.29226	1	1	1	3.22804e+06	1.62
Medium	Q5SX53	Uncharacterized protein OS=Mus musculus OX=10090 GN=Slc25a11 PE=1 SV=1	FALSE	TRUE	4.4586	1	1	1	1.77855e+06	2.53
Medium	A0A1Y7VJB9	Dual-specificity protein phosphatase CDC14B OS=Mus musculus OX=10090 GN=Cdc14b PE=1 SV=1	FALSE	TRUE	1.21951	1	1	1	1.5452e+06	0
Medium	Q7TNB8	Protein strawberry notch homolog 2 OS=Mus musculus OX=10090 GN=Sbno2 PE=1 SV=1	FALSE	TRUE	1.18606	1	1	1		2.77
Medium	Q9D3P1	Trichohyalin-like protein 1 OS=Mus musculus OX=10090 GN=Tchhl1 PE=2 SV=2	FALSE	TRUE	2.50784	1	1	1		2.58
Medium	Q8BH30	Importin subunit alpha OS=Mus musculus OX=10090 GN=Kpna6 PE=1 SV=1	FALSE	TRUE	1.86567	1	1	1	6.25499e+06	2.34
Medium	Q9CZB4	MICOS complex subunit OS=Mus musculus OX=10090 GN=Apool PE=2 SV=1	FALSE	TRUE	4.51128	1	1	1		3.03
Medium	Q9Z1G4	V-type proton ATPase 116 kDa subunit a isoform 1 OS=Mus musculus OX=10090 GN=Atp6v0a1 PE=1 SV=3	FALSE	TRUE	1.54946	1	1	1		2.36
Medium	Q91YJ2	Sorting nexin-4 OS=Mus musculus OX=10090 GN=Snx4 PE=1 SV=1	FALSE	TRUE	2.22222	1	1	1	1.19531e+08	2.33
Medium	Q99KV1	DnaJ homolog subfamily B member 11 OS=Mus musculus OX=10090 GN=Dnajb11 PE=1 SV=1	FALSE	TRUE	5.30726	1	1	1	7.02184e+06	3.53
Medium	E9PUD2	Dynamin-1-like protein OS=Mus musculus OX=10090 GN=Dnm1l PE=1 SV=1	FALSE	TRUE	3.23034	1	1	1		3.52
Medium	Q6P6L4	Zinc finger and BTB domain containing 12 OS=Mus musculus OX=10090 GN=Zbtb12 PE=2 SV=1	FALSE	TRUE	2.61438	1	1	1		2.36
Medium	Q3TSC7	Uncharacterized protein (Fragment) OS=Mus musculus OX=10090 GN=Vsx2 PE=2 SV=1	FALSE	TRUE	61.5385	1	1	1	1.02003e+07	1.97
Medium	Q02780	Nuclear factor 1 A-type OS=Mus musculus OX=10090 GN=Nfia PE=1 SV=1	FALSE	TRUE	1.50376	1	1	1		2.24
Medium	Q8R5A6	TBC1 domain family member 22A OS=Mus musculus OX=10090 GN=Tbc1d22a PE=1 SV=3	FALSE	TRUE	4.26357	1	1	1	2.48383e+06	3.1
Medium	Q3U3K9	Ancient ubiquitous protein 1 OS=Mus musculus OX=10090 GN=Aup1 PE=1 SV=1	FALSE	TRUE	2.73349	1	1	1	1.76363e+07	2.45
Medium	Q3TDK1	Uncharacterized protein OS=Mus musculus OX=10090 GN=Pigc PE=2 SV=1	FALSE	TRUE	3.7037	1	1	1	1.30712e+06	2.7
Medium	Q99JP4	Anaphase-promoting complex subunit CDC26 OS=Mus musculus OX=10090 GN=Cdc26 PE=1 SV=1	FALSE	TRUE	28.2353	1	1	1	4.28645e+06	2.92
Medium	A0A0R4J079	Golgi resident protein GCP60 OS=Mus musculus OX=10090 GN=Acbd3 PE=1 SV=1	FALSE	TRUE	3.04762	1	1	1	3.44385e+06	1.99
Medium	Q9DA79	Dipeptidase 3 OS=Mus musculus OX=10090 GN=Dpep3 PE=1 SV=1	FALSE	TRUE	1.41988	1	1	1		2.01
Medium	A0A1B0GR18	MOB kinase activator 2 OS=Mus musculus OX=10090 GN=Mob2 PE=1 SV=1	FALSE	TRUE	4.13534	1	1	1	1.04891e+07	2.83
Medium	Q61576	Peptidyl-prolyl cis-trans isomerase FKBP10 OS=Mus musculus OX=10090 GN=Fkbp10 PE=1 SV=2	FALSE	TRUE	1.54905	1	1	1		2.2
Medium	Q14AX9	Mannose receptor, C type 2 OS=Mus musculus OX=10090 GN=Mrc2 PE=2 SV=1	FALSE	TRUE	1.0142	1	1	1	20530085	2.33
Medium	Q5DTS2	MKIAA4026 protein (Fragment) OS=Mus musculus OX=10090 GN=Stk10 PE=2 SV=1	FALSE	TRUE	1.11562	1	1	1	6.01067e+07	2.25
Medium	G3X9Q6	La-related protein 4 OS=Mus musculus OX=10090 GN=Larp4 PE=1 SV=1	FALSE	TRUE	3.05981	1	1	1	6.78465e+06	2.29
Medium	Q8VCK5	Kelch-like protein 20 OS=Mus musculus OX=10090 GN=Klhl20 PE=2 SV=2	FALSE	TRUE	2.31788	1	1	1		2.46
Medium	P12787	Cytochrome c oxidase subunit 5A, mitochondrial OS=Mus musculus OX=10090 GN=Cox5a PE=1 SV=2	FALSE	TRUE	6.16438	1	1	1		1.72
Medium	D3Z3Y7	Pleckstrin homology domain-containing family A member 4 OS=Mus musculus OX=10090 GN=Plekha4 PE=4 SV=1	FALSE	TRUE	0.898588	1	1	1	9.33803e+06	0
Medium	V9GWU7	Serine/threonine-protein kinase WNK3 OS=Mus musculus OX=10090 GN=Wnk3 PE=1 SV=1	FALSE	TRUE	1.06205	1	1	1		2.11
Medium	Q3TXJ7	Uncharacterized protein OS=Mus musculus OX=10090 GN=Bax PE=2 SV=1	FALSE	TRUE	5.72917	1	1	1		1.87
Medium	Q9D706	RNA polymerase II-associated protein 3 OS=Mus musculus OX=10090 GN=Rpap3 PE=1 SV=1	FALSE	TRUE	2.12121	1	1	1	2.28321e+06	2.81
Medium	Q99KR3	Endoribonuclease LACTB2 OS=Mus musculus OX=10090 GN=Lactb2 PE=1 SV=1	FALSE	TRUE	6.25	1	1	1	4.98946e+06	0
Medium	A0A0G2JDL0	tRNA:m(4)X modification enzyme TRM13 homolog OS=Mus musculus OX=10090 GN=Trmt13 PE=1 SV=1	FALSE	TRUE	8.27586	1	1	1	1.36211e+07	3.09
Medium	ENSEMBL:ENSBTAP00000037665	(Bos taurus) similar to Pregnancy zone protein, partial [OS=Bos taurus]	TRUE	FALSE	1.55709	1	1	1	1.05342e+08	1.93
Medium	Q99LB2	Dehydrogenase/reductase SDR family member 4 OS=Mus musculus OX=10090 GN=Dhrs4 PE=1 SV=3	FALSE	TRUE	3.58423	1	1	1	2.62432e+06	2.3
Medium	Q9QY96	Extracellular calcium-sensing receptor OS=Mus musculus OX=10090 GN=Casr PE=1 SV=2	FALSE	TRUE	0.741427	1	1	1	6.18387e+06	2.2
Medium	O88307	Sortilin-related receptor OS=Mus musculus OX=10090 GN=Sorl1 PE=1 SV=3	FALSE	TRUE	0.767494	1	1	1		2.46
Medium	Q3TJG7	Protein kinase domain-containing protein OS=Mus musculus OX=10090 GN=Map2k3 PE=2 SV=1	FALSE	TRUE	2.30548	1	1	1	428663	0
Medium	P62748	Hippocalcin-like protein 1 OS=Mus musculus OX=10090 GN=Hpcal1 PE=1 SV=2	FALSE	TRUE	7.25389	1	1	1		2.38
Medium	Q60676	Serine/threonine-protein phosphatase 5 OS=Mus musculus OX=10090 GN=Ppp5c PE=1 SV=3	FALSE	TRUE	2.60521	1	1	1	5525914	2.03
Medium	Q3UHA3	Spatacsin OS=Mus musculus OX=10090 GN=Spg11 PE=1 SV=3	FALSE	TRUE	0.493827	1	1	1		2.1
Medium	B2RSW8	Pericentriolar material 1 OS=Mus musculus OX=10090 GN=Pcm1 PE=2 SV=1	FALSE	TRUE	0.641975	1	1	1		2.38
Medium	Q8R570	Synaptosomal-associated protein 47 OS=Mus musculus OX=10090 GN=Snap47 PE=1 SV=1	FALSE	TRUE	2.90557	1	1	1		2.36
Medium	Q6P4T2	U5 small nuclear ribonucleoprotein 200 kDa helicase OS=Mus musculus OX=10090 GN=Snrnp200 PE=1 SV=1	FALSE	TRUE	0.327715	1	1	1		0
Medium	Q8CAK1	Putative transferase CAF17 homolog, mitochondrial OS=Mus musculus OX=10090 GN=Iba57 PE=1 SV=1	FALSE	TRUE	3.63128	1	1	1		2.81
Medium	E9PYN9	Amine oxidase OS=Mus musculus OX=10090 GN=Aoc1 PE=1 SV=1	FALSE	TRUE	3.04233	1	1	1	11821041	2.2
Medium	P56380	Bis(5'-nucleosyl)-tetraphosphatase [asymmetrical] OS=Mus musculus OX=10090 GN=Nudt2 PE=1 SV=3	FALSE	TRUE	10.2041	1	1	1	5.79003e+06	2.12
Medium	Q8R526	Polycystic kidney disease protein 1-like 1 OS=Mus musculus OX=10090 GN=Pkd1l1 PE=1 SV=2	FALSE	TRUE	0.8413	1	1	1		2.81
Medium	P39098	Mannosyl-oligosaccharide 1,2-alpha-mannosidase IB OS=Mus musculus OX=10090 GN=Man1a2 PE=1 SV=1	FALSE	TRUE	1.40406	1	1	1		1.93
Medium	Q8VE19	GATOR complex protein MIOS OS=Mus musculus OX=10090 GN=Mios PE=1 SV=2	FALSE	TRUE	0.8	1	1	1		1.66
Medium	Q9D104	Signal recognition particle 19 kDa protein OS=Mus musculus OX=10090 GN=Srp19 PE=1 SV=1	FALSE	TRUE	10.4167	1	1	1		1.91
Medium	Q7TS68	tRNA (cytosine(72)-C(5))-methyltransferase NSUN6 OS=Mus musculus OX=10090 GN=Nsun6 PE=2 SV=2	FALSE	TRUE	2.10084	1	1	1	1.72297e+07	0
Medium	Q6ZQ84	MKIAA0617 protein (Fragment) OS=Mus musculus OX=10090 GN=mKIAA0617 PE=3 SV=1	FALSE	TRUE	0.883838	1	1	1		0
Medium	A8ASF5	Acyltransferase OS=Mus musculus OX=10090 GN=Cpt1a PE=2 SV=1	FALSE	TRUE	0.776197	1	1	1	745519	0
Medium	Q8CCP0	Nuclear export mediator factor Nemf OS=Mus musculus OX=10090 GN=Nemf PE=1 SV=2	FALSE	TRUE	0.657895	1	1	1	1.07447e+07	1.88
Medium	A0A1S6GWG3	RPN13_C domain-containing protein OS=Mus musculus OX=10090 GN=Adrm1 PE=2 SV=1	FALSE	TRUE	1.2766	1	1	1		1.62
Medium	Q8R0H9	ADP-ribosylation factor-binding protein GGA1 OS=Mus musculus OX=10090 GN=Gga1 PE=1 SV=1	FALSE	TRUE	1.41732	1	1	1		2.26
Medium	Q6XBJ3	One cut domain family member 2 OS=Mus musculus OX=10090 GN=Onecut2 PE=2 SV=2	FALSE	TRUE	2.17822	1	1	1	6.15353e+06	2.42
Medium	A0A140LHZ9	Neuregulin 1 OS=Mus musculus OX=10090 GN=Nrg1 PE=1 SV=2	FALSE	TRUE	1.04895	1	1	1		1.92
Medium	Q91VJ4	Serine/threonine-protein kinase 38 OS=Mus musculus OX=10090 GN=Stk38 PE=1 SV=1	FALSE	TRUE	2.36559	1	1	1	6.2131e+06	0
Medium	Q3UHC2	Leucine-rich repeat serine/threonine-protein kinase 1 OS=Mus musculus OX=10090 GN=Lrrk1 PE=1 SV=1	FALSE	TRUE	0.446872	1	1	1		2.25
Medium	Q6ZWQ7	Signal peptidase complex subunit 3 OS=Mus musculus OX=10090 GN=Spcs3 PE=1 SV=1	FALSE	TRUE	5	1	1	1	2.2844e+06	1.92
Medium	Q04207	Transcription factor p65 OS=Mus musculus OX=10090 GN=Rela PE=1 SV=1	FALSE	TRUE	2.55009	1	1	1	4.93433e+06	2.3
Medium	Q9D958	Signal peptidase complex subunit 1 OS=Mus musculus OX=10090 GN=Spcs1 PE=2 SV=3	FALSE	TRUE	8.07453	1	1	1	1.41383e+07	3.16
Medium	Q8BJY8	RF_PROK_I domain-containing protein OS=Mus musculus OX=10090 GN=Mtrf1 PE=2 SV=1	FALSE	TRUE	2.24215	1	1	1	1.36833e+06	0

## Sheet: Tab B
Table S1, Tab B Raw protein dataset for RIPA - wash protocol 1 To generate these datasets mouse 3T3L1 fibroblasts underwent surface biotinylation of membrane proteins prior to extraction using RIPA. Samples were separated using ultracentrifugation to remove insoluble membranous material. The resulting supernatant was purified using affinity chromatography with NeutAvidin beads. The beads were the…
Protein FDR Confidence	Accession	Description	Contaminant	Mouse	Coverage	# Peptides	# PSMs	# Unique Peptides	Area: F2: Sample	Score Sequest HT
High	B9EK95	Myof protein OS=Mus musculus OX=10090 GN=Myof PE=2 SV=1	FALSE	TRUE	54.1	106	194	5	4.72421e+07	518.3
High	E9Q390	Myoferlin OS=Mus musculus OX=10090 GN=Myof PE=1 SV=2	FALSE	TRUE	53.3203	102	189	1		505.51
High	E9Q616	AHNAK nucleoprotein (desmoyokin) OS=Mus musculus OX=10090 GN=Ahnak PE=1 SV=1	FALSE	TRUE	52.2984	128	171	128	5.18987e+08	418.54
High	B9EKP5	Filamin, alpha OS=Mus musculus OX=10090 GN=Flna PE=2 SV=1	FALSE	TRUE	45.2444	90	128	78	5.4385e+08	357.75
High	Q8VDD5	Myosin-9 OS=Mus musculus OX=10090 GN=Myh9 PE=1 SV=4	FALSE	TRUE	43.9286	77	106	67	2.45416e+08	301.87
High	P02769	Serum albumin OS=Bos taurus GN=ALB PE=1 SV=4	TRUE	FALSE	73.8056	53	241	46	1.02777e+10	686.72
High	Q7TPV4	Myb-binding protein 1A OS=Mus musculus OX=10090 GN=Mybbp1a PE=1 SV=2	FALSE	TRUE	44.3452	53	110	53	1.24285e+09	281.45
High	P04264	Keratin, type II cytoskeletal 1 OS=Homo sapiens GN=KRT1 PE=1 SV=6	TRUE	FALSE	61.3354	45	265	33	1.79563e+10	783.1
High	P35908	Keratin, type II cytoskeletal 2 epidermal OS=Homo sapiens GN=KRT2 PE=1 SV=2	TRUE	FALSE	75.7433	49	155	33	4.23457e+09	430.55
High	Q71LX8	Heat shock protein 84b OS=Mus musculus OX=10090 GN=Hsp90ab1 PE=1 SV=1	FALSE	TRUE	55.9392	42	132	26	2.79989e+09	370.35
High	Q9QXS1	Plectin OS=Mus musculus OX=10090 GN=Plec PE=1 SV=3	FALSE	TRUE	22.6817	92	98	81	61011328	233.43
High	P26039	Talin-1 OS=Mus musculus OX=10090 GN=Tln1 PE=1 SV=2	FALSE	TRUE	33.4908	60	73	52	1.41512e+08	203.93
High	B2RRX1	Actin, beta OS=Mus musculus OX=10090 GN=Actb PE=2 SV=1	TRUE	TRUE	76.8	24	240	1		624.61
High	Q80X90	Filamin-B OS=Mus musculus OX=10090 GN=Flnb PE=1 SV=3	FALSE	TRUE	34.7809	68	80	58	1.57363e+08	217.06
High	P63260	Actin, cytoplasmic 2 OS=Mus musculus OX=10090 GN=Actg1 PE=1 SV=1	FALSE	TRUE	76.8	24	238	1	5.61008e+07	619.17
High	P63017	Heat shock cognate 71 kDa protein OS=Mus musculus OX=10090 GN=Hspa8 PE=1 SV=1	FALSE	TRUE	54.0248	31	111	21	2.44117e+09	325.68
High	E9Q7G0	Nuclear mitotic apparatus protein 1 OS=Mus musculus OX=10090 GN=Numa1 PE=1 SV=1	FALSE	TRUE	33.9542	57	69	39	1.42491e+08	202
High	Q8VHX6	Filamin-C OS=Mus musculus OX=10090 GN=Flnc PE=1 SV=3	FALSE	TRUE	28.1731	62	74	49	1.81516e+08	196.34
High	P35527	Keratin, type I cytoskeletal 9 OS=Homo sapiens GN=KRT9 PE=1 SV=3	TRUE	FALSE	73.6758	35	157	34	7.8552e+09	436.88
High	E9PVX6	Proliferation marker protein Ki-67 OS=Mus musculus OX=10090 GN=Mki67 PE=1 SV=1	FALSE	TRUE	24.2682	56	67	56	1.52206e+08	189.54
High	Q02248	Catenin beta-1 OS=Mus musculus OX=10090 GN=Ctnnb1 PE=1 SV=1	FALSE	TRUE	55.3137	33	63	28	3.80622e+08	162.02
High	P13645	Keratin, type I cytoskeletal 10 OS=Homo sapiens GN=KRT10 PE=1 SV=6	TRUE	FALSE	54.9658	33	135	28	1.06767e+10	379.78
High	P58252	Elongation factor 2 OS=Mus musculus OX=10090 GN=Eef2 PE=1 SV=2	FALSE	TRUE	45.338	40	87	39	1.61103e+09	220.77
High	P52480	Pyruvate kinase PKM OS=Mus musculus OX=10090 GN=Pkm PE=1 SV=4	FALSE	TRUE	57.8154	26	73	26	2.70185e+09	213.17
High	A0A1L1SV25	Alpha-actinin-4 OS=Mus musculus OX=10090 GN=Actn4 PE=1 SV=1	FALSE	TRUE	48.0687	37	51	22	1.26587e+08	156.82
High	P07901	Heat shock protein HSP 90-alpha OS=Mus musculus OX=10090 GN=Hsp90aa1 PE=1 SV=4	FALSE	TRUE	47.3397	35	84	20	7.81013e+08	235.26
High	Q99JX6	Annexin OS=Mus musculus OX=10090 GN=Anxa6 PE=2 SV=1	FALSE	TRUE	62.5187	38	60	6	1.32789e+08	158.51
High	P48678	Prelamin-A/C OS=Mus musculus OX=10090 GN=Lmna PE=1 SV=2	FALSE	TRUE	58.9474	35	52	34	773113578	150.48
High	Q5SXR6	Clathrin heavy chain OS=Mus musculus OX=10090 GN=Cltc PE=1 SV=1	FALSE	TRUE	28.9458	42	50	42	7.35719e+07	127.83
High	P20029	Endoplasmic reticulum chaperone BiP OS=Mus musculus OX=10090 GN=Hspa5 PE=1 SV=3	FALSE	TRUE	46.7176	30	62	28	862926375	180.14
High	P11276	Fibronectin OS=Mus musculus OX=10090 GN=Fn1 PE=1 SV=4	FALSE	TRUE	19.5398	36	44	36	1.89336e+08	127.08
High	P08779	Keratin, type I cytoskeletal 16 OS=Homo sapiens GN=KRT16 PE=1 SV=4	TRUE	FALSE	65.5391	31	84	15	5.78353e+08	224.39
High	Q7TPR4	Alpha-actinin-1 OS=Mus musculus OX=10090 GN=Actn1 PE=1 SV=1	FALSE	TRUE	44.5067	36	52	19	1.60175e+08	143.48
High	A0A1S6GWH5	UBA_e1_C domain-containing protein OS=Mus musculus OX=10090 GN=Uba1 PE=2 SV=1	FALSE	TRUE	28.8014	25	43	25	5.47438e+08	122.55
High	Q29443	Serotransferrin OS=Bos taurus GN=TF PE=2 SV=1	TRUE	FALSE	48.1534	26	44	25	3.16915e+08	127.5
High	P62737	Actin, aortic smooth muscle OS=Mus musculus OX=10090 GN=Acta2 PE=1 SV=1	FALSE	TRUE	47.7454	18	148	7	3.20273e+09	372.29
High	P08113	Endoplasmin OS=Mus musculus OX=10090 GN=Hsp90b1 PE=1 SV=2	FALSE	TRUE	40.399	31	56	30	5.48733e+08	147.77
High	P63038	60 kDa heat shock protein, mitochondrial OS=Mus musculus OX=10090 GN=Hspd1 PE=1 SV=1	FALSE	TRUE	56.0209	26	61	26	1.96662e+09	168.78
High	P02533	Keratin, type I cytoskeletal 14 OS=Homo sapiens GN=KRT14 PE=1 SV=4	TRUE	FALSE	60.1695	30	82	9	5.53825e+08	217.28
High	P14824	Annexin A6 OS=Mus musculus OX=10090 GN=Anxa6 PE=1 SV=3	FALSE	TRUE	56.7608	33	54	1	3.75e+06	139.96
High	Q542G9	Annexin OS=Mus musculus OX=10090 GN=Anxa2 PE=1 SV=1	FALSE	TRUE	70.2065	27	69	27	3.70698e+09	205.09
High	P62960	Y-box-binding protein 1 OS=Mus musculus OX=10090 GN=Ybx1 PE=1 SV=3	FALSE	TRUE	71.7391	17	55	5	1.32212e+09	186.33
High	A0A0A0MQF6	Glyceraldehyde-3-phosphate dehydrogenase OS=Mus musculus OX=10090 GN=Gapdh PE=1 SV=1	FALSE	TRUE	52.0891	16	73	16	5.85442e+09	198.21
High	P13647	Keratin, type II cytoskeletal 5 OS=Homo sapiens GN=KRT5 PE=1 SV=3	TRUE	FALSE	47.6271	34	80	18	1.04488e+09	212
High	P19324	Serpin H1 OS=Mus musculus OX=10090 GN=Serpinh1 PE=1 SV=3	FALSE	TRUE	45.5635	17	60	17	1.15418e+09	157.72
High	P01012	Ovalbumin OS=Gallus gallus GN=SERPINB14 PE=1 SV=2	TRUE	FALSE	54.4041	15	88	15	5.07215e+09	239.34
High	P02538	Keratin, type II cytoskeletal 6A OS=Homo sapiens GN=KRT6A PE=1 SV=3	TRUE	FALSE	50.8865	36	74	2	1.27022e+08	197.45
High	P56480	ATP synthase subunit beta, mitochondrial OS=Mus musculus OX=10090 GN=Atp5f1b PE=1 SV=2	FALSE	TRUE	42.7221	17	53	17	9.5608e+08	156.95
High	Q64727	Vinculin OS=Mus musculus OX=10090 GN=Vcl PE=1 SV=4	FALSE	TRUE	43.7148	40	49	40	1.95961e+08	128.86
High	P04259	Keratin, type II cytoskeletal 6B OS=Homo sapiens GN=KRT6B PE=1 SV=5	TRUE	FALSE	52.305	36	80	3	8.92104e+07	210.9
High	Q86YZ3	Hornerin OS=Homo sapiens GN=HRNR PE=1 SV=2	TRUE	FALSE	17.8596	16	29	16	5.636e+08	102.8
High	P68369	Tubulin alpha-1A chain OS=Mus musculus OX=10090 GN=Tuba1a PE=1 SV=1	FALSE	TRUE	59.4235	21	58	7	1.52185e+09	161.58
High	Q9JKF1	Ras GTPase-activating-like protein IQGAP1 OS=Mus musculus OX=10090 GN=Iqgap1 PE=1 SV=2	FALSE	TRUE	26.554	36	40	36	5.65226e+07	104.49
High	A2AJI0	MAP7 domain-containing protein 1 OS=Mus musculus OX=10090 GN=Map7d1 PE=1 SV=1	FALSE	TRUE	41.9622	30	48	29	1.18601e+09	138.05
High	Q9D0E1	Heterogeneous nuclear ribonucleoprotein M OS=Mus musculus OX=10090 GN=Hnrnpm PE=1 SV=3	FALSE	TRUE	49.6571	32	45	32	3.00263e+08	122.96
High	P27773	Protein disulfide-isomerase A3 OS=Mus musculus OX=10090 GN=Pdia3 PE=1 SV=2	FALSE	TRUE	55.0495	27	51	27	1.19882e+09	138.53
High	Q02257	Junction plakoglobin OS=Mus musculus OX=10090 GN=Jup PE=1 SV=3	FALSE	TRUE	40.4027	24	44	19	2.2731e+08	100.53
High	Q6A0F1	MKIAA0002 protein (Fragment) OS=Mus musculus OX=10090 GN=Cct8 PE=2 SV=1	FALSE	TRUE	52.6126	26	39	26	4.77698e+08	107.37
High	P38647	Stress-70 protein, mitochondrial OS=Mus musculus OX=10090 GN=Hspa9 PE=1 SV=3	FALSE	TRUE	44.1826	28	50	27	4.45278e+08	134.79
High	P99024	Tubulin beta-5 chain OS=Mus musculus OX=10090 GN=Tubb5 PE=1 SV=1	FALSE	TRUE	60.8108	19	74	4	8.17088e+08	207.67
High	P48668	Keratin, type II cytoskeletal 6C OS=Homo sapiens GN=KRT6C PE=1 SV=3	TRUE	FALSE	50.7092	35	69	1	2.52264e+07	181.41
High	Q3TW51	Staphylococcal nuclease domain-containing protein OS=Mus musculus OX=10090 GN=Snd1 PE=2 SV=1	FALSE	TRUE	41.2088	34	48	34	3.80784e+08	104.41
High	P10126	Elongation factor 1-alpha 1 OS=Mus musculus OX=10090 GN=Eef1a1 PE=1 SV=3	FALSE	TRUE	42.8571	17	93	17	7.56476e+09	247.25
High	Q99K58	Fibulin 2 OS=Mus musculus OX=10090 GN=Fbln2 PE=2 SV=1	FALSE	TRUE	25.3833	25	36	1	37523943	100.26
High	A0A571BEC9	Perilipin-4 OS=Mus musculus OX=10090 GN=Plin4 PE=1 SV=1	FALSE	TRUE	48.7196	24	38	24	5.84426e+08	90.02
High	Q14AX9	Mannose receptor, C type 2 OS=Mus musculus OX=10090 GN=Mrc2 PE=2 SV=1	FALSE	TRUE	19.5402	24	35	24	1.17262e+08	88.7
High	Q8VDN2	Sodium/potassium-transporting ATPase subunit alpha-1 OS=Mus musculus OX=10090 GN=Atp1a1 PE=1 SV=1	FALSE	TRUE	29.13	25	31	23	2.36325e+08	86.71
High	B7STB7	Annexin OS=Mus musculus OX=10090 GN=Anxa1 PE=2 SV=1	FALSE	TRUE	70.2312	25	56	25	2.54988e+09	148.1
High	Q542X7	Uncharacterized protein OS=Mus musculus OX=10090 GN=Cct2 PE=1 SV=1	FALSE	TRUE	53.6449	23	35	23	3.91494e+08	99.38
High	P68372	Tubulin beta-4B chain OS=Mus musculus OX=10090 GN=Tubb4b PE=1 SV=1	FALSE	TRUE	54.6067	18	71	2	5.88861e+08	193.59
High	P09411	Phosphoglycerate kinase 1 OS=Mus musculus OX=10090 GN=Pgk1 PE=1 SV=4	FALSE	TRUE	62.8297	20	41	20	6.34508e+08	129.74
High	Q3TFG3	Uncharacterized protein OS=Mus musculus OX=10090 GN=Eif4a1 PE=2 SV=1	FALSE	TRUE	52.4631	21	48	11	5.9412e+08	132.81
High	P29533	Vascular cell adhesion protein 1 OS=Mus musculus OX=10090 GN=Vcam1 PE=1 SV=1	FALSE	TRUE	35.0474	24	36	14	2.86954e+08	110
High	P26041	Moesin OS=Mus musculus OX=10090 GN=Msn PE=1 SV=3	FALSE	TRUE	42.6343	29	45	20	5.27437e+08	113.93
High	P37889	Fibulin-2 OS=Mus musculus OX=10090 GN=Fbln2 PE=1 SV=2	FALSE	TRUE	24.4062	26	36	2	3.30509e+07	100.36
High	E9QNN1	ATP-dependent RNA helicase A OS=Mus musculus OX=10090 GN=Dhx9 PE=1 SV=1	FALSE	TRUE	24.0607	27	35	27	9.7582e+07	86.83
High	Q8BKG3	Inactive tyrosine-protein kinase 7 OS=Mus musculus OX=10090 GN=Ptk7 PE=1 SV=1	FALSE	TRUE	29.661	26	34	26	272204127	91
High	Q61699	Heat shock protein 105 kDa OS=Mus musculus OX=10090 GN=Hsph1 PE=1 SV=2	FALSE	TRUE	33.4499	24	32	22	204449836	82.23
High	E9QB01	Neural cell adhesion molecule 1 OS=Mus musculus OX=10090 GN=Ncam1 PE=1 SV=2	FALSE	TRUE	36.278	23	43	3	60440662	120.94
High	P51655	Glypican-4 OS=Mus musculus OX=10090 GN=Gpc4 PE=1 SV=2	FALSE	TRUE	40.754	19	36	19	3.60478e+08	93.1
High	Q62261	Spectrin beta chain, non-erythrocytic 1 OS=Mus musculus OX=10090 GN=Sptbn1 PE=1 SV=2	FALSE	TRUE	17.0123	33	35	31	7.60605e+07	87.7
High	Q8BMK4	Cytoskeleton-associated protein 4 OS=Mus musculus OX=10090 GN=Ckap4 PE=1 SV=2	FALSE	TRUE	45.913	25	39	25	2.9641e+08	113.3
High	P13595	Neural cell adhesion molecule 1 OS=Mus musculus OX=10090 GN=Ncam1 PE=1 SV=3	FALSE	TRUE	26.9955	22	39	2	1.21038e+08	109.92
High	Q3V1M8	Uncharacterized protein OS=Mus musculus OX=10090 GN=Hdlbp PE=2 SV=1	FALSE	TRUE	27.3659	28	37	28	9.71348e+07	96.24
High	Q3TWV0	IF rod domain-containing protein OS=Mus musculus OX=10090 GN=Vim PE=2 SV=1	FALSE	TRUE	44.4206	19	30	2	1.03464e+08	87.46
High	Q3TUQ5	Pinin OS=Mus musculus OX=10090 GN=Pnn PE=1 SV=1	FALSE	TRUE	29.4766	22	34	22	5.85236e+08	96.46
High	A0A0A0MQA5	Tubulin alpha chain (Fragment) OS=Mus musculus OX=10090 GN=Tuba4a PE=1 SV=1	FALSE	TRUE	47.7987	18	43	4	1.38962e+08	119.32
High	P29341	Polyadenylate-binding protein 1 OS=Mus musculus OX=10090 GN=Pabpc1 PE=1 SV=2	FALSE	TRUE	32.8616	20	37	16	2.87109e+08	90.43
High	Q9D8N0	Elongation factor 1-gamma OS=Mus musculus OX=10090 GN=Eef1g PE=1 SV=3	FALSE	TRUE	34.0961	17	41	17	7.76144e+08	113.49
High	B1AX58	Plastin-3 OS=Mus musculus OX=10090 GN=Pls3 PE=1 SV=1	FALSE	TRUE	40.3756	23	31	23	1.66613e+08	84.78
High	P30416	Peptidyl-prolyl cis-trans isomerase FKBP4 OS=Mus musculus OX=10090 GN=Fkbp4 PE=1 SV=5	FALSE	TRUE	55.6769	24	41	24	339621202	92.34
High	Q7TMM9	Tubulin beta-2A chain OS=Mus musculus OX=10090 GN=Tubb2a PE=1 SV=1	FALSE	TRUE	44.0449	16	60	2	21135648	169.39
High	Q3U4U6	T-complex protein 1 subunit gamma OS=Mus musculus OX=10090 GN=Cct3 PE=1 SV=1	FALSE	TRUE	46.422	23	33	23	2.70607e+08	85.61
High	P70168	Importin subunit beta-1 OS=Mus musculus OX=10090 GN=Kpnb1 PE=1 SV=2	FALSE	TRUE	30.137	19	33	19	2.67146e+08	86.97
High	P13020	Gelsolin OS=Mus musculus OX=10090 GN=Gsn PE=1 SV=3	FALSE	TRUE	28.3333	17	31	17	4.81097e+08	85.33
High	A6MDD3	CD109 antigen OS=Mus musculus OX=10090 GN=Cd109 PE=1 SV=1	FALSE	TRUE	19.0014	21	25	21	8.56591e+07	69.66
High	Q99PL5	Ribosome-binding protein 1 OS=Mus musculus OX=10090 GN=Rrbp1 PE=1 SV=2	FALSE	TRUE	19.19	25	32	25	1.38784e+08	87.19
High	P10493	Nidogen-1 OS=Mus musculus OX=10090 GN=Nid1 PE=1 SV=2	FALSE	TRUE	22.9719	21	27	21	1.72387e+08	75.54
High	P46935	E3 ubiquitin-protein ligase NEDD4 OS=Mus musculus OX=10090 GN=Nedd4 PE=1 SV=3	FALSE	TRUE	35.513	30	36	30	136745165	83.58
High	E9PVC5	Eukaryotic translation initiation factor 4 gamma 1 OS=Mus musculus OX=10090 GN=Eif4g1 PE=1 SV=1	FALSE	TRUE	20.138	26	29	26	5.49903e+07	79.51
High	Q8BH64	EH domain-containing protein 2 OS=Mus musculus OX=10090 GN=Ehd2 PE=1 SV=1	FALSE	TRUE	41.2523	20	31	18	1.75497e+08	82.39
High	A3KGU9	Spectrin alpha chain, non-erythrocytic 1 OS=Mus musculus OX=10090 GN=Sptan1 PE=1 SV=2	FALSE	TRUE	15.6525	34	36	34	2.8648e+07	78.17
High	Q3TJ71	UDP-glucose 6-dehydrogenase OS=Mus musculus OX=10090 GN=Ugdh PE=2 SV=1	FALSE	TRUE	42.7992	18	28	18	3.60536e+08	73.7
High	Q3UPL0	Protein transport protein Sec31A OS=Mus musculus OX=10090 GN=Sec31a PE=1 SV=2	FALSE	TRUE	22.8455	23	28	23	91793385	75.09
High	B2RXS4	Plexin-B2 OS=Mus musculus OX=10090 GN=Plxnb2 PE=1 SV=1	FALSE	TRUE	17.1553	26	29	26	1.33855e+08	73.96
High	Q9DCN2	NADH-cytochrome b5 reductase 3 OS=Mus musculus OX=10090 GN=Cyb5r3 PE=1 SV=3	FALSE	TRUE	52.4917	14	36	14	1089561129	103.96
High	Q3TFD9	IF rod domain-containing protein OS=Mus musculus OX=10090 GN=Vim PE=2 SV=1	FALSE	TRUE	48.4979	21	32	4	1.05218e+08	88.62
High	Q04695	Keratin, type I cytoskeletal 17 OS=Homo sapiens GN=KRT17 PE=1 SV=2	TRUE	FALSE	48.8426	24	51	12	453757504	126.15
High	Q3UD67	AA_TRNA_LIGASE_II_ALA domain-containing protein OS=Mus musculus OX=10090 GN=Aars PE=2 SV=1	FALSE	TRUE	36.3636	28	33	28	2.2288e+08	88.11
High	Q91YK2	Ribosomal RNA processing protein 1 homolog B OS=Mus musculus OX=10090 GN=Rrp1b PE=1 SV=2	FALSE	TRUE	31.768	20	31	20	1.54012e+08	91.01
High	P55288	Cadherin-11 OS=Mus musculus OX=10090 GN=Cdh11 PE=1 SV=1	FALSE	TRUE	29.2714	18	29	18	2.96361e+08	86.78
High	Q9DBG5	Perilipin-3 OS=Mus musculus OX=10090 GN=Plin3 PE=1 SV=1	FALSE	TRUE	53.5469	16	28	16	434835026	81.62
High	P19096	Fatty acid synthase OS=Mus musculus OX=10090 GN=Fasn PE=1 SV=2	FALSE	TRUE	14.0575	29	31	29	5.36748e+07	72.48
High	Q3TIP0	26S proteasome non-ATPase regulatory subunit 2 OS=Mus musculus OX=10090 GN=Psmd2 PE=2 SV=1	FALSE	TRUE	25.9912	20	25	20	5.91807e+07	65.13
High	Q60950	MYB-1a OS=Mus musculus OX=10090 GN=Ybx1 PE=2 SV=1	FALSE	TRUE	51.5528	13	39	1	6.85727e+06	122.52
High	Q3UH59	Myosin-10 OS=Mus musculus OX=10090 GN=Myh10 PE=1 SV=1	FALSE	TRUE	13.4128	24	28	14	7.83569e+07	65.78
High	G5E924	Heterogeneous nuclear ribonucleoprotein L (Fragment) OS=Mus musculus OX=10090 GN=Hnrnpl PE=1 SV=1	FALSE	TRUE	31.0569	13	23	13	1.96544e+08	72.11
High	Q80UE5	Band 4.1-like protein 2 OS=Mus musculus OX=10090 GN=Epb41l2 PE=1 SV=1	FALSE	TRUE	38.8889	26	28	1		70.95
High	B6ZHD0	Erythrocyte protein band 4.1-like 2 OS=Mus musculus OX=10090 GN=Epb41l2 PE=2 SV=1	FALSE	TRUE	35.83	26	28	1	65543688	69.72
High	E9Q8Z8	Catenin delta-1 OS=Mus musculus OX=10090 GN=Ctnnd1 PE=1 SV=1	FALSE	TRUE	22.7508	17	25	1	1.04449e+07	67.3
High	P80316	T-complex protein 1 subunit epsilon OS=Mus musculus OX=10090 GN=Cct5 PE=1 SV=1	FALSE	TRUE	41.5896	21	33	20	252513874	75.72
High	E9Q8Z5	Catenin delta-1 OS=Mus musculus OX=10090 GN=Ctnnd1 PE=1 SV=1	FALSE	TRUE	23.2979	17	25	1	1.05643e+07	66.62
High	P09405	Nucleolin OS=Mus musculus OX=10090 GN=Ncl PE=1 SV=2	FALSE	TRUE	27.7228	21	32	21	420389194	82.56
High	Q3TW74	Uncharacterized protein OS=Mus musculus OX=10090 GN=Mthfd1 PE=2 SV=1	FALSE	TRUE	33.262	26	27	26	8.30354e+07	71.32
High	Q91V55	40S ribosomal protein S5 OS=Mus musculus OX=10090 GN=Rps5 PE=1 SV=1	FALSE	TRUE	50.4902	14	52	13	3.01456e+09	117.13
High	A0A286YD87	Growth arrest-specific protein 1 OS=Mus musculus OX=10090 GN=Gas1 PE=1 SV=1	FALSE	TRUE	39.0625	11	23	11	866248660	80.03
High	Q9Z2X1	Heterogeneous nuclear ribonucleoprotein F OS=Mus musculus OX=10090 GN=Hnrnpf PE=1 SV=3	FALSE	TRUE	44.8193	13	35	12	9.02724e+08	90.96
High	Q04750	DNA topoisomerase 1 OS=Mus musculus OX=10090 GN=Top1 PE=1 SV=2	FALSE	TRUE	28.292	19	25	19	1.19446e+08	66.85
High	P15497	Apolipoprotein A-I OS=Bos taurus GN=APOA1 PE=1 SV=3	TRUE	FALSE	69.0566	19	36	19	1.96084e+09	96.35
High	P54071	Isocitrate dehydrogenase [NADP], mitochondrial OS=Mus musculus OX=10090 GN=Idh2 PE=1 SV=3	FALSE	TRUE	43.5841	18	26	17	2.20865e+08	62.41
High	Q76MZ3	Serine/threonine-protein phosphatase 2A 65 kDa regulatory subunit A alpha isoform OS=Mus musculus OX=10090 GN=Ppp2r1a PE=1 SV=3	FALSE	TRUE	35.3141	17	27	14	2.29068e+08	80.69
High	Q3UI57	DNA helicase OS=Mus musculus OX=10090 GN=Mcm3 PE=1 SV=1	FALSE	TRUE	41.133	25	30	25	1.85209e+08	83.65
High	Q6ZQ38	Cullin-associated NEDD8-dissociated protein 1 OS=Mus musculus OX=10090 GN=Cand1 PE=1 SV=2	FALSE	TRUE	24.2276	26	29	26	8.84171e+07	68.45
High	P80315	T-complex protein 1 subunit delta OS=Mus musculus OX=10090 GN=Cct4 PE=1 SV=3	FALSE	TRUE	43.0427	21	34	20	3.8996e+08	85.97
High	E9QN31	Probable 28S rRNA (cytosine-C(5))-methyltransferase OS=Mus musculus OX=10090 GN=Nop2 PE=1 SV=1	FALSE	TRUE	34.5088	23	30	12	4.12757e+08	76.2
High	B2M1R6	Heterogeneous nuclear ribonucleoprotein K OS=Mus musculus OX=10090 GN=Hnrnpk PE=1 SV=1	FALSE	TRUE	46.1364	17	39	17	6.18255e+08	86.76
High	A0A0R4J0Z1	Protein disulfide-isomerase A4 OS=Mus musculus OX=10090 GN=Pdia4 PE=1 SV=1	FALSE	TRUE	36.8175	22	30	22	2.43392e+08	83.16
High	Q3UPA3	Rab GDP dissociation inhibitor (Fragment) OS=Mus musculus OX=10090 GN=Gdi2 PE=2 SV=1	FALSE	TRUE	45.7031	19	33	19	2.4134e+08	74.24
High	Q9JIF7	Coatomer subunit beta OS=Mus musculus OX=10090 GN=Copb1 PE=1 SV=1	FALSE	TRUE	27.5971	20	23	20	6.08341e+07	59.91
High	Q8VIJ6	Splicing factor, proline- and glutamine-rich OS=Mus musculus OX=10090 GN=Sfpq PE=1 SV=1	FALSE	TRUE	26.8956	19	29	18	2.70735e+08	77.66
High	Q7TMK9	Heterogeneous nuclear ribonucleoprotein Q OS=Mus musculus OX=10090 GN=Syncrip PE=1 SV=2	FALSE	TRUE	35.634	19	27	13	7.21365e+07	67.52
High	Q1WWK3	Hist1h1b protein (Fragment) OS=Mus musculus OX=10090 GN=H1f5 PE=2 SV=1	FALSE	TRUE	37.8378	15	39	3	1.20918e+09	117.06
High	F6ZQA3	Nuclear mitotic apparatus protein 1 (Fragment) OS=Mus musculus OX=10090 GN=Numa1 PE=1 SV=1	FALSE	TRUE	35.8974	19	25	1	26413428	71.87
High	P12763	Alpha-2-HS-glycoprotein OS=Bos taurus GN=AHSG PE=1 SV=2	TRUE	FALSE	35.9331	11	33	11	1.78677e+09	107.15
High	Q03265	ATP synthase subunit alpha, mitochondrial OS=Mus musculus OX=10090 GN=Atp5f1a PE=1 SV=1	FALSE	TRUE	38.3363	18	32	18	7.29972e+08	86.98
High	P43274	Histone H1.4 OS=Mus musculus OX=10090 GN=H1-4 PE=1 SV=2	FALSE	TRUE	39.2694	17	46	6	9303464811	124.62
High	P11983	T-complex protein 1 subunit alpha OS=Mus musculus OX=10090 GN=Tcp1 PE=1 SV=3	FALSE	TRUE	48.2014	21	29	21	2.07018e+08	72.53
High	Q3U0V1	Far upstream element-binding protein 2 OS=Mus musculus OX=10090 GN=Khsrp PE=1 SV=2	FALSE	TRUE	30.615	17	21	16	1.19509e+08	63.79
High	P15864	Histone H1.2 OS=Mus musculus OX=10090 GN=H1-2 PE=1 SV=2	FALSE	TRUE	44.3396	16	41	4	6.82669e+08	116.17
High	A3KML3	Tyrosine 3-monooxygenase/tryptophan 5-monooxygenase activation protein, theta polypeptide OS=Mus musculus OX=10090 GN=Ywhaq PE=2 SV=1	FALSE	TRUE	57.1429	15	28	10	4.84452e+08	75.78
High	Q3U8W9	Uncharacterized protein OS=Mus musculus OX=10090 GN=Hnrnpr PE=2 SV=1	FALSE	TRUE	25.6329	16	26	10	6.38633e+07	64.6
High	Q8BKC5	Importin-5 OS=Mus musculus OX=10090 GN=Ipo5 PE=1 SV=3	FALSE	TRUE	21.5132	21	24	21	5.36679e+07	61.49
High	E9QA16	Caldesmon 1 OS=Mus musculus OX=10090 GN=Cald1 PE=1 SV=1	FALSE	TRUE	30.597	16	25	2	1.17361e+08	76.4
High	Q3TIT3	Uncharacterized protein OS=Mus musculus OX=10090 GN=Ehd1 PE=2 SV=1	FALSE	TRUE	38.764	19	25	18	1.23886e+08	70.64
High	Q3U292	H15 domain-containing protein OS=Mus musculus OX=10090 GN=H1f3 PE=2 SV=1	FALSE	TRUE	38.4615	15	40	3	2.17273e+09	112.59
High	P40142	Transketolase OS=Mus musculus OX=10090 GN=Tkt PE=1 SV=1	FALSE	TRUE	31.7817	19	22	19	2.99087e+08	59.26
High	P68040	Receptor of activated protein C kinase 1 OS=Mus musculus OX=10090 GN=Rack1 PE=1 SV=3	FALSE	TRUE	61.5142	17	28	17	3.55892e+08	74.46
High	Q5FW97	Enolase 1, alpha non-neuron OS=Mus musculus OX=10090 GN=EG433182 PE=1 SV=1	FALSE	TRUE	47.6959	18	34	16	8.29801e+08	81.81
High	Q3TVV6	Uncharacterized protein OS=Mus musculus OX=10090 GN=Hnrnpu PE=2 SV=1	FALSE	TRUE	20	16	25	15	5.55397e+08	63.74
High	Q8BFZ3	Beta-actin-like protein 2 OS=Mus musculus OX=10090 GN=Actbl2 PE=1 SV=1	FALSE	TRUE	24.2021	8	73	1	7.71723e+07	173.28
High	Q3U741	Probable ATP-dependent RNA helicase DDX17 OS=Mus musculus OX=10090 GN=Ddx17 PE=1 SV=1	FALSE	TRUE	33.7423	21	26	16	8.6716e+07	62.46
High	Q5U438	Nucleophosmin 1 OS=Mus musculus OX=10090 GN=Npm1 PE=2 SV=1	FALSE	TRUE	54.4521	12	23	12	1.4173e+09	70.46
High	E9Q557	Desmoplakin OS=Mus musculus OX=10090 GN=Dsp PE=1 SV=1	FALSE	TRUE	8.32466	23	29	23	8.75706e+07	62.33
High	Q61753	D-3-phosphoglycerate dehydrogenase OS=Mus musculus OX=10090 GN=Phgdh PE=1 SV=3	FALSE	TRUE	30.5816	15	27	15	464069086	76.47
High	Q8BFR5	Elongation factor Tu, mitochondrial OS=Mus musculus OX=10090 GN=Tufm PE=1 SV=1	FALSE	TRUE	40.9292	16	23	16	1.52496e+08	58.53
High	Q3UWW9	PCI domain-containing protein OS=Mus musculus OX=10090 GN=Psmd11 PE=2 SV=1	FALSE	TRUE	47.6303	18	24	18	1.18621e+08	64.44
High	Q3TQX5	Uncharacterized protein OS=Mus musculus OX=10090 GN=Ddx3x PE=1 SV=1	FALSE	TRUE	35.9517	21	25	19	1.21918e+08	53.79
High	Q3UXP2	RuvB-like helicase OS=Mus musculus OX=10090 GN=Ruvbl2 PE=2 SV=1	FALSE	TRUE	47.0842	19	24	19	7.87682e+07	58.65
High	P09055	Integrin beta-1 OS=Mus musculus OX=10090 GN=Itgb1 PE=1 SV=1	FALSE	TRUE	23.5589	17	26	17	2.13704e+08	70.36
High	E9QA15	Caldesmon 1 OS=Mus musculus OX=10090 GN=Cald1 PE=1 SV=1	FALSE	TRUE	19.6615	15	22	1		66.72
High	Q3U9N8	Inosine-5'-monophosphate dehydrogenase OS=Mus musculus OX=10090 GN=Impdh2 PE=2 SV=1	FALSE	TRUE	39.8833	16	20	15	111860291	64.9
High	P62806	Histone H4 OS=Mus musculus OX=10090 GN=H4c1 PE=1 SV=2	FALSE	TRUE	54.3689	10	93	10	1.95645e+10	189.17
High	Q571M2	MKIAA4025 protein (Fragment) OS=Mus musculus OX=10090 GN=Hspa4 PE=2 SV=1	FALSE	TRUE	29.7849	20	20	19	3.31692e+07	58.84
High	P56399	Ubiquitin carboxyl-terminal hydrolase 5 OS=Mus musculus OX=10090 GN=Usp5 PE=1 SV=1	FALSE	TRUE	23.0769	14	21	14	7.07627e+07	51.4
High	P43276	Histone H1.5 OS=Mus musculus OX=10090 GN=H1-5 PE=1 SV=2	FALSE	TRUE	38.1166	15	36	3	1.20918e+09	107.82
High	Q3UMM1	Tubulin beta chain OS=Mus musculus OX=10090 GN=Tubb6 PE=1 SV=1	FALSE	TRUE	40.4922	15	34	7	5.32329e+07	86.15
High	Q80Y09	Pdcd6ip protein OS=Mus musculus OX=10090 GN=Pdcd6ip PE=2 SV=1	FALSE	TRUE	27.9817	23	28	23	5.32006e+07	65.2
High	A2A7S7	Tyrosine--tRNA ligase OS=Mus musculus OX=10090 GN=Yars PE=1 SV=1	FALSE	TRUE	40.9574	22	30	22	1.22153e+08	66.57
High	P17751	Triosephosphate isomerase OS=Mus musculus OX=10090 GN=Tpi1 PE=1 SV=4	FALSE	TRUE	42.8094	12	26	12	2031121059	77.44
High	Q69ZW4	MKIAA0899 protein (Fragment) OS=Mus musculus OX=10090 GN=Ap2a2 PE=2 SV=1	FALSE	TRUE	25.9566	22	25	15	7.43963e+07	59.94
High	P97311	DNA replication licensing factor MCM6 OS=Mus musculus OX=10090 GN=Mcm6 PE=1 SV=1	FALSE	TRUE	28.989	20	26	20	69360554	66.42
High	A7YY80	130kDa Protein 4.1B MEF cell isoform OS=Mus musculus OX=10090 GN=Epb41l3 PE=1 SV=1	FALSE	TRUE	34.0183	20	21	16	27611138	58.84
High	Q3UM23	Uncharacterized protein OS=Mus musculus OX=10090 GN=Rnh1 PE=2 SV=1	FALSE	TRUE	46.4912	15	24	15	1.62347e+08	65.85
High	Q3U0U5	Adenylyl cyclase-associated protein OS=Mus musculus OX=10090 GN=Cap1 PE=2 SV=1	FALSE	TRUE	41.5612	12	21	12	2.36e+08	54.93
High	Q61543	Golgi apparatus protein 1 OS=Mus musculus OX=10090 GN=Glg1 PE=1 SV=1	FALSE	TRUE	18.8936	20	24	20	9.62975e+07	53.31
High	A0A0N4SVX9	Dysferlin OS=Mus musculus OX=10090 GN=Dysf PE=1 SV=1	FALSE	TRUE	11.684	21	22	20	1.6288e+07	53.87
High	Q3UZG3	Uncharacterized protein OS=Mus musculus OX=10090 GN=Hnrnpa3 PE=2 SV=1	FALSE	TRUE	35.3562	11	22	2	2.98437e+07	61.5
High	P49718	DNA replication licensing factor MCM5 OS=Mus musculus OX=10090 GN=Mcm5 PE=1 SV=2	FALSE	TRUE	33.2425	20	25	20	1.22344e+08	61.33
High	Q9CWJ9	Bifunctional purine biosynthesis protein PURH OS=Mus musculus OX=10090 GN=Atic PE=1 SV=2	FALSE	TRUE	43.4122	19	24	19	1.27451e+08	54.29
High	Q8C2Q7	Heterogeneous nuclear ribonucleoprotein H OS=Mus musculus OX=10090 GN=Hnrnph1 PE=1 SV=1	FALSE	TRUE	37.7119	13	29	5	6.82961e+07	66.59
High	Q11011	Puromycin-sensitive aminopeptidase OS=Mus musculus OX=10090 GN=Npepps PE=1 SV=2	FALSE	TRUE	23.4783	20	20	20	9.28355e+07	49.56
High	Q5SUC3	Uncharacterized protein OS=Mus musculus OX=10090 GN=Canx PE=1 SV=1	FALSE	TRUE	31.1337	18	26	18	2.80472e+08	66.71
High	Q99KI0	Aconitate hydratase, mitochondrial OS=Mus musculus OX=10090 GN=Aco2 PE=1 SV=1	FALSE	TRUE	26.6667	17	20	17	85600658	48.8
High	Q3U7Z6	Phosphoglycerate mutase OS=Mus musculus OX=10090 GN=Pgam1 PE=1 SV=1	FALSE	TRUE	52.7559	10	18	10	4.90031e+08	50.44
High	P23116	Eukaryotic translation initiation factor 3 subunit A OS=Mus musculus OX=10090 GN=Eif3a PE=1 SV=5	FALSE	TRUE	16.8899	21	22	21	6.97409e+07	45.5
High	Q3UAG2	6-phosphogluconate dehydrogenase, decarboxylating OS=Mus musculus OX=10090 GN=Pgd PE=2 SV=1	FALSE	TRUE	36.2319	15	19	15	388456558	50.07
High	O54724	Caveolae-associated protein 1 OS=Mus musculus OX=10090 GN=Cavin1 PE=1 SV=1	FALSE	TRUE	39.7959	11	18	11	3.59015e+08	56
High	O08529	Calpain-2 catalytic subunit OS=Mus musculus OX=10090 GN=Capn2 PE=1 SV=4	FALSE	TRUE	22.8571	16	20	16	1.2759e+08	57.4
High	Q3TGQ3	Uncharacterized protein OS=Mus musculus OX=10090 GN=Ctnna1 PE=2 SV=1	FALSE	TRUE	27.0419	20	21	20	7.11017e+07	51.14
High	F8WIV2	Serine (or cysteine) peptidase inhibitor, clade B, member 6a OS=Mus musculus OX=10090 GN=Serpinb6a PE=1 SV=1	FALSE	TRUE	41.3534	16	21	16	2.11284e+08	54.43
High	Q8BP47	Asparagine--tRNA ligase, cytoplasmic OS=Mus musculus OX=10090 GN=NARS1 PE=1 SV=2	FALSE	TRUE	29.8748	16	20	16	1.39218e+08	56.84
High	Q3THH1	Uncharacterized protein OS=Mus musculus OX=10090 GN=Pdia6 PE=2 SV=1	FALSE	TRUE	27.6404	10	15	10	2.38068e+08	52.21
High	P32067	Lupus La protein homolog OS=Mus musculus OX=10090 GN=Ssb PE=1 SV=1	FALSE	TRUE	37.3494	15	22	15	2.39059e+08	61.95
High	Q6P4T2	U5 small nuclear ribonucleoprotein 200 kDa helicase OS=Mus musculus OX=10090 GN=Snrnp200 PE=1 SV=1	FALSE	TRUE	11.0955	20	21	20	2.81518e+07	48.86
High	P14733	Lamin-B1 OS=Mus musculus OX=10090 GN=Lmnb1 PE=1 SV=3	FALSE	TRUE	37.0748	22	23	20	7.50098e+07	60.41
High	Q3TL33	Uncharacterized protein OS=Mus musculus OX=10090 GN=Calu PE=2 SV=1	FALSE	TRUE	35.873	9	16	1	6.45215e+07	51.06
High	P35700	Peroxiredoxin-1 OS=Mus musculus OX=10090 GN=Prdx1 PE=1 SV=1	FALSE	TRUE	56.7839	11	25	11	1.83782e+09	68.94
High	Q5SWR1	AP complex subunit beta OS=Mus musculus OX=10090 GN=Ap2b1 PE=2 SV=1	FALSE	TRUE	22.1872	19	21	8	8.32212e+07	45.8
High	Q6PCP0	DEAD (Asp-Glu-Ala-Asp) box polypeptide 21 OS=Mus musculus OX=10090 GN=Ddx21 PE=2 SV=1	FALSE	TRUE	28.9072	21	22	21	9.52347e+07	57.56
High	Q3V3R1	Monofunctional C1-tetrahydrofolate synthase, mitochondrial OS=Mus musculus OX=10090 GN=Mthfd1l PE=1 SV=2	FALSE	TRUE	23.5415	20	22	20	70712162	55.7
High	Q80ZI9	WD repeat domain 1 (Fragment) OS=Mus musculus OX=10090 GN=Wdr1 PE=2 SV=1	FALSE	TRUE	25.8359	13	18	13	1.00062e+08	55.93
High	Q99LC5	Electron transfer flavoprotein subunit alpha, mitochondrial OS=Mus musculus OX=10090 GN=Etfa PE=1 SV=2	FALSE	TRUE	46.5465	11	16	11	2.29267e+08	52.59
High	O35639	Annexin A3 OS=Mus musculus OX=10090 GN=Anxa3 PE=1 SV=4	FALSE	TRUE	49.226	15	18	14	286633396	50.92
High	Q61687	Transcriptional regulator ATRX OS=Mus musculus OX=10090 GN=Atrx PE=1 SV=3	FALSE	TRUE	9.5315	16	17	16	2.66278e+07	50.39
High	Q3TUF3	Uncharacterized protein OS=Mus musculus OX=10090 GN=Calu PE=1 SV=1	FALSE	TRUE	38.7302	10	17	2	8.81631e+07	54.76
High	B2RSV4	Splicing factor 3b, subunit 3 OS=Mus musculus OX=10090 GN=Sf3b3 PE=2 SV=1	FALSE	TRUE	17.9951	18	20	18	6.09271e+07	50.49
High	Q0VG47	Heterogeneous nuclear ribonucleoprotein A3 OS=Mus musculus OX=10090 GN=Hnrnpa3 PE=2 SV=1	FALSE	TRUE	32.7731	10	19	1	381699780	57.49
High	P60335	Poly(rC)-binding protein 1 OS=Mus musculus OX=10090 GN=Pcbp1 PE=1 SV=1	FALSE	TRUE	44.1011	10	18	6	3.5019e+08	60.24
High	P97351	40S ribosomal protein S3a OS=Mus musculus OX=10090 GN=Rps3a PE=1 SV=3	FALSE	TRUE	40.1515	12	26	12	1075150422	63.54
High	Q544V4	Uncharacterized protein OS=Mus musculus OX=10090 PE=1 SV=1	FALSE	TRUE	41.1594	11	22	1	47372096	65.56
High	ENSEMBL:ENSBTAP00000007350	(Bos taurus) similar to Complement C4-A precursor [OS=Bos taurus]	TRUE	FALSE	14.0069	22	24	22	1.01553e+08	57.17
High	Q3UJN1	DNA helicase OS=Mus musculus OX=10090 GN=Mcm2 PE=2 SV=1	FALSE	TRUE	23.3297	18	19	18	6.33562e+07	46.7
High	Q3V117	ATP-citrate synthase OS=Mus musculus OX=10090 GN=Acly PE=1 SV=1	FALSE	TRUE	20.6176	18	22	18	5.43045e+07	59.81
High	Q3TIV6	Lysine--tRNA ligase OS=Mus musculus OX=10090 GN=Kars PE=1 SV=1	FALSE	TRUE	33.2773	20	26	20	1.64882e+08	63.29
High	Q5DTP7	MKIAA4075 protein (Fragment) OS=Mus musculus OX=10090 GN=Chd4 PE=2 SV=1	FALSE	TRUE	12.4422	20	22	16	4.61718e+07	56.99
High	B2CY77	Laminin receptor (Fragment) OS=Mus musculus OX=10090 GN=Rpsa PE=2 SV=1	FALSE	TRUE	45.4237	11	24	11	1015793805	75.82
High	P47962	60S ribosomal protein L5 OS=Mus musculus OX=10090 GN=Rpl5 PE=1 SV=3	FALSE	TRUE	36.0269	10	23	10	3.81049e+08	64.32
High	Q9JKB3	Y-box-binding protein 3 OS=Mus musculus OX=10090 GN=Ybx3 PE=1 SV=2	FALSE	TRUE	36.2881	11	24	5	1.51052e+08	69.69
High	Q4FJQ0	Rab7 OS=Mus musculus OX=10090 GN=Rab7 PE=1 SV=1	FALSE	TRUE	75.8454	15	22	15	4.65197e+08	62.83
High	P28658	Ataxin-10 OS=Mus musculus OX=10090 GN=Atxn10 PE=1 SV=2	FALSE	TRUE	31.1579	12	16	12	1.14749e+08	45.46
High	Q923G3	F-actin-capping protein subunit beta OS=Mus musculus OX=10090 GN=Capzb PE=2 SV=1	FALSE	TRUE	51.4706	13	24	13	2.39958e+08	73.41
High	A0A0F7IQ06	Alpha v integrin OS=Mus musculus OX=10090 GN=Itgav PE=2 SV=1	FALSE	TRUE	21.2644	19	22	19	1.90215e+08	54.35
High	P27046	Alpha-mannosidase 2 OS=Mus musculus OX=10090 GN=Man2a1 PE=1 SV=2	FALSE	TRUE	16	16	18	16	3.25391e+07	42
High	B7U582	Heat shock protein 70-2 OS=Mus musculus OX=10090 PE=3 SV=1	FALSE	TRUE	15.0079	10	27	1	4.65185e+07	78.87
High	Q3TXS7	26S proteasome non-ATPase regulatory subunit 1 OS=Mus musculus OX=10090 GN=Psmd1 PE=1 SV=1	FALSE	TRUE	24.0294	17	22	17	5.81677e+07	56.96
High	Q9D6Z1	Nucleolar protein 56 OS=Mus musculus OX=10090 GN=Nop56 PE=1 SV=2	FALSE	TRUE	31.0345	15	21	15	1.92547e+08	57.01
High	Q91VC3	Eukaryotic initiation factor 4A-III OS=Mus musculus OX=10090 GN=Eif4a3 PE=1 SV=3	FALSE	TRUE	35.5231	16	20	13	4.62483e+07	56.11
High	Q3V0Z8	Uncharacterized protein (Fragment) OS=Mus musculus OX=10090 GN=Ddx5 PE=2 SV=1	FALSE	TRUE	25.0725	17	20	12	1.33034e+08	50.84
High	Q9Z1N5	Spliceosome RNA helicase Ddx39b OS=Mus musculus OX=10090 GN=Ddx39b PE=1 SV=1	FALSE	TRUE	42.9907	17	25	10	114769535	53.99
High	P26645	Myristoylated alanine-rich C-kinase substrate OS=Mus musculus OX=10090 GN=Marcks PE=1 SV=2	FALSE	TRUE	59.8706	11	16	11	2.30577e+08	65.37
High	Q9DBV4	Matrix remodeling-associated protein 8 OS=Mus musculus OX=10090 GN=Mxra8 PE=1 SV=1	FALSE	TRUE	30.543	13	21	13	1.31648e+08	57.42
High	O55029	Coatomer subunit beta' OS=Mus musculus OX=10090 GN=Copb2 PE=1 SV=2	FALSE	TRUE	20.5525	16	18	16	7.60924e+07	43.29
High	P08752	Guanine nucleotide-binding protein G(i) subunit alpha-2 OS=Mus musculus OX=10090 GN=Gnai2 PE=1 SV=5	FALSE	TRUE	41.1268	12	16	7	9.77867e+07	44.77
High	Q99KC3	Nop2 protein OS=Mus musculus OX=10090 GN=Nop2 PE=2 SV=1	FALSE	TRUE	45.1389	13	19	2	144628176	54.33
High	Q8QZY1	Eukaryotic translation initiation factor 3 subunit L OS=Mus musculus OX=10090 GN=Eif3l PE=1 SV=1	FALSE	TRUE	28.3688	14	18	14	88599552	44.09
High	A2AQR0	Glycerol-3-phosphate dehydrogenase OS=Mus musculus OX=10090 GN=Gpd2 PE=1 SV=1	FALSE	TRUE	27.651	17	20	17	4.09998e+07	53.88
High	P63101	14-3-3 protein zeta/delta OS=Mus musculus OX=10090 GN=Ywhaz PE=1 SV=1	FALSE	TRUE	51.4286	13	23	9	316144485	59.11
High	Q6P5B0	RRP12-like protein OS=Mus musculus OX=10090 GN=Rrp12 PE=1 SV=1	FALSE	TRUE	17.2973	20	22	20	2.37371e+08	55.72
High	Q04857	Collagen alpha-1(VI) chain OS=Mus musculus OX=10090 GN=Col6a1 PE=1 SV=1	FALSE	TRUE	15.9024	12	16	12	4.42162e+07	41.07
High	O88569	Heterogeneous nuclear ribonucleoproteins A2/B1 OS=Mus musculus OX=10090 GN=Hnrnpa2b1 PE=1 SV=2	FALSE	TRUE	35.6941	10	18	8	4.21495e+08	51.27
High	Q3TIX6	Far upstream element (FUSE)-binding protein 3 OS=Mus musculus OX=10090 GN=Fubp3 PE=1 SV=1	FALSE	TRUE	33.3913	16	21	15	6.65745e+07	52.63
High	Q3TF40	Uncharacterized protein (Fragment) OS=Mus musculus OX=10090 GN=Nono PE=2 SV=1	FALSE	TRUE	22.9167	14	22	13	3.0506e+08	52.04
High	P26443	Glutamate dehydrogenase 1, mitochondrial OS=Mus musculus OX=10090 GN=Glud1 PE=1 SV=1	FALSE	TRUE	34.767	16	19	16	1.1022e+08	46.2
High	Q6ZQ61	MKIAA0723 protein (Fragment) OS=Mus musculus OX=10090 GN=Matr3 PE=2 SV=1	FALSE	TRUE	21.4789	15	23	15	9.20076e+07	43.72
High	Q9CZD3	Glycine--tRNA ligase OS=Mus musculus OX=10090 GN=Gars1 PE=1 SV=1	FALSE	TRUE	27.1605	17	23	17	2.44282e+08	51.26
High	P16045	Galectin-1 OS=Mus musculus OX=10090 GN=Lgals1 PE=1 SV=3	FALSE	TRUE	65.1852	7	24	7	2145151777	69.73
High	Q9D0R2	Threonine--tRNA ligase 1, cytoplasmic OS=Mus musculus OX=10090 GN=Tars1 PE=1 SV=2	FALSE	TRUE	23.1302	16	19	16	6.15796e+07	47.97
High	Q3U900	Dolichyl-diphosphooligosaccharide--protein glycosyltransferase subunit 1 OS=Mus musculus OX=10090 GN=Rpn1 PE=2 SV=1	FALSE	TRUE	27.9605	15	20	15	1.87859e+08	52.62
High	P08249	Malate dehydrogenase, mitochondrial OS=Mus musculus OX=10090 GN=Mdh2 PE=1 SV=3	FALSE	TRUE	52.6627	13	15	13	1.52985e+08	41.88
High	O08553	Dihydropyrimidinase-related protein 2 OS=Mus musculus OX=10090 GN=Dpysl2 PE=1 SV=2	FALSE	TRUE	32.6923	13	17	11	8.34995e+07	52.11
High	P43883	Perilipin-2 OS=Mus musculus OX=10090 GN=Plin2 PE=1 SV=2	FALSE	TRUE	33.1765	10	17	10	2.63888e+08	46.27
High	Q64737	Trifunctional purine biosynthetic protein adenosine-3 OS=Mus musculus OX=10090 GN=Gart PE=1 SV=3	FALSE	TRUE	20.9901	18	19	18	8.20417e+07	52.25
High	Q61990	Poly(rC)-binding protein 2 OS=Mus musculus OX=10090 GN=Pcbp2 PE=1 SV=1	FALSE	TRUE	37.5691	10	23	4	3.23329e+08	67.75
High	P17710	Hexokinase-1 OS=Mus musculus OX=10090 GN=Hk1 PE=1 SV=3	FALSE	TRUE	16.5298	15	16	15	4.60257e+07	42.14
High	A0A0R4J083	Long-chain-specific acyl-CoA dehydrogenase, mitochondrial OS=Mus musculus OX=10090 GN=Acadl PE=1 SV=1	FALSE	TRUE	29.5349	11	15	11	1.6705e+08	40.3
High	Q3TFQ8	Alpha-1,4 glucan phosphorylase OS=Mus musculus OX=10090 GN=Pygb PE=2 SV=1	FALSE	TRUE	23.7248	18	20	15	3.81257e+07	42.75
High	Q8BJY1	26S proteasome non-ATPase regulatory subunit 5 OS=Mus musculus OX=10090 GN=Psmd5 PE=1 SV=4	FALSE	TRUE	33.1349	14	17	14	5.77665e+07	46.22
High	P54823	Probable ATP-dependent RNA helicase DDX6 OS=Mus musculus OX=10090 GN=Ddx6 PE=1 SV=1	FALSE	TRUE	28.7785	11	15	11	5.97638e+07	46.32
High	Q8CIJ3	Eukaryotic translation initiation factor 3 subunit B OS=Mus musculus OX=10090 GN=Eif3b PE=2 SV=1	FALSE	TRUE	22.6804	17	17	17	5.12306e+07	41.22
High	O35286	Pre-mRNA-splicing factor ATP-dependent RNA helicase DHX15 OS=Mus musculus OX=10090 GN=Dhx15 PE=1 SV=2	FALSE	TRUE	23.0189	16	19	16	7.59314e+07	47.49
High	P02768	Serum albumin OS=Homo sapiens GN=ALB PE=1 SV=2	TRUE	FALSE	24.4663	15	40	9	4.91908e+07	87.38
High	P47856	Glutamine--fructose-6-phosphate aminotransferase [isomerizing] 1 OS=Mus musculus OX=10090 GN=Gfpt1 PE=1 SV=3	FALSE	TRUE	28.264	15	18	15	2.71081e+07	46.77
High	Q8R3N1	Nucleolar protein 14 OS=Mus musculus OX=10090 GN=Nop14 PE=1 SV=2	FALSE	TRUE	23.1395	16	19	16	4.9452e+07	43.45
High	Q922Q8	Leucine-rich repeat-containing protein 59 OS=Mus musculus OX=10090 GN=Lrrc59 PE=1 SV=1	FALSE	TRUE	39.7394	10	16	10	5.19119e+08	48.12
High	Q3THQ5	Uncharacterized protein OS=Mus musculus OX=10090 GN=Stip1 PE=2 SV=1	FALSE	TRUE	36.0958	16	21	16	1.68908e+08	56.67
High	P19013	Keratin, type II cytoskeletal 4 OS=Homo sapiens GN=KRT4 PE=1 SV=4	TRUE	FALSE	31.6479	16	23	11	4.69221e+07	54.59
High	Q9CQ65	S-methyl-5'-thioadenosine phosphorylase OS=Mus musculus OX=10090 GN=Mtap PE=1 SV=1	FALSE	TRUE	56.5371	11	16	11	7.7999e+07	45.11
High	Q5EBP9	Tripartite motif-containing 28 OS=Mus musculus OX=10090 GN=Trim28 PE=2 SV=1	FALSE	TRUE	28.777	13	21	13	1.37392e+08	64.93
High	A0A0R4J0I9	Prolow-density lipoprotein receptor-related protein 1 OS=Mus musculus OX=10090 GN=Lrp1 PE=1 SV=1	FALSE	TRUE	5.61056	22	23	21	2.6038e+07	47.49
High	Q62351	Transferrin receptor protein 1 OS=Mus musculus OX=10090 GN=Tfrc PE=1 SV=1	FALSE	TRUE	25.2949	17	19	17	5.9993e+07	48.02
High	P01831	Thy-1 membrane glycoprotein OS=Mus musculus OX=10090 GN=Thy1 PE=1 SV=1	FALSE	TRUE	32.716	6	25	6	1881184349	79.4
High	P10630	Eukaryotic initiation factor 4A-II OS=Mus musculus OX=10090 GN=Eif4a2 PE=1 SV=2	FALSE	TRUE	32.1867	13	26	3	2.20103e+07	66.75
High	Q544Y7	Cofilin 1, non-muscle OS=Mus musculus OX=10090 GN=Cfl1 PE=2 SV=1	FALSE	TRUE	77.7108	12	21	9	6.97219e+08	63.67
High	Q3TIA9	Glutamine amidotransferase type-2 domain-containing protein OS=Mus musculus OX=10090 GN=Asns PE=2 SV=1	FALSE	TRUE	31.9073	15	17	15	1.65925e+08	45.38
High	Q3UF16	Uncharacterized protein OS=Mus musculus OX=10090 GN=P4ha1 PE=2 SV=1	FALSE	TRUE	23.7077	13	19	3	2.36544e+07	48.39
High	Q91V41	Ras-related protein Rab-14 OS=Mus musculus OX=10090 GN=Rab14 PE=1 SV=3	FALSE	TRUE	76.2791	12	17	2	76457376	51.16
High	E9QK89	Mediator of DNA damage checkpoint protein 1 OS=Mus musculus OX=10090 GN=Mdc1 PE=1 SV=1	FALSE	TRUE	14.4614	16	19	16	7.99997e+07	45.34
High	Q6PB66	Leucine-rich PPR motif-containing protein, mitochondrial OS=Mus musculus OX=10090 GN=Lrpprc PE=1 SV=2	FALSE	TRUE	15.158	21	22	21	5.55742e+07	51.12
High	Q9ER67	Maged2 protein OS=Mus musculus OX=10090 GN=Maged2 PE=1 SV=1	FALSE	TRUE	32.4675	14	17	13	1.07117e+08	48.25
High	Q9QZE5	Coatomer subunit gamma-1 OS=Mus musculus OX=10090 GN=Copg1 PE=1 SV=1	FALSE	TRUE	25.286	16	18	14	6.56516e+07	45.69
High	Q50HX0	RAB14 protein OS=Mus musculus OX=10090 GN=Rab14 PE=2 SV=1	FALSE	TRUE	72.5581	12	17	2		52.98
High	Q9DCW4	Electron transfer flavoprotein subunit beta OS=Mus musculus OX=10090 GN=Etfb PE=1 SV=3	FALSE	TRUE	52.1569	12	17	12	2.37625e+08	44.38
High	Q3KQJ3	H2-D1 protein (Fragment) OS=Mus musculus OX=10090 GN=H2-D1 PE=2 SV=1	FALSE	TRUE	39.3586	12	16	10	1.03552e+08	47.5
High	P54754	Ephrin type-B receptor 3 OS=Mus musculus OX=10090 GN=Ephb3 PE=1 SV=2	FALSE	TRUE	21.148	16	16	12	4.0126e+07	42.67
High	Q8R1B4	Eukaryotic translation initiation factor 3 subunit C OS=Mus musculus OX=10090 GN=Eif3c PE=1 SV=1	FALSE	TRUE	18.4413	15	19	15	5.6348e+07	54.11
High	Q99PT1	Rho GDP-dissociation inhibitor 1 OS=Mus musculus OX=10090 GN=Arhgdia PE=1 SV=3	FALSE	TRUE	50	8	15	8	1.4174e+08	43.68
High	O35643	AP-1 complex subunit beta-1 OS=Mus musculus OX=10090 GN=Ap1b1 PE=1 SV=2	FALSE	TRUE	18.0276	16	18	5	2.51113e+07	41.3
High	Q8BWT1	3-ketoacyl-CoA thiolase, mitochondrial OS=Mus musculus OX=10090 GN=Acaa2 PE=1 SV=3	FALSE	TRUE	42.8212	12	16	12	1.09046e+08	43.13
High	P17918	Proliferating cell nuclear antigen OS=Mus musculus OX=10090 GN=Pcna PE=1 SV=2	FALSE	TRUE	52.8736	12	17	12	5.12727e+08	42.47
High	Q9CQV8	14-3-3 protein beta/alpha OS=Mus musculus OX=10090 GN=Ywhab PE=1 SV=3	FALSE	TRUE	57.7236	12	23	6	2.95691e+08	60.74
High	Q91ZW3	SWI/SNF-related matrix-associated actin-dependent regulator of chromatin subfamily A member 5 OS=Mus musculus OX=10090 GN=Smarca5 PE=1 SV=1	FALSE	TRUE	20.4567	20	21	20	5.30998e+07	43.64
High	Q5YLW3	Ribosomal protein S3 OS=Mus musculus OX=10090 GN=Rps3 PE=1 SV=1	FALSE	TRUE	64.6091	15	28	15	4.0082e+08	75.31
High	Q3TI05	Chaperonin containing Tcp1, subunit 6a (Zeta) OS=Mus musculus OX=10090 GN=Cct6a PE=2 SV=1	FALSE	TRUE	33.71	17	24	17	2.19458e+08	58.24
High	E9PWW9	Remodeling and spacing factor 1 OS=Mus musculus OX=10090 GN=Rsf1 PE=1 SV=2	FALSE	TRUE	13.0465	14	14	14	3.89792e+07	40.29
High	Q61164	Transcriptional repressor CTCF OS=Mus musculus OX=10090 GN=Ctcf PE=1 SV=2	FALSE	TRUE	23.913	15	20	15	2.77246e+08	46.07
High	Q3TF14	Adenosylhomocysteinase OS=Mus musculus OX=10090 GN=Ahcy PE=1 SV=1	FALSE	TRUE	36.3426	14	17	13	1.47921e+08	42.76
High	P68510	14-3-3 protein eta OS=Mus musculus OX=10090 GN=Ywhah PE=1 SV=2	FALSE	TRUE	49.187	12	18	8	1.86155e+08	47.03
High	Q3TF87	AA_TRNA_LIGASE_II domain-containing protein OS=Mus musculus OX=10090 GN=Dars PE=2 SV=1	FALSE	TRUE	37.1257	16	19	16	5.54099e+07	46.41
High	Q80WJ7	Protein LYRIC OS=Mus musculus OX=10090 GN=Mtdh PE=1 SV=1	FALSE	TRUE	32.2971	16	21	16	8.9073e+07	49.23
High	P01966	Hemoglobin subunit alpha OS=Bos taurus GN=HBA PE=1 SV=2	TRUE	FALSE	57.0423	6	25	3	9.33616e+08	71.07
High	Q3TRJ1	Vacuolar protein sorting-associated protein 35 OS=Mus musculus OX=10090 GN=Vps35 PE=1 SV=1	FALSE	TRUE	22.1106	16	20	16	7.76376e+07	47.83
High	P24788	Cyclin-dependent kinase 11B OS=Mus musculus OX=10090 GN=Cdk11b PE=1 SV=2	FALSE	TRUE	25.2551	19	22	18	1.58826e+08	56.99
High	P10853	Histone H2B type 1-F/J/L OS=Mus musculus OX=10090 GN=H2bc7 PE=1 SV=2	FALSE	TRUE	57.1429	10	62	10	2.27896e+10	125.02
High	P21956	Lactadherin OS=Mus musculus OX=10090 GN=Mfge8 PE=1 SV=3	FALSE	TRUE	31.3175	12	15	12	9.07148e+07	37.94
High	Q8BT90	Uncharacterized protein (Fragment) OS=Mus musculus OX=10090 GN=Rps17 PE=2 SV=1	FALSE	TRUE	48.227	7	18	7	524716308	47.94
High	A0A140LHU0	Disintegrin and metalloproteinase domain-containing protein 9 OS=Mus musculus OX=10090 GN=Adam9 PE=1 SV=1	FALSE	TRUE	23.5226	15	16	15	1.76621e+08	39.33
High	Q3TIU8	Uncharacterized protein OS=Mus musculus OX=10090 GN=Abce1 PE=2 SV=1	FALSE	TRUE	27.5459	14	18	14	8.59416e+07	45.25
High	Q3UDE2	Tubulin--tyrosine ligase-like protein 12 OS=Mus musculus OX=10090 GN=Ttll12 PE=1 SV=1	FALSE	TRUE	30.2034	15	17	15	7.44112e+07	41.75
High	Q9CPN8	Insulin-like growth factor 2 mRNA-binding protein 3 OS=Mus musculus OX=10090 GN=Igf2bp3 PE=1 SV=1	FALSE	TRUE	28.152	13	15	11	1.32834e+08	39.66
High	Q9Z1Z0	General vesicular transport factor p115 OS=Mus musculus OX=10090 GN=Uso1 PE=1 SV=2	FALSE	TRUE	23.2534	15	18	15	5.0361e+07	50.03
High	E9Q1G8	Septin 7 OS=Mus musculus OX=10090 GN=Sept7 PE=1 SV=2	FALSE	TRUE	29.0618	12	16	11	3.73162e+08	41.15
High	P00698	Lysozyme C OS=Gallus gallus GN=LYZ PE=1 SV=1	TRUE	FALSE	74.1497	9	80	9	1.30198e+10	208.55
High	P97371	Proteasome activator complex subunit 1 OS=Mus musculus OX=10090 GN=Psme1 PE=1 SV=2	FALSE	TRUE	50.6024	12	13	12	1.14609e+08	39.38
High	Q3V122	DNA replication licensing factor MCM7 OS=Mus musculus OX=10090 GN=Mcm7 PE=2 SV=1	FALSE	TRUE	24.8611	14	16	14	7.21748e+07	41.21
High	Q99P72	Reticulon-4 OS=Mus musculus OX=10090 GN=Rtn4 PE=1 SV=2	FALSE	TRUE	14.716	9	19	9	3.70037e+08	57.21
High	Q99L45	Eukaryotic translation initiation factor 2 subunit 2 OS=Mus musculus OX=10090 GN=Eif2s2 PE=1 SV=1	FALSE	TRUE	40.7855	11	14	11	8.19827e+07	36.74
High	A0A1L1STE4	Interleukin enhancer-binding factor 3 OS=Mus musculus OX=10090 GN=Ilf3 PE=1 SV=1	FALSE	TRUE	20.9251	17	19	17	1.1949e+08	41.75
High	Q5U4C3	Splicing factor, arginine/serine-rich 19 OS=Mus musculus OX=10090 GN=Scaf1 PE=1 SV=1	FALSE	TRUE	12.5796	13	18	13	8.90681e+07	48.74
High	P70333	Heterogeneous nuclear ribonucleoprotein H2 OS=Mus musculus OX=10090 GN=Hnrnph2 PE=1 SV=1	FALSE	TRUE	35.8575	12	24	5	3.50439e+07	51.8
High	P57776	Elongation factor 1-delta OS=Mus musculus OX=10090 GN=Eef1d PE=1 SV=3	FALSE	TRUE	39.1459	8	13	1	4.26229e+08	42.11
High	A0A1B0GSX0	L-lactate dehydrogenase OS=Mus musculus OX=10090 GN=Ldha PE=1 SV=1	FALSE	TRUE	38.2271	13	19	13	3.8045e+08	38.99
High	P28656	Nucleosome assembly protein 1-like 1 OS=Mus musculus OX=10090 GN=Nap1l1 PE=1 SV=2	FALSE	TRUE	22.2506	7	16	6	9.83894e+07	38.41
High	ENSEMBL:ENSBTAP00000024466	(Bos taurus) 44 kDa protein [OS=Bos taurus]	TRUE	FALSE	24.6883	8	18	1	991800412	54.27
High	Q3U1C2	RuvB-like helicase OS=Mus musculus OX=10090 GN=Ruvbl1 PE=1 SV=1	FALSE	TRUE	34.6491	11	14	11	7.45204e+07	38.43
High	Q8BFY9	Transportin-1 OS=Mus musculus OX=10090 GN=Tnpo1 PE=1 SV=2	FALSE	TRUE	18.1514	13	14	8	5.06333e+07	34.99
High	A0A1S6GWH4	SAM_MT_RSMB_NOP domain-containing protein OS=Mus musculus OX=10090 GN=Nsun2 PE=2 SV=1	FALSE	TRUE	23.913	16	19	16	3.97182e+07	43.77
High	Q8CIN4	Serine/threonine-protein kinase PAK 2 OS=Mus musculus OX=10090 GN=Pak2 PE=1 SV=1	FALSE	TRUE	30.7252	12	13	8	3.41226e+07	37.39
High	Q5RJV5	Polypyrimidine tract binding protein 1 OS=Mus musculus OX=10090 GN=Ptbp1 PE=2 SV=1	FALSE	TRUE	25.045	11	17	9	2.53537e+08	46.69
High	A0A0J9YUL3	Septin 11 OS=Mus musculus OX=10090 GN=Sept11 PE=1 SV=1	FALSE	TRUE	37.037	12	17	11	1.00316e+08	48.64
High	P46061	Ran GTPase-activating protein 1 OS=Mus musculus OX=10090 GN=Rangap1 PE=1 SV=2	FALSE	TRUE	25.2971	13	15	13	1.05719e+08	40.02
High	Q3TDF8	eRF1_1 domain-containing protein OS=Mus musculus OX=10090 GN=Etf1 PE=2 SV=1	FALSE	TRUE	31.1213	11	14	11	7.5326e+07	38.59
High	Q9Z0L0	Trophoblast glycoprotein OS=Mus musculus OX=10090 GN=Tpbg PE=1 SV=3	FALSE	TRUE	27.23	9	16	9	2.0148e+08	39.17
High	P09103	Protein disulfide-isomerase OS=Mus musculus OX=10090 GN=P4hb PE=1 SV=2	FALSE	TRUE	29.0766	13	15	13	8.6952e+07	41.89
High	Q4FJN9	Fdps protein OS=Mus musculus OX=10090 GN=Fdps PE=1 SV=1	FALSE	TRUE	34.2776	11	20	11	1.91423e+08	56.13
High	F8WHU5	Sister chromatid cohesion protein PDS5 homolog B OS=Mus musculus OX=10090 GN=Pds5b PE=1 SV=1	FALSE	TRUE	10.559	12	13	11	2.18636e+07	34.63
High	P35550	rRNA 2'-O-methyltransferase fibrillarin OS=Mus musculus OX=10090 GN=Fbl PE=1 SV=2	FALSE	TRUE	37.0031	10	18	10	3.52351e+08	48.75
High	Q6ZWX6	Eukaryotic translation initiation factor 2 subunit 1 OS=Mus musculus OX=10090 GN=Eif2s1 PE=1 SV=3	FALSE	TRUE	49.8413	13	15	13	1.10787e+08	41.98
High	Q542F1	Chloride intracellular channel protein OS=Mus musculus OX=10090 GN=Clic1 PE=1 SV=1	FALSE	TRUE	75.5187	12	15	12	4.53212e+08	41.64
High	Q3ULZ3	Phosphoserine aminotransferase OS=Mus musculus OX=10090 GN=Psat1 PE=2 SV=1	FALSE	TRUE	37.2973	13	20	13	2.25578e+08	49.02
High	Q9ERK4	Exportin-2 OS=Mus musculus OX=10090 GN=Cse1l PE=1 SV=1	FALSE	TRUE	19.7734	18	21	18	6.67695e+07	44.53
High	P12382	ATP-dependent 6-phosphofructokinase, liver type OS=Mus musculus OX=10090 GN=Pfkl PE=1 SV=4	FALSE	TRUE	19.359	11	12	8	3.75087e+07	31.87
High	Q61553	Fascin OS=Mus musculus OX=10090 GN=Fscn1 PE=1 SV=4	FALSE	TRUE	28.6004	12	19	12	3.75856e+08	42.99
High	Q9D281	Protein Noxp20 OS=Mus musculus OX=10090 GN=Fam114a1 PE=1 SV=1	FALSE	TRUE	21.4411	8	12	8	1.80732e+08	32.13
High	P97429	Annexin A4 OS=Mus musculus OX=10090 GN=Anxa4 PE=1 SV=4	FALSE	TRUE	41.3793	12	14	11	2.02949e+08	33.05
High	Q8BK67	Protein RCC2 OS=Mus musculus OX=10090 GN=Rcc2 PE=1 SV=1	FALSE	TRUE	26.5385	11	13	11	8.12529e+07	36.9
High	Q3UIJ2	Tr-type G domain-containing protein OS=Mus musculus OX=10090 GN=Eif2s3x PE=2 SV=1	FALSE	TRUE	31.9915	11	14	11	6.95439e+07	36.65
High	ENSEMBL:ENSBTAP00000024462	(Bos taurus) 47 kDa protein [OS=Bos taurus]	TRUE	FALSE	24.821	8	17	1		51.88
High	Q52L97	Importin subunit alpha OS=Mus musculus OX=10090 GN=Kpna2 PE=1 SV=1	FALSE	TRUE	33.0813	14	16	14	9.51534e+07	40.04
High	P50516	V-type proton ATPase catalytic subunit A OS=Mus musculus OX=10090 GN=Atp6v1a PE=1 SV=2	FALSE	TRUE	24.3112	14	17	14	102464575	35.61
High	Q8C483	Serine--tRNA ligase, cytoplasmic OS=Mus musculus OX=10090 GN=Sars PE=1 SV=1	FALSE	TRUE	21.0821	8	12	8	1.41401e+08	40.37
High	Q9JMA1	Ubiquitin carboxyl-terminal hydrolase 14 OS=Mus musculus OX=10090 GN=Usp14 PE=1 SV=3	FALSE	TRUE	28.6004	12	16	12	4.8512e+07	43.58
High	Q3UJW9	Aldo_ket_red domain-containing protein OS=Mus musculus OX=10090 GN=Akr1a1 PE=2 SV=1	FALSE	TRUE	38.1538	10	15	10	1.24384e+08	44.96
High	Q3U505	Dolichyl-diphosphooligosaccharide--protein glycosyltransferase subunit 2 (Fragment) OS=Mus musculus OX=10090 GN=Rpn2 PE=2 SV=1	FALSE	TRUE	25.9484	11	15	11	9.1691e+07	46.71
High	P80313	T-complex protein 1 subunit eta OS=Mus musculus OX=10090 GN=Cct7 PE=1 SV=1	FALSE	TRUE	28.125	14	18	14	2.04822e+08	42.74
High	Q91V98	Endosialin OS=Mus musculus OX=10090 GN=Cd248 PE=1 SV=1	FALSE	TRUE	20.2614	11	17	11	9.90785e+08	46.02
High	Q8C338	Isocitrate dehydrogenase [NADP] OS=Mus musculus OX=10090 GN=Idh1 PE=2 SV=1	FALSE	TRUE	36.4929	14	16	13	1.42531e+08	38.42
High	Q7Z794	Keratin, type II cytoskeletal 1b OS=Homo sapiens GN=KRT77 PE=2 SV=3	TRUE	FALSE	20.7612	14	41	7	25491734	109.42
High	P19157	Glutathione S-transferase P 1 OS=Mus musculus OX=10090 GN=Gstp1 PE=1 SV=2	FALSE	TRUE	35.7143	5	11	5	1.84981e+08	34.95
High	Q3V1Z7	Uncharacterized protein OS=Mus musculus OX=10090 GN=Ddx1 PE=2 SV=1	FALSE	TRUE	23.7838	15	17	15	8.45148e+07	35.5
High	Q6PHQ9	Polyadenylate-binding protein OS=Mus musculus OX=10090 GN=Pabpc4 PE=1 SV=1	FALSE	TRUE	21.9697	13	14	9	5.17201e+07	37.43
High	G3UY93	Valine--tRNA ligase (Fragment) OS=Mus musculus OX=10090 GN=Vars PE=1 SV=1	FALSE	TRUE	14.241	14	16	14	6.25329e+07	43.07
High	Q6P5F9	Exportin-1 OS=Mus musculus OX=10090 GN=Xpo1 PE=1 SV=1	FALSE	TRUE	14.3791	15	16	15	3.40873e+07	34.94
High	Q3TK29	HATPase_c domain-containing protein OS=Mus musculus OX=10090 GN=Trap1 PE=2 SV=1	FALSE	TRUE	21.5297	13	16	12	8.29986e+08	42.83
High	Q9DB77	Cytochrome b-c1 complex subunit 2, mitochondrial OS=Mus musculus OX=10090 GN=Uqcrc2 PE=1 SV=1	FALSE	TRUE	34.2163	12	14	12	78927560	40.34
High	Q80UG5	Septin-9 OS=Mus musculus OX=10090 GN=Septin9 PE=1 SV=1	FALSE	TRUE	25.0429	13	17	13	1.93623e+08	40.66
High	Q3UK83	Uncharacterized protein OS=Mus musculus OX=10090 GN=Hnrnpa1 PE=2 SV=1	FALSE	TRUE	37.5335	11	17	9	1.86914e+08	43.93
High	Q05D44	Eukaryotic translation initiation factor 5B OS=Mus musculus OX=10090 GN=Eif5b PE=1 SV=2	FALSE	TRUE	15.8717	14	15	14	4.06997e+07	37.45
High	P12035	Keratin, type II cytoskeletal 3 OS=Homo sapiens GN=KRT3 PE=1 SV=3	TRUE	FALSE	13.3758	15	30	2	5.92527e+08	68.32
High	Q3U8D2	TPR_REGION domain-containing protein OS=Mus musculus OX=10090 GN=St13 PE=2 SV=1	FALSE	TRUE	25.6065	9	13	9	2.26313e+08	37.11
High	G5DDB7	Phosphoinositide phospholipase C OS=Mus musculus OX=10090 GN=Plcd1 PE=1 SV=1	FALSE	TRUE	20.3325	12	15	12	1.84452e+07	40.92
High	Q80V08	Rpl17 protein (Fragment) OS=Mus musculus OX=10090 GN=Rpl17 PE=2 SV=1	FALSE	TRUE	42.7835	8	14	8	4.49286e+08	37.65
High	Q3V1E0	Ephrin RBD domain-containing protein OS=Mus musculus OX=10090 GN=Efnb2 PE=2 SV=1	FALSE	TRUE	33.9378	10	13	10	1.12288e+08	38.33
High	Q3UBK2	Uncharacterized protein OS=Mus musculus OX=10090 PE=2 SV=1	FALSE	TRUE	34.4186	10	16	10	6.46041e+08	55.97
High	Q3U8F5	PCI domain-containing protein OS=Mus musculus OX=10090 GN=Psmd12 PE=2 SV=1	FALSE	TRUE	33.3333	12	14	12	5.8557e+07	38.21
High	P48036	Annexin A5 OS=Mus musculus OX=10090 GN=Anxa5 PE=1 SV=1	FALSE	TRUE	40.4389	14	20	14	3.89939e+08	45.69
High	Q61768	Kinesin-1 heavy chain OS=Mus musculus OX=10090 GN=Kif5b PE=1 SV=3	FALSE	TRUE	17.0301	13	14	13	1.51027e+07	38.2
High	P11440	Cyclin-dependent kinase 1 OS=Mus musculus OX=10090 GN=Cdk1 PE=1 SV=3	FALSE	TRUE	51.8519	13	18	12	9.20629e+07	44.49
High	Q9WVA4	Transgelin-2 OS=Mus musculus OX=10090 GN=Tagln2 PE=1 SV=4	FALSE	TRUE	59.2965	11	15	11	2.48332e+08	38.5
High	P28301	Protein-lysine 6-oxidase OS=Mus musculus OX=10090 GN=Lox PE=1 SV=1	FALSE	TRUE	34.0633	10	17	10	1.27979e+08	39.93
High	O35685	Nuclear migration protein nudC OS=Mus musculus OX=10090 GN=Nudc PE=1 SV=1	FALSE	TRUE	39.1566	14	15	14	1.55815e+08	35.78
High	Q32PJ2	Apolipoprotein A-IV OS=Bos taurus GN=APOA4 PE=2 SV=1	TRUE	FALSE	31.5789	12	14	12	133251450	30.43
High	Q3UJ44	Uncharacterized protein OS=Mus musculus OX=10090 GN=Capg PE=2 SV=1	FALSE	TRUE	32.3782	7	13	7	2.84034e+08	41.28
High	E9Q7B0	Prolyl 4-hydroxylase subunit alpha-1 OS=Mus musculus OX=10090 GN=P4ha1 PE=1 SV=1	FALSE	TRUE	26.4317	11	15	1	6.8662e+07	41.41
High	Q3TCP5	FERM domain-containing protein OS=Mus musculus OX=10090 GN=Ezr PE=2 SV=1	FALSE	TRUE	19.1126	13	20	6	3.39483e+08	47.11
High	Q3TGE1	Uncharacterized protein OS=Mus musculus OX=10090 GN=Actr3 PE=2 SV=1	FALSE	TRUE	35.1675	12	15	12	8.95143e+07	40.91
High	P62983	Ubiquitin-40S ribosomal protein S27a OS=Mus musculus OX=10090 GN=Rps27a PE=1 SV=2	FALSE	TRUE	54.4872	8	29	2	6.97106e+07	70.12
High	P07742	Ribonucleoside-diphosphate reductase large subunit OS=Mus musculus OX=10090 GN=Rrm1 PE=1 SV=2	FALSE	TRUE	19.8232	12	12	12	3.88772e+07	32.67
High	Q9JIF0	Protein arginine N-methyltransferase 1 OS=Mus musculus OX=10090 GN=Prmt1 PE=1 SV=1	FALSE	TRUE	34.7709	12	13	12	8.14231e+07	34.59
High	P62827	GTP-binding nuclear protein Ran OS=Mus musculus OX=10090 GN=Ran PE=1 SV=3	FALSE	TRUE	45.3704	9	14	9	8.07208e+08	35.31
High	Q5FWB6	60S acidic ribosomal protein P0 OS=Mus musculus OX=10090 GN=Rplp0 PE=2 SV=1	FALSE	TRUE	38.4858	9	16	9	5.7201e+08	48.85
High	Q3TEA8	Heterochromatin protein 1-binding protein 3 OS=Mus musculus OX=10090 GN=Hp1bp3 PE=1 SV=1	FALSE	TRUE	23.8267	13	17	13	1.58728e+08	40.85
High	Q8CAY6	Acetyl-CoA acetyltransferase, cytosolic OS=Mus musculus OX=10090 GN=Acat2 PE=1 SV=2	FALSE	TRUE	30.2267	8	11	8	5.56361e+07	35.64
High	Q3TGU7	Peptidase_M24 domain-containing protein OS=Mus musculus OX=10090 GN=Pa2g4 PE=1 SV=1	FALSE	TRUE	33.2487	11	13	11	8.65057e+07	35.93
High	P12023	Amyloid-beta A4 protein OS=Mus musculus OX=10090 GN=App PE=1 SV=3	FALSE	TRUE	14.5455	9	12	8	2.3887e+08	27.87
High	P62259	14-3-3 protein epsilon OS=Mus musculus OX=10090 GN=Ywhae PE=1 SV=1	FALSE	TRUE	46.2745	11	19	9	1.13498e+08	49.72
High	Q0PD67	Rab1A OS=Mus musculus OX=10090 GN=Rab1a PE=1 SV=1	FALSE	TRUE	57.561	11	20	6	1.49334e+08	51.35
High	Q3U8Y7	AAA domain-containing protein OS=Mus musculus OX=10090 GN=Psmc3 PE=2 SV=1	FALSE	TRUE	33.8061	10	15	10	3.90159e+07	43.26
High	P49717	DNA replication licensing factor MCM4 OS=Mus musculus OX=10090 GN=Mcm4 PE=1 SV=1	FALSE	TRUE	20.4176	17	20	17	8.1001e+07	50.15
High	Q3UBZ3	F-actin-capping protein subunit alpha OS=Mus musculus OX=10090 GN=Capza2 PE=2 SV=1	FALSE	TRUE	53.8462	10	11	8	9.22733e+07	37.27
High	ENSEMBL:ENSBTAP00000024146	(Bos taurus) similar to alpha-2-macroglobulin isoform 1 [OS=Bos taurus]	TRUE	FALSE	12.1869	16	19	15	4.30354e+08	41.29
High	Q3TQP7	Uncharacterized protein OS=Mus musculus OX=10090 GN=Acat1 PE=2 SV=1	FALSE	TRUE	25.2358	7	12	7	4.95767e+07	37.61
High	P17879	Heat shock 70 kDa protein 1B OS=Mus musculus OX=10090 GN=Hspa1b PE=1 SV=3	FALSE	TRUE	18.2243	8	14	5	2.52158e+07	42.21
High	P97333	Neuropilin-1 OS=Mus musculus OX=10090 GN=Nrp1 PE=1 SV=2	FALSE	TRUE	19.935	14	14	14	6.34557e+07	35.78
High	A0A1S6GWG6	Vacuolar proton pump subunit B OS=Mus musculus OX=10090 GN=Atp6v1b2 PE=2 SV=1	FALSE	TRUE	21.6667	10	13	10	2.54292e+08	34.2
High	P05202	Aspartate aminotransferase, mitochondrial OS=Mus musculus OX=10090 GN=Got2 PE=1 SV=1	FALSE	TRUE	35.5814	14	17	14	2.46824e+08	45.42
High	Q8R1F1	Protein Niban 2 OS=Mus musculus OX=10090 GN=Niban2 PE=1 SV=2	FALSE	TRUE	20.1602	14	16	14	9.30852e+07	34.55
High	O55023	Inositol monophosphatase 1 OS=Mus musculus OX=10090 GN=Impa1 PE=1 SV=1	FALSE	TRUE	38.6282	12	14	12	1.83064e+08	37.63
High	Q8CGK3	Lon protease homolog, mitochondrial OS=Mus musculus OX=10090 GN=Lonp1 PE=1 SV=2	FALSE	TRUE	18.019	15	18	15	4.68861e+07	38.97
High	O08532	Voltage-dependent calcium channel subunit alpha-2/delta-1 OS=Mus musculus OX=10090 GN=Cacna2d1 PE=1 SV=1	FALSE	TRUE	12.9646	12	12	12	2.96646e+07	31.1
High	Q9DCL9	Multifunctional protein ADE2 OS=Mus musculus OX=10090 GN=Paics PE=1 SV=4	FALSE	TRUE	28.7059	12	18	12	6.21048e+07	40.5
High	Q7TQI3	Ubiquitin thioesterase OTUB1 OS=Mus musculus OX=10090 GN=Otub1 PE=1 SV=2	FALSE	TRUE	40.5904	10	15	10	1.53587e+08	35.37
High	Q8K354	Carbonyl reductase [NADPH] 3 OS=Mus musculus OX=10090 GN=Cbr3 PE=1 SV=1	FALSE	TRUE	51.6245	11	13	11	99689229	35.78
High	Q3UAI4	SAP domain-containing protein OS=Mus musculus OX=10090 GN=Sf3b2 PE=2 SV=1	FALSE	TRUE	17.1982	13	14	13	7.0677e+07	34.34
High	Q5XJY5	Coatomer subunit delta OS=Mus musculus OX=10090 GN=Arcn1 PE=1 SV=2	FALSE	TRUE	22.1135	12	14	12	7.65048e+07	31.13
High	Q9CZN7	Serine hydroxymethyltransferase, mitochondrial OS=Mus musculus OX=10090 GN=Shmt2 PE=1 SV=1	FALSE	TRUE	36.1111	17	17	17	8.10747e+07	39.5
High	P53994	Ras-related protein Rab-2A OS=Mus musculus OX=10090 GN=Rab2a PE=1 SV=1	FALSE	TRUE	51.8868	9	11	9	1.22297e+08	29.42
High	Q3TGG2	Ataxin-2-like protein OS=Mus musculus OX=10090 GN=Atxn2l PE=1 SV=1	FALSE	TRUE	17.1026	15	17	15	4.07058e+07	38.08
High	A0A068BFR3	RAS oncogene family protein OS=Mus musculus OX=10090 GN=Rab11b PE=2 SV=1	FALSE	TRUE	56.8807	12	16	12	2.29853e+08	40.83
High	P68871	Hemoglobin subunit beta OS=Homo sapiens GN=HBB PE=1 SV=2	TRUE	FALSE	63.2653	8	12	6	9.20393e+07	36.54
High	P62137	Serine/threonine-protein phosphatase PP1-alpha catalytic subunit OS=Mus musculus OX=10090 GN=Ppp1ca PE=1 SV=1	FALSE	TRUE	33.6364	9	13	2	9.14821e+07	33.82
High	Q3TIV3	Poly [ADP-ribose] polymerase OS=Mus musculus OX=10090 GN=Parp1 PE=2 SV=1	FALSE	TRUE	18.2446	14	15	14	2.62043e+07	39.83
High	A0A0R4J1L2	Elongation factor 1-delta OS=Mus musculus OX=10090 GN=Eef1d PE=1 SV=1	FALSE	TRUE	41.6342	8	12	1	10891179	36.65
High	A8IP69	14-3-3 protein gamma subtype OS=Mus musculus OX=10090 GN=Ywhag PE=1 SV=1	FALSE	TRUE	39.6761	9	19	4	1.73275e+08	42.34
High	P62702	40S ribosomal protein S4, X isoform OS=Mus musculus OX=10090 GN=Rps4x PE=1 SV=2	FALSE	TRUE	44.4867	13	20	13	2.23512e+08	40.58
High	Q61941	NAD(P) transhydrogenase, mitochondrial OS=Mus musculus OX=10090 GN=Nnt PE=1 SV=2	FALSE	TRUE	15.3775	15	18	15	5.06588e+07	39
High	P70206	Plexin-A1 OS=Mus musculus OX=10090 GN=Plxna1 PE=1 SV=1	FALSE	TRUE	8.44773	15	15	11	1.23232e+07	35.38
High	B9EHD2	Oncostatin M receptor OS=Mus musculus OX=10090 GN=Osmr PE=2 SV=1	FALSE	TRUE	12.6543	9	12	9	5.68998e+07	29.71
High	F8VQ93	PH-interacting protein OS=Mus musculus OX=10090 GN=Phip PE=1 SV=1	FALSE	TRUE	7.57825	11	13	11	4.4111e+07	33.51
High	Q3U5L3	PX domain-containing protein OS=Mus musculus OX=10090 GN=Snx2 PE=2 SV=1	FALSE	TRUE	24.2775	10	11	8	2.35646e+07	29.85
High	O70569	Ribosomal protein S14 OS=Mus musculus OX=10090 GN=rps14 PE=3 SV=1	FALSE	TRUE	40.3974	8	16	8	8.45014e+08	49.01
High	Q61490	CD166 antigen OS=Mus musculus OX=10090 GN=Alcam PE=1 SV=3	FALSE	TRUE	21.2693	11	15	11	8.11294e+07	37.04
High	Q9DAM7	Transmembrane protein 263 OS=Mus musculus OX=10090 GN=Tmem263 PE=1 SV=1	FALSE	TRUE	79.1304	6	10	6	1.58946e+08	32.31
High	P10852	4F2 cell-surface antigen heavy chain OS=Mus musculus OX=10090 GN=Slc3a2 PE=1 SV=1	FALSE	TRUE	24.9049	12	14	12	1.71482e+08	31.04
High	A2AFQ2	3-hydroxyacyl-CoA dehydrogenase type-2 OS=Mus musculus OX=10090 GN=Hsd17b10 PE=1 SV=1	FALSE	TRUE	47.9705	9	12	9	6.19393e+07	39.37
High	P54763	Ephrin type-B receptor 2 OS=Mus musculus OX=10090 GN=Ephb2 PE=1 SV=3	FALSE	TRUE	13.8945	10	10	8	2.19214e+07	30.08
High	B2RRH9	Guanine monphosphate synthetase OS=Mus musculus OX=10090 GN=Gmps PE=1 SV=1	FALSE	TRUE	16.8831	10	13	10	3.8262e+07	31.96
High	Q9WV55	Vesicle-associated membrane protein-associated protein A OS=Mus musculus OX=10090 GN=Vapa PE=1 SV=2	FALSE	TRUE	39.3574	10	16	9	1.36332e+08	43.88
High	O54819	Tissue factor pathway inhibitor OS=Mus musculus OX=10090 GN=Tfpi PE=2 SV=1	FALSE	TRUE	36.6013	10	14	10	2.03477e+08	35.63
High	Q9ER72	Cysteine--tRNA ligase, cytoplasmic OS=Mus musculus OX=10090 GN=Cars PE=1 SV=2	FALSE	TRUE	18.2912	13	14	9	4.90641e+07	31.88
High	P24369	Peptidyl-prolyl cis-trans isomerase B OS=Mus musculus OX=10090 GN=Ppib PE=1 SV=2	FALSE	TRUE	47.2222	10	19	10	2.7055e+08	50.68
High	P34955	Alpha-1-antiproteinase OS=Bos taurus GN=SERPINA1 PE=1 SV=1	TRUE	FALSE	32.9327	15	18	15	6.17785e+08	38.36
High	P02070	Hemoglobin subunit beta OS=Bos taurus GN=HBB PE=1 SV=1	TRUE	FALSE	68.9655	9	14	8	2.1983e+08	34.04
High	A0A345IT93	Envelope polyprotein (Fragment) OS=Mus musculus OX=10090 GN=env PE=4 SV=1	FALSE	TRUE	16.6969	7	14	3	4.13162e+08	39.35
High	Q91YR1	Twinfilin-1 OS=Mus musculus OX=10090 GN=Twf1 PE=1 SV=2	FALSE	TRUE	29.4286	10	11	8	1.49632e+08	33.55
High	P99027	60S acidic ribosomal protein P2 OS=Mus musculus OX=10090 GN=Rplp2 PE=1 SV=3	FALSE	TRUE	70.4348	7	11	7	253589677	39.34
High	Q9CZ30	Obg-like ATPase 1 OS=Mus musculus OX=10090 GN=Ola1 PE=1 SV=1	FALSE	TRUE	31.0606	10	14	10	167787879	40.94
High	P63087	Serine/threonine-protein phosphatase PP1-gamma catalytic subunit OS=Mus musculus OX=10090 GN=Ppp1cc PE=1 SV=1	FALSE	TRUE	35.9133	9	12	2	3.09876e+07	32.24
High	Q9D0I9	Arginine--tRNA ligase, cytoplasmic OS=Mus musculus OX=10090 GN=Rars PE=1 SV=2	FALSE	TRUE	24.697	15	16	15	3.5824e+07	36.42
High	Q3TWN8	Delta-1-pyrroline-5-carboxylate synthase OS=Mus musculus OX=10090 GN=Aldh18a1 PE=2 SV=1	FALSE	TRUE	15.7233	11	15	11	5.00088e+07	44.8
High	A0A0R4J0H7	Condensin complex subunit 1 OS=Mus musculus OX=10090 GN=Ncapd2 PE=1 SV=1	FALSE	TRUE	12.4282	13	13	13	2.24005e+07	28.79
High	Q3U111	FERM domain-containing protein (Fragment) OS=Mus musculus OX=10090 GN=Rdx PE=2 SV=1	FALSE	TRUE	14.8036	11	18	2	8.35592e+06	44.16
High	G5E866	Splicing factor 3B subunit 1 OS=Mus musculus OX=10090 GN=Sf3b1 PE=1 SV=1	FALSE	TRUE	12.8834	12	14	12	3.58708e+07	32.57
High	Q5D862	Filaggrin-2 OS=Homo sapiens GN=FLG2 PE=1 SV=1	TRUE	FALSE	5.688	8	13	8	1.08224e+08	33.72
High	Q3U8X1	Eukaryotic translation initiation factor 3 subunit F OS=Mus musculus OX=10090 GN=Eif3f PE=2 SV=1	FALSE	TRUE	27.4238	8	11	8	91797311	31.68
High	A0A0R4J0G0	Phosphoenolpyruvate carboxykinase [GTP], mitochondrial OS=Mus musculus OX=10090 GN=Pck2 PE=1 SV=1	FALSE	TRUE	20.6897	11	12	11	4.82286e+07	32.55
High	Q7TSJ0	DNA (cytosine-5)-methyltransferase OS=Mus musculus OX=10090 GN=Dnmt1 PE=2 SV=1	FALSE	TRUE	8.11309	10	11	10	3.21736e+07	33.6
High	O35598	Disintegrin and metalloproteinase domain-containing protein 10 OS=Mus musculus OX=10090 GN=Adam10 PE=1 SV=2	FALSE	TRUE	20.6943	11	13	11	9.74886e+07	32.17
High	A2A4U6	Zinc finger protein 334 OS=Mus musculus OX=10090 GN=Zfp334 PE=4 SV=1	FALSE	TRUE	15.4639	9	11	9	6.88581e+07	31
High	Q9DAW9	Calponin-3 OS=Mus musculus OX=10090 GN=Cnn3 PE=1 SV=1	FALSE	TRUE	33.0303	8	10	7	2.52034e+08	32.53
High	P48962	ADP/ATP translocase 1 OS=Mus musculus OX=10090 GN=Slc25a4 PE=1 SV=4	FALSE	TRUE	47.651	16	18	10	2.10019e+08	36.11
High	Q3SZV7	Hemopexin OS=Bos taurus GN=HPX PE=2 SV=1	TRUE	FALSE	25.0545	10	15	10	2.61156e+08	40.41
High	P57722	Poly(rC)-binding protein 3 OS=Mus musculus OX=10090 GN=Pcbp3 PE=1 SV=3	FALSE	TRUE	21.0243	6	15	1		47.16
High	Q8CI59	Metalloreductase STEAP3 OS=Mus musculus OX=10090 GN=Steap3 PE=1 SV=1	FALSE	TRUE	22.9508	9	14	9	9.36216e+07	40.79
High	O54890	Integrin beta-3 OS=Mus musculus OX=10090 GN=Itgb3 PE=1 SV=2	FALSE	TRUE	14.8666	10	12	10	4.68884e+07	29.95
High	Q80W68	Kin of IRRE-like protein 1 OS=Mus musculus OX=10090 GN=Kirrel1 PE=1 SV=1	FALSE	TRUE	15.0824	9	11	9	4.84527e+07	30
High	Q3UL54	Uncharacterized protein OS=Mus musculus OX=10090 GN=Rsl1d1 PE=2 SV=1	FALSE	TRUE	27.3118	11	15	11	9.35859e+07	43.16
High	A0A087WQS2	Basic leucine zipper and W2 domain-containing protein 1 OS=Mus musculus OX=10090 GN=Bzw1 PE=1 SV=1	FALSE	TRUE	25.0554	13	15	10	1.42327e+08	37.5
High	Q3U9U5	Uncharacterized protein OS=Mus musculus OX=10090 GN=Bcap31 PE=2 SV=1	FALSE	TRUE	25.7143	8	11	8	69049909	34.02
High	Q3TPZ5	Uncharacterized protein OS=Mus musculus OX=10090 GN=Dctn2 PE=1 SV=1	FALSE	TRUE	36.0697	12	12	12	33738066	29.11
High	Q9QZM0	Ubiquilin-2 OS=Mus musculus OX=10090 GN=Ubqln2 PE=1 SV=2	FALSE	TRUE	15.047	7	12	4	24903346	37.18
High	O35841	Apoptosis inhibitor 5 OS=Mus musculus OX=10090 GN=Api5 PE=1 SV=2	FALSE	TRUE	24.4048	11	13	11	8.33638e+07	32.74
High	A2AUD5	Tumor protein D54 OS=Mus musculus OX=10090 GN=Tpd52l2 PE=1 SV=1	FALSE	TRUE	44.1048	9	9	9	6.74697e+07	25.89
High	Q3TJG1	Platelet-activating factor acetylhydrolase IB subunit alpha OS=Mus musculus OX=10090 GN=Pafah1b1 PE=2 SV=1	FALSE	TRUE	28.2927	9	12	8	8.52572e+07	30.92
High	G3X956	SPT16, facilitates chromatin-remodeling subunit OS=Mus musculus OX=10090 GN=Supt16 PE=1 SV=1	FALSE	TRUE	12.894	11	11	11	3.76099e+07	31.49
High	Q8C7R4	Ubiquitin-like modifier-activating enzyme 6 OS=Mus musculus OX=10090 GN=Uba6 PE=1 SV=1	FALSE	TRUE	13.6752	12	13	12	1.93283e+07	30
High	P54761	Ephrin type-B receptor 4 OS=Mus musculus OX=10090 GN=Ephb4 PE=1 SV=2	FALSE	TRUE	14.1844	13	14	9	19330563	34.83
High	Q8K009	Mitochondrial 10-formyltetrahydrofolate dehydrogenase OS=Mus musculus OX=10090 GN=Aldh1l2 PE=1 SV=2	FALSE	TRUE	15.0596	10	12	10	1.60723e+07	30.37
High	Q80TP8	MKIAA0885 protein (Fragment) OS=Mus musculus OX=10090 GN=Csde1 PE=2 SV=1	FALSE	TRUE	17.1533	13	13	13	4.94358e+07	32.77
High	Q3UPU8	Uncharacterized protein OS=Mus musculus OX=10090 GN=Acaa1a PE=2 SV=1	FALSE	TRUE	24.0566	7	10	7	1.6804e+07	30.38
High	Q5DTI2	MKIAA4195 protein (Fragment) OS=Mus musculus OX=10090 GN=Atp2a2 PE=2 SV=1	FALSE	TRUE	12.5353	11	13	11	3.04924e+07	33.72
High	Q9CXW3	Calcyclin-binding protein OS=Mus musculus OX=10090 GN=Cacybp PE=1 SV=1	FALSE	TRUE	26.6376	7	11	7	1.22077e+08	31.48
High	ENSEMBL:ENSBTAP00000016046	(Bos taurus) similar to fibulin-1 C isoform 1 [OS=Bos taurus]	TRUE	FALSE	14.5892	9	10	9	4.89697e+07	20.12
High	Q60932	Voltage-dependent anion-selective channel protein 1 OS=Mus musculus OX=10090 GN=Vdac1 PE=1 SV=3	FALSE	TRUE	42.2297	10	12	1	2.44456e+08	33.89
High	Q00PI9	Heterogeneous nuclear ribonucleoprotein U-like protein 2 OS=Mus musculus OX=10090 GN=Hnrnpul2 PE=1 SV=2	FALSE	TRUE	14.4966	9	13	9	4.41673e+07	34.5
High	Q7TNC4	Putative RNA-binding protein Luc7-like 2 OS=Mus musculus OX=10090 GN=Luc7l2 PE=1 SV=1	FALSE	TRUE	32.398	11	11	7	62498354	30.78
High	Q14AI7	COP9 (Constitutive photomorphogenic) homolog, subunit 4 (Arabidopsis thaliana) OS=Mus musculus OX=10090 GN=Cops4 PE=1 SV=1	FALSE	TRUE	28.0788	10	12	10	4.16934e+07	24.62
High	Q8CI51	PDZ and LIM domain protein 5 OS=Mus musculus OX=10090 GN=Pdlim5 PE=1 SV=4	FALSE	TRUE	26.7343	12	13	12	2.2097e+07	29.98
High	C7G3P2	MKIAA0536 protein (Fragment) OS=Mus musculus OX=10090 GN=Prpf4b PE=2 SV=1	FALSE	TRUE	11.6716	11	13	11	1.31002e+08	34.68
High	Q91W90	Thioredoxin domain-containing protein 5 OS=Mus musculus OX=10090 GN=Txndc5 PE=1 SV=2	FALSE	TRUE	27.3381	9	11	9	4.09786e+07	25.9
High	Q3TJ01	tRNA-splicing ligase RtcB homolog OS=Mus musculus OX=10090 GN=Rtcb PE=2 SV=1	FALSE	TRUE	23.9604	10	13	10	5.22428e+07	35.75
High	E9PUD2	Dynamin-1-like protein OS=Mus musculus OX=10090 GN=Dnm1l PE=1 SV=1	FALSE	TRUE	24.0169	13	13	13	2.0422e+07	33.06
High	Q9JKR6	Hypoxia up-regulated protein 1 OS=Mus musculus OX=10090 GN=Hyou1 PE=1 SV=1	FALSE	TRUE	14.7147	12	16	12	5.01792e+07	41.37
High	F8VQC1	Signal recognition particle subunit SRP72 OS=Mus musculus OX=10090 GN=Srp72 PE=1 SV=1	FALSE	TRUE	18.0328	10	12	10	7.67944e+07	34.83
High	Q8C243	Peptidase A1 domain-containing protein OS=Mus musculus OX=10090 GN=Ctsd PE=2 SV=1	FALSE	TRUE	23.3708	7	11	6	68180913	30.98
High	A0JNY7	Eukaryotic translation initiation factor 4, gamma 2 OS=Mus musculus OX=10090 GN=Eif4g2 PE=2 SV=1	FALSE	TRUE	16.9978	14	15	14	2.24657e+07	33.38
High	Q544R5	TDP-43 variant 1 OS=Mus musculus OX=10090 GN=Tardbp PE=1 SV=1	FALSE	TRUE	21.0145	8	10	8	2.40374e+08	31.88
High	P16110	Galectin-3 OS=Mus musculus OX=10090 GN=Lgals3 PE=1 SV=3	FALSE	TRUE	26.5152	6	17	6	2.0355e+08	38.28
High	P63085	Mitogen-activated protein kinase 1 OS=Mus musculus OX=10090 GN=Mapk1 PE=1 SV=3	FALSE	TRUE	34.3575	12	15	8	142801489	38.1
High	Q9R0E2	Procollagen-lysine,2-oxoglutarate 5-dioxygenase 1 OS=Mus musculus OX=10090 GN=Plod1 PE=1 SV=1	FALSE	TRUE	18.544	10	11	10	5.25107e+07	29.58
High	O35375	Neuropilin-2 OS=Mus musculus OX=10090 GN=Nrp2 PE=1 SV=2	FALSE	TRUE	13.8561	12	14	12	3.44284e+07	30.75
High	Q3THL7	Uncharacterized protein OS=Mus musculus OX=10090 GN=Vdac1 PE=2 SV=1	FALSE	TRUE	44.1696	10	12	1	3.71753e+07	33.23
High	Q544G5	Uncharacterized protein OS=Mus musculus OX=10090 GN=Dag1 PE=1 SV=1	FALSE	TRUE	11.7581	8	10	8	8.38247e+07	23.94
High	G3UWC2	N-acetylated-alpha-linked acidic dipeptidase 2 OS=Mus musculus OX=10090 GN=Naalad2 PE=1 SV=1	FALSE	TRUE	16.4524	11	12	11	6.15407e+07	31.07
High	Q921F4	Heterogeneous nuclear ribonucleoprotein L-like OS=Mus musculus OX=10090 GN=Hnrnpll PE=1 SV=3	FALSE	TRUE	20.643	9	12	9	3.42469e+07	32.21
High	Q9CPY7	Cytosol aminopeptidase OS=Mus musculus OX=10090 GN=Lap3 PE=1 SV=3	FALSE	TRUE	24.6628	10	10	10	5.72723e+07	29
High	E9PV22	Leucine-rich repeat-containing protein 47 OS=Mus musculus OX=10090 GN=Lrrc47 PE=1 SV=1	FALSE	TRUE	19.2371	10	12	10	25494250	27.38
High	O35074	Prostacyclin synthase OS=Mus musculus OX=10090 GN=Ptgis PE=1 SV=1	FALSE	TRUE	26.9461	11	14	11	6.05196e+07	29.9
High	Q3TN61	Uncharacterized protein OS=Mus musculus OX=10090 GN=Rhoa PE=2 SV=1	FALSE	TRUE	37.3057	7	13	1	1.74043e+08	36.14
High	Q5I0T8	Ribosomal protein L19 OS=Mus musculus OX=10090 GN=Rpl19 PE=1 SV=1	FALSE	TRUE	22.9592	6	11	6	1.05044e+09	34.29
High	P70698	CTP synthase 1 OS=Mus musculus OX=10090 GN=Ctps1 PE=1 SV=2	FALSE	TRUE	18.9509	10	11	9	5.33087e+07	28.77
High	Q3TG52	Aldedh domain-containing protein OS=Mus musculus OX=10090 GN=Aldh9a1 PE=2 SV=1	FALSE	TRUE	21.0425	9	12	9	6.16664e+07	31.74
High	Q8C6A3	Uncharacterized protein OS=Mus musculus OX=10090 GN=Prep PE=2 SV=1	FALSE	TRUE	19.2886	11	11	11	4.42722e+08	28.68
High	A1A4T2	Alpha glucosidase 2 alpha neutral subunit OS=Mus musculus OX=10090 GN=Ganab PE=2 SV=1	FALSE	TRUE	15.528	14	14	14	4.65047e+07	31.95
High	B2RRX2	Serine/threonine-protein phosphatase OS=Mus musculus OX=10090 GN=Ppp3ca PE=2 SV=1	FALSE	TRUE	20.9213	10	11	1	33672968	27.61
High	Q61584	Fragile X mental retardation syndrome-related protein 1 OS=Mus musculus OX=10090 GN=Fxr1 PE=1 SV=2	FALSE	TRUE	20.9749	11	13	9	2.29018e+07	34.23
High	Q91XV3	Brain acid soluble protein 1 OS=Mus musculus OX=10090 GN=Basp1 PE=1 SV=3	FALSE	TRUE	63.7168	8	9	8	8.22215e+07	35.08
High	Q3TNL1	Glucose-6-phosphate 1-dehydrogenase OS=Mus musculus OX=10090 GN=G6pdx PE=2 SV=1	FALSE	TRUE	29.1262	14	16	14	1.64473e+08	34.02
High	Q6P542	ATP-binding cassette sub-family F member 1 OS=Mus musculus OX=10090 GN=Abcf1 PE=1 SV=1	FALSE	TRUE	17.2043	12	13	11	6.03521e+07	33.2
High	Q9D2R0	Acetoacetyl-CoA synthetase OS=Mus musculus OX=10090 GN=Aacs PE=1 SV=1	FALSE	TRUE	17.1131	10	12	10	5.888e+07	32.5
High	Q9EPU0	Regulator of nonsense transcripts 1 OS=Mus musculus OX=10090 GN=Upf1 PE=1 SV=2	FALSE	TRUE	11.032	12	12	12	50389347	27.72
High	Q9Z1F9	SUMO-activating enzyme subunit 2 OS=Mus musculus OX=10090 GN=Uba2 PE=1 SV=1	FALSE	TRUE	20.2194	11	11	11	5.51965e+07	29.79
High	O88990	Alpha-actinin-3 OS=Mus musculus OX=10090 GN=Actn3 PE=2 SV=1	FALSE	TRUE	11.6667	10	14	1		38.81
High	Q03145	Ephrin type-A receptor 2 OS=Mus musculus OX=10090 GN=Epha2 PE=1 SV=3	FALSE	TRUE	12.999	12	13	10	3.28142e+07	23.11
High	Q80X50	Ubiquitin-associated protein 2-like OS=Mus musculus OX=10090 GN=Ubap2l PE=1 SV=1	FALSE	TRUE	11.3821	10	13	10	4.79598e+07	34.47
High	P70372	ELAV-like protein 1 OS=Mus musculus OX=10090 GN=Elavl1 PE=1 SV=2	FALSE	TRUE	33.1288	9	13	9	2.50316e+08	34
High	O70194	Eukaryotic translation initiation factor 3 subunit D OS=Mus musculus OX=10090 GN=Eif3d PE=1 SV=2	FALSE	TRUE	24.8175	11	13	11	6.64374e+07	28.84
High	Q3U4H0	Uncharacterized protein OS=Mus musculus OX=10090 GN=Mapre1 PE=1 SV=1	FALSE	TRUE	38.0597	7	9	6	9.00903e+07	27.58
High	O55222	Integrin-linked protein kinase OS=Mus musculus OX=10090 GN=Ilk PE=1 SV=2	FALSE	TRUE	24.7788	11	14	11	4.17231e+07	24.62
High	Q61576	Peptidyl-prolyl cis-trans isomerase FKBP10 OS=Mus musculus OX=10090 GN=Fkbp10 PE=1 SV=2	FALSE	TRUE	24.957	13	13	12	7.54641e+07	29.79
High	A0A2C9F2D2	Annexin OS=Mus musculus OX=10090 GN=Anxa7 PE=1 SV=1	FALSE	TRUE	20	9	11	9	9.05284e+07	25.46
High	Q8K411	Presequence protease, mitochondrial OS=Mus musculus OX=10090 GN=Pitrm1 PE=1 SV=1	FALSE	TRUE	12.1622	10	12	10	3.27924e+07	29.59
High	F6R6P2	Epsilon-sarcoglycan OS=Mus musculus OX=10090 GN=Sgce PE=1 SV=2	FALSE	TRUE	16.7043	6	12	6	1.47838e+08	30.39
High	Q3U7V7	Profilin OS=Mus musculus OX=10090 GN=Pfn1 PE=2 SV=1	FALSE	TRUE	55	7	17	7	5.08175e+08	34.75
High	P17426	AP-2 complex subunit alpha-1 OS=Mus musculus OX=10090 GN=Ap2a1 PE=1 SV=1	FALSE	TRUE	11.259	10	13	3	1.34107e+07	30.35
High	P35922	Synaptic functional regulator FMR1 OS=Mus musculus OX=10090 GN=Fmr1 PE=1 SV=1	FALSE	TRUE	20.1954	10	12	8	3.35535e+07	31.57
High	Q3UQ08	Unc5c protein OS=Mus musculus OX=10090 GN=Unc5c PE=2 SV=1	FALSE	TRUE	13.8947	11	11	10	3.45066e+08	27.99
High	Q28085	Complement factor H OS=Bos taurus GN=CFH PE=1 SV=3	TRUE	FALSE	9.06149	10	11	10	4.01956e+07	29.51
High	D3Z3G6	Mitogen-activated protein kinase OS=Mus musculus OX=10090 GN=Mapk3 PE=1 SV=1	FALSE	TRUE	31.8421	9	10	5	3.44441e+07	27.83
High	Q6A0C9	MKIAA0109 protein (Fragment) OS=Mus musculus OX=10090 GN=Ap2m1 PE=2 SV=1	FALSE	TRUE	23.6239	9	10	9	2.45667e+07	25.35
High	Q3U6P5	RRM domain-containing protein OS=Mus musculus OX=10090 GN=Hnrnpc PE=2 SV=1	FALSE	TRUE	18.5629	7	11	7	67376713	31.34
High	Q5M9L1	60S ribosomal protein L36 OS=Mus musculus OX=10090 GN=Rpl36 PE=2 SV=1	FALSE	TRUE	34.2857	6	17	6	1.59238e+09	40.79
High	B2RXY7	Carbonyl reductase 1 OS=Mus musculus OX=10090 GN=Cbr1 PE=1 SV=1	FALSE	TRUE	40.4332	8	10	8	3.20353e+07	24.7
High	Q8VCW8	Medium-chain acyl-CoA ligase ACSF2, mitochondrial OS=Mus musculus OX=10090 GN=Acsf2 PE=1 SV=1	FALSE	TRUE	20.813	11	12	11	3.26821e+07	28.05
High	P04104	Keratin, type II cytoskeletal 1 OS=Mus musculus OX=10090 GN=Krt1 PE=1 SV=4	FALSE	TRUE	7.22135	9	40	1		115.99
High	Q3TI63	PX domain-containing protein OS=Mus musculus OX=10090 GN=Snx1 PE=2 SV=1	FALSE	TRUE	25.0958	11	11	9	4.34935e+07	28.96
High	P62196	26S proteasome regulatory subunit 8 OS=Mus musculus OX=10090 GN=Psmc5 PE=1 SV=1	FALSE	TRUE	32.5123	11	12	10	3.92354e+07	29.9
High	P25446	Tumor necrosis factor receptor superfamily member 6 OS=Mus musculus OX=10090 GN=Fas PE=1 SV=2	FALSE	TRUE	25.6881	6	8	6	1.94694e+08	25.68
High	P60766	Cell division control protein 42 homolog OS=Mus musculus OX=10090 GN=Cdc42 PE=1 SV=2	FALSE	TRUE	48.1675	8	13	7	5.15166e+08	31.35
High	Q569Z6	Thyroid hormone receptor-associated protein 3 OS=Mus musculus OX=10090 GN=Thrap3 PE=1 SV=1	FALSE	TRUE	10.3049	9	12	8	5.30457e+07	31.29
High	Q91YE6	Importin-9 OS=Mus musculus OX=10090 GN=Ipo9 PE=1 SV=3	FALSE	TRUE	11.0471	9	11	9	2.95264e+07	24.7
High	Q571F9	MKIAA4115 protein (Fragment) OS=Mus musculus OX=10090 GN=G3bp1 PE=2 SV=1	FALSE	TRUE	24.9505	10	12	10	1.05483e+08	25.58
High	Q3TLE5	S5 DRBM domain-containing protein OS=Mus musculus OX=10090 GN=Rps2 PE=2 SV=1	FALSE	TRUE	31.3993	9	12	9	2.42422e+08	27.74
High	A0A1Y7VKY1	Ribosomal protein S18, pseudogene 5 OS=Mus musculus OX=10090 GN=Rps18-ps5 PE=3 SV=1	FALSE	TRUE	48.6842	10	16	10	1.00284e+09	41.15
High	A0A1L1STE6	Isocitrate dehydrogenase [NAD] subunit, mitochondrial OS=Mus musculus OX=10090 GN=Idh3a PE=1 SV=1	FALSE	TRUE	28.125	9	11	9	1.51752e+08	30.38
High	O35864	COP9 signalosome complex subunit 5 OS=Mus musculus OX=10090 GN=Cops5 PE=1 SV=3	FALSE	TRUE	29.9401	9	10	9	4.93603e+07	20.65
High	P97496	SWI/SNF complex subunit SMARCC1 OS=Mus musculus OX=10090 GN=Smarcc1 PE=1 SV=2	FALSE	TRUE	10.1449	8	10	5	2.49169e+07	28.93
High	Q3TI07	Uncharacterized protein OS=Mus musculus OX=10090 GN=Capn1 PE=1 SV=1	FALSE	TRUE	16.2693	11	12	11	2.67617e+07	26.17
High	Q09163	Protein delta homolog 1 OS=Mus musculus OX=10090 GN=Dlk1 PE=1 SV=1	FALSE	TRUE	24.6753	8	15	8	7.97278e+08	38.85
High	Q9DBC7	cAMP-dependent protein kinase type I-alpha regulatory subunit OS=Mus musculus OX=10090 GN=Prkar1a PE=1 SV=3	FALSE	TRUE	28.6089	11	14	7	8.1105e+07	34.94
High	Q6P5E4	UDP-glucose:glycoprotein glucosyltransferase 1 OS=Mus musculus OX=10090 GN=Uggt1 PE=1 SV=4	FALSE	TRUE	8.70406	13	13	13	2.79458e+07	28.46
High	P47915	60S ribosomal protein L29 OS=Mus musculus OX=10090 GN=Rpl29 PE=1 SV=2	FALSE	TRUE	33.75	8	15	8	1.18597e+10	34.4
High	Q9CXX1	Uncharacterized protein OS=Mus musculus OX=10090 GN=Napa PE=2 SV=1	FALSE	TRUE	34.5763	9	11	9	71011131	32.14
High	Q3US15	NAD(P)-dependent steroid dehydrogenase-like protein OS=Mus musculus OX=10090 GN=Nsdhl PE=1 SV=1	FALSE	TRUE	30.1105	9	11	9	9.64987e+07	30.13
High	Q3UEB3	Poly(U)-binding-splicing factor PUF60 OS=Mus musculus OX=10090 GN=Puf60 PE=1 SV=2	FALSE	TRUE	20.2128	11	13	11	4.4994e+07	30.11
High	P11688	Integrin alpha-5 OS=Mus musculus OX=10090 GN=Itga5 PE=1 SV=3	FALSE	TRUE	12.8205	13	15	13	1.0761e+08	31.62
High	J3QMG3	Voltage-dependent anion-selective channel protein 3 OS=Mus musculus OX=10090 GN=Vdac3 PE=1 SV=1	FALSE	TRUE	38.3803	9	11	8	1.05252e+08	28.61
High	P63325	40S ribosomal protein S10 OS=Mus musculus OX=10090 GN=Rps10 PE=1 SV=1	FALSE	TRUE	38.1818	7	18	7	386861142	49.7
High	Q60597	2-oxoglutarate dehydrogenase, mitochondrial OS=Mus musculus OX=10090 GN=Ogdh PE=1 SV=3	FALSE	TRUE	12.219	12	12	12	3.12589e+07	26.17
High	Q8BMS1	Trifunctional enzyme subunit alpha, mitochondrial OS=Mus musculus OX=10090 GN=Hadha PE=1 SV=1	FALSE	TRUE	18.4797	10	11	10	7.90604e+07	29.19
High	Q3TVM1	Uncharacterized protein OS=Mus musculus OX=10090 GN=Sf3a1 PE=2 SV=1	FALSE	TRUE	18.3312	11	14	11	5.35872e+07	42.24
High	A6ZI44	Fructose-bisphosphate aldolase OS=Mus musculus OX=10090 GN=Aldoa PE=1 SV=1	FALSE	TRUE	27.512	10	10	10	5.73641e+07	28.52
High	P42227	Signal transducer and activator of transcription 3 OS=Mus musculus OX=10090 GN=Stat3 PE=1 SV=2	FALSE	TRUE	18.4416	10	12	10	2.95071e+07	28.33
High	Q69ZP5	MKIAA1181 protein (Fragment) OS=Mus musculus OX=10090 GN=Ergic1 PE=2 SV=1	FALSE	TRUE	30.3125	8	10	8	7.19445e+07	18.47
High	Q8BH97	Reticulocalbin-3 OS=Mus musculus OX=10090 GN=Rcn3 PE=1 SV=1	FALSE	TRUE	26.2195	7	9	7	5.1986e+07	25.39
High	Q9D554	Splicing factor 3A subunit 3 OS=Mus musculus OX=10090 GN=Sf3a3 PE=1 SV=2	FALSE	TRUE	20.1597	8	11	8	4.35632e+07	32.42
High	Q9DBS1	Transmembrane protein 43 OS=Mus musculus OX=10090 GN=Tmem43 PE=1 SV=1	FALSE	TRUE	23	7	10	7	2.87541e+07	24.64
High	Q62159	Rho-related GTP-binding protein RhoC OS=Mus musculus OX=10090 GN=Rhoc PE=1 SV=2	FALSE	TRUE	37.3057	7	12	1	117836483	33.5
High	Q5M9P3	Rps19 protein (Fragment) OS=Mus musculus OX=10090 GN=Rps19 PE=2 SV=1	FALSE	TRUE	43.0464	9	18	9	1.22468e+09	44.13
High	Q3V3N6	PCI domain-containing protein OS=Mus musculus OX=10090 GN=Cops2 PE=2 SV=1	FALSE	TRUE	21.5556	8	10	8	3.62289e+07	26.68
High	A0A1W2P7A1	40S ribosomal protein S12 OS=Mus musculus OX=10090 GN=Rps12 PE=1 SV=1	FALSE	TRUE	41.8919	6	10	6	1.92592e+08	33.99
High	P47758	Signal recognition particle receptor subunit beta OS=Mus musculus OX=10090 GN=Srprb PE=1 SV=1	FALSE	TRUE	40.8922	9	11	9	6.38344e+07	28.82
High	Q9ERG0	LIM domain and actin-binding protein 1 OS=Mus musculus OX=10090 GN=Lima1 PE=1 SV=3	FALSE	TRUE	14.741	9	10	9	5.0004e+07	27.24
High	Q3TVV7	OMPdecase domain-containing protein OS=Mus musculus OX=10090 GN=Umps PE=2 SV=1	FALSE	TRUE	23.2848	10	12	10	5.06454e+07	28.1
High	Q3TL79	Aha1_N domain-containing protein OS=Mus musculus OX=10090 GN=Ahsa1 PE=2 SV=1	FALSE	TRUE	31.6568	10	11	10	7.23707e+07	23.12
High	A2APM2	CD44 antigen OS=Mus musculus OX=10090 GN=Cd44 PE=1 SV=1	FALSE	TRUE	8.46154	5	6	5	1.27776e+08	23.57
High	P53811	Phosphatidylinositol transfer protein beta isoform OS=Mus musculus OX=10090 GN=Pitpnb PE=1 SV=2	FALSE	TRUE	37.6384	10	12	8	9.87756e+07	29.39
High	Q3U890	Uncharacterized protein OS=Mus musculus OX=10090 GN=Hars PE=2 SV=1	FALSE	TRUE	16.11	7	8	7	8.36293e+07	22.75
High	Q9WVA3	Mitotic checkpoint protein BUB3 OS=Mus musculus OX=10090 GN=Bub3 PE=1 SV=2	FALSE	TRUE	34.9693	10	10	10	9.42008e+07	24.08
High	Q3TI98	B5 domain-containing protein OS=Mus musculus OX=10090 GN=Farsb PE=2 SV=1	FALSE	TRUE	24.4482	14	16	14	5.12459e+07	28.86
High	O08579	Emerin OS=Mus musculus OX=10090 GN=Emd PE=1 SV=1	FALSE	TRUE	33.5907	7	9	7	4.59308e+07	22.78
High	Q3THW7	Eukaryotic translation initiation factor 3 subunit H OS=Mus musculus OX=10090 GN=Eif3h PE=2 SV=1	FALSE	TRUE	25.5682	9	10	9	1.48447e+08	28.18
High	Q8C605	ATP-dependent 6-phosphofructokinase OS=Mus musculus OX=10090 GN=Pfkp PE=1 SV=1	FALSE	TRUE	12.3724	8	10	6	7.31231e+06	30.84
High	Q3U6C7	Succinate-CoA ligase subunit beta (Fragment) OS=Mus musculus OX=10090 GN=Sucla2 PE=2 SV=1	FALSE	TRUE	22.1277	10	10	10	47204380	24.99
High	Q3TIQ2	Uncharacterized protein OS=Mus musculus OX=10090 GN=Rpl12 PE=2 SV=1	FALSE	TRUE	54.5455	6	10	6	5.19268e+08	29.17
High	P56395	Cytochrome b5 OS=Mus musculus OX=10090 GN=Cyb5a PE=1 SV=2	FALSE	TRUE	41.0448	4	13	4	1.56438e+08	40.04
High	E9Q912	RAP1, GTP-GDP dissociation stimulator 1 OS=Mus musculus OX=10090 GN=Rap1gds1 PE=1 SV=1	FALSE	TRUE	15.9802	7	9	7	19462277	23.88
High	P62141	Serine/threonine-protein phosphatase PP1-beta catalytic subunit OS=Mus musculus OX=10090 GN=Ppp1cb PE=1 SV=3	FALSE	TRUE	26.6055	7	10	1	34034264	26.51
High	P27659	60S ribosomal protein L3 OS=Mus musculus OX=10090 GN=Rpl3 PE=1 SV=3	FALSE	TRUE	27.2953	11	12	11	1.16535e+08	29.27
High	Q99KP6	Pre-mRNA-processing factor 19 OS=Mus musculus OX=10090 GN=Prpf19 PE=1 SV=1	FALSE	TRUE	21.8254	7	8	7	62599510	20.31
High	Q9WUD1	STIP1 homology and U box-containing protein 1 OS=Mus musculus OX=10090 GN=Stub1 PE=1 SV=1	FALSE	TRUE	42.4342	12	14	12	8.84001e+07	33.49
High	Q99MR6	Serrate RNA effector molecule homolog OS=Mus musculus OX=10090 GN=Srrt PE=1 SV=1	FALSE	TRUE	14.5143	13	13	13	5.65086e+07	29.07
High	Q8BH59	Calcium-binding mitochondrial carrier protein Aralar1 OS=Mus musculus OX=10090 GN=Slc25a12 PE=1 SV=1	FALSE	TRUE	16.1004	10	10	6	2.20962e+07	22.65
High	A0A5F8MPK9	Phosphatidylinositide phosphatase SAC1 OS=Mus musculus OX=10090 GN=Sacm1l PE=4 SV=1	FALSE	TRUE	18.7192	11	11	11	9.38606e+07	26.71
High	Q9Z277	Tyrosine-protein kinase BAZ1B OS=Mus musculus OX=10090 GN=Baz1b PE=1 SV=2	FALSE	TRUE	10.0068	13	13	13	2.0952e+07	23.36
High	Q9WU62	Inner centromere protein OS=Mus musculus OX=10090 GN=Incenp PE=1 SV=2	FALSE	TRUE	14.7727	11	12	11	3.8527e+07	25.66
High	Q9Z1R2	Large proline-rich protein BAG6 OS=Mus musculus OX=10090 GN=Bag6 PE=1 SV=1	FALSE	TRUE	10.4853	8	8	8	2.4551e+07	23.3
High	Q3UNH3	PITH domain-containing protein (Fragment) OS=Mus musculus OX=10090 GN=Txnl1 PE=2 SV=1	FALSE	TRUE	39.5349	9	10	9	5.36449e+07	23.71
High	P62751	60S ribosomal protein L23a OS=Mus musculus OX=10090 GN=Rpl23a PE=1 SV=1	FALSE	TRUE	41.0256	9	21	9	1.35987e+09	53.48
High	Q3UIG0	Eukaryotic translation initiation factor 3 subunit E OS=Mus musculus OX=10090 GN=Eif3e PE=1 SV=1	FALSE	TRUE	19.7753	9	11	9	1.15013e+08	25.01
High	E1B991	Uncharacterized protein OS=Bos taurus GN=KRT2 PE=3 SV=2	TRUE	FALSE	9.88655	8	36	1	166013201	100.06
High	A0A5F8MPZ2	Kinesin light chain 1 OS=Mus musculus OX=10090 GN=Klc1 PE=4 SV=1	FALSE	TRUE	16.6405	10	10	10	6.12456e+07	23.9
High	F7DBB3	AHNAK nucleoprotein 2 (Fragment) OS=Mus musculus OX=10090 GN=Ahnak2 PE=1 SV=1	FALSE	TRUE	10.2792	5	7	5	7.33265e+07	25.66
High	Q3TLP8	Ras-related C3 botulinum toxin substrate 1 OS=Mus musculus OX=10090 GN=Rac1 PE=1 SV=1	FALSE	TRUE	34.1232	7	16	6	4.64774e+08	36.5
High	P27612	Phospholipase A-2-activating protein OS=Mus musculus OX=10090 GN=Plaa PE=1 SV=4	FALSE	TRUE	15.1134	10	12	10	2.38717e+07	31.18
High	D3U0D6	Kidney highly expressed protein 1 OS=Mus musculus OX=10090 GN=Rrp7a PE=2 SV=1	FALSE	TRUE	33.9286	6	10	6	7.65569e+07	30.92
High	Q9D8E6	60S ribosomal protein L4 OS=Mus musculus OX=10090 GN=Rpl4 PE=1 SV=3	FALSE	TRUE	27.685	11	13	11	1.04935e+08	34.35
High	Q9Z2I8	Succinate--CoA ligase [GDP-forming] subunit beta, mitochondrial OS=Mus musculus OX=10090 GN=Suclg2 PE=1 SV=3	FALSE	TRUE	34.1801	12	13	12	8.88665e+07	31.74
High	P19012	Keratin, type I cytoskeletal 15 OS=Homo sapiens GN=KRT15 PE=1 SV=3	TRUE	FALSE	17.3246	10	31	3	4.4201e+07	70.3
High	Q9CZT5	Vasorin OS=Mus musculus OX=10090 GN=Vasn PE=2 SV=2	FALSE	TRUE	12.9272	8	11	8	1.33946e+08	28.12
High	Q6P1F6	Serine/threonine-protein phosphatase 2A 55 kDa regulatory subunit B alpha isoform OS=Mus musculus OX=10090 GN=Ppp2r2a PE=1 SV=1	FALSE	TRUE	25.9508	10	12	10	1.40032e+08	33.16
High	Q9EPJ9	ADP-ribosylation factor GTPase-activating protein 1 OS=Mus musculus OX=10090 GN=Arfgap1 PE=1 SV=2	FALSE	TRUE	23.6715	6	7	6	3.31866e+07	22.42
High	Q61033	Lamina-associated polypeptide 2, isoforms alpha/zeta OS=Mus musculus OX=10090 GN=Tmpo PE=1 SV=4	FALSE	TRUE	24.9639	13	13	8	3.53617e+07	37.16
High	Q543F3	Calponin OS=Mus musculus OX=10090 GN=Cnn2 PE=1 SV=1	FALSE	TRUE	41.9672	9	10	8	2.55613e+08	26.53
High	P03991	H-2 class I histocompatibility antigen, K-W28 alpha chain OS=Mus musculus OX=10090 GN=H2-K1 PE=1 SV=2	FALSE	TRUE	29.8913	9	10	7	1.31913e+08	28.08
High	Q9QZF2	Glypican-1 OS=Mus musculus OX=10090 GN=Gpc1 PE=1 SV=1	FALSE	TRUE	16.5171	6	8	6	2.77224e+07	19.58
High	Q58A84	NSR1 OS=Mus musculus OX=10090 GN=Scarf2 PE=1 SV=1	FALSE	TRUE	13.2053	9	9	9	1.14356e+08	22.36
High	Q3URM4	Thioredoxin domain-containing protein OS=Mus musculus OX=10090 GN=Erp44 PE=2 SV=1	FALSE	TRUE	16.9951	6	10	5	6.66502e+07	21.65
High	Q9WTP7	GTP:AMP phosphotransferase AK3, mitochondrial OS=Mus musculus OX=10090 GN=Ak3 PE=1 SV=3	FALSE	TRUE	46.696	9	9	9	2.99407e+07	21.91
High	Q3T9L0	Uncharacterized protein OS=Mus musculus OX=10090 GN=Ddx39 PE=2 SV=1	FALSE	TRUE	30.445	11	15	4	2.57451e+07	26.63
High	Q3UR33	Uncharacterized protein OS=Mus musculus OX=10090 GN=Tmpo PE=2 SV=1	FALSE	TRUE	32.9646	10	10	5	1.25729e+08	30.69
High	P62937	Peptidyl-prolyl cis-trans isomerase A OS=Homo sapiens GN=PPIA PE=1 SV=2	TRUE	TRUE	35.1515	7	10	7	3.12913e+08	26.6
High	Q9QYB1	Chloride intracellular channel protein 4 OS=Mus musculus OX=10090 GN=Clic4 PE=1 SV=3	FALSE	TRUE	40.7115	6	8	6	4.77429e+07	25.73
High	P61164	Alpha-centractin OS=Mus musculus OX=10090 GN=Actr1a PE=1 SV=1	FALSE	TRUE	28.4574	8	11	3	2.5417e+07	26.17
High	Q921T2	Torsin-1A-interacting protein 1 OS=Mus musculus OX=10090 GN=Tor1aip1 PE=1 SV=3	FALSE	TRUE	17.479	7	10	6	2.56758e+07	25.97
High	Q99JI4	26S proteasome non-ATPase regulatory subunit 6 OS=Mus musculus OX=10090 GN=Psmd6 PE=1 SV=1	FALSE	TRUE	25.7069	10	10	10	4.79714e+07	26.33
High	Q01149	Collagen alpha-2(I) chain OS=Mus musculus OX=10090 GN=Col1a2 PE=1 SV=2	FALSE	TRUE	11.4431	10	10	10	3.04501e+07	25.77
High	P47857	ATP-dependent 6-phosphofructokinase, muscle type OS=Mus musculus OX=10090 GN=Pfkm PE=1 SV=3	FALSE	TRUE	13.2051	8	9	6	22956697	20.53
High	Q8C266	Ras-related protein Rab-5C OS=Mus musculus OX=10090 GN=Rab5c PE=1 SV=1	FALSE	TRUE	35.8974	7	12	4	8.53243e+07	30.26
High	P63168	Dynein light chain 1, cytoplasmic OS=Mus musculus OX=10090 GN=Dynll1 PE=1 SV=1	FALSE	TRUE	57.3034	4	9	4	2.05631e+08	21.95
High	P62984	Ubiquitin-60S ribosomal protein L40 OS=Mus musculus OX=10090 GN=Uba52 PE=1 SV=2	FALSE	TRUE	49.2188	7	27	1	2.3908e+06	59.89
High	Q2UVX4	Complement C3 OS=Bos taurus GN=C3 PE=1 SV=2	TRUE	FALSE	8.60927	11	12	11	1.93474e+07	30.62
High	Q91XH5	Sepiapterin reductase OS=Mus musculus OX=10090 GN=Spr PE=1 SV=1	FALSE	TRUE	38.1679	8	10	1	3.96473e+06	20.27
High	Q9QX15	Calcium-activated chloride channel regulator 3A-1 OS=Mus musculus OX=10090 GN=Clca3a1 PE=1 SV=1	FALSE	TRUE	15.7428	10	10	10	1.82524e+07	23.04
High	Q3TGC5	Uncharacterized protein OS=Mus musculus OX=10090 GN=Pebp1 PE=2 SV=1	FALSE	TRUE	50.8021	6	7	6	1.62639e+08	22.93
High	Q8BVQ9	26S proteasome regulatory subunit 7 OS=Mus musculus OX=10090 GN=Psmc2 PE=1 SV=1	FALSE	TRUE	25.0526	10	10	10	4.92803e+07	24.73
High	P62301	40S ribosomal protein S13 OS=Mus musculus OX=10090 GN=Rps13 PE=1 SV=2	FALSE	TRUE	46.3576	8	17	8	561384524	32.72
High	Q3V1X4	Uncharacterized protein OS=Mus musculus OX=10090 GN=Surf6 PE=2 SV=1	FALSE	TRUE	29.0141	12	15	12	146580584	28.66
High	P97384	Annexin A11 OS=Mus musculus OX=10090 GN=Anxa11 PE=1 SV=2	FALSE	TRUE	24.0557	10	11	9	5.24858e+07	29.32
High	Q9ET54	Palladin OS=Mus musculus OX=10090 GN=Palld PE=1 SV=2	FALSE	TRUE	8.80682	10	10	10	6.50701e+07	24.39
High	Q9R1V7	Disintegrin and metalloproteinase domain-containing protein 23 OS=Mus musculus OX=10090 GN=Adam23 PE=1 SV=1	FALSE	TRUE	14.3546	10	12	10	6.94659e+07	27.15
High	Q8BLN5	Lanosterol synthase OS=Mus musculus OX=10090 GN=Lss PE=1 SV=2	FALSE	TRUE	13.6426	8	8	8	2.69269e+07	19.85
High	Q8VH51	RNA-binding protein 39 OS=Mus musculus OX=10090 GN=Rbm39 PE=1 SV=2	FALSE	TRUE	15.283	6	7	6	5.90069e+07	22.04
High	P67778	Prohibitin OS=Mus musculus OX=10090 GN=Phb PE=1 SV=1	FALSE	TRUE	33.4559	8	9	8	1.98111e+08	20.52
High	Q3UKJ7	WD40 repeat-containing protein SMU1 OS=Mus musculus OX=10090 GN=Smu1 PE=2 SV=2	FALSE	TRUE	18.5185	9	11	9	2.4783e+07	25.78
High	Q8C1W9	Uncharacterized protein OS=Mus musculus OX=10090 GN=Nap1l4 PE=2 SV=1	FALSE	TRUE	16.3507	6	10	5	3.18296e+07	27.39
High	Q6ZQ58	La-related protein 1 OS=Mus musculus OX=10090 GN=Larp1 PE=1 SV=3	FALSE	TRUE	13.5261	10	10	10	4.50101e+07	27.84
High	Q3U561	Ribosomal protein OS=Mus musculus OX=10090 GN=Rpl10a PE=2 SV=1	FALSE	TRUE	32.2581	6	8	6	238240746	16.77
High	O35129	Prohibitin-2 OS=Mus musculus OX=10090 GN=Phb2 PE=1 SV=1	FALSE	TRUE	33.1104	9	9	9	1.1552e+08	20.33
High	P42208	Septin-2 OS=Mus musculus OX=10090 GN=Septin2 PE=1 SV=2	FALSE	TRUE	27.1468	8	9	8	8.80774e+07	23.29
High	P47753	F-actin-capping protein subunit alpha-1 OS=Mus musculus OX=10090 GN=Capza1 PE=1 SV=4	FALSE	TRUE	46.8531	8	9	6	5.00628e+07	26.28
High	Q9D050	Mitochondrial carrier homolog 2 OS=Mus musculus OX=10090 GN=Mtch2 PE=1 SV=1	FALSE	TRUE	23.0769	6	13	6	7.72664e+07	32.29
High	Q3U5U6	Heme oxygenase OS=Mus musculus OX=10090 GN=Hmox1 PE=1 SV=1	FALSE	TRUE	24.5675	5	6	5	5.40242e+07	21.44
High	Q3U2X5	Amine oxidase OS=Mus musculus OX=10090 GN=Maoa PE=2 SV=1	FALSE	TRUE	19.2015	9	12	9	1.07679e+08	28.13
High	Q60930	Voltage-dependent anion-selective channel protein 2 OS=Mus musculus OX=10090 GN=Vdac2 PE=1 SV=2	FALSE	TRUE	31.5254	7	7	7	1.53525e+08	17.65
High	Q3UJL7	PABS domain-containing protein OS=Mus musculus OX=10090 GN=Srm PE=2 SV=1	FALSE	TRUE	37.4172	9	12	9	1.1703e+08	36.2
High	Q5SX75	Prolyl 4-hydroxylase subunit alpha-2 OS=Mus musculus OX=10090 GN=P4ha2 PE=1 SV=1	FALSE	TRUE	15.6425	7	10	6	3.93437e+07	27.81
High	P56959	RNA-binding protein FUS OS=Mus musculus OX=10090 GN=Fus PE=1 SV=1	FALSE	TRUE	13.3205	6	10	6	1.75129e+08	30.58
High	P14576	Signal recognition particle 54 kDa protein OS=Mus musculus OX=10090 GN=Srp54 PE=1 SV=2	FALSE	TRUE	14.0873	7	7	7	2.8397e+07	21.01
High	O70503	Very-long-chain 3-oxoacyl-CoA reductase OS=Mus musculus OX=10090 GN=Hsd17b12 PE=1 SV=1	FALSE	TRUE	25.9615	7	9	7	1.3623e+08	19.36
High	Q3U417	Uncharacterized protein OS=Mus musculus OX=10090 GN=Ppfibp1 PE=2 SV=1	FALSE	TRUE	15.8927	12	13	12	2.59985e+07	22.19
High	Q9EPL8	Importin-7 OS=Mus musculus OX=10090 GN=Ipo7 PE=1 SV=2	FALSE	TRUE	8.95954	8	9	8	5.03776e+07	22.79
High	Q0PD54	Rab6A OS=Mus musculus OX=10090 GN=Rab6a PE=2 SV=1	FALSE	TRUE	46.1538	9	11	4	9.55936e+07	27.01
High	Q8CJF7	Protein ELYS OS=Mus musculus OX=10090 GN=Ahctf1 PE=1 SV=1	FALSE	TRUE	6.59831	12	12	12	1.80678e+07	29.36
High	P14148	60S ribosomal protein L7 OS=Mus musculus OX=10090 GN=Rpl7 PE=1 SV=2	FALSE	TRUE	30.3704	9	11	9	8.64572e+07	27.38
High	Q3TLQ9	RRM domain-containing protein OS=Mus musculus OX=10090 GN=Eif4b PE=2 SV=1	FALSE	TRUE	13.9116	6	8	1	62634847	24
High	Q8C2Q3	RNA-binding protein 14 OS=Mus musculus OX=10090 GN=Rbm14 PE=1 SV=1	FALSE	TRUE	18.0867	10	11	10	6.15611e+07	25.88
High	Q3UCF2	Uncharacterized protein OS=Mus musculus OX=10090 GN=Cdc5l PE=1 SV=1	FALSE	TRUE	15.586	9	9	9	1.39555e+07	24.68
High	P37040	NADPH--cytochrome P450 reductase OS=Mus musculus OX=10090 GN=Por PE=1 SV=2	FALSE	TRUE	12.8319	7	10	7	6.86661e+07	26.04
High	Q3UL32	Uncharacterized protein OS=Mus musculus OX=10090 GN=Dnajc7 PE=2 SV=1	FALSE	TRUE	15.7895	7	8	7	2.16647e+07	19.59
High	Q6DFW4	Nucleolar protein 58 OS=Mus musculus OX=10090 GN=Nop58 PE=1 SV=1	FALSE	TRUE	16.2313	7	9	7	5.36405e+07	23.27
High	O54734	Dolichyl-diphosphooligosaccharide--protein glycosyltransferase 48 kDa subunit OS=Mus musculus OX=10090 GN=Ddost PE=1 SV=2	FALSE	TRUE	22.6757	9	9	9	1.04951e+08	18.95
High	P84084	ADP-ribosylation factor 5 OS=Mus musculus OX=10090 GN=Arf5 PE=1 SV=2	FALSE	TRUE	44.4444	7	10	2	3.41899e+07	29.94
High	P62880	Guanine nucleotide-binding protein G(I)/G(S)/G(T) subunit beta-2 OS=Mus musculus OX=10090 GN=Gnb2 PE=1 SV=3	FALSE	TRUE	22.0588	7	11	5	8.47469e+07	28.4
High	Q569Z5	Probable ATP-dependent RNA helicase DDX46 OS=Mus musculus OX=10090 GN=Ddx46 PE=1 SV=2	FALSE	TRUE	10.4651	10	10	10	1.85717e+07	25.01
High	B1GX81	PAK3cb protein OS=Mus musculus OX=10090 GN=Pak3 PE=2 SV=1	FALSE	TRUE	14.3103	6	7	1		19.95
High	Q3UMA3	Hepatocyte growth factor-regulated tyrosine kinase substrate OS=Mus musculus OX=10090 GN=Hgs PE=1 SV=1	FALSE	TRUE	9.14948	7	8	7	2.80952e+07	15.87
High	Q80X98	DEAH (Asp-Glu-Ala-His) box polypeptide 38 OS=Mus musculus OX=10090 GN=Dhx38 PE=1 SV=1	FALSE	TRUE	8.71336	10	11	10	3.0686e+07	26.32
High	Q60737	Casein kinase II subunit alpha OS=Mus musculus OX=10090 GN=Csnk2a1 PE=1 SV=2	FALSE	TRUE	20.4604	7	9	5	2.34982e+07	15.05
High	A0A3B2WCL5	Ran-binding protein 3 OS=Mus musculus OX=10090 GN=Ranbp3 PE=1 SV=1	FALSE	TRUE	20.7885	11	13	11	6.42728e+07	28.65
High	H7BX94	Lysine-rich nucleolar protein 1 OS=Mus musculus OX=10090 GN=Knop1 PE=1 SV=2	FALSE	TRUE	15.0376	7	8	7	3.79039e+07	20.99
High	Q61171	Peroxiredoxin-2 OS=Mus musculus OX=10090 GN=Prdx2 PE=1 SV=3	FALSE	TRUE	44.4444	7	11	7	674382106	32.16
High	Q3U1J4	DNA damage-binding protein 1 OS=Mus musculus OX=10090 GN=Ddb1 PE=1 SV=2	FALSE	TRUE	10.2632	10	10	10	1.78341e+07	25.24
High	Q9Z247	Peptidyl-prolyl cis-trans isomerase FKBP9 OS=Mus musculus OX=10090 GN=Fkbp9 PE=1 SV=1	FALSE	TRUE	21.5789	11	11	10	9.00281e+07	21.07
High	Q8R050	Eukaryotic peptide chain release factor GTP-binding subunit ERF3A OS=Mus musculus OX=10090 GN=Gspt1 PE=1 SV=2	FALSE	TRUE	15.8805	8	12	8	1.0481e+08	36.77
High	Q61398	Procollagen C-endopeptidase enhancer 1 OS=Mus musculus OX=10090 GN=Pcolce PE=1 SV=2	FALSE	TRUE	16.2393	6	8	6	6.2457e+07	19.7
High	Q3TJN6	Sorting nexin OS=Mus musculus OX=10090 GN=Snx5 PE=2 SV=1	FALSE	TRUE	23.0198	9	9	9	3.51543e+07	21.89
High	J3QPG5	Prosaposin OS=Mus musculus OX=10090 GN=Psap PE=1 SV=1	FALSE	TRUE	14.1831	7	9	7	2.95179e+08	25.17
High	Q3UY68	Uncharacterized protein OS=Mus musculus OX=10090 GN=Camk1 PE=1 SV=1	FALSE	TRUE	24.8663	8	12	8	5.56831e+07	27.28
High	Q64105	Sepiapterin reductase OS=Mus musculus OX=10090 GN=Spr PE=1 SV=1	FALSE	TRUE	38.3142	8	9	1	967341	20.36
High	G5E870	E3 ubiquitin-protein ligase TRIP12 OS=Mus musculus OX=10090 GN=Trip12 PE=1 SV=1	FALSE	TRUE	7.20988	12	14	12	1.63637e+07	32.6
High	Q91Z25	Actin-related protein 2/3 complex subunit OS=Mus musculus OX=10090 GN=Arpc1b PE=1 SV=1	FALSE	TRUE	21.2766	7	9	7	1.32246e+08	23.91
High	Q545V8	Protein kinase domain-containing protein OS=Mus musculus OX=10090 GN=Csnk2a2 PE=1 SV=1	FALSE	TRUE	26.8571	8	8	6	1.19085e+07	17.77
High	Q545A2	Uncharacterized protein OS=Mus musculus OX=10090 GN=Slc25a5 PE=1 SV=1	FALSE	TRUE	31.5436	11	15	5	1.92013e+08	28.1
High	Q80U76	Ribosome biogenesis regulatory protein (Fragment) OS=Mus musculus OX=10090 GN=Rrs1 PE=2 SV=2	FALSE	TRUE	23.0563	9	12	9	6.19121e+07	25.53
High	Q3TAW4	Protein transport protein SEC23 OS=Mus musculus OX=10090 GN=Sec23b PE=2 SV=1	FALSE	TRUE	13.1682	8	10	6	1.82943e+07	23.7
High	Q3UPA1	Uncharacterized protein OS=Mus musculus OX=10090 GN=Gna11 PE=1 SV=1	FALSE	TRUE	30.6407	10	11	5	2.13561e+07	25.64
High	P43275	Histone H1.1 OS=Mus musculus OX=10090 GN=H1-1 PE=1 SV=2	FALSE	TRUE	29.5775	5	8	3	8.9862e+07	19.29
High	A0A1B0GR11	Transaldolase OS=Mus musculus OX=10090 GN=Taldo1 PE=1 SV=1	FALSE	TRUE	28.534	11	13	11	104573153	30.66
High	P61205	ADP-ribosylation factor 3 OS=Mus musculus OX=10090 GN=Arf3 PE=2 SV=2	FALSE	TRUE	43.0939	7	11	3	175488020	33.01
High	Q6GU68	Immunoglobulin superfamily containing leucine-rich repeat protein OS=Mus musculus OX=10090 GN=Islr PE=1 SV=1	FALSE	TRUE	16.1215	6	8	6	1.11306e+08	19.43
High	A0A0G2JEC4	Endophilin-B1 OS=Mus musculus OX=10090 GN=Sh3glb1 PE=1 SV=1	FALSE	TRUE	17.2589	7	9	6	2.93626e+07	21.76
High	Q9Z0X1	Apoptosis-inducing factor 1, mitochondrial OS=Mus musculus OX=10090 GN=Aifm1 PE=1 SV=1	FALSE	TRUE	15.1961	8	11	8	6.64862e+07	32.12
High	Q8R464	Cell adhesion molecule 4 OS=Mus musculus OX=10090 GN=Cadm4 PE=1 SV=1	FALSE	TRUE	17.7835	5	7	5	5.09275e+07	21.75
High	Q3U3F6	RRM domain-containing protein OS=Mus musculus OX=10090 GN=Raly PE=2 SV=1	FALSE	TRUE	28.7162	8	11	8	97182428	26.44
High	Q3THB0	RRM domain-containing protein OS=Mus musculus OX=10090 GN=Eif4b PE=2 SV=1	FALSE	TRUE	13.9116	6	8	1	9.26089e+06	23.84
High	Q3U6Q1	Uncharacterized protein OS=Mus musculus OX=10090 GN=Wbp11 PE=2 SV=1	FALSE	TRUE	17.9407	10	11	10	2.95146e+07	24.07
High	Q6ZQI3	Malectin OS=Mus musculus OX=10090 GN=Mlec PE=1 SV=2	FALSE	TRUE	33.677	9	10	9	6.06992e+07	24.07
High	P61161	Actin-related protein 2 OS=Mus musculus OX=10090 GN=Actr2 PE=1 SV=1	FALSE	TRUE	23.8579	8	8	8	7.64721e+07	21.86
High	P97797	Tyrosine-protein phosphatase non-receptor type substrate 1 OS=Mus musculus OX=10090 GN=Sirpa PE=1 SV=2	FALSE	TRUE	17.154	6	7	6	2.29019e+07	17.11
High	Q6ZWV7	60S ribosomal protein L35 OS=Mus musculus OX=10090 GN=Rpl35 PE=1 SV=1	FALSE	TRUE	30.0813	5	21	5	7.60977e+09	33.49
High	Q8C0E3	E3 ubiquitin-protein ligase TRIM47 OS=Mus musculus OX=10090 GN=Trim47 PE=1 SV=2	FALSE	TRUE	15.9126	8	8	8	3.3901e+07	19.14
High	Q8BJ71	Nuclear pore complex protein Nup93 OS=Mus musculus OX=10090 GN=Nup93 PE=1 SV=1	FALSE	TRUE	13.7973	10	11	10	4.26295e+07	23.98
High	P70677	Caspase-3 OS=Mus musculus OX=10090 GN=Casp3 PE=1 SV=1	FALSE	TRUE	23.1047	5	9	4	57041143	21.64
High	P26516	26S proteasome non-ATPase regulatory subunit 7 OS=Mus musculus OX=10090 GN=Psmd7 PE=1 SV=2	FALSE	TRUE	24.6106	7	8	7	6.314e+07	23.79
High	Q8K0D5	Elongation factor G, mitochondrial OS=Mus musculus OX=10090 GN=Gfm1 PE=1 SV=1	FALSE	TRUE	12.5166	8	9	8	7.55272e+06	22.07
High	Q69ZN1	MKIAA1252 protein (Fragment) OS=Mus musculus OX=10090 GN=Sgpl1 PE=2 SV=1	FALSE	TRUE	13.5043	7	9	7	5.09147e+07	22.66
High	Q3TMZ1	Pyrroline-5-carboxylate reductase OS=Mus musculus OX=10090 GN=Pycr2 PE=1 SV=1	FALSE	TRUE	29.0625	8	9	5	1.31948e+07	22.3
High	Q9D0M3	Cytochrome c1, heme protein, mitochondrial OS=Mus musculus OX=10090 GN=Cyc1 PE=1 SV=1	FALSE	TRUE	20	4	6	4	6.19529e+07	18.47
High	Q3TI79	PUA domain-containing protein OS=Mus musculus OX=10090 GN=Dkc1 PE=2 SV=1	FALSE	TRUE	23.5756	10	11	10	4.87037e+07	23.05
High	B2MWM9	Calreticulin OS=Mus musculus OX=10090 GN=Calr PE=1 SV=1	FALSE	TRUE	21.3942	6	7	6	6.87824e+07	20.35
High	P10922	Histone H1.0 OS=Mus musculus OX=10090 GN=H1-0 PE=2 SV=4	FALSE	TRUE	27.8351	5	9	5	1.85486e+09	25.56
High	Q9WTX6	Cullin-1 OS=Mus musculus OX=10090 GN=Cul1 PE=1 SV=1	FALSE	TRUE	11.5979	9	9	9	2.57569e+07	20.06
High	P18572	Basigin OS=Mus musculus OX=10090 GN=Bsg PE=1 SV=2	FALSE	TRUE	16.7095	6	13	6	6.10048e+08	38.68
High	P97807	Fumarate hydratase, mitochondrial OS=Mus musculus OX=10090 GN=Fh PE=1 SV=3	FALSE	TRUE	20.3156	7	7	7	8.59441e+07	21.25
High	Q8BTX4	Ribosome biogenesis protein NOP53 OS=Mus musculus OX=10090 GN=Nop53 PE=2 SV=1	FALSE	TRUE	21.281	7	9	1		29.43
High	O88477	Insulin-like growth factor 2 mRNA-binding protein 1 OS=Mus musculus OX=10090 GN=Igf2bp1 PE=1 SV=1	FALSE	TRUE	16.8111	8	8	8	3.07732e+07	20.77
High	Q8C5X6	Flap endonuclease 1 OS=Mus musculus OX=10090 GN=Fen1 PE=2 SV=1	FALSE	TRUE	20.6813	7	12	7	5.7154e+07	28.37
High	P50544	Very long-chain specific acyl-CoA dehydrogenase, mitochondrial OS=Mus musculus OX=10090 GN=Acadvl PE=1 SV=3	FALSE	TRUE	14.6341	7	7	7	2.85557e+07	20.1
High	Q9D1M0	Protein SEC13 homolog OS=Mus musculus OX=10090 GN=Sec13 PE=1 SV=3	FALSE	TRUE	24.2236	5	9	5	4.31047e+07	27.96
High	P14685	26S proteasome non-ATPase regulatory subunit 3 OS=Mus musculus OX=10090 GN=Psmd3 PE=1 SV=3	FALSE	TRUE	18.3019	8	8	8	29179916	19.5
High	E9QK04	Neogenin OS=Mus musculus OX=10090 GN=Neo1 PE=1 SV=1	FALSE	TRUE	8.64611	10	11	10	1.61046e+07	27.35
High	P63037	DnaJ homolog subfamily A member 1 OS=Mus musculus OX=10090 GN=Dnaja1 PE=1 SV=1	FALSE	TRUE	25.1889	7	11	7	6.87353e+07	26.09
High	Q3TXD3	PKS_ER domain-containing protein OS=Mus musculus OX=10090 GN=Vat1 PE=2 SV=1	FALSE	TRUE	21.1823	7	7	7	1.01311e+10	19.85
High	Q3TGI6	Uncharacterized protein (Fragment) OS=Mus musculus OX=10090 GN=Pitpna PE=2 SV=1	FALSE	TRUE	29.9712	11	12	9	4.4052e+07	28.46
High	Q3UJ70	3-hydroxy-3-methylglutaryl coenzyme A synthase OS=Mus musculus OX=10090 GN=Hmgcs1 PE=2 SV=1	FALSE	TRUE	19.4231	9	10	9	76827395	26.68
High	Q9CXW4	60S ribosomal protein L11 OS=Mus musculus OX=10090 GN=Rpl11 PE=1 SV=4	FALSE	TRUE	36.5169	7	10	7	5.99336e+08	26.08
High	Q3TZU7	Sorting nexin OS=Mus musculus OX=10090 GN=Snx9 PE=2 SV=1	FALSE	TRUE	14.6218	8	9	8	7.33134e+07	20.31
High	Q6NSP9	High mobility group protein HMGI-C OS=Mus musculus OX=10090 GN=Hmga2 PE=1 SV=1	FALSE	TRUE	34.8837	4	8	4	2.33171e+08	28.07
High	Q8K1J6	CCA tRNA nucleotidyltransferase 1, mitochondrial OS=Mus musculus OX=10090 GN=Trnt1 PE=1 SV=1	FALSE	TRUE	24.424	10	10	10	3.75794e+07	21.72
High	A0A1B0GSX7	Nuclear pore complex protein Nup98-Nup96 OS=Mus musculus OX=10090 GN=Nup98 PE=1 SV=1	FALSE	TRUE	7.54405	11	12	11	1.63202e+07	29.01
High	Q3TE45	Succinate dehydrogenase [ubiquinone] iron-sulfur subunit, mitochondrial OS=Mus musculus OX=10090 GN=Sdhb PE=2 SV=1	FALSE	TRUE	26.2411	7	8	7	2.00181e+07	16.94
High	P62897	Cytochrome c, somatic OS=Mus musculus OX=10090 GN=Cycs PE=1 SV=2	FALSE	TRUE	32.381	4	7	4	1.07805e+08	22.53
High	Q9CVB6	Actin-related protein 2/3 complex subunit 2 OS=Mus musculus OX=10090 GN=Arpc2 PE=1 SV=3	FALSE	TRUE	27.3333	9	10	9	9.05738e+07	22.09
High	O35516	Neurogenic locus notch homolog protein 2 OS=Mus musculus OX=10090 GN=Notch2 PE=1 SV=2	FALSE	TRUE	3.39668	7	8	6	1.27329e+07	22.06
High	Q678L1	Keratin 1b (Fragment) OS=Mus musculus OX=10090 GN=Krt77 PE=2 SV=1	FALSE	TRUE	20.0893	7	13	1	49523383	34.35
High	Q4FK36	Destrin OS=Mus musculus OX=10090 GN=Dstn PE=1 SV=1	FALSE	TRUE	53.3333	9	12	8	286555911	31.2
High	Q9DAR7	m7GpppX diphosphatase OS=Mus musculus OX=10090 GN=Dcps PE=1 SV=1	FALSE	TRUE	32.8402	8	9	8	2.87344e+07	18.57
High	O08583	THO complex subunit 4 OS=Mus musculus OX=10090 GN=Alyref PE=1 SV=3	FALSE	TRUE	23.5294	4	7	4	9.43465e+07	18.05
High	Q3TJB4	Uncharacterized protein OS=Mus musculus OX=10090 GN=Sh3gl1 PE=2 SV=1	FALSE	TRUE	25	7	9	7	61934153	21.44
High	Q8CGC6	RNA-binding protein 28 OS=Mus musculus OX=10090 GN=Rbm28 PE=1 SV=4	FALSE	TRUE	13.7333	9	10	9	24491286	24.93
High	P62830	60S ribosomal protein L23 OS=Mus musculus OX=10090 GN=Rpl23 PE=1 SV=1	FALSE	TRUE	43.5714	5	9	5	2.95441e+08	22.26
High	P69905	Hemoglobin subunit alpha OS=Homo sapiens GN=HBA1 PE=1 SV=2	TRUE	FALSE	41.5493	5	14	2	5.08984e+07	29.82
High	Q6PEV0	Epoxide hydrolase OS=Mus musculus OX=10090 GN=Ephx1 PE=2 SV=1	FALSE	TRUE	23.356	10	10	10	3.61357e+07	19.38
High	Q91VE6	MKI67 FHA domain-interacting nucleolar phosphoprotein OS=Mus musculus OX=10090 GN=Nifk PE=1 SV=1	FALSE	TRUE	35.0158	8	9	8	9.50667e+07	26.77
High	Q6ZWQ6	Uncharacterized protein OS=Mus musculus OX=10090 GN=Ube2k PE=1 SV=1	FALSE	TRUE	34	7	10	7	8.41349e+07	30.04
High	Q8VDK4	Cadherin 13 OS=Mus musculus OX=10090 GN=Cdh13 PE=1 SV=1	FALSE	TRUE	12.1849	7	9	7	8.31785e+07	25.07
High	Q8BK35	Ribosome biogenesis protein NOP53 OS=Mus musculus OX=10090 GN=Nop53 PE=1 SV=1	FALSE	TRUE	21.281	7	9	1		30.2
High	Q4VBE8	WD repeat-containing protein 18 OS=Mus musculus OX=10090 GN=Wdr18 PE=1 SV=1	FALSE	TRUE	19.0255	7	8	7	3.81442e+07	22.25
High	Q9CZU6	Citrate synthase, mitochondrial OS=Mus musculus OX=10090 GN=Cs PE=1 SV=1	FALSE	TRUE	20.9052	9	11	6	1.24159e+08	24.79
High	P62192	26S proteasome regulatory subunit 4 OS=Mus musculus OX=10090 GN=Psmc1 PE=1 SV=1	FALSE	TRUE	23.6364	8	10	7	4.15504e+07	24.43
High	E9QPB2	Suprabasin OS=Mus musculus OX=10090 GN=Sbsn PE=1 SV=1	FALSE	TRUE	15.1026	6	7	6	6.32661e+07	21.25
High	O88643	Serine/threonine-protein kinase PAK 1 OS=Mus musculus OX=10090 GN=Pak1 PE=1 SV=1	FALSE	TRUE	13.945	6	6	2	2.77037e+07	16.92
High	Q1RMN8	Immunoglobulin light chain, lambda gene cluster OS=Bos taurus GN=IGL@ PE=2 SV=1	TRUE	FALSE	20.0855	4	8	4	4.39817e+08	24.03
High	Q3TU79	J domain-containing protein OS=Mus musculus OX=10090 GN=Dnajb1 PE=1 SV=1	FALSE	TRUE	22.3529	7	8	6	2.81877e+07	23.18
High	P97300	Neuroplastin OS=Mus musculus OX=10090 GN=Nptn PE=1 SV=3	FALSE	TRUE	18.136	5	7	5	6.37324e+07	19.55
High	Q9CQK2	40S ribosomal protein S24 OS=Mus musculus OX=10090 GN=Rps24 PE=2 SV=1	FALSE	TRUE	29.1045	4	7	4	7.46972e+07	16.39
High	P48722	Heat shock 70 kDa protein 4L OS=Mus musculus OX=10090 GN=Hspa4l PE=1 SV=2	FALSE	TRUE	14.0811	9	10	8	1.35249e+07	24.61
High	P47199	Quinone oxidoreductase OS=Mus musculus OX=10090 GN=Cryz PE=1 SV=1	FALSE	TRUE	30.5136	7	7	7	1.64206e+07	18.46
High	Q6P9Q4	FH1/FH2 domain-containing protein 1 OS=Mus musculus OX=10090 GN=Fhod1 PE=1 SV=3	FALSE	TRUE	8.60485	8	8	8	6.29935e+06	21.41
High	Q6ZQ45	MKIAA0791 protein (Fragment) OS=Mus musculus OX=10090 GN=Nup155 PE=2 SV=1	FALSE	TRUE	9.06535	10	10	10	1.90235e+07	23.08
High	Q9CY58	Plasminogen activator inhibitor 1 RNA-binding protein OS=Mus musculus OX=10090 GN=Serbp1 PE=1 SV=2	FALSE	TRUE	26.0442	8	9	8	1.20758e+08	27.24
High	E9QB02	Methionine--tRNA ligase, cytoplasmic OS=Mus musculus OX=10090 GN=Mars PE=1 SV=1	FALSE	TRUE	13.0769	10	10	10	2.80445e+07	20.25
High	O09131	Glutathione S-transferase omega-1 OS=Mus musculus OX=10090 GN=Gsto1 PE=1 SV=2	FALSE	TRUE	38.3333	10	13	10	126315142	26.72
High	O35226	26S proteasome non-ATPase regulatory subunit 4 OS=Mus musculus OX=10090 GN=Psmd4 PE=1 SV=1	FALSE	TRUE	20.7447	6	8	1	1.44821e+07	21.96
High	Q01405	Protein transport protein Sec23A OS=Mus musculus OX=10090 GN=Sec23a PE=1 SV=2	FALSE	TRUE	12.2876	7	8	5	2.21413e+07	21.82
High	P0DP27	Calmodulin-2 OS=Mus musculus OX=10090 GN=Calm2 PE=1 SV=1	FALSE	TRUE	28.1879	5	8	5	1.22343e+08	21.87
High	Q3TIC8	Uncharacterized protein OS=Mus musculus OX=10090 GN=Uqcrc1 PE=2 SV=1	FALSE	TRUE	19.7917	8	9	7	46429118	21.12
High	Q6NXL1	Sec24-related gene family, member D (S. cerevisiae) OS=Mus musculus OX=10090 GN=Sec24d PE=1 SV=1	FALSE	TRUE	10.3682	8	9	8	2.28346e+07	15.14
High	Q5SUH6	Clathrin interactor 1 OS=Mus musculus OX=10090 GN=Clint1 PE=1 SV=1	FALSE	TRUE	13.1045	6	7	6	1.90902e+07	20.57
High	I6L9I7	Cbx3 protein OS=Mus musculus OX=10090 GN=Cbx3 PE=2 SV=1	FALSE	TRUE	23.4973	4	6	4	5.53072e+07	22.9
High	Q3UY25	CTCK domain-containing protein OS=Mus musculus OX=10090 GN=Grem1 PE=2 SV=1	FALSE	TRUE	27.5	4	6	4	4.47616e+07	21.89
High	Q9CYI4	Putative RNA-binding protein Luc7-like 1 OS=Mus musculus OX=10090 GN=Luc7l PE=1 SV=2	FALSE	TRUE	25.6065	8	8	4	1.17627e+07	19.45
High	A0A338P769	Septin 5 OS=Mus musculus OX=10090 GN=Sept5 PE=1 SV=1	FALSE	TRUE	21.4286	6	9	6	1.0381e+07	23.38
High	Q9CQ92	Mitochondrial fission 1 protein OS=Mus musculus OX=10090 GN=Fis1 PE=1 SV=1	FALSE	TRUE	32.2368	5	7	5	5.68509e+07	23.06
High	Q9WVE8	Protein kinase C and casein kinase substrate in neurons protein 2 OS=Mus musculus OX=10090 GN=Pacsin2 PE=1 SV=1	FALSE	TRUE	13.5802	6	8	6	3.92544e+07	21.89
High	Q91VJ2	Caveolae-associated protein 3 OS=Mus musculus OX=10090 GN=Cavin3 PE=1 SV=1	FALSE	TRUE	28.0769	7	9	7	1.36797e+08	21.25
High	Q3U6B1	Uncharacterized protein (Fragment) OS=Mus musculus OX=10090 GN=G3bp2 PE=2 SV=1	FALSE	TRUE	13.8182	7	9	7	6.59234e+07	19.14
High	Q8BH95	Enoyl-CoA hydratase, mitochondrial OS=Mus musculus OX=10090 GN=Echs1 PE=1 SV=1	FALSE	TRUE	22.069	5	7	5	2.20312e+07	18.06
High	Q9CR16	Peptidyl-prolyl cis-trans isomerase D OS=Mus musculus OX=10090 GN=Ppid PE=1 SV=3	FALSE	TRUE	18.9189	8	10	8	1.37807e+08	25.51
High	O09012	Peroxisomal targeting signal 1 receptor OS=Mus musculus OX=10090 GN=Pex5 PE=1 SV=2	FALSE	TRUE	13.928	7	7	7	4.48539e+07	19.13
High	Q9CX34	Protein SGT1 homolog OS=Mus musculus OX=10090 GN=Sugt1 PE=1 SV=3	FALSE	TRUE	19.6429	5	8	5	7.87801e+07	22.96
High	O70310	Glycylpeptide N-tetradecanoyltransferase 1 OS=Mus musculus OX=10090 GN=Nmt1 PE=1 SV=1	FALSE	TRUE	18.1452	9	10	6	2.7506e+07	23.36
High	Q3ZBS7	Uncharacterized protein OS=Bos taurus GN=VTN PE=2 SV=1	TRUE	FALSE	17.2269	8	13	8	214002130	29.83
High	Q08943	FACT complex subunit SSRP1 OS=Mus musculus OX=10090 GN=Ssrp1 PE=1 SV=2	FALSE	TRUE	14.548	9	10	9	4.07423e+07	23.68
High	Q91VK1	Basic leucine zipper and W2 domain-containing protein 2 OS=Mus musculus OX=10090 GN=Bzw2 PE=1 SV=1	FALSE	TRUE	16.2291	8	9	5	2.56472e+07	21.25
High	Q3TK95	Uncharacterized protein OS=Mus musculus OX=10090 GN=Eif4e PE=1 SV=1	FALSE	TRUE	27.1889	5	6	5	3.58832e+07	17.19
High	Q60767	Lymphocyte antigen 75 OS=Mus musculus OX=10090 GN=Ly75 PE=1 SV=2	FALSE	TRUE	6.50029	11	11	11	3.07955e+07	22.83
High	ENSEMBL:ENSBTAP00000031900	(Bos taurus) 121 kDa protein [OS=Bos taurus]	TRUE	FALSE	8.17669	7	9	6	2.0403e+07	23.34
High	P61089	Ubiquitin-conjugating enzyme E2 N OS=Mus musculus OX=10090 GN=Ube2n PE=1 SV=1	FALSE	TRUE	51.9737	7	9	7	2.11329e+08	21.34
High	A2A432	Cullin-4B OS=Mus musculus OX=10090 GN=Cul4b PE=1 SV=1	FALSE	TRUE	10.8247	10	10	7	3.81068e+07	20.03
High	Q14AX6	Cyclin-dependent kinase 12 OS=Mus musculus OX=10090 GN=Cdk12 PE=1 SV=2	FALSE	TRUE	7.4124	8	11	7	2.46825e+07	28.17
High	A0A1L1SQ51	Talin-2 OS=Mus musculus OX=10090 GN=Tln2 PE=1 SV=1	FALSE	TRUE	3.8522	9	9	1		21.58
High	Q3TX25	Aldehyde dehydrogenase OS=Mus musculus OX=10090 GN=Aldh3b1 PE=1 SV=1	FALSE	TRUE	17.5214	7	7	7	1.90632e+07	18.96
High	O35344	Importin subunit alpha-4 OS=Mus musculus OX=10090 GN=Kpna3 PE=1 SV=1	FALSE	TRUE	12.476	5	7	4	5.11372e+07	19.95
High	D3Z7P3	Glutaminase kidney isoform, mitochondrial OS=Mus musculus OX=10090 GN=Gls PE=1 SV=1	FALSE	TRUE	12.4629	6	7	6	1.58386e+07	19.77
High	Q8BTS4	Nuclear pore complex protein Nup54 OS=Mus musculus OX=10090 GN=Nup54 PE=1 SV=1	FALSE	TRUE	15.8824	6	7	6	1.93899e+07	19.43
High	Q9DB79	Ribosomal_S17_N domain-containing protein OS=Mus musculus OX=10090 GN=Rps11 PE=2 SV=1	FALSE	TRUE	43.3735	8	9	8	1.14125e+08	22.27
High	Q8K2T1	NmrA-like family domain-containing protein 1 OS=Mus musculus OX=10090 GN=Nmral1 PE=1 SV=1	FALSE	TRUE	21.0356	6	9	6	1.6283e+07	22.05
High	Q7TNV0	Protein DEK OS=Mus musculus OX=10090 GN=Dek PE=1 SV=1	FALSE	TRUE	18.6842	6	6	6	5.79453e+07	14.19
High	Q9D1P4	Cysteine and histidine-rich domain-containing protein 1 OS=Mus musculus OX=10090 GN=Chordc1 PE=1 SV=1	FALSE	TRUE	19.0332	4	5	4	5.01173e+07	13.81
High	Q05CR3	Plec1 protein (Fragment) OS=Mus musculus OX=10090 GN=Plec PE=2 SV=1	FALSE	TRUE	19.7309	12	13	1		20.76
High	P61750	ADP-ribosylation factor 4 OS=Mus musculus OX=10090 GN=Arf4 PE=1 SV=2	FALSE	TRUE	38.8889	6	9	2	1.90117e+08	27.2
High	Q5BLK1	40S ribosomal protein S6 OS=Mus musculus OX=10090 GN=Rps6 PE=1 SV=1	FALSE	TRUE	20.4819	5	6	5	3.22921e+08	19.23
High	Q52L50	RAS related protein 1b OS=Mus musculus OX=10090 GN=Rap1b PE=1 SV=1	FALSE	TRUE	36.9565	6	7	2	2.95091e+07	16.94
High	Q9D903	Probable rRNA-processing protein EBP2 OS=Mus musculus OX=10090 GN=Ebna1bp2 PE=2 SV=1	FALSE	TRUE	30.3922	8	8	8	3.48031e+07	19.09
High	Q9CY57	Chromatin target of PRMT1 protein OS=Mus musculus OX=10090 GN=Chtop PE=1 SV=2	FALSE	TRUE	28.1124	5	6	5	8.97129e+07	21.08
High	P47713	Cytosolic phospholipase A2 OS=Mus musculus OX=10090 GN=Pla2g4a PE=1 SV=1	FALSE	TRUE	14.1711	10	11	10	3.26978e+07	21.86
High	Q60967	Bifunctional 3'-phosphoadenosine 5'-phosphosulfate synthase 1 OS=Mus musculus OX=10090 GN=Papss1 PE=1 SV=1	FALSE	TRUE	15.5449	8	8	7	2.46743e+07	18.34
High	G3X928	SEC23-interacting protein OS=Mus musculus OX=10090 GN=Sec23ip PE=1 SV=1	FALSE	TRUE	8.91784	8	8	8	15511303	20.67
High	Q9QZQ8	Core histone macro-H2A.1 OS=Mus musculus OX=10090 GN=H2afy PE=1 SV=3	FALSE	TRUE	26.0753	7	8	7	2.32559e+07	17.5
High	Q8BH80	Vesicle-associated membrane protein, associated protein B and C OS=Mus musculus OX=10090 GN=Vapb PE=1 SV=1	FALSE	TRUE	31.6872	7	10	6	9.6019e+07	27.95
High	Q8BXZ1	Protein disulfide-isomerase TMX3 OS=Mus musculus OX=10090 GN=Tmx3 PE=1 SV=2	FALSE	TRUE	21.2719	8	8	8	3.00857e+07	18.3
High	Q61081	Hsp90 co-chaperone Cdc37 OS=Mus musculus OX=10090 GN=Cdc37 PE=1 SV=1	FALSE	TRUE	24.5383	7	7	7	3.10053e+07	19.08
High	Q3UVI9	Uncharacterized protein OS=Mus musculus OX=10090 GN=Abcf2 PE=2 SV=1	FALSE	TRUE	13.8535	8	8	8	2.11806e+07	20.4
High	P17690	Beta-2-glycoprotein 1 OS=Bos taurus GN=APOH PE=1 SV=4	TRUE	FALSE	32.7536	8	9	8	9.83364e+07	23.96
High	Q80SW1	S-adenosylhomocysteine hydrolase-like protein 1 OS=Mus musculus OX=10090 GN=Ahcyl1 PE=1 SV=1	FALSE	TRUE	17.5472	8	9	2	1.53562e+07	19.71
High	E9PYH2	Cytosolic acyl coenzyme A thioester hydrolase OS=Mus musculus OX=10090 GN=Acot7 PE=1 SV=1	FALSE	TRUE	17.9688	5	6	5	1.38525e+08	20.33
High	A0A0R4J034	Pyridoxal-dependent decarboxylase domain-containing protein 1 OS=Mus musculus OX=10090 GN=Pdxdc1 PE=1 SV=1	FALSE	TRUE	12.4208	7	7	7	3.31512e+07	17.54
High	Q5BKS5	Hook homolog 3 (Drosophila) OS=Mus musculus OX=10090 GN=Hook3 PE=2 SV=1	FALSE	TRUE	8.88889	5	7	5	9.35432e+06	18.84
High	Q76LV0	Glutathione peroxidase OS=Mus musculus OX=10090 GN=Gpx4 PE=1 SV=2	FALSE	TRUE	22.5296	5	7	5	3.20946e+07	18.15
High	Q3TZP3	Uncharacterized protein OS=Mus musculus OX=10090 GN=Mta2 PE=2 SV=1	FALSE	TRUE	14.8204	10	10	7	3.59943e+07	17.82
High	ENSEMBL:ENSBTAP00000034412	(Bos taurus) similar to C4b-binding protein alpha chain [OS=Bos taurus]	TRUE	FALSE	39.6985	8	9	8	1.60209e+08	22.33
High	Q9JIX8	Apoptotic chromatin condensation inducer in the nucleus OS=Mus musculus OX=10090 GN=Acin1 PE=1 SV=3	FALSE	TRUE	6.50224	8	8	8	1.56052e+07	20.53
High	Q8K2B3	Succinate dehydrogenase [ubiquinone] flavoprotein subunit, mitochondrial OS=Mus musculus OX=10090 GN=Sdha PE=1 SV=1	FALSE	TRUE	15.8133	8	8	8	3.99141e+08	21.44
High	Q9DB20	ATP synthase subunit O, mitochondrial OS=Mus musculus OX=10090 GN=Atp5po PE=1 SV=1	FALSE	TRUE	35.6808	6	9	6	1.20571e+08	20.84
High	Q6ZQ84	MKIAA0617 protein (Fragment) OS=Mus musculus OX=10090 GN=mKIAA0617 PE=3 SV=1	FALSE	TRUE	9.59596	7	8	7	1.3304e+07	20.02
High	Q8C166	Copine-1 OS=Mus musculus OX=10090 GN=Cpne1 PE=1 SV=1	FALSE	TRUE	16.6045	9	9	9	1.05217e+08	20.17
High	Q9R0E1	Multifunctional procollagen lysine hydroxylase and glycosyltransferase LH3 OS=Mus musculus OX=10090 GN=Plod3 PE=1 SV=1	FALSE	TRUE	14.17	10	13	10	8.92684e+07	25.39
High	P63280	SUMO-conjugating enzyme UBC9 OS=Mus musculus OX=10090 GN=Ube2i PE=1 SV=1	TRUE	TRUE	34.1772	6	9	6	1.43138e+08	19.83
High	P63028	Translationally-controlled tumor protein OS=Mus musculus OX=10090 GN=Tpt1 PE=1 SV=1	FALSE	TRUE	27.3256	4	6	4	9.40836e+07	14.35
High	A0A2X0SSA9	ARHGAP1 (Fragment) OS=Mus musculus OX=10090 GN=ARHGAP1 PE=4 SV=1	FALSE	TRUE	13.8322	6	7	5	5.77622e+07	16.71
High	Q07417	Short-chain specific acyl-CoA dehydrogenase, mitochondrial OS=Mus musculus OX=10090 GN=Acads PE=1 SV=2	FALSE	TRUE	23.7864	8	9	8	4.04827e+07	22.68
High	Q3TIX9	U4/U6.U5 tri-snRNP-associated protein 2 OS=Mus musculus OX=10090 GN=Usp39 PE=1 SV=2	FALSE	TRUE	15.6028	7	8	7	2.74072e+07	20.46
High	B1AUX2	Host cell factor 1 OS=Mus musculus OX=10090 GN=Hcfc1 PE=1 SV=1	FALSE	TRUE	5.21531	9	9	9	4.56818e+07	20.98
High	Q8R5C5	Beta-centractin OS=Mus musculus OX=10090 GN=Actr1b PE=1 SV=1	FALSE	TRUE	23.9362	7	10	2	6.62919e+06	24.18
High	O70311	Glycylpeptide N-tetradecanoyltransferase 2 OS=Mus musculus OX=10090 GN=Nmt2 PE=1 SV=1	FALSE	TRUE	15.879	7	8	4	3.1152e+07	19.33
High	Q546G4	Serum albumin OS=Mus musculus OX=10090 GN=Alb PE=1 SV=1	FALSE	TRUE	8.55263	4	13	1	1188902188	31.55
High	P47963	60S ribosomal protein L13 OS=Mus musculus OX=10090 GN=Rpl13 PE=1 SV=3	FALSE	TRUE	36.019	8	11	8	6.56048e+08	24.38
High	Q3ULG4	VWFA domain-containing protein OS=Mus musculus OX=10090 GN=Psmd4 PE=2 SV=1	FALSE	TRUE	19.2612	6	7	1	4.69314e+06	19.04
High	Q544D4	Sarcoglycan, delta (Dystrophin-associated glycoprotein) OS=Mus musculus OX=10090 GN=Sgcd PE=1 SV=1	FALSE	TRUE	25.2595	6	7	6	9.98215e+07	17.64
High	Q8K232	Adducin 1 (Alpha) OS=Mus musculus OX=10090 GN=Add1 PE=2 SV=1	FALSE	TRUE	13.6054	8	8	8	2.0467e+07	22.09
High	A0A2I3BRL8	Predicted gene 7324 OS=Mus musculus OX=10090 GN=Gm7324 PE=4 SV=1	FALSE	TRUE	22.6804	8	9	8	8.71891e+07	19.52
High	P48453	Serine/threonine-protein phosphatase 2B catalytic subunit beta isoform OS=Mus musculus OX=10090 GN=Ppp3cb PE=1 SV=2	FALSE	TRUE	14.6667	7	8	2	1.11282e+07	20.68
High	Q99LB6	Methionine adenosyltransferase 2 subunit beta OS=Mus musculus OX=10090 GN=Mat2b PE=1 SV=1	FALSE	TRUE	27.5449	7	8	7	2.09082e+07	23.18
High	Q3U8B3	Replication protein A subunit OS=Mus musculus OX=10090 GN=Rpa1 PE=2 SV=1	FALSE	TRUE	13.1988	7	9	7	1.75666e+07	20.8
High	Q3TCJ7	Uncharacterized protein OS=Mus musculus OX=10090 GN=Samhd1 PE=2 SV=1	FALSE	TRUE	15.1613	8	8	2	1.44826e+07	20.97
High	P16460	Argininosuccinate synthase OS=Mus musculus OX=10090 GN=Ass1 PE=1 SV=1	FALSE	TRUE	19.9029	10	11	10	132823912	20.76
High	A0A3Q4EI12	Ras-related protein Rab-18 OS=Mus musculus OX=10090 GN=Rab18 PE=1 SV=1	FALSE	TRUE	33.4906	6	7	6	85033510	20.89
High	Q69ZA1	Cyclin-dependent kinase 13 OS=Mus musculus OX=10090 GN=Cdk13 PE=1 SV=3	FALSE	TRUE	5.75778	7	11	6	3.17921e+07	26.66
High	E9PWE8	Dihydropyrimidinase-related protein 3 OS=Mus musculus OX=10090 GN=Dpysl3 PE=1 SV=1	FALSE	TRUE	14.7877	8	9	6	1.75592e+07	26.39
High	P05132	cAMP-dependent protein kinase catalytic subunit alpha OS=Mus musculus OX=10090 GN=Prkaca PE=1 SV=3	FALSE	TRUE	18.5185	7	8	3	1.57072e+07	21.05
High	Q6P069	Sorcin OS=Mus musculus OX=10090 GN=Sri PE=1 SV=1	FALSE	TRUE	34.8485	7	7	7	8.84189e+07	16.51
High	Q3UJI2	WD_REPEATS_REGION domain-containing protein OS=Mus musculus OX=10090 GN=Rbbp7 PE=2 SV=1	FALSE	TRUE	20.2353	6	6	4	4.35322e+07	16.27
High	P37913	DNA ligase 1 OS=Mus musculus OX=10090 GN=Lig1 PE=1 SV=2	FALSE	TRUE	12.0087	9	11	9	16692424	20.31
High	Q8C570	mRNA export factor OS=Mus musculus OX=10090 GN=Rae1 PE=1 SV=1	FALSE	TRUE	25	8	8	8	3.04056e+07	19.72
High	Q80UL3	Galactokinase 1 OS=Mus musculus OX=10090 GN=Galk1 PE=2 SV=1	FALSE	TRUE	24.2347	8	9	8	7.98229e+07	24.47
High	Q9WTX2	Interferon-inducible double-stranded RNA-dependent protein kinase activator A OS=Mus musculus OX=10090 GN=Prkra PE=1 SV=1	FALSE	TRUE	19.1693	5	7	5	5.27667e+07	19.4
High	A2ATU9	Histone acetyltransferase type B catalytic subunit OS=Mus musculus OX=10090 GN=Hat1 PE=1 SV=1	FALSE	TRUE	15.3664	6	6	6	4.93283e+07	16.53
High	B1AQZ0	Septin 8 OS=Mus musculus OX=10090 GN=Sept8 PE=1 SV=1	FALSE	TRUE	18.595	7	11	6	1.81317e+07	27.72
High	G5E8V9	ADP-ribosylation factor-interacting protein 1 OS=Mus musculus OX=10090 GN=Arfip1 PE=1 SV=1	FALSE	TRUE	20.9115	5	5	5	3.11092e+07	15.64
High	P22437	Prostaglandin G/H synthase 1 OS=Mus musculus OX=10090 GN=Ptgs1 PE=1 SV=1	FALSE	TRUE	14.1196	8	8	8	5.42047e+07	12.83
High	B1AR17	Chromodomain helicase DNA-binding protein 3 OS=Mus musculus OX=10090 GN=Chd3 PE=1 SV=1	FALSE	TRUE	4.18491	8	8	4	1.67333e+07	22.15
High	Q8VDM6	Heterogeneous nuclear ribonucleoprotein U-like protein 1 OS=Mus musculus OX=10090 GN=Hnrnpul1 PE=1 SV=1	FALSE	TRUE	11.8743	9	10	8	2.01098e+07	21.46
High	Q3UD06	ATP synthase subunit gamma OS=Mus musculus OX=10090 GN=Atp5c1 PE=1 SV=1	FALSE	TRUE	21.8121	6	7	6	9.64958e+07	15.5
High	O88712	C-terminal-binding protein 1 OS=Mus musculus OX=10090 GN=Ctbp1 PE=1 SV=2	FALSE	TRUE	13.3787	5	6	5	3.74042e+07	17
High	Q9CQ60	6-phosphogluconolactonase OS=Mus musculus OX=10090 GN=Pgls PE=1 SV=1	FALSE	TRUE	23.3463	5	7	5	3.9765e+07	18.56
High	Q05186	Reticulocalbin-1 OS=Mus musculus OX=10090 GN=Rcn1 PE=1 SV=1	FALSE	TRUE	29.5385	6	7	6	94945352	19.67
High	Q3TJD4	Uncharacterized protein OS=Mus musculus OX=10090 GN=Atp5pb PE=2 SV=1	FALSE	TRUE	22.2656	6	7	6	1.96148e+08	19.05
High	Q9CY73	39S ribosomal protein L44, mitochondrial OS=Mus musculus OX=10090 GN=Mrpl44 PE=1 SV=3	FALSE	TRUE	23.7237	6	10	6	3.01113e+07	28.3
High	P08730	Keratin, type I cytoskeletal 13 OS=Mus musculus OX=10090 GN=Krt13 PE=1 SV=2	FALSE	TRUE	10.984	7	23	1	1.82433e+07	50.81
High	Q9WVJ2	26S proteasome non-ATPase regulatory subunit 13 OS=Mus musculus OX=10090 GN=Psmd13 PE=1 SV=1	FALSE	TRUE	27.9255	11	12	11	1.30332e+08	18.01
High	Q6GSS7	Histone H2A type 2-A OS=Mus musculus OX=10090 GN=Hist2h2aa1 PE=1 SV=3	FALSE	TRUE	35.3846	5	55	1		105.72
High	Q60598	Src substrate cortactin OS=Mus musculus OX=10090 GN=Cttn PE=1 SV=2	FALSE	TRUE	13.37	7	7	7	2.27158e+07	13.91
High	G3UWS4	Serine/threonine-protein phosphatase 2A 65 kDa regulatory subunit A beta isoform OS=Mus musculus OX=10090 GN=Ppp2r1b PE=1 SV=1	FALSE	TRUE	12.1037	7	8	4	1.00015e+07	19.97
High	Q9DBR1	5'-3' exoribonuclease 2 OS=Mus musculus OX=10090 GN=Xrn2 PE=1 SV=1	FALSE	TRUE	10.0946	7	7	7	1.31651e+07	17.42
High	Q9JIG7	Coiled-coil domain-containing protein 22 OS=Mus musculus OX=10090 GN=Ccdc22 PE=1 SV=1	FALSE	TRUE	19.6172	10	14	10	2.0994e+07	28.84
High	G3UXL2	Phosphoribosyl pyrophosphate synthetase 1-like 3 OS=Mus musculus OX=10090 GN=Prps1l3 PE=3 SV=1	FALSE	TRUE	23.5849	6	6	6	1.59217e+07	17.06
High	Q3UXI9	Uncharacterized protein OS=Mus musculus OX=10090 GN=Ilf2 PE=2 SV=1	FALSE	TRUE	20	6	7	6	5.74521e+07	18.2
High	Q544Z7	DNA-(apurinic or apyrimidinic site) lyase OS=Mus musculus OX=10090 GN=Apex1 PE=1 SV=1	FALSE	TRUE	21.4511	5	5	5	1.66221e+07	12.47
High	Q9JIP6	Frizzled-2 OS=Mus musculus OX=10090 GN=Fzd2 PE=2 SV=1	FALSE	TRUE	12.807	6	8	4	9.62499e+07	15.7
High	B2RUC7	Serine/threonine kinase receptor associated protein OS=Mus musculus OX=10090 GN=Strap PE=1 SV=1	FALSE	TRUE	28	8	8	8	2.38132e+07	18.5
High	Q8K0C4	Lanosterol 14-alpha demethylase OS=Mus musculus OX=10090 GN=Cyp51a1 PE=1 SV=1	FALSE	TRUE	19.0855	9	10	9	4.10618e+07	18.52
High	Q3TWB8	Transmembrane 9 superfamily member OS=Mus musculus OX=10090 GN=Tm9sf2 PE=2 SV=1	FALSE	TRUE	8.20896	4	7	4	1.99847e+07	21.08
High	P62242	40S ribosomal protein S8 OS=Mus musculus OX=10090 GN=Rps8 PE=1 SV=2	FALSE	TRUE	38.4615	7	8	7	9.33171e+07	22.71
High	Q3UUU2	Far upstream element-binding protein 1 OS=Mus musculus OX=10090 GN=Fubp1 PE=1 SV=1	FALSE	TRUE	13.4286	9	11	7	5.63308e+07	23.46
High	P97314	Cysteine and glycine-rich protein 2 OS=Mus musculus OX=10090 GN=Csrp2 PE=1 SV=3	FALSE	TRUE	27.4611	4	5	4	4.17145e+07	14.35
High	Q9CZ04	COP9 signalosome complex subunit 7a OS=Mus musculus OX=10090 GN=Cops7a PE=1 SV=2	FALSE	TRUE	24.7273	5	6	5	4.88072e+07	18.23
High	P47738	Aldehyde dehydrogenase, mitochondrial OS=Mus musculus OX=10090 GN=Aldh2 PE=1 SV=1	FALSE	TRUE	17.5337	8	8	8	5.34242e+07	21.13
High	O35188	Fractalkine OS=Mus musculus OX=10090 GN=Cx3cl1 PE=1 SV=3	FALSE	TRUE	15.9494	6	7	6	1.36426e+08	16.96
High	Q5QGZ6	Retinoic acid induced 1 OS=Mus musculus OX=10090 GN=Rai1 PE=2 SV=1	FALSE	TRUE	5.982	8	8	8	2.09315e+07	21.53
High	O08539	Myc box-dependent-interacting protein 1 OS=Mus musculus OX=10090 GN=Bin1 PE=1 SV=1	FALSE	TRUE	13.9456	6	6	6	2.88884e+07	16.62
High	O08599	Syntaxin-binding protein 1 OS=Mus musculus OX=10090 GN=Stxbp1 PE=1 SV=2	FALSE	TRUE	13.6364	6	6	6	5.14683e+06	16.15
High	Q3TQR3	W2 domain-containing protein OS=Mus musculus OX=10090 GN=Eif5 PE=1 SV=1	FALSE	TRUE	19.1142	7	7	7	2.82658e+07	16.94
High	P52795	Ephrin-B1 OS=Mus musculus OX=10090 GN=Efnb1 PE=1 SV=1	FALSE	TRUE	27.2464	8	9	8	6.0438e+07	18.61
High	A0A0R4J0R1	Vesicle-associated membrane protein 8 OS=Mus musculus OX=10090 GN=Vamp8 PE=1 SV=1	FALSE	TRUE	40.5941	5	7	5	1.04249e+08	19.17
High	Q8BG15	CTD small phosphatase-like protein 2 OS=Mus musculus OX=10090 GN=Ctdspl2 PE=1 SV=1	FALSE	TRUE	14.6237	7	8	7	5.9727e+07	22.39
High	A2AB79	Histone H2A OS=Mus musculus OX=10090 GN=H2aw PE=2 SV=1	FALSE	TRUE	35.3846	5	55	1	21318334	105.24
High	A0A5F8MPN8	Malate dehydrogenase, cytoplasmic OS=Mus musculus OX=10090 GN=Mdh1 PE=4 SV=1	FALSE	TRUE	22.5352	6	7	6	46137606	17.84
High	B1AX39	Zinc finger CCHC domain-containing protein 7 OS=Mus musculus OX=10090 GN=Zcchc7 PE=2 SV=1	FALSE	TRUE	16.0813	8	8	8	6.70371e+07	17.76
High	Q60972	Histone-binding protein RBBP4 OS=Mus musculus OX=10090 GN=Rbbp4 PE=1 SV=5	FALSE	TRUE	12.2353	5	5	3	1.44127e+07	16.12
High	Q9CXW2	28S ribosomal protein S22, mitochondrial OS=Mus musculus OX=10090 GN=Mrps22 PE=1 SV=1	FALSE	TRUE	19.7772	7	8	7	3.14379e+07	20.54
High	P97370	Sodium/potassium-transporting ATPase subunit beta-3 OS=Mus musculus OX=10090 GN=Atp1b3 PE=1 SV=1	FALSE	TRUE	27.6978	7	10	7	1.18379e+08	22.31
High	O70252	Heme oxygenase 2 OS=Mus musculus OX=10090 GN=Hmox2 PE=1 SV=1	FALSE	TRUE	27.3016	7	7	7	1.7362e+07	17.77
High	Q99LG2	Transportin-2 OS=Mus musculus OX=10090 GN=Tnpo2 PE=1 SV=1	FALSE	TRUE	8.34273	7	7	2	33486040	11.36
High	Q7RTS7	Keratin, type II cytoskeletal 74 OS=Homo sapiens GN=KRT74 PE=1 SV=2	TRUE	TRUE	9.64083	8	17	2	6.06749e+08	43.21
High	Q80UT7	Rpl7a protein (Fragment) OS=Mus musculus OX=10090 GN=Rpl7a PE=2 SV=1	FALSE	TRUE	33.3333	10	11	10	1.29803e+08	26.07
High	Q3TYX3	SET and MYND domain-containing protein 5 OS=Mus musculus OX=10090 GN=Smyd5 PE=1 SV=2	FALSE	TRUE	15.1442	5	7	5	5.24596e+07	18.31
High	Q3UIQ2	Uncharacterized protein OS=Mus musculus OX=10090 GN=Ndufs1 PE=2 SV=1	FALSE	TRUE	11.5543	7	8	7	1.41428e+07	17.48
High	Q9D937	Uncharacterized protein C11orf98 homolog OS=Mus musculus OX=10090 PE=1 SV=1	FALSE	TRUE	43.9024	7	10	6	1.40777e+08	25.08
High	Q64514	Tripeptidyl-peptidase 2 OS=Mus musculus OX=10090 GN=Tpp2 PE=1 SV=3	FALSE	TRUE	10.0634	9	9	9	1.51659e+07	22.71
High	Q8BMA6	Signal recognition particle subunit SRP68 OS=Mus musculus OX=10090 GN=Srp68 PE=1 SV=2	FALSE	TRUE	12.64	6	6	6	1.14362e+07	15.75
High	Q99J57	S-adenosylmethionine synthase OS=Mus musculus OX=10090 GN=Mat2a PE=1 SV=1	FALSE	TRUE	18.2278	6	6	6	8.62021e+07	12.34
High	O08749	Dihydrolipoyl dehydrogenase, mitochondrial OS=Mus musculus OX=10090 GN=Dld PE=1 SV=2	FALSE	TRUE	14.3418	6	6	6	3.64929e+07	16.09
High	P70207	Plexin-A2 OS=Mus musculus OX=10090 GN=Plxna2 PE=1 SV=2	FALSE	TRUE	4.69905	8	8	4	8.72545e+06	18.38
High	Q01853	Transitional endoplasmic reticulum ATPase OS=Mus musculus OX=10090 GN=Vcp PE=1 SV=4	FALSE	TRUE	12.1588	8	8	8	2.32831e+07	21.1
High	P97868	E3 ubiquitin-protein ligase RBBP6 OS=Mus musculus OX=10090 GN=Rbbp6 PE=1 SV=5	FALSE	TRUE	4.86034	7	8	7	2.05329e+07	17.38
High	D3Z0M9	DEAD (Asp-Glu-Ala-Asp) box polypeptide 23 OS=Mus musculus OX=10090 GN=Ddx23 PE=1 SV=1	FALSE	TRUE	13.7973	12	12	12	3.6249e+07	23.43
High	A0A140T8T4	Ribosomal protein L9, pseudogene 6 OS=Mus musculus OX=10090 GN=Rpl9-ps6 PE=4 SV=1	FALSE	TRUE	28.6458	5	7	5	6.52242e+07	21.76
High	P25976	Nucleolar transcription factor 1 OS=Mus musculus OX=10090 GN=Ubtf PE=1 SV=1	FALSE	TRUE	9.54248	7	7	7	2.63504e+07	18.64
High	E9PZF0	Nucleoside diphosphate kinase OS=Mus musculus OX=10090 GN=Gm20390 PE=3 SV=1	FALSE	TRUE	36.7041	5	9	2	1.06696e+08	16.96
High	Q58E70	Tpm3 protein OS=Mus musculus OX=10090 GN=Tpm3 PE=2 SV=1	FALSE	TRUE	25.8065	7	7	5	1.59475e+07	18.18
High	O88545	COP9 signalosome complex subunit 6 OS=Mus musculus OX=10090 GN=Cops6 PE=1 SV=1	FALSE	TRUE	16.358	5	7	5	3.00836e+07	15.67
High	P63242	Eukaryotic translation initiation factor 5A-1 OS=Mus musculus OX=10090 GN=Eif5a PE=1 SV=2	FALSE	TRUE	31.8182	5	9	3	9.91798e+07	20.39
High	A2RSP9	Reck protein OS=Mus musculus OX=10090 GN=Reck PE=2 SV=1	FALSE	TRUE	6.69413	6	6	6	2.87604e+07	14.4
High	P47911	60S ribosomal protein L6 OS=Mus musculus OX=10090 GN=Rpl6 PE=1 SV=3	FALSE	TRUE	28.3784	10	10	10	1.85026e+08	18.66
High	O35857	Mitochondrial import inner membrane translocase subunit TIM44 OS=Mus musculus OX=10090 GN=Timm44 PE=1 SV=2	FALSE	TRUE	17.9204	7	7	7	6.78976e+07	17.52
High	P21279	Guanine nucleotide-binding protein G(q) subunit alpha OS=Mus musculus OX=10090 GN=Gnaq PE=1 SV=4	FALSE	TRUE	22.5627	7	8	2	1.39049e+07	18.54
High	P37804	Transgelin OS=Mus musculus OX=10090 GN=Tagln PE=1 SV=3	FALSE	TRUE	44.2786	8	8	8	3.39624e+07	18.12
High	Q8K124	Pleckstrin homology domain-containing family O member 2 OS=Mus musculus OX=10090 GN=Plekho2 PE=1 SV=1	FALSE	TRUE	17.3737	5	5	5	2.14475e+07	16.32
High	A2AM97	Ribosomal protein 10 OS=Mus musculus OX=10090 GN=RP23-436K3.4-001 PE=4 SV=1	FALSE	TRUE	29.4393	7	12	7	4.29628e+08	27.21
High	P18872	Guanine nucleotide-binding protein G(o) subunit alpha OS=Mus musculus OX=10090 GN=Gnao1 PE=1 SV=3	FALSE	TRUE	20.339	7	9	5	2.04598e+07	20.77
High	Q9ESZ8	General transcription factor II-I OS=Mus musculus OX=10090 GN=Gtf2i PE=1 SV=3	FALSE	TRUE	7.71543	6	6	6	2.39419e+07	17.22
High	E9Q317	Histone deacetylase complex subunit SAP18 OS=Mus musculus OX=10090 GN=Sap18 PE=1 SV=1	FALSE	TRUE	31.3953	7	7	7	2.22287e+08	17.08
High	Q9Z1A1	TFG protein OS=Mus musculus OX=10090 GN=Tfg PE=1 SV=1	FALSE	TRUE	19.3955	4	7	4	5.5569e+07	21.89
High	Q3TJH1	Uncharacterized protein OS=Mus musculus OX=10090 GN=Gnai3 PE=2 SV=1	FALSE	TRUE	22.3164	8	10	3	4.22875e+07	18.36
High	Q9R0X4	Acyl-coenzyme A thioesterase 9, mitochondrial OS=Mus musculus OX=10090 GN=Acot9 PE=1 SV=1	FALSE	TRUE	22.779	10	11	10	4.13152e+07	22.27
High	Q3TZI7	Major prion protein OS=Mus musculus OX=10090 GN=Prnp PE=2 SV=1	FALSE	TRUE	17.7165	4	10	4	1.44382e+09	29.06
High	P14069	Protein S100-A6 OS=Mus musculus OX=10090 GN=S100a6 PE=1 SV=3	FALSE	TRUE	30.3371	4	20	4	1.34846e+10	34.56
High	P97315	Cysteine and glycine-rich protein 1 OS=Mus musculus OX=10090 GN=Csrp1 PE=1 SV=3	FALSE	TRUE	36.7876	4	6	4	4.19908e+07	18.09
High	Q922W5	Pyrroline-5-carboxylate reductase 1, mitochondrial OS=Mus musculus OX=10090 GN=Pycr1 PE=1 SV=1	FALSE	TRUE	25.89	6	7	3	6.63455e+06	17.96
High	Q9EP71	Ankycorbin OS=Mus musculus OX=10090 GN=Rai14 PE=1 SV=1	FALSE	TRUE	6.43514	6	6	6	1.59273e+07	14.03
High	Q68FL4	Putative adenosylhomocysteinase 3 OS=Mus musculus OX=10090 GN=Ahcyl2 PE=1 SV=1	FALSE	TRUE	12.0718	7	8	1		15.98
High	E0CYV0	Protein-L-isoaspartate O-methyltransferase OS=Mus musculus OX=10090 GN=Pcmt1 PE=1 SV=1	FALSE	TRUE	23.7762	5	7	5	5.37732e+07	22.29
High	Q922P8	Transmembrane protein 132A OS=Mus musculus OX=10090 GN=Tmem132a PE=1 SV=2	FALSE	TRUE	9.52849	7	8	7	4.21432e+06	21.68
High	Q8CHP8	Glycerol-3-phosphate phosphatase OS=Mus musculus OX=10090 GN=Pgp PE=1 SV=1	FALSE	TRUE	23.676	6	6	6	7.07614e+07	17.73
High	P30681	High mobility group protein B2 OS=Mus musculus OX=10090 GN=Hmgb2 PE=1 SV=3	FALSE	TRUE	23.3333	6	10	6	7.81798e+07	29.23
High	Q4VBD9	GDNF-inducible zinc finger protein 1 OS=Mus musculus OX=10090 GN=Gzf1 PE=1 SV=2	FALSE	TRUE	11.898	7	7	7	5.04971e+07	17.4
High	Q6PE01	U5 small nuclear ribonucleoprotein 40 kDa protein OS=Mus musculus OX=10090 GN=Snrnp40 PE=1 SV=1	FALSE	TRUE	25.419	6	6	6	1.32308e+07	14.32
High	Q8JZN5	Complex I assembly factor ACAD9, mitochondrial OS=Mus musculus OX=10090 GN=Acad9 PE=1 SV=2	FALSE	TRUE	13.92	7	7	7	4.61853e+07	17.84
High	P33610	DNA primase large subunit OS=Mus musculus OX=10090 GN=Prim2 PE=1 SV=1	FALSE	TRUE	12.2772	5	5	5	4.12931e+06	13.89
High	P70460	Vasodilator-stimulated phosphoprotein OS=Mus musculus OX=10090 GN=Vasp PE=1 SV=4	FALSE	TRUE	30.9333	9	10	9	4.8328e+07	23.55
High	Q9CYL5	Golgi-associated plant pathogenesis-related protein 1 OS=Mus musculus OX=10090 GN=Glipr2 PE=1 SV=3	FALSE	TRUE	38.961	5	6	5	74307589	15.42
High	Q3UE37	Ubiquitin-conjugating enzyme E2 Z OS=Mus musculus OX=10090 GN=Ube2z PE=1 SV=2	FALSE	TRUE	21.9101	7	8	7	1.82092e+08	18.04
High	O88456	Calpain small subunit 1 OS=Mus musculus OX=10090 GN=Capns1 PE=1 SV=1	FALSE	TRUE	21.1896	6	9	6	2.05629e+08	22.72
High	A0A1W2P7Q9	Myosin light polypeptide 6 OS=Mus musculus OX=10090 GN=Myl6 PE=1 SV=1	FALSE	TRUE	37.9747	6	6	6	2.82191e+08	17.76
High	E9QN12	Platelet-derived growth factor receptor beta OS=Mus musculus OX=10090 GN=Pdgfrb PE=1 SV=1	FALSE	TRUE	5.62103	5	5	5	8.48267e+06	13.76
High	Q4V9X0	Ppp3ca protein OS=Mus musculus OX=10090 GN=Ppp3ca PE=2 SV=1	FALSE	TRUE	32	7	7	1	4.34847e+07	15.85
High	Q91V61	Sideroflexin-3 OS=Mus musculus OX=10090 GN=Sfxn3 PE=1 SV=1	FALSE	TRUE	21.8069	6	8	5	1.449e+07	15.99
High	O70421	Frizzled-1 OS=Mus musculus OX=10090 GN=Fzd1 PE=1 SV=3	FALSE	TRUE	6.85358	4	5	3	3.10954e+07	13.66
High	Q8VDF2	E3 ubiquitin-protein ligase UHRF1 OS=Mus musculus OX=10090 GN=Uhrf1 PE=1 SV=2	FALSE	TRUE	11.509	8	10	8	1.8776e+07	19.12
High	Q80TT4	MKIAA0719 protein (Fragment) OS=Mus musculus OX=10090 GN=Tomm70a PE=2 SV=1	FALSE	TRUE	14.8562	9	12	9	8.84755e+07	27.8
High	P02754	Beta-lactoglobulin OS=Bos taurus GN=LGB PE=1 SV=3	TRUE	FALSE	25.8427	6	7	6	1.33936e+08	16.11
High	O08738	Caspase-6 OS=Mus musculus OX=10090 GN=Casp6 PE=1 SV=1	FALSE	TRUE	26.087	7	9	6	36618893	20.99
High	O35640	Annexin A8 OS=Mus musculus OX=10090 GN=Anxa8 PE=1 SV=2	FALSE	TRUE	23.8532	6	6	6	2.27609e+07	15.77
High	O35566	CD151 antigen OS=Mus musculus OX=10090 GN=Cd151 PE=1 SV=2	FALSE	TRUE	9.88142	2	4	2	5.66768e+07	10.6
High	Q91YR7	Pre-mRNA-processing factor 6 OS=Mus musculus OX=10090 GN=Prpf6 PE=1 SV=1	FALSE	TRUE	9.98937	8	9	8	1.76232e+07	23.83
High	Q9D024	Coiled-coil domain-containing protein 47 OS=Mus musculus OX=10090 GN=Ccdc47 PE=1 SV=2	FALSE	TRUE	14.4928	6	6	6	8.06745e+06	14.32
High	Q8C5C0	Uncharacterized protein OS=Mus musculus OX=10090 GN=Samhd1 PE=2 SV=1	FALSE	TRUE	16.8784	7	8	1	2.94056e+06	22.63
High	Q00993	Tyrosine-protein kinase receptor UFO OS=Mus musculus OX=10090 GN=Axl PE=1 SV=2	FALSE	TRUE	11.5991	8	8	8	1.53229e+07	20.82
High	Q9JIK9	28S ribosomal protein S34, mitochondrial OS=Mus musculus OX=10090 GN=Mrps34 PE=1 SV=1	FALSE	TRUE	33.4862	7	8	7	5.25653e+07	16.44
High	Q7TSV2	Sodium/hydrogen exchanger OS=Mus musculus OX=10090 GN=Slc9a1 PE=2 SV=1	FALSE	TRUE	9.96355	5	6	5	2.84082e+07	15.59
High	O54825	Bystin OS=Mus musculus OX=10090 GN=Bysl PE=1 SV=3	FALSE	TRUE	21.1009	8	8	8	1.26679e+07	13
High	Q3TC45	EF-hand domain-containing protein OS=Mus musculus OX=10090 GN=S100a10 PE=1 SV=1	FALSE	TRUE	27.8351	3	9	3	2.32582e+08	25.96
High	Q9CX86	Heterogeneous nuclear ribonucleoprotein A0 OS=Mus musculus OX=10090 GN=Hnrnpa0 PE=1 SV=1	FALSE	TRUE	21.9672	5	7	4	8.56347e+07	20.77
High	Q3UJY1	Uncharacterized protein OS=Mus musculus OX=10090 GN=Slc29a1 PE=2 SV=1	FALSE	TRUE	11.5217	5	8	5	6.76754e+07	20.22
High	Q9D8S5	Serine/arginine-rich-splicing factor 5 OS=Mus musculus OX=10090 GN=Srsf5 PE=1 SV=1	FALSE	TRUE	18.5185	4	7	3	2.2748e+07	20.98
High	Q8BJS4	SUN domain-containing protein 2 OS=Mus musculus OX=10090 GN=Sun2 PE=1 SV=3	FALSE	TRUE	10.8071	7	7	7	2.29001e+07	15.46
High	Q64669	NAD(P)H dehydrogenase [quinone] 1 OS=Mus musculus OX=10090 GN=Nqo1 PE=1 SV=3	FALSE	TRUE	23.7226	8	8	8	1.58295e+08	18.65
High	Q58DZ3	Ribosomal protein L30 OS=Mus musculus OX=10090 GN=Rpl30 PE=1 SV=1	FALSE	TRUE	48.6957	5	6	5	2.43219e+08	14
High	Q8R4R6	Nucleoporin NUP35 OS=Mus musculus OX=10090 GN=Nup35 PE=1 SV=2	FALSE	TRUE	23.0769	5	6	5	2.03307e+07	15.86
High	O35593	26S proteasome non-ATPase regulatory subunit 14 OS=Mus musculus OX=10090 GN=Psmd14 PE=1 SV=2	FALSE	TRUE	16.129	4	5	4	7.413e+07	14.93
High	Q8K019	Bcl-2-associated transcription factor 1 OS=Mus musculus OX=10090 GN=Bclaf1 PE=1 SV=2	FALSE	TRUE	6.52884	5	7	4	5.62522e+07	12.65
High	P24527	Leukotriene A-4 hydrolase OS=Mus musculus OX=10090 GN=Lta4h PE=1 SV=4	FALSE	TRUE	11.6203	6	6	6	2.62906e+07	15.3
High	A0A087WNT1	Elongin-C OS=Mus musculus OX=10090 GN=Eloc PE=1 SV=1	FALSE	TRUE	48.5075	5	7	5	3.84693e+07	15.62
High	Q6GQT9	Nodal modulator 1 OS=Mus musculus OX=10090 GN=Nomo1 PE=1 SV=1	FALSE	TRUE	8.48435	9	9	9	1.3111e+07	20.59
High	P39053	Dynamin-1 OS=Mus musculus OX=10090 GN=Dnm1 PE=1 SV=2	FALSE	TRUE	7.1511	7	7	3	9.98048e+06	16.79
High	P35235	Tyrosine-protein phosphatase non-receptor type 11 OS=Mus musculus OX=10090 GN=Ptpn11 PE=1 SV=3	FALSE	TRUE	16.8634	9	9	9	2.41875e+07	21.19
High	Q8BFY6	Peflin OS=Mus musculus OX=10090 GN=Pef1 PE=1 SV=1	FALSE	TRUE	17.4545	5	6	5	2.2043e+07	15.83
High	Q5BLK2	Ribosomal protein S20 OS=Mus musculus OX=10090 GN=Rps20 PE=1 SV=1	FALSE	TRUE	28.5714	4	7	4	1.2714e+09	19.98
High	P11679	Keratin, type II cytoskeletal 8 OS=Mus musculus OX=10090 GN=Krt8 PE=1 SV=4	FALSE	TRUE	6.73469	8	18	1	1.37184e+08	44.42
High	Q3TH64	Cytochrome b5 heme-binding domain-containing protein OS=Mus musculus OX=10090 GN=Cyb5b PE=2 SV=1	FALSE	TRUE	31.5068	4	7	4	4.90828e+07	14.12
High	O08915	AH receptor-interacting protein OS=Mus musculus OX=10090 GN=Aip PE=1 SV=1	FALSE	TRUE	16.9697	4	5	4	2.37418e+07	14.37
High	Q3UK61	Succinyl-CoA:3-ketoacid-coenzyme A transferase OS=Mus musculus OX=10090 GN=Oxct1 PE=2 SV=1	FALSE	TRUE	18.4615	8	8	8	1.02393e+08	19.38
High	Q0PD53	Rab6B OS=Mus musculus OX=10090 GN=Rab6b PE=1 SV=1	FALSE	TRUE	31.7308	6	8	1	1.87035e+07	18.89
High	Q3TX72	Peptidylprolyl isomerase OS=Mus musculus OX=10090 GN=Fkbp5 PE=2 SV=1	FALSE	TRUE	16.2281	6	7	6	4.55095e+07	18.51
High	Q3TEU8	Coronin OS=Mus musculus OX=10090 GN=Coro1c PE=2 SV=1	FALSE	TRUE	18.1435	9	10	9	2.55381e+07	23.2
High	Q5CZY9	Rps16 protein OS=Mus musculus OX=10090 GN=Rps16 PE=2 SV=1	FALSE	TRUE	27.3256	6	10	6	2.6369e+08	20.96
High	Q99JY0	Trifunctional enzyme subunit beta, mitochondrial OS=Mus musculus OX=10090 GN=Hadhb PE=1 SV=1	FALSE	TRUE	17.8947	8	8	8	84863081	19.04
High	C5H0E8	Rap1A-retro1 OS=Mus musculus OX=10090 GN=Gm9392 PE=2 SV=1	FALSE	TRUE	29.8913	5	7	1	22681862	19.54
High	Q3TG75	Uncharacterized protein OS=Mus musculus OX=10090 GN=Oat PE=1 SV=1	FALSE	TRUE	14.8064	5	5	5	1.63564e+07	14
High	Q0GNC1	Inverted formin-2 OS=Mus musculus OX=10090 GN=Inf2 PE=1 SV=1	FALSE	TRUE	6.83425	8	8	8	3.74937e+07	20.7
High	P31324	cAMP-dependent protein kinase type II-beta regulatory subunit OS=Mus musculus OX=10090 GN=Prkar2b PE=1 SV=3	FALSE	TRUE	10.8173	3	5	3	1.96313e+07	15.96
High	A0A0R4J088	Tissue factor OS=Mus musculus OX=10090 GN=F3 PE=1 SV=1	FALSE	TRUE	17.0068	3	4	3	6.14272e+07	14.86
High	Q99LD8	N(G),N(G)-dimethylarginine dimethylaminohydrolase 2 OS=Mus musculus OX=10090 GN=Ddah2 PE=1 SV=1	FALSE	TRUE	26.6667	5	6	5	1.90459e+07	14.58
High	Q6PGB6	N-alpha-acetyltransferase 50 OS=Mus musculus OX=10090 GN=Naa50 PE=1 SV=1	FALSE	TRUE	27.8107	5	7	5	7.11443e+07	13.56
High	O35465	Peptidyl-prolyl cis-trans isomerase FKBP8 OS=Mus musculus OX=10090 GN=Fkbp8 PE=1 SV=2	FALSE	TRUE	20.6468	6	6	6	3.11984e+07	15.1
High	Q8R038	Melanocyte proliferating gene 1 OS=Mus musculus OX=10090 GN=Myg1 PE=2 SV=1	FALSE	TRUE	22.8947	7	7	7	3.78857e+07	19.05
High	E9QMK9	D-glutamate cyclase, mitochondrial OS=Mus musculus OX=10090 GN=Dglucy PE=1 SV=1	FALSE	TRUE	11.1283	6	7	6	1.47559e+07	20.44
High	Q9Z0Z4	Hephaestin OS=Mus musculus OX=10090 GN=Heph PE=1 SV=3	FALSE	TRUE	6.65514	6	6	6	1.57675e+07	11.07
High	Q8R138	Transmembrane protein 119 OS=Mus musculus OX=10090 GN=Tmem119 PE=1 SV=1	FALSE	TRUE	26.0714	5	8	5	1.40653e+08	21.31
High	Q3U944	L-type lectin-like domain-containing protein OS=Mus musculus OX=10090 GN=Lman1 PE=2 SV=1	FALSE	TRUE	12.7971	5	6	5	28375996	17.73
High	Q8CHG1	MKIAA0369 protein (Fragment) OS=Mus musculus OX=10090 GN=Dclk1 PE=2 SV=1	FALSE	TRUE	9.35525	7	9	7	8.53212e+07	17.05
High	Q9WUM5	Succinate--CoA ligase [ADP/GDP-forming] subunit alpha, mitochondrial OS=Mus musculus OX=10090 GN=Suclg1 PE=1 SV=4	FALSE	TRUE	14.1618	4	5	4	3.73217e+07	15.08
High	Q5SVP3	PA28 beta subunit OS=Mus musculus OX=10090 GN=PSME2b PE=1 SV=1	FALSE	TRUE	33.8912	8	8	8	6.91125e+07	15.03
High	A2RRJ4	Exportin 5 OS=Mus musculus OX=10090 GN=Xpo5 PE=2 SV=1	FALSE	TRUE	7.55814	8	8	8	20060957	17.74
High	Q3UKX3	Uncharacterized protein (Fragment) OS=Mus musculus OX=10090 GN=Stau1 PE=2 SV=1	FALSE	TRUE	13.6824	7	7	7	3.23067e+07	19.53
High	B9EKJ7	Tankyrase 1 binding protein 1 OS=Mus musculus OX=10090 GN=Tnks1bp1 PE=2 SV=1	FALSE	TRUE	7.26744	8	8	8	5.63462e+06	23.05
High	A0A0R4J104	Disabled homolog 2 OS=Mus musculus OX=10090 GN=Dab2 PE=1 SV=1	FALSE	TRUE	8.09399	5	5	5	1.201e+07	15.51
High	Q62150	RNA/DNA-binding protein OS=Mus musculus OX=10090 GN=Rnps1 PE=2 SV=1	FALSE	TRUE	21.3699	6	12	6	224179814	25.37
High	Q3TQ70	Beta1 subnuit of GTP-binding protein OS=Mus musculus OX=10090 GN=Gnb1 PE=1 SV=1	FALSE	TRUE	14.7059	4	7	2	60245726	18.53
High	Q3UJS6	Uncharacterized protein OS=Mus musculus OX=10090 GN=Cpne3 PE=2 SV=1	FALSE	TRUE	12.3827	6	6	5	2.77944e+07	14.63
High	Q14BM8	Protocadherin beta 16 OS=Mus musculus OX=10090 GN=Pcdhb16 PE=2 SV=1	FALSE	TRUE	7.10723	5	6	4	13565130	13.25
High	E9QPD7	Pyruvate carboxylase OS=Mus musculus OX=10090 GN=Pcx PE=1 SV=1	FALSE	TRUE	8.14249	8	8	8	8.16809e+06	15.88
High	A2AE27	AMP deaminase OS=Mus musculus OX=10090 GN=Ampd2 PE=1 SV=1	FALSE	TRUE	11.2864	9	9	9	2.4892e+07	15.19
High	Q91ZE0	Trimethyllysine dioxygenase, mitochondrial OS=Mus musculus OX=10090 GN=Tmlhe PE=1 SV=2	FALSE	TRUE	10.4513	4	5	4	1.51426e+07	13.6
High	P45377	Aldose reductase-related protein 2 OS=Mus musculus OX=10090 GN=Akr1b8 PE=1 SV=2	FALSE	TRUE	20.8861	6	8	6	2.50277e+07	15.01
High	Q9CRB2	H/ACA ribonucleoprotein complex subunit 2 OS=Mus musculus OX=10090 GN=Nhp2 PE=1 SV=1	FALSE	TRUE	41.1765	4	4	4	1.21106e+07	13.1
High	G3X9Q6	La-related protein 4 OS=Mus musculus OX=10090 GN=Larp4 PE=1 SV=1	FALSE	TRUE	12.7955	8	9	8	4.59768e+07	18.9
High	Q684Q9	Ubiquitin-like protein GDX (Fragment) OS=Mus musculus OX=10090 PE=2 SV=1	FALSE	TRUE	45.3488	7	7	7	3.72566e+07	13.42
High	Q6A0E3	MKIAA0031 protein (Fragment) OS=Mus musculus OX=10090 GN=Eftud2 PE=2 SV=1	FALSE	TRUE	11.5779	8	9	7	9.01111e+06	21.85
High	P21550	Beta-enolase OS=Mus musculus OX=10090 GN=Eno3 PE=1 SV=3	FALSE	TRUE	9.67742	3	8	1		25.57
High	A0A0N4SW28	Guanine nucleotide-binding protein subunit gamma OS=Mus musculus OX=10090 GN=Gng12 PE=1 SV=1	FALSE	TRUE	57.8313	4	5	4	1.55742e+08	15.09
High	Q3U7R1	Extended synaptotagmin-1 OS=Mus musculus OX=10090 GN=Esyt1 PE=1 SV=2	FALSE	TRUE	8.79121	8	9	8	6.47023e+06	20.73
High	Q8C0C7	Phenylalanine--tRNA ligase alpha subunit OS=Mus musculus OX=10090 GN=Farsa PE=1 SV=1	FALSE	TRUE	12.9921	7	8	7	4.10563e+07	17.21
High	Q9CQR2	40S ribosomal protein S21 OS=Mus musculus OX=10090 GN=Rps21 PE=1 SV=1	FALSE	TRUE	57.8313	4	7	4	7.50625e+07	17.8
High	P30415	NK-tumor recognition protein OS=Mus musculus OX=10090 GN=Nktr PE=1 SV=4	FALSE	TRUE	6.19408	6	8	6	1.95462e+07	20.38
High	P62071	Ras-related protein R-Ras2 OS=Mus musculus OX=10090 GN=Rras2 PE=1 SV=1	FALSE	TRUE	28.4314	5	6	3	1.74294e+07	16.89
High	Q9DBZ5	Eukaryotic translation initiation factor 3 subunit K OS=Mus musculus OX=10090 GN=Eif3k PE=1 SV=1	FALSE	TRUE	27.9817	5	7	5	7.07271e+07	20.92
High	Q3UDY1	Aldo_ket_red domain-containing protein OS=Mus musculus OX=10090 GN=Akr1b3 PE=1 SV=1	FALSE	TRUE	18.9873	6	6	6	6.9027e+07	14.76
High	Q8BRF7	Sec1 family domain-containing protein 1 OS=Mus musculus OX=10090 GN=Scfd1 PE=1 SV=1	FALSE	TRUE	13.928	6	6	6	9.45048e+06	14.99
High	P62774	Myotrophin OS=Mus musculus OX=10090 GN=Mtpn PE=1 SV=2	FALSE	TRUE	31.3559	4	6	4	1.22889e+08	19.91
High	F8WIV5	Dynamin-2 OS=Mus musculus OX=10090 GN=Dnm2 PE=1 SV=2	FALSE	TRUE	9.42529	9	9	5	9.70952e+06	16.85
High	Q6PE70	Integrin beta OS=Mus musculus OX=10090 GN=Itgb5 PE=1 SV=1	FALSE	TRUE	8.13517	6	6	6	2.5887e+07	12.65
High	Q9D945	Protein LLP homolog OS=Mus musculus OX=10090 GN=Llph PE=1 SV=1	FALSE	TRUE	29.2308	3	5	3	3.83518e+07	13.95
High	Q7TNL5	Serine/threonine-protein phosphatase 2A 56 kDa regulatory subunit OS=Mus musculus OX=10090 GN=Ppp2r5d PE=1 SV=1	FALSE	TRUE	16.8067	8	8	8	2.11529e+07	23.03
High	P0C0S6	Histone H2A.Z OS=Mus musculus OX=10090 GN=H2az1 PE=1 SV=2	FALSE	TRUE	31.25	4	47	2	6.77084e+08	78.17
High	Q8C0E2	Vacuolar protein sorting-associated protein 26B OS=Mus musculus OX=10090 GN=Vps26b PE=1 SV=1	FALSE	TRUE	22.3214	6	6	6	34630387	15.59
High	Q8R5H1	Ubiquitin carboxyl-terminal hydrolase 15 OS=Mus musculus OX=10090 GN=Usp15 PE=1 SV=1	FALSE	TRUE	7.03364	6	6	6	5.40503e+06	15.19
High	P62334	26S proteasome regulatory subunit 10B OS=Mus musculus OX=10090 GN=Psmc6 PE=1 SV=1	FALSE	TRUE	20.8226	7	8	7	3.31059e+07	21.18
High	Q3TN31	Proteasome subunit alpha type OS=Mus musculus OX=10090 GN=Psma7 PE=2 SV=1	FALSE	TRUE	24.1935	5	6	5	2.90279e+07	14.85
High	Q920A5	Retinoid-inducible serine carboxypeptidase OS=Mus musculus OX=10090 GN=Scpep1 PE=1 SV=2	FALSE	TRUE	15.9292	7	8	7	1.03474e+08	16.81
High	Q20BD0	Heterogeneous nuclear ribonucleoprotein A/B OS=Mus musculus OX=10090 GN=Hnrnpab PE=1 SV=1	FALSE	TRUE	25.3012	7	9	6	1.72928e+08	22.58
High	Q9CPQ3	Mitochondrial import receptor subunit TOM22 homolog OS=Mus musculus OX=10090 GN=Tomm22 PE=1 SV=3	FALSE	TRUE	66.1972	5	7	5	5.10672e+07	21.95
High	P50518	V-type proton ATPase subunit E 1 OS=Mus musculus OX=10090 GN=Atp6v1e1 PE=1 SV=2	FALSE	TRUE	24.3363	6	7	6	3.68891e+07	18.49
High	Q0PD56	Rab5B OS=Mus musculus OX=10090 GN=Rab5b PE=2 SV=1	FALSE	TRUE	31.441	6	9	3	17486046	21.7
High	B9EIU1	Glutamyl-prolyl-tRNA synthetase OS=Mus musculus OX=10090 GN=Eprs PE=2 SV=1	FALSE	TRUE	5.15873	7	7	7	1.14759e+07	15.19
High	Q91VA7	Isocitrate dehydrogenase [NAD] subunit, mitochondrial OS=Mus musculus OX=10090 GN=Idh3b PE=1 SV=1	FALSE	TRUE	17.9688	7	7	7	1.03835e+08	15.02
High	Q91XX1	Protocadherin gamma C3 OS=Mus musculus OX=10090 GN=Pcdhgc3 PE=1 SV=1	FALSE	TRUE	8.99358	7	8	7	4.15138e+07	18.67
High	Q8BVQ5	Protein phosphatase methylesterase 1 OS=Mus musculus OX=10090 GN=Ppme1 PE=1 SV=5	FALSE	TRUE	22.0207	7	7	7	2.19218e+07	19.29
High	P32507	Nectin-2 OS=Mus musculus OX=10090 GN=Nectin2 PE=1 SV=2	FALSE	TRUE	14.717	6	7	6	3.0462e+07	19.47
High	Q9D7B7	Probable glutathione peroxidase 8 OS=Mus musculus OX=10090 GN=Gpx8 PE=1 SV=1	FALSE	TRUE	25.3589	5	6	5	8.14406e+07	14.62
High	Q8CDZ5	Nucleoporin_C domain-containing protein OS=Mus musculus OX=10090 GN=Nup133 PE=2 SV=1	FALSE	TRUE	6.14719	6	6	6	1.18272e+07	14.62
High	Q9D997	N-acetyl-D-glucosamine kinase OS=Mus musculus OX=10090 GN=Nagk PE=1 SV=1	FALSE	TRUE	19.6676	6	6	6	2.30117e+07	13.94
High	Q66K07	Ubqln1 protein OS=Mus musculus OX=10090 GN=Ubqln1 PE=2 SV=1	FALSE	TRUE	10.3093	5	7	2	2.85803e+07	18.53
High	P26618	Platelet-derived growth factor receptor alpha OS=Mus musculus OX=10090 GN=Pdgfra PE=1 SV=3	FALSE	TRUE	7.7135	7	8	7	1.43667e+07	18.9
High	Q66JR7	Pgm2 protein (Fragment) OS=Mus musculus OX=10090 GN=Pgm1 PE=2 SV=1	FALSE	TRUE	13.5593	7	8	7	1.31417e+07	18.71
High	Q3TXJ7	Uncharacterized protein OS=Mus musculus OX=10090 GN=Bax PE=2 SV=1	FALSE	TRUE	30.7292	5	5	5	1.10006e+07	14.06
High	Q3TWW8	Serine/arginine-rich splicing factor 6 OS=Mus musculus OX=10090 GN=Srsf6 PE=1 SV=1	FALSE	TRUE	14.4543	5	6	4	4.82432e+07	14.92
High	Q8BTI8	Serine/arginine repetitive matrix protein 2 OS=Mus musculus OX=10090 GN=Srrm2 PE=1 SV=3	FALSE	TRUE	3.92157	7	9	7	4.02838e+07	20
High	E9QPI5	Sister chromatid cohesion protein PDS5 homolog A OS=Mus musculus OX=10090 GN=Pds5a PE=1 SV=1	FALSE	TRUE	6.00601	6	6	5	7.14585e+06	15.91
High	Q9D8L3	Signal sequence receptor, delta OS=Mus musculus OX=10090 GN=Ssr4 PE=1 SV=1	FALSE	TRUE	30.6358	4	6	4	7.63733e+07	17.14
High	Q01730	Ras suppressor protein 1 OS=Mus musculus OX=10090 GN=Rsu1 PE=1 SV=3	FALSE	TRUE	31.0469	8	11	8	6.12302e+07	25.38
High	Q60668	Heterogeneous nuclear ribonucleoprotein D0 OS=Mus musculus OX=10090 GN=Hnrnpd PE=1 SV=2	FALSE	TRUE	19.7183	6	7	4	7.92258e+07	17.44
High	B1AU75	Nuclear autoantigenic sperm protein OS=Mus musculus OX=10090 GN=Nasp PE=1 SV=1	FALSE	TRUE	6.72704	3	6	3	8.18006e+06	19.74
High	Q9EPL2	Calsyntenin-1 OS=Mus musculus OX=10090 GN=Clstn1 PE=1 SV=1	FALSE	TRUE	8.37589	8	8	8	2.07965e+07	14.16
High	P62843	40S ribosomal protein S15 OS=Mus musculus OX=10090 GN=Rps15 PE=1 SV=2	FALSE	TRUE	8.96552	2	8	2	8.68774e+08	26.3
High	P53702	Cytochrome c-type heme lyase OS=Mus musculus OX=10090 GN=Hccs PE=1 SV=2	FALSE	TRUE	18.3824	4	5	4	1.94005e+07	12.3
High	P62075	Mitochondrial import inner membrane translocase subunit Tim13 OS=Mus musculus OX=10090 GN=Timm13 PE=1 SV=1	FALSE	TRUE	53.6842	4	4	4	30204442	11.32
High	P15116	Cadherin-2 OS=Mus musculus OX=10090 GN=Cdh2 PE=1 SV=2	FALSE	TRUE	13.9073	8	10	8	5.26359e+07	20.12
High	Q9QZD9	Eukaryotic translation initiation factor 3 subunit I OS=Mus musculus OX=10090 GN=Eif3i PE=1 SV=1	FALSE	TRUE	23.3846	7	7	7	4.23181e+07	14.45
High	Q2KJF1	Alpha-1B-glycoprotein OS=Bos taurus GN=A1BG PE=1 SV=1	TRUE	FALSE	15.9046	6	6	6	1.95487e+07	15.87
High	Q9ES97	Reticulon-3 OS=Mus musculus OX=10090 GN=Rtn3 PE=1 SV=2	FALSE	TRUE	5.39419	2	4	2	9.35912e+07	13.41
High	P02787	Serotransferrin OS=Homo sapiens GN=TF PE=1 SV=3	TRUE	FALSE	7.87966	4	5	3	1.7525e+07	14.28
High	A0A2R8VHP3	Predicted pseudogene 5478 OS=Mus musculus OX=10090 GN=Gm5478 PE=1 SV=1	FALSE	TRUE	9.34579	7	22	1	87753216	51.97
High	Q6P5B5	Fragile X mental retardation syndrome-related protein 2 OS=Mus musculus OX=10090 GN=Fxr2 PE=1 SV=1	FALSE	TRUE	8.45697	5	6	2	1.41353e+07	12.4
High	Q8CAQ8	MICOS complex subunit Mic60 OS=Mus musculus OX=10090 GN=Immt PE=1 SV=1	FALSE	TRUE	9.90753	6	6	6	1.43968e+07	11.34
High	Q4FJL0	Rab10 OS=Mus musculus OX=10090 GN=Rab10 PE=1 SV=1	FALSE	TRUE	20.5	4	7	2	1.28835e+08	17.22
High	Q9D3P8	Plasminogen receptor (KT) OS=Mus musculus OX=10090 GN=Plgrkt PE=1 SV=1	FALSE	TRUE	36.0544	5	7	5	7.65518e+07	14.5
High	O35646	Calpain-6 OS=Mus musculus OX=10090 GN=Capn6 PE=1 SV=2	FALSE	TRUE	14.5086	8	8	8	2.1443e+08	19.1
High	Q6PDY2	2-aminoethanethiol dioxygenase OS=Mus musculus OX=10090 GN=Ado PE=1 SV=2	FALSE	TRUE	17.1875	3	4	3	2.1111e+07	10.56
High	A0A0R4J093	UMP-CMP kinase OS=Mus musculus OX=10090 GN=Cmpk1 PE=1 SV=1	FALSE	TRUE	30.3965	6	6	6	1.30528e+07	11.81
High	G3X972	Sec24-related gene family, member C (S. cerevisiae) OS=Mus musculus OX=10090 GN=Sec24c PE=1 SV=1	FALSE	TRUE	8.4854	7	7	7	1.06579e+07	15.63
High	Q3T052	Inter-alpha-trypsin inhibitor heavy chain H4 OS=Bos taurus GN=ITIH4 PE=1 SV=1	TRUE	FALSE	6.9869	6	6	6	4.40205e+07	13.96
High	Q543P7	Uncharacterized protein OS=Mus musculus OX=10090 GN=Arl3 PE=1 SV=1	FALSE	TRUE	37.3626	5	5	5	3.20759e+07	13.1
High	P53690	Matrix metalloproteinase-14 OS=Mus musculus OX=10090 GN=Mmp14 PE=2 SV=3	FALSE	TRUE	12.543	8	9	8	1.02297e+08	16.62
High	P35980	60S ribosomal protein L18 OS=Mus musculus OX=10090 GN=Rpl18 PE=1 SV=3	FALSE	TRUE	31.383	5	5	5	1.84188e+08	13.47
High	O08547	Vesicle-trafficking protein SEC22b OS=Mus musculus OX=10090 GN=Sec22b PE=1 SV=3	FALSE	TRUE	23.7209	4	5	4	3.99311e+07	12.52
High	A2BE28	Ribosomal biogenesis protein LAS1L OS=Mus musculus OX=10090 GN=Las1l PE=1 SV=1	FALSE	TRUE	8.37629	5	5	5	7.63715e+06	13.18
High	Q9D832	DnaJ homolog subfamily B member 4 OS=Mus musculus OX=10090 GN=Dnajb4 PE=1 SV=1	FALSE	TRUE	16.3205	5	5	4	19042632	13.16
High	P08228	Superoxide dismutase [Cu-Zn] OS=Mus musculus OX=10090 GN=Sod1 PE=1 SV=2	FALSE	TRUE	25.3247	3	4	3	3.71122e+07	12.29
High	Q8BYA0	Tubulin-specific chaperone D OS=Mus musculus OX=10090 GN=Tbcd PE=1 SV=1	FALSE	TRUE	4.93311	5	5	5	1.27718e+07	14.65
High	Q69ZZ6	Transmembrane and coiled-coil domains protein 1 OS=Mus musculus OX=10090 GN=Tmcc1 PE=1 SV=2	FALSE	TRUE	11.2481	6	7	6	5.71027e+07	16.49
High	A0A286YDV7	Nucleolar and coiled-body phosphoprotein 1 (Fragment) OS=Mus musculus OX=10090 GN=Nolc1 PE=1 SV=1	FALSE	TRUE	11.9658	8	9	8	8.50111e+07	20.62
High	Q3THE2	Myosin regulatory light chain 12B OS=Mus musculus OX=10090 GN=Myl12b PE=1 SV=2	FALSE	TRUE	33.7209	5	9	5	2.98545e+08	22.58
High	P61028	Ras-related protein Rab-8B OS=Mus musculus OX=10090 GN=Rab8b PE=1 SV=1	FALSE	TRUE	20.2899	4	8	1	2.67998e+07	19.27
High	Q61249	Immunoglobulin-binding protein 1 OS=Mus musculus OX=10090 GN=Igbp1 PE=1 SV=1	FALSE	TRUE	15.5882	4	4	4	1.79699e+07	12.45
High	Q3TN34	MICAL-like protein 2 OS=Mus musculus OX=10090 GN=Micall2 PE=1 SV=1	FALSE	TRUE	13.4787	9	9	9	3.93606e+07	22.62
High	Q9EST5	Acidic leucine-rich nuclear phosphoprotein 32 family member B OS=Mus musculus OX=10090 GN=Anp32b PE=1 SV=1	FALSE	TRUE	20.5882	6	7	3	7.15416e+07	13.1
High	Q8R5K4	Nucleolar protein 6 OS=Mus musculus OX=10090 GN=Nol6 PE=2 SV=2	FALSE	TRUE	9.02778	7	7	7	9.20835e+06	15.02
High	O88428	Bifunctional 3'-phosphoadenosine 5'-phosphosulfate synthase 2 OS=Mus musculus OX=10090 GN=Papss2 PE=1 SV=2	FALSE	TRUE	12.0773	6	6	5	6.74121e+06	12.21
High	P70290	55 kDa erythrocyte membrane protein OS=Mus musculus OX=10090 GN=Mpp1 PE=1 SV=1	FALSE	TRUE	14.3777	5	6	5	2.5072e+07	16.45
High	Q8JZU2	Tricarboxylate transport protein, mitochondrial OS=Mus musculus OX=10090 GN=Slc25a1 PE=1 SV=1	FALSE	TRUE	20.2572	6	6	6	6.48883e+07	12.55
High	D6Q0F5	Cytoplasmic dynein intermediate chain 2 isoform 2.1 OS=Mus musculus OX=10090 GN=Dync1i2 PE=2 SV=1	FALSE	TRUE	9.77099	5	5	5	5.0055e+07	14.49
High	Q91WS0	CDGSH iron-sulfur domain-containing protein 1 OS=Mus musculus OX=10090 GN=Cisd1 PE=1 SV=1	FALSE	TRUE	34.2593	3	4	3	3.17706e+07	10.94
High	E9PWQ3	Collagen, type VI, alpha 3 OS=Mus musculus OX=10090 GN=Col6a3 PE=1 SV=2	FALSE	TRUE	2.04019	6	6	6	3.34969e+06	16.25
High	F8WID5	Tropomyosin alpha-1 chain OS=Mus musculus OX=10090 GN=Tpm1 PE=1 SV=1	FALSE	TRUE	14.4172	5	5	1		15.86
High	A2AE89	Glutathione S-transferase Mu 1 OS=Mus musculus OX=10090 GN=Gstm1 PE=1 SV=2	FALSE	TRUE	26.6393	6	6	3	5.37593e+07	14.88
High	Q1MWP9	EH-domain containing 4 (Fragment) OS=Mus musculus OX=10090 GN=Ehd4 PE=2 SV=1	FALSE	TRUE	10.8456	5	5	4	7.63619e+06	13.06
High	Q5SF07	Insulin-like growth factor 2 mRNA-binding protein 2 OS=Mus musculus OX=10090 GN=Igf2bp2 PE=1 SV=1	FALSE	TRUE	12.1622	6	7	4	7.53419e+06	15.37
High	Q80T69	Lysine-specific demethylase 9 OS=Mus musculus OX=10090 GN=Rsbn1 PE=1 SV=3	FALSE	TRUE	6.54088	4	4	4	1.98991e+07	11.61
High	Q9D3L3	Synaptosomal-associated protein OS=Mus musculus OX=10090 GN=Snap23 PE=1 SV=1	FALSE	TRUE	30.7692	5	5	5	1.85451e+07	13.52
High	P02662	Alpha-S1-casein OS=Bos taurus GN=CSN1S1 PE=1 SV=2	TRUE	FALSE	22.4299	5	6	5	3.42236e+07	14.72
High	Q99KC8	von Willebrand factor A domain-containing protein 5A OS=Mus musculus OX=10090 GN=Vwa5a PE=1 SV=2	FALSE	TRUE	10.971	8	8	8	1.92118e+07	13.76
High	Q9JHS4	ATP-dependent Clp protease ATP-binding subunit clpX-like, mitochondrial OS=Mus musculus OX=10090 GN=Clpx PE=1 SV=2	FALSE	TRUE	9.14826	5	5	5	3.65141e+06	10.4
High	Q08288	Cell growth-regulating nucleolar protein OS=Mus musculus OX=10090 GN=Lyar PE=1 SV=2	FALSE	TRUE	14.6907	4	5	4	4.78325e+07	17.37
High	A0A571BEI2	AP2-associated protein kinase 1 (Fragment) OS=Mus musculus OX=10090 GN=Aak1 PE=1 SV=1	FALSE	TRUE	12.3529	4	4	4	6.3628e+06	12.69
High	Q3TIH9	UBIQUITIN_CONJUGAT_2 domain-containing protein OS=Mus musculus OX=10090 GN=Ube2l3 PE=2 SV=1	FALSE	TRUE	31.1688	4	5	3	3.45692e+07	12.96
High	Q3UA54	Uncharacterized protein (Fragment) OS=Mus musculus OX=10090 GN=Ptma PE=2 SV=1	FALSE	TRUE	13.9535	3	4	3	6.65821e+07	11.17
High	Q9QYS9	Protein quaking OS=Mus musculus OX=10090 GN=Qki PE=1 SV=1	FALSE	TRUE	14.3695	5	7	5	4.53262e+07	14.7
High	Q9JLB9	Nectin-3 OS=Mus musculus OX=10090 GN=Nectin3 PE=1 SV=1	FALSE	TRUE	10.7468	4	6	4	1.8512e+07	18.38
High	Q6P9R2	Serine/threonine-protein kinase OSR1 OS=Mus musculus OX=10090 GN=Oxsr1 PE=1 SV=1	FALSE	TRUE	13.093	6	6	4	1.23698e+07	14.3
High	J3QN85	Fibroblast growth factor receptor OS=Mus musculus OX=10090 GN=Fgfr1 PE=1 SV=1	FALSE	TRUE	7.20288	6	9	4	2.29009e+07	19.95
High	H3BJX8	Rho guanine nucleotide exchange factor 2 OS=Mus musculus OX=10090 GN=Arhgef2 PE=1 SV=2	FALSE	TRUE	5.40997	6	6	6	3.20113e+07	15.96
High	Q9R1T2	SUMO-activating enzyme subunit 1 OS=Mus musculus OX=10090 GN=Sae1 PE=1 SV=1	FALSE	TRUE	18	7	8	7	5.91185e+07	17.19
High	O88811	Signal transducing adapter molecule 2 OS=Mus musculus OX=10090 GN=Stam2 PE=1 SV=1	FALSE	TRUE	9.94264	5	5	5	1.54093e+07	9.87
High	P28867	Protein kinase C delta type OS=Mus musculus OX=10090 GN=Prkcd PE=1 SV=3	FALSE	TRUE	5.48961	4	7	3	1.58853e+07	14
High	Q9WUM3	Coronin-1B OS=Mus musculus OX=10090 GN=Coro1b PE=1 SV=1	FALSE	TRUE	12.8099	5	5	5	4.98756e+07	13.17
High	O89112	Glutathione S-transferase LANCL1 OS=Mus musculus OX=10090 GN=Lancl1 PE=1 SV=1	FALSE	TRUE	11.0276	4	5	4	2.292e+07	12.68
High	P55194	SH3 domain-binding protein 1 OS=Mus musculus OX=10090 GN=Sh3bp1 PE=1 SV=3	FALSE	TRUE	9.26471	5	5	5	1.10383e+07	12.42
High	Q9CQW9	Interferon-induced transmembrane protein 3 OS=Mus musculus OX=10090 GN=Ifitm3 PE=1 SV=1	FALSE	TRUE	26.2774	2	3	2	5.02855e+07	12.49
High	P30285	Cyclin-dependent kinase 4 OS=Mus musculus OX=10090 GN=Cdk4 PE=1 SV=1	FALSE	TRUE	13.8614	4	8	2	4.03713e+07	19.02
High	N0E463	Casein kinase II subunit beta OS=Mus musculus OX=10090 GN=Csnk2b-Ly6g5b PE=2 SV=1	FALSE	TRUE	24.2291	5	5	5	6.24828e+07	11.76
High	Q08024	Core-binding factor subunit beta OS=Mus musculus OX=10090 GN=Cbfb PE=1 SV=1	FALSE	TRUE	24.5989	4	4	4	1.48943e+07	12.18
High	P32233	Developmentally-regulated GTP-binding protein 1 OS=Mus musculus OX=10090 GN=Drg1 PE=1 SV=1	FALSE	TRUE	21.5259	7	7	6	1.29683e+07	19.07
High	Q3UK27	NEDD8-activating enzyme E1 regulatory subunit OS=Mus musculus OX=10090 GN=Nae1 PE=1 SV=1	FALSE	TRUE	12.3596	5	5	5	1.23771e+07	14.11
High	E9QP62	LIM and senescent cell antigen-like-containing domain protein OS=Mus musculus OX=10090 GN=Lims1 PE=1 SV=1	FALSE	TRUE	11.8863	4	5	4	3.25927e+07	11.78
High	Q9CPQ1	Cytochrome c oxidase subunit 6C OS=Mus musculus OX=10090 GN=Cox6c PE=1 SV=3	FALSE	TRUE	61.8421	6	10	6	1.05229e+08	19.14
High	Q9QZ88	Vacuolar protein sorting-associated protein 29 OS=Mus musculus OX=10090 GN=Vps29 PE=1 SV=1	FALSE	TRUE	24.7253	4	7	4	1.13374e+08	14.48
High	Q28107	Coagulation factor V OS=Bos taurus GN=F5 PE=1 SV=1	TRUE	FALSE	2.03528	4	5	4	3.88743e+07	12.03
High	Q8C845	EF-hand domain-containing protein D2 OS=Mus musculus OX=10090 GN=Efhd2 PE=1 SV=1	FALSE	TRUE	21.25	5	5	5	1.77109e+07	9.64
High	Q571G8	MKIAA1649 protein (Fragment) OS=Mus musculus OX=10090 GN=Poldip3 PE=2 SV=1	FALSE	TRUE	12.1413	5	6	5	27662141	14.77
High	Q3U8M3	Uncharacterized protein OS=Mus musculus OX=10090 GN=Rpl37a PE=2 SV=1	FALSE	TRUE	39.1753	3	5	3	9.16567e+07	12.87
High	Q9CPX6	Ubiquitin-like-conjugating enzyme ATG3 OS=Mus musculus OX=10090 GN=Atg3 PE=1 SV=1	FALSE	TRUE	18.4713	5	5	5	1.83226e+07	13.08
High	Q9D1D4	Transmembrane emp24 domain-containing protein 10 OS=Mus musculus OX=10090 GN=Tmed10 PE=1 SV=1	FALSE	TRUE	14.6119	3	4	3	8.35116e+07	9.75
High	O54988	STE20-like serine/threonine-protein kinase OS=Mus musculus OX=10090 GN=Slk PE=1 SV=2	FALSE	TRUE	6.56934	6	6	6	1.83858e+07	18.14
High	Q14BZ3	Latexin OS=Mus musculus OX=10090 GN=Lxn PE=1 SV=1	FALSE	TRUE	22.973	4	8	4	2.26349e+08	21.02
High	Q4FZH2	Ribosomal protein L26 OS=Mus musculus OX=10090 GN=Rpl26 PE=1 SV=1	FALSE	TRUE	29.6552	7	8	7	330302843	18.07
High	Q8C5H8	NAD kinase 2, mitochondrial OS=Mus musculus OX=10090 GN=Nadk2 PE=1 SV=2	FALSE	TRUE	13.9381	5	5	5	2.18967e+07	12.7
High	Q9DCX2	ATP synthase subunit d, mitochondrial OS=Mus musculus OX=10090 GN=Atp5pd PE=1 SV=3	FALSE	TRUE	40.9938	5	5	5	7.98674e+07	13.66
High	Q3U3T6	Protein kinase domain-containing protein OS=Mus musculus OX=10090 GN=Stk24 PE=2 SV=1	FALSE	TRUE	14.6172	6	6	6	3.40709e+07	13.45
High	P28653	Biglycan OS=Mus musculus OX=10090 GN=Bgn PE=1 SV=1	FALSE	TRUE	21.4092	6	7	6	3.16183e+07	16.96
High	Q9JJI8	60S ribosomal protein L38 OS=Mus musculus OX=10090 GN=Rpl38 PE=1 SV=3	FALSE	TRUE	32.8571	3	9	3	5.80488e+07	24.57
High	P54276	DNA mismatch repair protein Msh6 OS=Mus musculus OX=10090 GN=Msh6 PE=1 SV=3	FALSE	TRUE	5.6701	6	6	6	1.0296e+07	16.2
High	D3Z7M5	Nucleolar protein 16 OS=Mus musculus OX=10090 GN=Nop16 PE=1 SV=1	FALSE	TRUE	29.8343	4	5	4	2.90976e+07	13.45
High	A0A0A6YY83	Protocadherin 7 OS=Mus musculus OX=10090 GN=Pcdh7 PE=1 SV=1	FALSE	TRUE	5.41833	5	5	5	1.60215e+07	11.98
High	A8ASF5	Acyltransferase OS=Mus musculus OX=10090 GN=Cpt1a PE=2 SV=1	FALSE	TRUE	8.15006	5	5	5	1.38893e+07	9.65
High	Q8BTF0	Coatomer subunit alpha OS=Mus musculus OX=10090 GN=Copa PE=2 SV=1	FALSE	TRUE	5.55556	6	6	6	1.26694e+07	15.03
High	Q9ERH4	Nucleolar and spindle-associated protein 1 OS=Mus musculus OX=10090 GN=Nusap1 PE=1 SV=1	FALSE	TRUE	18.7354	7	7	7	1.88228e+07	15.24
High	Q3U2W5	Galectin (Fragment) OS=Mus musculus OX=10090 GN=Lgals8 PE=2 SV=1	FALSE	TRUE	22.4924	7	7	7	3.90019e+07	13.43
High	Q3TCH7	Cullin-4A OS=Mus musculus OX=10090 GN=Cul4a PE=1 SV=1	FALSE	TRUE	9.61792	7	7	4	2.59705e+07	16.84
High	A0A494B945	Ras-related protein Rab-1B (Fragment) OS=Mus musculus OX=10090 GN=Rab1b PE=1 SV=1	FALSE	TRUE	30.315	7	11	2	6.17159e+07	27.72
High	ENSEMBL:ENSBTAP00000018229	(Bos taurus) 54 kDa protein [OS=Bos taurus]	TRUE	FALSE	13.0526	6	6	1	3.72589e+07	13.66
High	Q8C878	NEDD8-activating enzyme E1 catalytic subunit OS=Mus musculus OX=10090 GN=Uba3 PE=1 SV=2	FALSE	TRUE	12.3377	5	5	5	3.32653e+07	13.61
High	P70670	Nascent polypeptide-associated complex subunit alpha, muscle-specific form OS=Mus musculus OX=10090 GN=Naca PE=1 SV=2	FALSE	TRUE	1.92044	3	3	3	8.13767e+07	11.08
High	Q61730	Interleukin-1 receptor accessory protein OS=Mus musculus OX=10090 GN=Il1rap PE=1 SV=1	FALSE	TRUE	12.1053	6	6	6	1.14361e+07	14.36
High	Q8R1Q8	Cytoplasmic dynein 1 light intermediate chain 1 OS=Mus musculus OX=10090 GN=Dync1li1 PE=1 SV=1	FALSE	TRUE	15.6788	7	7	7	3.82097e+07	18.2
High	P00493	Hypoxanthine-guanine phosphoribosyltransferase OS=Mus musculus OX=10090 GN=Hprt1 PE=1 SV=3	FALSE	TRUE	32.1101	6	6	6	2.11469e+07	14.02
High	Q8BIF0	CD99 antigen-like protein 2 OS=Mus musculus OX=10090 GN=Cd99l2 PE=1 SV=1	FALSE	TRUE	26.1603	4	5	4	3.45365e+07	15.82
High	Q9Z315	U4/U6.U5 tri-snRNP-associated protein 1 OS=Mus musculus OX=10090 GN=Sart1 PE=1 SV=1	FALSE	TRUE	10.5459	7	7	6	1.07428e+07	14.5
High	P08030	Adenine phosphoribosyltransferase OS=Mus musculus OX=10090 GN=Aprt PE=1 SV=2	FALSE	TRUE	36.6667	6	7	6	2.18631e+08	14
High	Q61074	Protein phosphatase 1G OS=Mus musculus OX=10090 GN=Ppm1g PE=1 SV=3	FALSE	TRUE	15.4982	6	6	6	3.75613e+07	14.03
High	Q9QXT0	Protein canopy homolog 2 OS=Mus musculus OX=10090 GN=Cnpy2 PE=1 SV=1	FALSE	TRUE	27.4725	4	5	4	1.28028e+07	14.75
High	G3X8Y3	N-alpha-acetyltransferase 15, NatA auxiliary subunit OS=Mus musculus OX=10090 GN=Naa15 PE=1 SV=1	FALSE	TRUE	6.93642	6	6	6	16866690	9.84
High	Q8C854	Myelin expression factor 2 OS=Mus musculus OX=10090 GN=Myef2 PE=1 SV=1	FALSE	TRUE	10.9983	5	5	5	1.93271e+07	12.48
High	Q6ZWN5	40S ribosomal protein S9 OS=Mus musculus OX=10090 GN=Rps9 PE=1 SV=3	FALSE	TRUE	26.2887	7	8	7	4.41371e+07	18.25
High	P62911	60S ribosomal protein L32 OS=Mus musculus OX=10090 GN=Rpl32 PE=1 SV=2	FALSE	TRUE	27.4074	3	4	3	1.04153e+08	11.96
High	Q3USR5	Uncharacterized protein OS=Mus musculus OX=10090 GN=Fbxo2 PE=1 SV=1	FALSE	TRUE	16.4983	4	6	4	5.95922e+07	14.66
High	Q9QYF1	Retinol dehydrogenase 11 OS=Mus musculus OX=10090 GN=Rdh11 PE=1 SV=2	FALSE	TRUE	15.1899	4	4	4	1.77644e+07	6.49
High	Q3TKM9	Actin-related protein 2/3 complex subunit 5 OS=Mus musculus OX=10090 GN=Arpc5 PE=2 SV=1	FALSE	TRUE	29.1391	3	4	1	3.74527e+07	12.02
High	Q80X85	28S ribosomal protein S7, mitochondrial OS=Mus musculus OX=10090 GN=Mrps7 PE=1 SV=1	FALSE	TRUE	24.7934	4	5	4	2.23443e+07	17.5
High	G5E829	Plasma membrane calcium-transporting ATPase 1 OS=Mus musculus OX=10090 GN=Atp2b1 PE=1 SV=1	FALSE	TRUE	5.7377	5	5	5	1.51414e+07	12.26
High	Q6DYE8	Ectonucleotide pyrophosphatase/phosphodiesterase family member 3 OS=Mus musculus OX=10090 GN=Enpp3 PE=1 SV=2	FALSE	TRUE	8.92449	7	7	7	2.89934e+07	11.95
High	E9Q9H0	Disks large homolog 1 OS=Mus musculus OX=10090 GN=Dlg1 PE=1 SV=1	FALSE	TRUE	5.48246	5	5	5	2.51762e+07	11.43
High	Q3TLH4	Protein PRRC2C OS=Mus musculus OX=10090 GN=Prrc2c PE=1 SV=3	FALSE	TRUE	3.47857	9	9	9	3.32321e+07	22.04
High	Q6IRU2	Tropomyosin alpha-4 chain OS=Mus musculus OX=10090 GN=Tpm4 PE=1 SV=3	FALSE	TRUE	20.1613	6	6	6	27251352	15.18
High	Q28065	C4b-binding protein alpha chain OS=Bos taurus GN=C4BPA PE=2 SV=1	TRUE	FALSE	7.86885	4	6	4	5.26265e+07	16.47
High	P61082	NEDD8-conjugating enzyme Ubc12 OS=Mus musculus OX=10090 GN=Ube2m PE=1 SV=1	FALSE	TRUE	32.7869	6	7	6	5.95058e+07	10.42
High	P20444	Protein kinase C alpha type OS=Mus musculus OX=10090 GN=Prkca PE=1 SV=3	FALSE	TRUE	6.99405	4	5	3	7.80372e+06	9.33
High	Q62511	E3 ubiquitin-protein ligase ZFP91 OS=Mus musculus OX=10090 GN=Zfp91 PE=1 SV=3	FALSE	TRUE	9.79021	4	6	4	5.57687e+07	17.36
High	Q8R2Y2	Cell surface glycoprotein MUC18 OS=Mus musculus OX=10090 GN=Mcam PE=1 SV=1	FALSE	TRUE	10.8025	6	6	6	1.33596e+07	14.77
High	Q62426	Cystatin-B OS=Mus musculus OX=10090 GN=Cstb PE=1 SV=1	FALSE	TRUE	57.1429	3	4	3	6.37224e+07	11.63
High	P35951	Low-density lipoprotein receptor OS=Mus musculus OX=10090 GN=Ldlr PE=1 SV=2	FALSE	TRUE	8.81671	6	7	6	3.28911e+07	14.56
High	O08604	Retinoic acid early-inducible protein 1-gamma OS=Mus musculus OX=10090 GN=Raet1c PE=1 SV=1	FALSE	TRUE	18.9723	5	6	4	4.40972e+07	12.31
High	Q7TNP6	Cars protein (Fragment) OS=Mus musculus OX=10090 GN=Cars PE=2 SV=1	FALSE	TRUE	20.1365	5	5	1	25360938	13.54
High	Q60960	Importin subunit alpha-5 OS=Mus musculus OX=10090 GN=Kpna1 PE=1 SV=2	FALSE	TRUE	14.8699	7	7	3	1.05208e+07	14.19
High	P48024	Eukaryotic translation initiation factor 1 OS=Mus musculus OX=10090 GN=Eif1 PE=1 SV=2	FALSE	TRUE	30.0885	2	5	2	1.1034e+07	15.75
High	O70251	Elongation factor 1-beta OS=Mus musculus OX=10090 GN=Eef1b PE=1 SV=5	FALSE	TRUE	20	3	3	2	5.28033e+07	10.59
High	Q3MHN5	Vitamin D-binding protein OS=Bos taurus GN=GC PE=2 SV=1	TRUE	FALSE	13.0802	6	6	1		13.87
High	Q8CH25	SAFB-like transcription modulator OS=Mus musculus OX=10090 GN=Sltm PE=1 SV=1	FALSE	TRUE	6.40155	5	5	5	1.59488e+07	14.1
High	Q9Z2I0	Mitochondrial proton/calcium exchanger protein OS=Mus musculus OX=10090 GN=Letm1 PE=1 SV=1	FALSE	TRUE	11.1111	7	7	7	1.61045e+07	10.51
High	Q9EPC1	Alpha-parvin OS=Mus musculus OX=10090 GN=Parva PE=1 SV=1	FALSE	TRUE	15.3226	5	5	5	5.34729e+07	14.69
High	Q5M9J8	Ribosomal protein L28 OS=Mus musculus OX=10090 GN=Rpl28 PE=1 SV=1	FALSE	TRUE	29.927	4	4	4	5.76404e+07	11.12
High	Q3THA0	Eukaryotic translation initiation factor 3 subunit G OS=Mus musculus OX=10090 GN=Eif3g PE=2 SV=1	FALSE	TRUE	13.4375	4	4	4	40139090	11.19
High	Q3TJZ6	Protein FAM98A OS=Mus musculus OX=10090 GN=Fam98a PE=1 SV=1	FALSE	TRUE	11.4563	4	5	3	9.73678e+06	17.4
High	P61358	60S ribosomal protein L27 OS=Mus musculus OX=10090 GN=Rpl27 PE=1 SV=2	FALSE	TRUE	42.6471	5	7	5	4.11542e+08	16.03
High	Q3USC0	Uncharacterized protein OS=Mus musculus OX=10090 GN=Heatr3 PE=2 SV=1	FALSE	TRUE	8.9838	5	6	5	1.55199e+07	15.41
High	G3X9T7	Galectin-9 OS=Mus musculus OX=10090 GN=Lgals9 PE=1 SV=1	FALSE	TRUE	15.2975	5	5	5	6.73243e+07	12.36
High	Q80X68	Citrate synthase OS=Mus musculus OX=10090 GN=Csl PE=1 SV=1	FALSE	TRUE	10.3004	4	6	1		15.61
High	P35762	CD81 antigen OS=Mus musculus OX=10090 GN=Cd81 PE=1 SV=2	FALSE	TRUE	17.7966	2	4	2	2.44011e+07	15.2
High	Q9CZ52	Anthrax toxin receptor 1 OS=Mus musculus OX=10090 GN=Antxr1 PE=1 SV=2	FALSE	TRUE	4.80427	2	5	2	1.83323e+07	17.34
High	P54775	26S proteasome regulatory subunit 6B OS=Mus musculus OX=10090 GN=Psmc4 PE=1 SV=2	FALSE	TRUE	16.9856	7	7	7	5.88127e+07	17.14
High	Q9CXT8	Mitochondrial-processing peptidase subunit beta OS=Mus musculus OX=10090 GN=Pmpcb PE=1 SV=1	FALSE	TRUE	16.1554	6	6	5	3.12044e+07	17.03
High	Q3UW40	TRASH domain-containing protein OS=Mus musculus OX=10090 GN=Rpl24 PE=2 SV=1	FALSE	TRUE	30	5	5	5	8.1823e+07	12.2
High	Q99JF8	PC4 and SFRS1-interacting protein OS=Mus musculus OX=10090 GN=Psip1 PE=1 SV=1	FALSE	TRUE	8.90152	4	5	4	2.34649e+07	9.97
High	D3YTQ3	Heterogeneous nuclear ribonucleoprotein D-like OS=Mus musculus OX=10090 GN=Hnrnpdl PE=1 SV=1	FALSE	TRUE	13.5714	5	6	3	1.51188e+07	15.43
High	B2RRI1	Adam17 protein OS=Mus musculus OX=10090 GN=Adam17 PE=2 SV=1	FALSE	TRUE	5.92503	5	5	5	1.15955e+07	11.25
High	Q69ZD1	MKIAA1699 protein (Fragment) OS=Mus musculus OX=10090 GN=Exoc4 PE=2 SV=1	FALSE	TRUE	7.26714	5	5	5	7.11363e+06	14.04
High	E9PWG6	Non-SMC condensin I complex, subunit G OS=Mus musculus OX=10090 GN=Ncapg PE=1 SV=1	FALSE	TRUE	6.67331	6	6	6	1.2109e+07	9.95
High	Q9D6K8	FUN14 domain-containing protein 2 OS=Mus musculus OX=10090 GN=Fundc2 PE=1 SV=1	FALSE	TRUE	35.0993	6	6	6	4.39429e+07	14.67
High	P35821	Tyrosine-protein phosphatase non-receptor type 1 OS=Mus musculus OX=10090 GN=Ptpn1 PE=1 SV=2	FALSE	TRUE	17.8241	5	7	5	1.2976e+07	17.82
High	Q3UDM0	MOB kinase activator 1B OS=Mus musculus OX=10090 GN=Mob1b PE=1 SV=1	FALSE	TRUE	22.1719	5	6	5	7.41669e+07	13.32
High	E9PXY8	Ubiquitin carboxyl-terminal hydrolase 7 OS=Mus musculus OX=10090 GN=Usp7 PE=1 SV=1	FALSE	TRUE	4.72441	6	6	6	4.07905e+07	13.14
High	P26369	Splicing factor U2AF 65 kDa subunit OS=Mus musculus OX=10090 GN=U2af2 PE=1 SV=3	FALSE	TRUE	12.6316	6	6	6	7.82026e+07	9.86
High	Q5M9K2	Vesicle-associated membrane protein 5 OS=Mus musculus OX=10090 GN=Vamp5 PE=2 SV=1	FALSE	TRUE	38.2353	3	4	3	3.57774e+07	11.02
High	A0A1L1SSF2	ADP-dependent glucokinase OS=Mus musculus OX=10090 GN=Adpgk PE=1 SV=1	FALSE	TRUE	12.2984	4	4	4	1.42513e+07	11.44
High	Q9CYD3	Cartilage-associated protein OS=Mus musculus OX=10090 GN=Crtap PE=1 SV=3	FALSE	TRUE	17.25	6	7	6	2.27473e+07	14.59
High	Q6PDG5	SWI/SNF complex subunit SMARCC2 OS=Mus musculus OX=10090 GN=Smarcc2 PE=1 SV=2	FALSE	TRUE	4.45177	4	4	1	1.58625e+06	9.76
High	A0A5H1ZRL3	Negative elongation factor B OS=Mus musculus OX=10090 GN=Nelfb PE=4 SV=1	FALSE	TRUE	7.60697	4	4	4	5.35706e+06	8.3
High	Q9CWK0	Ribosomal_L14e domain-containing protein OS=Mus musculus OX=10090 GN=Rpl14 PE=2 SV=1	FALSE	TRUE	20.7048	4	5	4	1.86161e+07	12.03
High	Q9CX56	26S proteasome non-ATPase regulatory subunit 8 OS=Mus musculus OX=10090 GN=Psmd8 PE=1 SV=2	FALSE	TRUE	20.1133	8	8	8	1.70882e+08	9.43
High	O70492	Sorting nexin-3 OS=Mus musculus OX=10090 GN=Snx3 PE=1 SV=3	FALSE	TRUE	38.2716	6	6	6	7.75251e+07	12.19
High	Q3TCR9	Uncharacterized protein OS=Mus musculus OX=10090 GN=Zyx PE=2 SV=1	FALSE	TRUE	11.5248	5	5	5	2.46489e+07	15.15
High	Q8VCF0	Mitochondrial antiviral-signaling protein OS=Mus musculus OX=10090 GN=Mavs PE=1 SV=1	FALSE	TRUE	8.94632	3	3	3	1.20306e+07	9.77
High	A0A140LHG8	Signal peptidase complex subunit 2 OS=Mus musculus OX=10090 GN=Spcs2 PE=1 SV=1	FALSE	TRUE	21.9231	4	6	4	2.74787e+07	17.85
High	P97350	Plakophilin-1 OS=Mus musculus OX=10090 GN=Pkp1 PE=1 SV=1	FALSE	TRUE	7.14286	4	5	4	2.90141e+07	8.77
High	Q8BU14	Translocation protein SEC62 OS=Mus musculus OX=10090 GN=Sec62 PE=1 SV=1	FALSE	TRUE	9.54774	4	5	4	6.72509e+07	12.9
High	Q8BP60	Uncharacterized protein OS=Mus musculus OX=10090 GN=Nxf1 PE=2 SV=1	FALSE	TRUE	9.87055	5	6	5	1.63826e+07	14.32
High	E9PZD8	Ceruloplasmin OS=Mus musculus OX=10090 GN=Cp PE=1 SV=1	FALSE	TRUE	6.44567	5	6	4	7.02227e+06	14.06
High	Q9D7S7	60S ribosomal protein L22-like 1 OS=Mus musculus OX=10090 GN=Rpl22l1 PE=1 SV=1	FALSE	TRUE	19.6721	2	4	2	3.45979e+07	8.21
High	A0A1S6GWI9	Uncharacterized protein OS=Mus musculus OX=10090 GN=Lrpap1 PE=2 SV=1	FALSE	TRUE	14.5503	5	6	5	2.2726e+07	12.77
High	Q8CGA0	Protein phosphatase 1F OS=Mus musculus OX=10090 GN=Ppm1f PE=1 SV=1	FALSE	TRUE	9.51327	4	4	4	1.41196e+07	7.54
High	Q921J3	Dnajc5 protein OS=Mus musculus OX=10090 GN=Dnajc5 PE=2 SV=1	FALSE	TRUE	14.2157	2	3	2	2.99465e+07	10.2
High	G3XA48	Isopentenyl-diphosphate Delta-isomerase 1 OS=Mus musculus OX=10090 GN=Idi1 PE=1 SV=1	FALSE	TRUE	15.1943	5	6	5	7.18223e+07	12.24
High	Q3U281	Uncharacterized protein OS=Mus musculus OX=10090 GN=Sar1b PE=2 SV=1	FALSE	TRUE	21.2121	4	5	2	61878028	11.91
High	A7E215	Rps6ka3 protein (Fragment) OS=Mus musculus OX=10090 GN=Rps6ka3 PE=2 SV=1	FALSE	TRUE	7.28745	5	5	5	2.85892e+07	8.67
High	S4R1M2	Scaffold attachment factor B1 OS=Mus musculus OX=10090 GN=Safb PE=1 SV=1	FALSE	TRUE	7.77423	5	6	5	7.57972e+06	18.28
High	Q3TIK1	GRASP55_65 domain-containing protein OS=Mus musculus OX=10090 GN=Gorasp2 PE=2 SV=1	FALSE	TRUE	13.082	5	5	5	4.43878e+07	10.34
High	Q6P8X1	Sorting nexin-6 OS=Mus musculus OX=10090 GN=Snx6 PE=1 SV=2	FALSE	TRUE	16.7488	7	8	7	3.66953e+07	14.59
High	Q3UZG4	Aminoacyl tRNA synthase complex-interacting multifunctional protein 1 OS=Mus musculus OX=10090 GN=Aimp1 PE=1 SV=1	FALSE	TRUE	22.2571	5	5	5	1.30897e+07	13.37
High	Q9ER63	Tumor necrosis factor receptor superfamily member 23 OS=Mus musculus OX=10090 GN=Tnfrsf23 PE=2 SV=2	FALSE	TRUE	18.75	3	6	3	1.59362e+08	13.99
High	P62315	Small nuclear ribonucleoprotein Sm D1 OS=Mus musculus OX=10090 GN=Snrpd1 PE=1 SV=1	FALSE	TRUE	20.1681	2	4	2	3.05676e+07	11.4
High	B9EIE9	Adenylosuccinate synthetase isozyme 2 OS=Mus musculus OX=10090 GN=Adss PE=1 SV=1	FALSE	TRUE	10.307	4	4	4	2.60272e+07	10.1
High	Q9D0T1	NHP2-like protein 1 OS=Mus musculus OX=10090 GN=Snu13 PE=1 SV=4	FALSE	TRUE	34.375	4	6	4	9.81038e+07	13.33
High	Q9D0J4	ADP-ribosylation factor-like protein 2 OS=Mus musculus OX=10090 GN=Arl2 PE=1 SV=1	FALSE	TRUE	23.3696	4	4	4	1.58025e+07	9.42
High	Q5SWD9	Pre-rRNA-processing protein TSR1 homolog OS=Mus musculus OX=10090 GN=Tsr1 PE=1 SV=1	FALSE	TRUE	6.35118	4	5	4	5.15927e+06	10.08
High	G5E902	Phosphate carrier protein, mitochondrial OS=Mus musculus OX=10090 GN=Slc25a3 PE=1 SV=1	FALSE	TRUE	18.4358	7	7	7	3.02496e+08	14.8
High	Q91YH5	Atlastin-3 OS=Mus musculus OX=10090 GN=Atl3 PE=1 SV=1	FALSE	TRUE	10.3512	5	5	5	3.01089e+07	9.66
High	P40336	Vacuolar protein sorting-associated protein 26A OS=Mus musculus OX=10090 GN=Vps26a PE=1 SV=1	FALSE	TRUE	16.208	4	4	4	2.07841e+07	11.5
High	Q9Z0G0	PDZ domain-containing protein GIPC1 OS=Mus musculus OX=10090 GN=Gipc1 PE=1 SV=1	FALSE	TRUE	12.012	3	3	3	1.70897e+07	9.15
High	A8DUN2	Beta-globin OS=Mus musculus OX=10090 GN=Hbbt1 PE=3 SV=1	FALSE	TRUE	21.7687	3	6	1	407637632	16.56
High	Q4KMM3	Oxidation resistance protein 1 OS=Mus musculus OX=10090 GN=Oxr1 PE=1 SV=3	FALSE	TRUE	5.08083	3	3	3	1.46234e+07	9
High	Q8BWM0	Prostaglandin E synthase 2 OS=Mus musculus OX=10090 GN=Ptges2 PE=1 SV=3	FALSE	TRUE	16.1458	5	5	5	1.01117e+07	11.83
High	H3BKH6	S-formylglutathione hydrolase OS=Mus musculus OX=10090 GN=Esd PE=1 SV=1	FALSE	TRUE	21.0169	4	5	4	1.72769e+07	13.33
High	P10404	MLV-related proviral Env polyprotein OS=Mus musculus OX=10090 PE=1 SV=3	FALSE	TRUE	7.17629	3	5	1		12.16
High	A0A1L1SSH9	SPARC OS=Mus musculus OX=10090 GN=Sparc PE=1 SV=1	FALSE	TRUE	15.3614	4	4	4	1.36158e+07	7.69
High	A0A0R4J097	Transforming growth factor beta receptor type 3 OS=Mus musculus OX=10090 GN=Tgfbr3 PE=4 SV=1	FALSE	TRUE	7.64706	6	8	6	85697910	17.97
High	Q9QZM4	Tumor necrosis factor receptor superfamily member 10B OS=Mus musculus OX=10090 GN=Tnfrsf10b PE=2 SV=3	FALSE	TRUE	12.8609	4	4	4	1.86895e+07	10.47
High	Q66JR8	Ptms protein OS=Mus musculus OX=10090 GN=Ptms PE=2 SV=1	FALSE	TRUE	19.9052	4	6	2	191202740	10.27
High	Q8BH30	Importin subunit alpha OS=Mus musculus OX=10090 GN=Kpna6 PE=1 SV=1	FALSE	TRUE	15.2985	7	7	3	1.66151e+07	14.85
High	Q91VH3	Tpm2 protein OS=Mus musculus OX=10090 GN=Tpm2 PE=2 SV=1	FALSE	TRUE	11.3636	4	4	1		12.21
High	H6WCS3	Interleukin-6 signal transductor OS=Mus musculus OX=10090 GN=il6st PE=4 SV=1	FALSE	TRUE	8.9422	5	5	5	2.25088e+07	14.1
High	Q810A7	ATP-dependent RNA helicase DDX42 OS=Mus musculus OX=10090 GN=Ddx42 PE=1 SV=3	FALSE	TRUE	5.48977	5	5	5	1.19882e+07	10.05
High	P63321	Ras-related protein Ral-A OS=Mus musculus OX=10090 GN=Rala PE=1 SV=1	FALSE	TRUE	16.0194	3	4	1	2.97318e+07	9.58
High	Q6ZWX2	Thymosin beta OS=Mus musculus OX=10090 GN=Tmsb4x PE=2 SV=1	FALSE	TRUE	34.0909	2	5	2	2.85474e+08	18.76
High	P99029	Peroxiredoxin-5, mitochondrial OS=Mus musculus OX=10090 GN=Prdx5 PE=1 SV=2	FALSE	TRUE	24.2857	4	5	4	3.02344e+07	11.27
High	Q8BME1	Phosphoacetylglucosamine mutase OS=Mus musculus OX=10090 GN=Pgm3 PE=2 SV=1	FALSE	TRUE	16.0584	8	8	8	3.49432e+07	16
High	O88532	Zinc finger RNA-binding protein OS=Mus musculus OX=10090 GN=Zfr PE=1 SV=2	FALSE	TRUE	6.14525	5	6	5	1.33547e+07	15.02
High	A1L2Z3	C230096C10Rik protein OS=Mus musculus OX=10090 GN=Emc1 PE=2 SV=1	FALSE	TRUE	5.71715	5	5	5	1.3947e+07	12.58
High	Q3TV85	Uncharacterized protein (Fragment) OS=Mus musculus OX=10090 PE=2 SV=1	FALSE	TRUE	10.3371	4	4	4	35273201	9.94
High	Q3TDN2	FAS-associated factor 2 OS=Mus musculus OX=10090 GN=Faf2 PE=1 SV=2	FALSE	TRUE	8.08989	3	3	3	9.41136e+06	8.22
High	P62317	Small nuclear ribonucleoprotein Sm D2 OS=Mus musculus OX=10090 GN=Snrpd2 PE=1 SV=1	FALSE	TRUE	49.1525	5	5	5	31934670	12.23
High	Q5SUF2	Luc7-like protein 3 OS=Mus musculus OX=10090 GN=Luc7l3 PE=1 SV=1	FALSE	TRUE	9.9537	3	3	3	27511403	9.1
High	B2RQC2	Ubiquitin carboxyl-terminal hydrolase 42 OS=Mus musculus OX=10090 GN=Usp42 PE=1 SV=1	FALSE	TRUE	4.83384	5	5	5	8.36826e+06	9.72
High	Q3UMF0	Cordon-bleu protein-like 1 OS=Mus musculus OX=10090 GN=Cobll1 PE=1 SV=2	FALSE	TRUE	5.49882	5	6	5	1.80321e+07	17.49
High	D3YUV1	Nuclear receptor-binding protein OS=Mus musculus OX=10090 GN=Nrbp1 PE=1 SV=1	FALSE	TRUE	10.1289	4	4	4	1.52337e+07	10.48
High	Q9JK23	Proteasome assembly chaperone 1 OS=Mus musculus OX=10090 GN=Psmg1 PE=1 SV=1	FALSE	TRUE	15.5709	4	5	4	2.10594e+07	11.43
High	Q9R0A0	Peroxisomal membrane protein PEX14 OS=Mus musculus OX=10090 GN=Pex14 PE=1 SV=1	FALSE	TRUE	11.1702	4	4	4	2.06067e+07	8.05
High	Q921N6	Probable ATP-dependent RNA helicase DDX27 OS=Mus musculus OX=10090 GN=Ddx27 PE=1 SV=3	FALSE	TRUE	9.73684	7	7	7	9.49029e+06	16.53
High	Q80UU9	Membrane-associated progesterone receptor component 2 OS=Mus musculus OX=10090 GN=Pgrmc2 PE=1 SV=2	FALSE	TRUE	28.1106	4	5	3	2.90573e+07	12.75
High	Q8VDP3	[F-actin]-monooxygenase MICAL1 OS=Mus musculus OX=10090 GN=Mical1 PE=1 SV=1	FALSE	TRUE	5.72519	5	5	5		12.85
High	Q9D172	Glutamine amidotransferase-like class 1 domain-containing protein 3A, mitochondrial OS=Mus musculus OX=10090 GN=Gatd3a PE=1 SV=1	FALSE	TRUE	13.5338	3	4	3	1.52613e+07	9.89
High	Q3UGB5	DAZ-associated protein 1 OS=Mus musculus OX=10090 GN=Dazap1 PE=1 SV=1	FALSE	TRUE	10.3448	3	3	3	9.07216e+06	8.39
High	Q64735	Complement component receptor 1-like protein OS=Mus musculus OX=10090 GN=Cr1l PE=1 SV=1	FALSE	TRUE	9.52381	4	4	1	2.79675e+07	11.68
High	Q2KIH2	ApoN protein OS=Bos taurus GN=ApoN PE=2 SV=1	TRUE	FALSE	22.4409	5	6	5	7.3162e+07	11.48
High	P32020	Non-specific lipid-transfer protein OS=Mus musculus OX=10090 GN=Scp2 PE=1 SV=3	FALSE	TRUE	8.59232	5	5	5	3.55161e+07	10.39
High	Q9R1C7	Pre-mRNA-processing factor 40 homolog A OS=Mus musculus OX=10090 GN=Prpf40a PE=1 SV=1	FALSE	TRUE	7.24029	6	8	6	1.75925e+07	14.48
High	Q9JJK2	LanC-like protein 2 OS=Mus musculus OX=10090 GN=Lancl2 PE=1 SV=1	FALSE	TRUE	12.6667	4	4	4	1.27054e+07	10.99
High	Q02819	Nucleobindin-1 OS=Mus musculus OX=10090 GN=Nucb1 PE=1 SV=2	FALSE	TRUE	10.2397	4	4	4	8.01864e+06	10.09
High	P46460	Vesicle-fusing ATPase OS=Mus musculus OX=10090 GN=Nsf PE=1 SV=2	FALSE	TRUE	7.52688	5	5	5	1.2263e+07	12.55
High	P12849	cAMP-dependent protein kinase type I-beta regulatory subunit OS=Mus musculus OX=10090 GN=Prkar1b PE=1 SV=2	FALSE	TRUE	13.3858	5	5	1		11.11
High	P06745	Glucose-6-phosphate isomerase OS=Mus musculus OX=10090 GN=Gpi PE=1 SV=4	FALSE	TRUE	10.2151	5	5	5	3.09031e+07	13.31
High	O88952	Protein lin-7 homolog C OS=Mus musculus OX=10090 GN=Lin7c PE=1 SV=2	FALSE	TRUE	18.7817	3	3	3	8.83008e+06	8.2
High	Q62446	Peptidyl-prolyl cis-trans isomerase FKBP3 OS=Mus musculus OX=10090 GN=Fkbp3 PE=1 SV=2	FALSE	TRUE	16.5179	3	3	3	25836084	8.77
High	P07607	Thymidylate synthase OS=Mus musculus OX=10090 GN=Tyms PE=1 SV=1	FALSE	TRUE	13.355	3	3	3	7.50738e+06	6.29
High	Q61206	Platelet-activating factor acetylhydrolase IB subunit beta OS=Mus musculus OX=10090 GN=Pafah1b2 PE=1 SV=2	FALSE	TRUE	16.5939	3	4	3	2.19491e+07	11.95
High	P59999	Actin-related protein 2/3 complex subunit 4 OS=Mus musculus OX=10090 GN=Arpc4 PE=1 SV=3	FALSE	TRUE	30.3571	5	5	5	1.30486e+08	9.88
High	Q3THK3	General transcription factor IIF subunit 1 OS=Mus musculus OX=10090 GN=Gtf2f1 PE=1 SV=2	FALSE	TRUE	7.87402	3	3	3	23943001	8.95
High	Q8VI75	Importin-4 OS=Mus musculus OX=10090 GN=Ipo4 PE=1 SV=1	FALSE	TRUE	6.56192	6	6	6	1.967e+07	14.31
High	E9QJT6	Terminal nucleotidyltransferase 4B OS=Mus musculus OX=10090 GN=Tent4b PE=1 SV=1	FALSE	TRUE	8.97059	5	7	5	1.77652e+07	16.79
High	Q15843	NEDD8 OS=Homo sapiens GN=NEDD8 PE=1 SV=1	TRUE	TRUE	17.284	2	3	2	51248958	10.49
High	Q3UVN4	Delta-like protein OS=Mus musculus OX=10090 GN=Jag1 PE=2 SV=1	FALSE	TRUE	3.94089	4	4	4	18522170	10.53
High	Q3TIJ5	Ribosome biogenesis protein BOP1 OS=Mus musculus OX=10090 GN=Bop1 PE=2 SV=1	FALSE	TRUE	6.15595	4	6	4	7.18415e+06	10.69
High	P62918	60S ribosomal protein L8 OS=Mus musculus OX=10090 GN=Rpl8 PE=1 SV=2	FALSE	TRUE	26.4591	5	6	5	1.51945e+08	12.95
High	P11862	Growth arrest-specific protein 2 OS=Mus musculus OX=10090 GN=Gas2 PE=1 SV=1	FALSE	TRUE	18.7898	5	5	5	1.19095e+08	12.09
High	P51432	1-phosphatidylinositol 4,5-bisphosphate phosphodiesterase beta-3 OS=Mus musculus OX=10090 GN=Plcb3 PE=1 SV=2	FALSE	TRUE	3.97083	4	4	4	5.23133e+06	11.54
High	P30412	Peptidyl-prolyl cis-trans isomerase C OS=Mus musculus OX=10090 GN=Ppic PE=1 SV=1	FALSE	TRUE	17.4528	3	3	3	2.63101e+07	8.42
High	P51660	Peroxisomal multifunctional enzyme type 2 OS=Mus musculus OX=10090 GN=Hsd17b4 PE=1 SV=3	FALSE	TRUE	9.38776	6	6	6	2.00375e+07	15.99
High	Q497N1	40S ribosomal protein S26 OS=Mus musculus OX=10090 GN=Rps26 PE=1 SV=1	FALSE	TRUE	44.3478	4	5	4	348215317	9.4
High	A0A0A6YX26	60S ribosomal protein L31 OS=Mus musculus OX=10090 GN=Rpl31 PE=1 SV=1	FALSE	TRUE	28.6822	4	7	4	3.03064e+08	11.11
High	Q4V9X1	Ribosome biogenesis protein WDR12 OS=Mus musculus OX=10090 GN=Wdr12 PE=1 SV=1	FALSE	TRUE	9.45626	4	5	4	1.38239e+07	10.55
High	Q8BSY0	Aspartyl/asparaginyl beta-hydroxylase OS=Mus musculus OX=10090 GN=Asph PE=1 SV=1	FALSE	TRUE	6.47773	4	4	4	1.62009e+07	10.64
High	P07091	Protein S100-A4 OS=Mus musculus OX=10090 GN=S100a4 PE=1 SV=1	FALSE	TRUE	25.7426	4	12	4	1118255644	20.36
High	P36916	Guanine nucleotide-binding protein-like 1 OS=Mus musculus OX=10090 GN=Gnl1 PE=1 SV=4	FALSE	TRUE	6.58979	4	4	4	1.86556e+07	8.88
High	P63089	Pleiotrophin OS=Mus musculus OX=10090 GN=Ptn PE=1 SV=1	FALSE	TRUE	27.9762	3	3	3	1.87275e+07	10.29
High	P62852	40S ribosomal protein S25 OS=Mus musculus OX=10090 GN=Rps25 PE=1 SV=1	FALSE	TRUE	29.6	5	10	5	1.05177e+09	19.88
High	Q8C145	Zinc transporter ZIP6 OS=Mus musculus OX=10090 GN=Slc39a6 PE=1 SV=1	FALSE	TRUE	6.01307	4	4	4	1.16847e+07	9.43
High	Q9QYA2	Mitochondrial import receptor subunit TOM40 homolog OS=Mus musculus OX=10090 GN=Tomm40 PE=1 SV=3	FALSE	TRUE	14.1274	4	7	4	2.85264e+07	19.33
High	Q8R3S9	Ccdc93 protein (Fragment) OS=Mus musculus OX=10090 GN=Ccdc93 PE=2 SV=1	FALSE	TRUE	12.1272	6	6	6	8.73935e+06	15.25
High	Q64213	Splicing factor 1 OS=Mus musculus OX=10090 GN=Sf1 PE=1 SV=6	FALSE	TRUE	9.3415	5	7	5	4.38908e+07	16.08
High	Q543N7	Uncharacterized protein OS=Mus musculus OX=10090 GN=Pacsin3 PE=1 SV=1	FALSE	TRUE	11.3208	4	4	4	1.02828e+07	10.93
[truncated: 1,779 more rows]

## Sheet: Tab C
Table S1, Tab C Initial filters for protein dataset for SMA - wash protocol 1 The raw dataset was subjected to filtering using the following conditions: Contaminants = TRUE # Unique Peptides ≥ 2 Parameter definitions: Protein False discovery rate (FDR) Confidence: the metric for global confidence assessment of a large-scale proteomics dataset Accession: Uniprot accession number Description: Name …
[truncated: 904 more rows]

[truncated: 16 more sheets: Tab D, Tab E, Tab F, Tab G, Tab H, Tab I, Tab J, Tab K, Tab L, Tab M, Tab N, Tab O, Tab P, Tab Q, Tab R, Tab S]
